# Supplementary material for: Glycolysis-associated lncRNAs identify a subgroup of cancer patients with poor prognoses and a high-infiltration immune microenvironment
Source: Springer Nature journal article supplement (doi:10.1186/s12916-021-01925-6), 2021-02-25

**Fig. 1B**

# BLCA

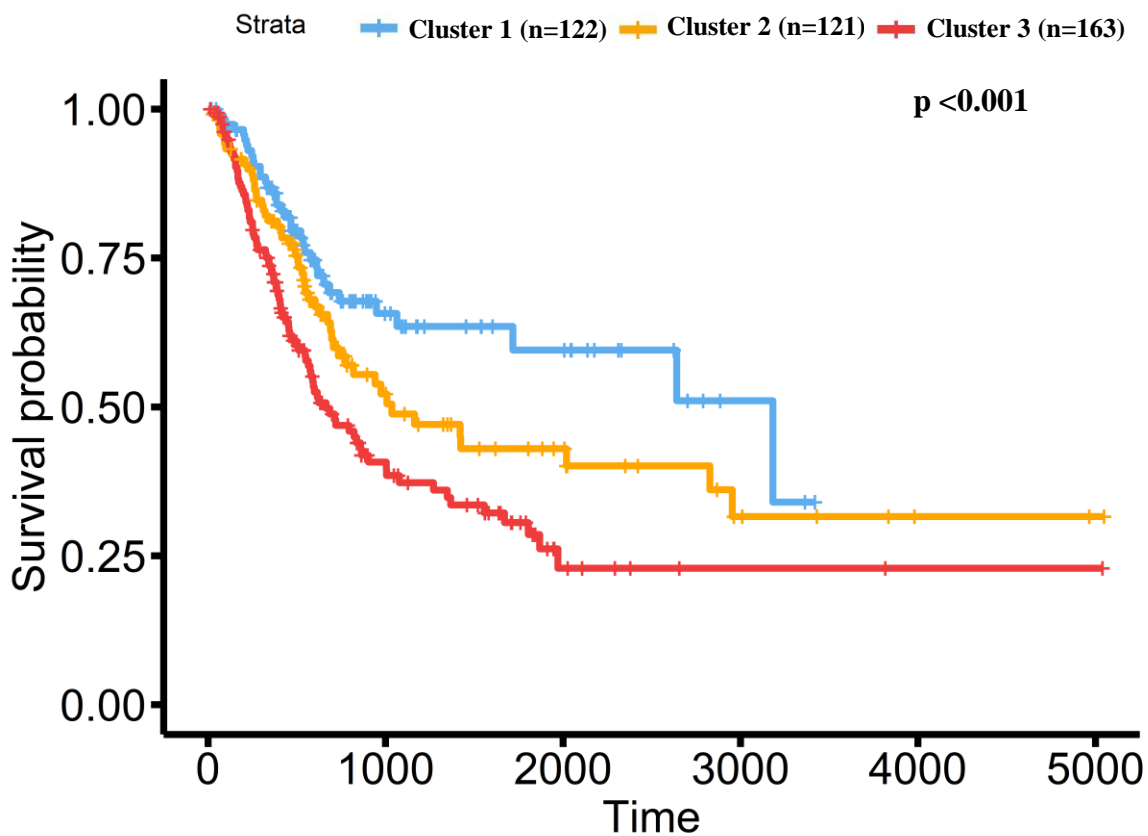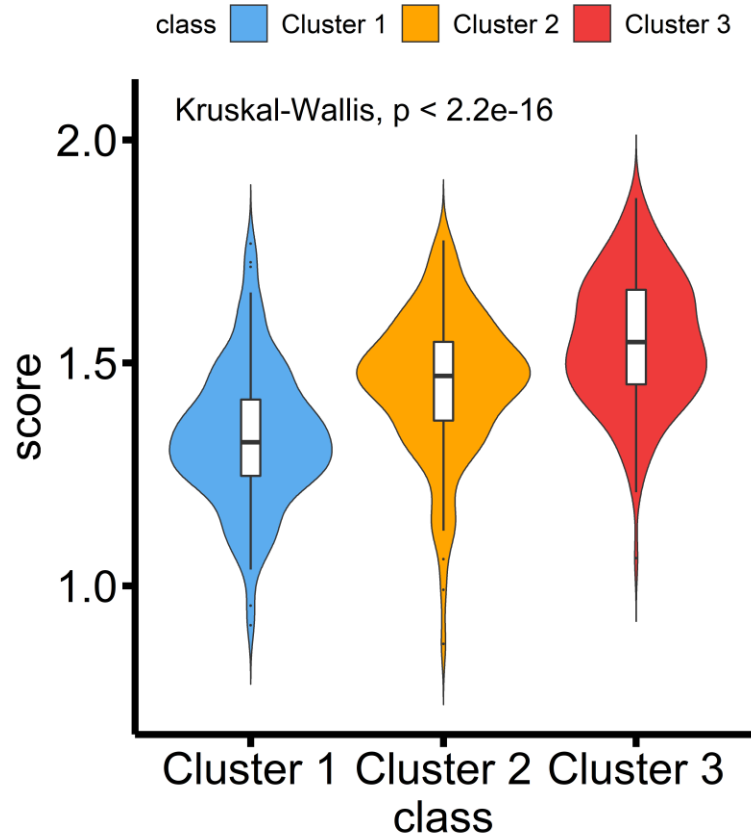

**Fig. 1B**

# PAAD

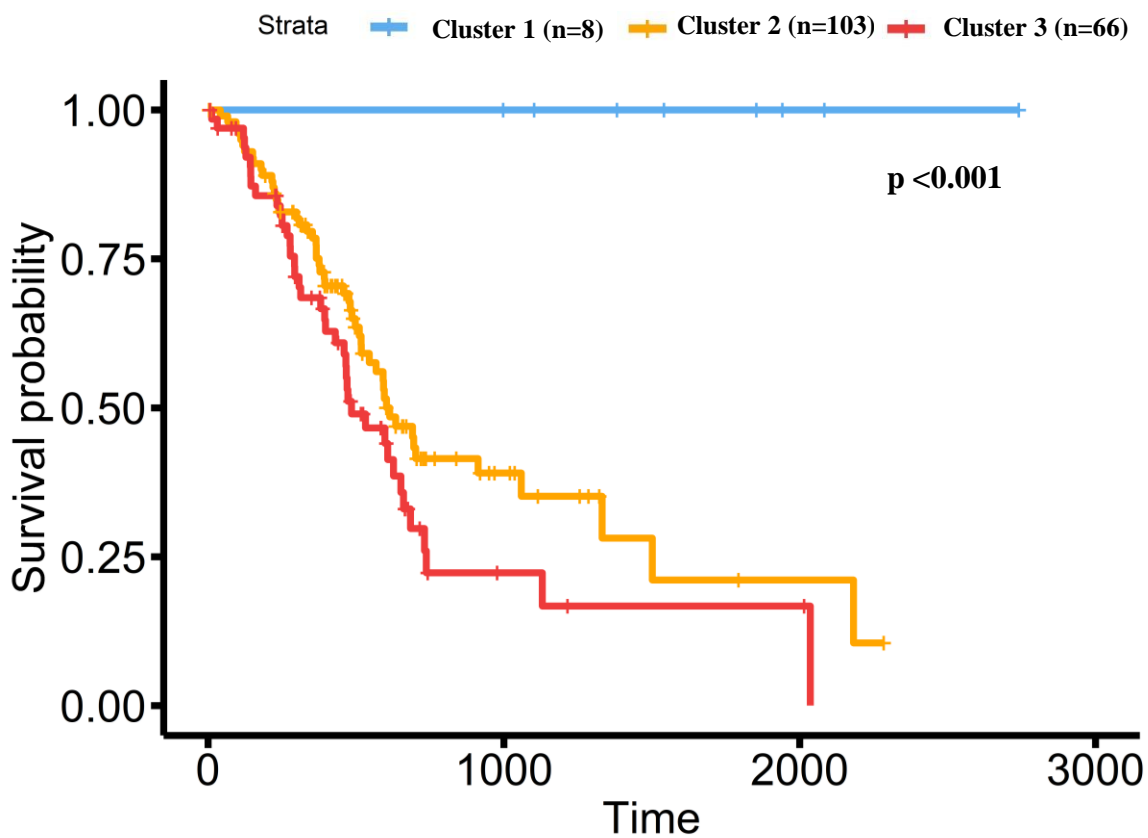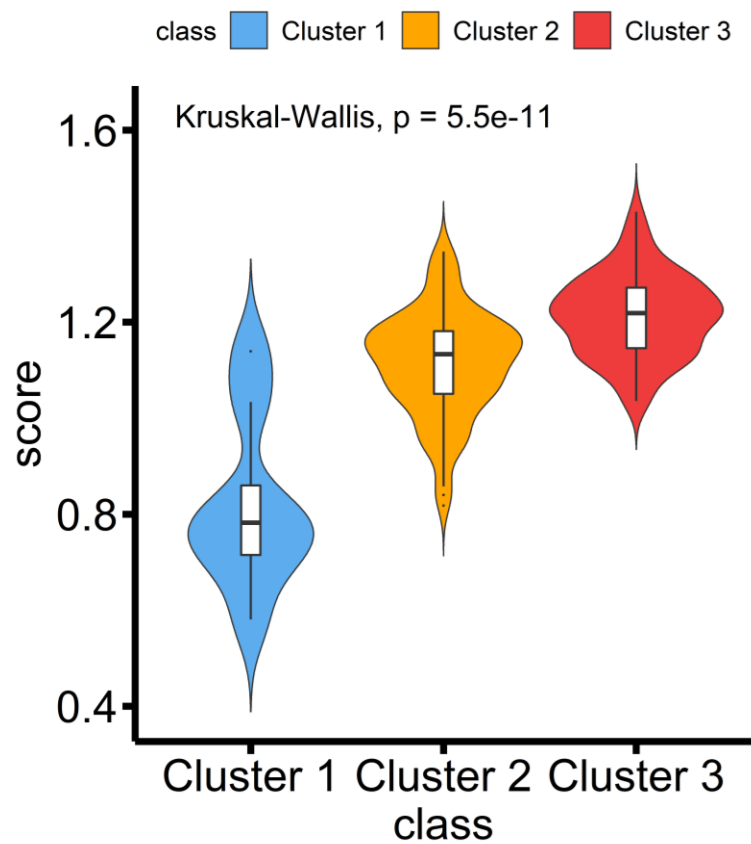

**Fig. 1B**

# LGG

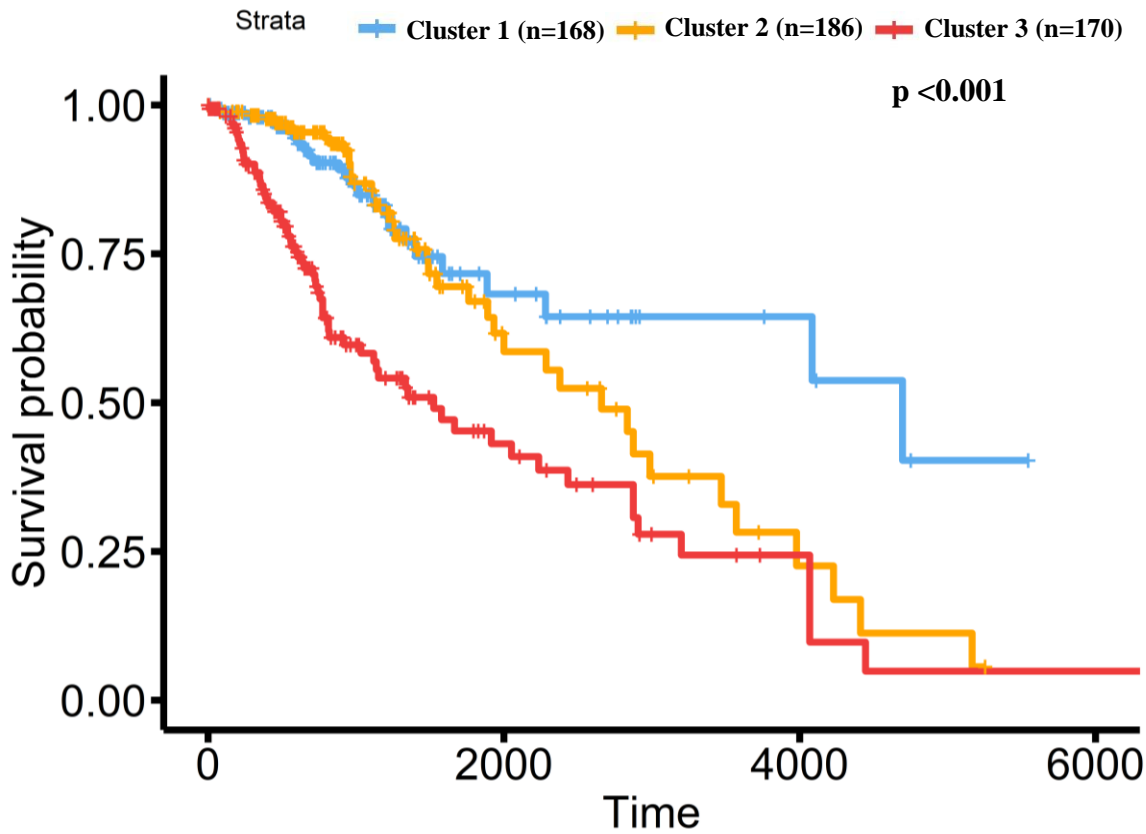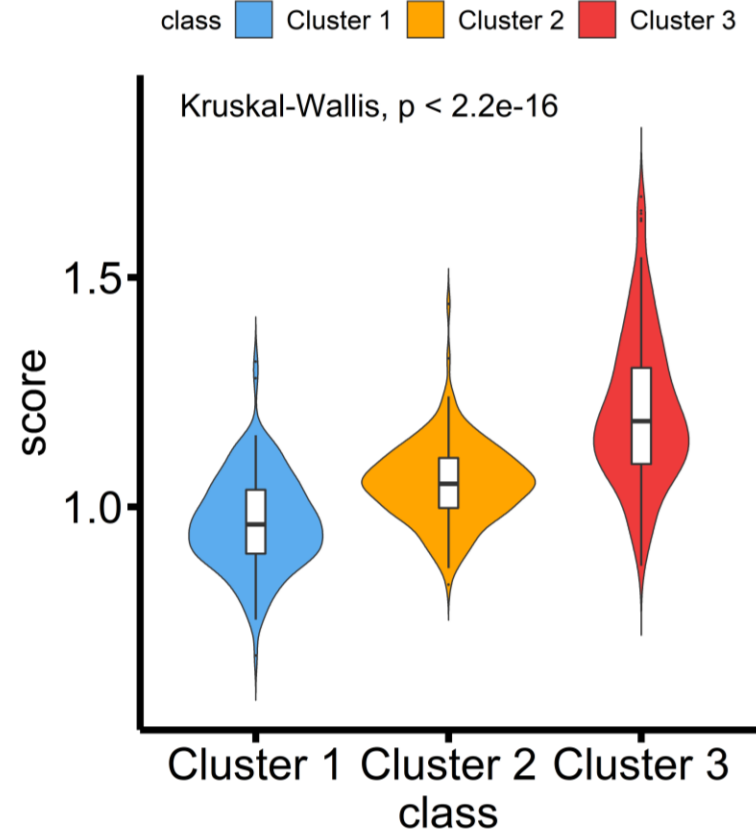

**Fig. 1B**

# MESO

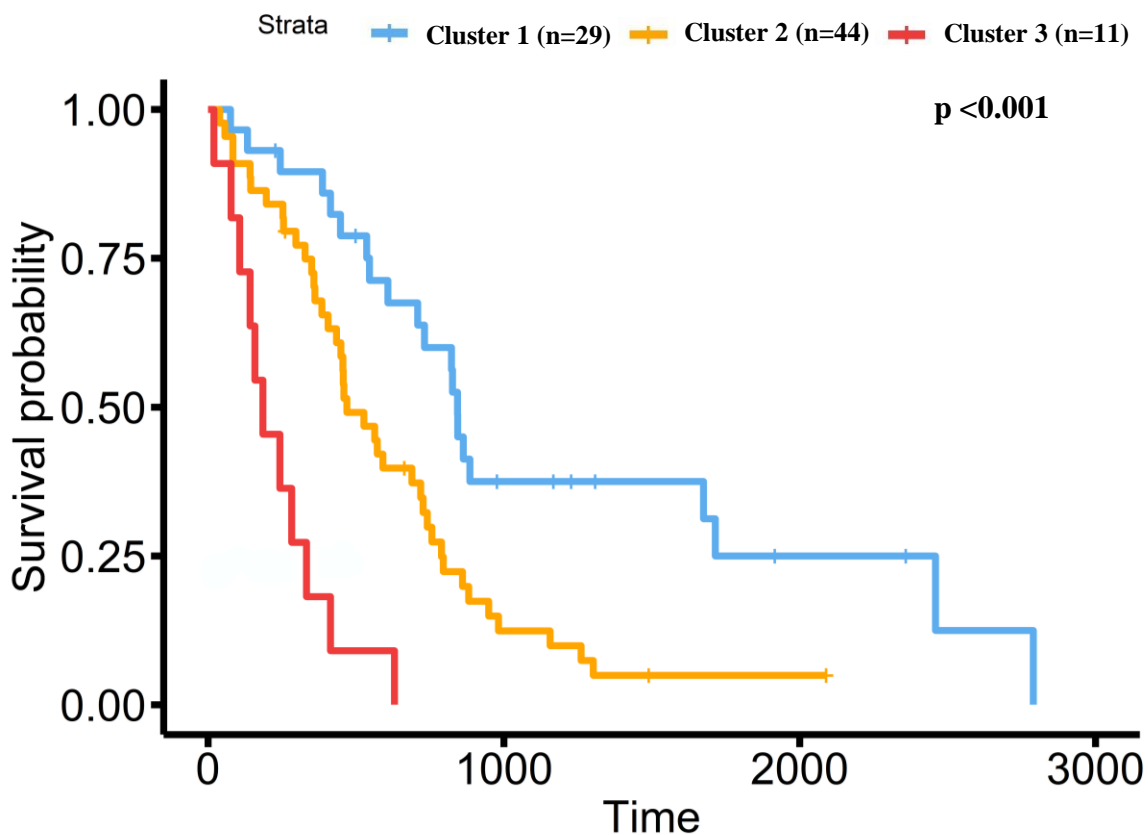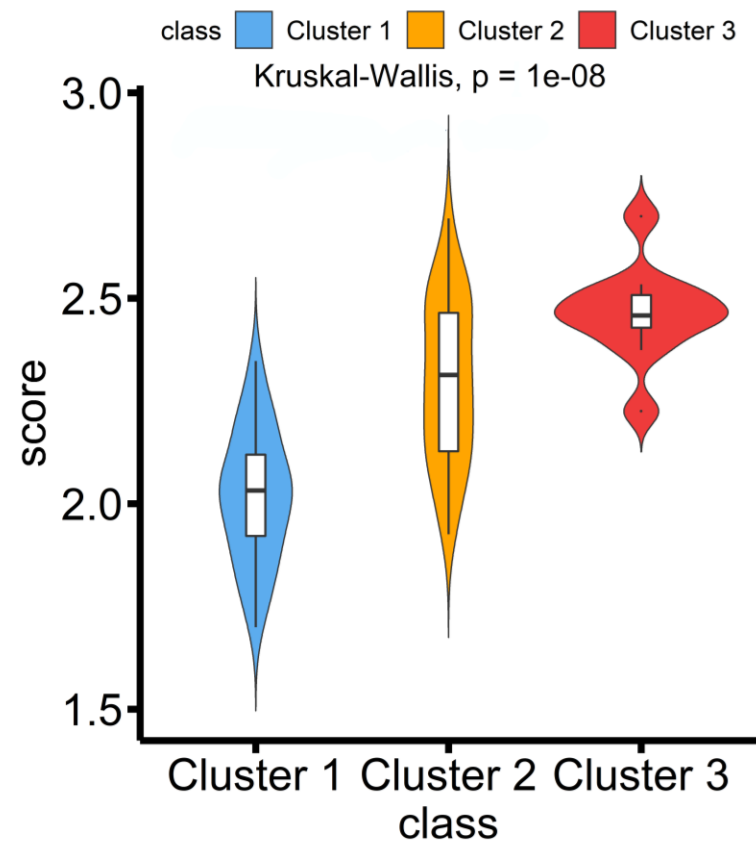

**Fig. 1B**

# UVM

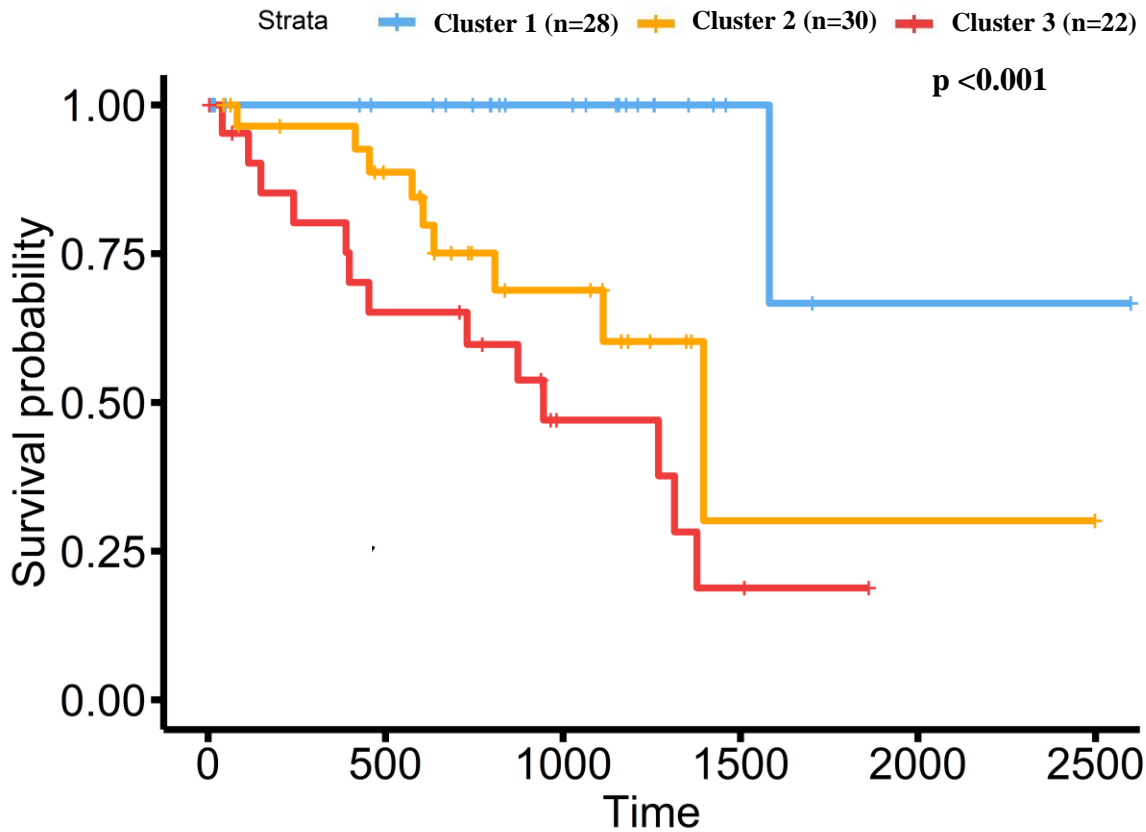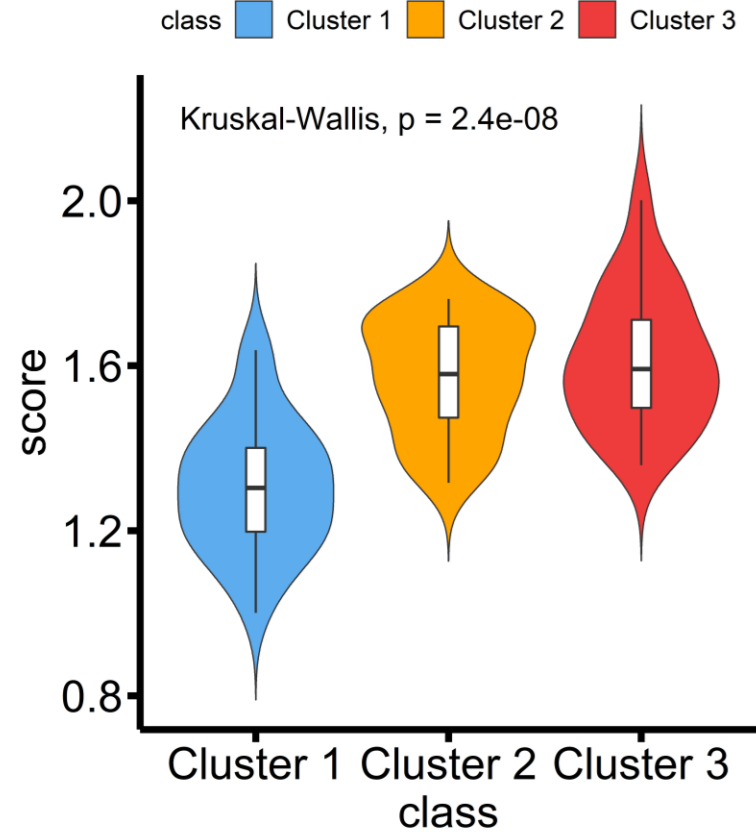

**Fig. 1C**

GSE16011 glioma data

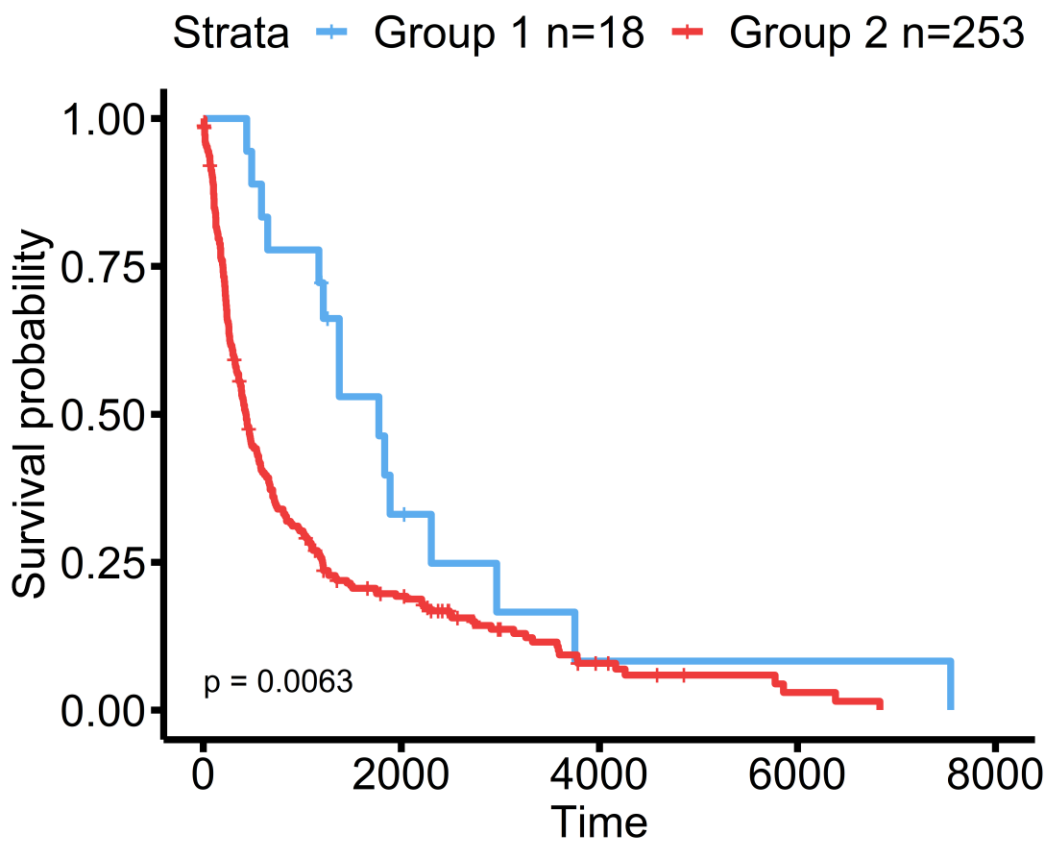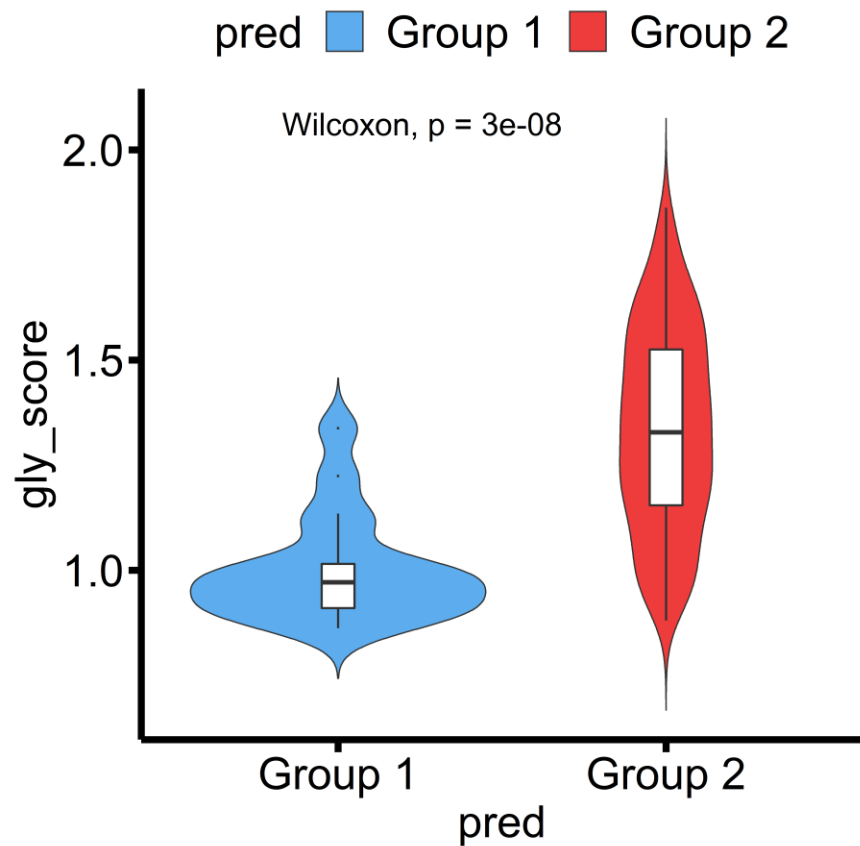

**Fig. 1C**

GSE107850 glioma data

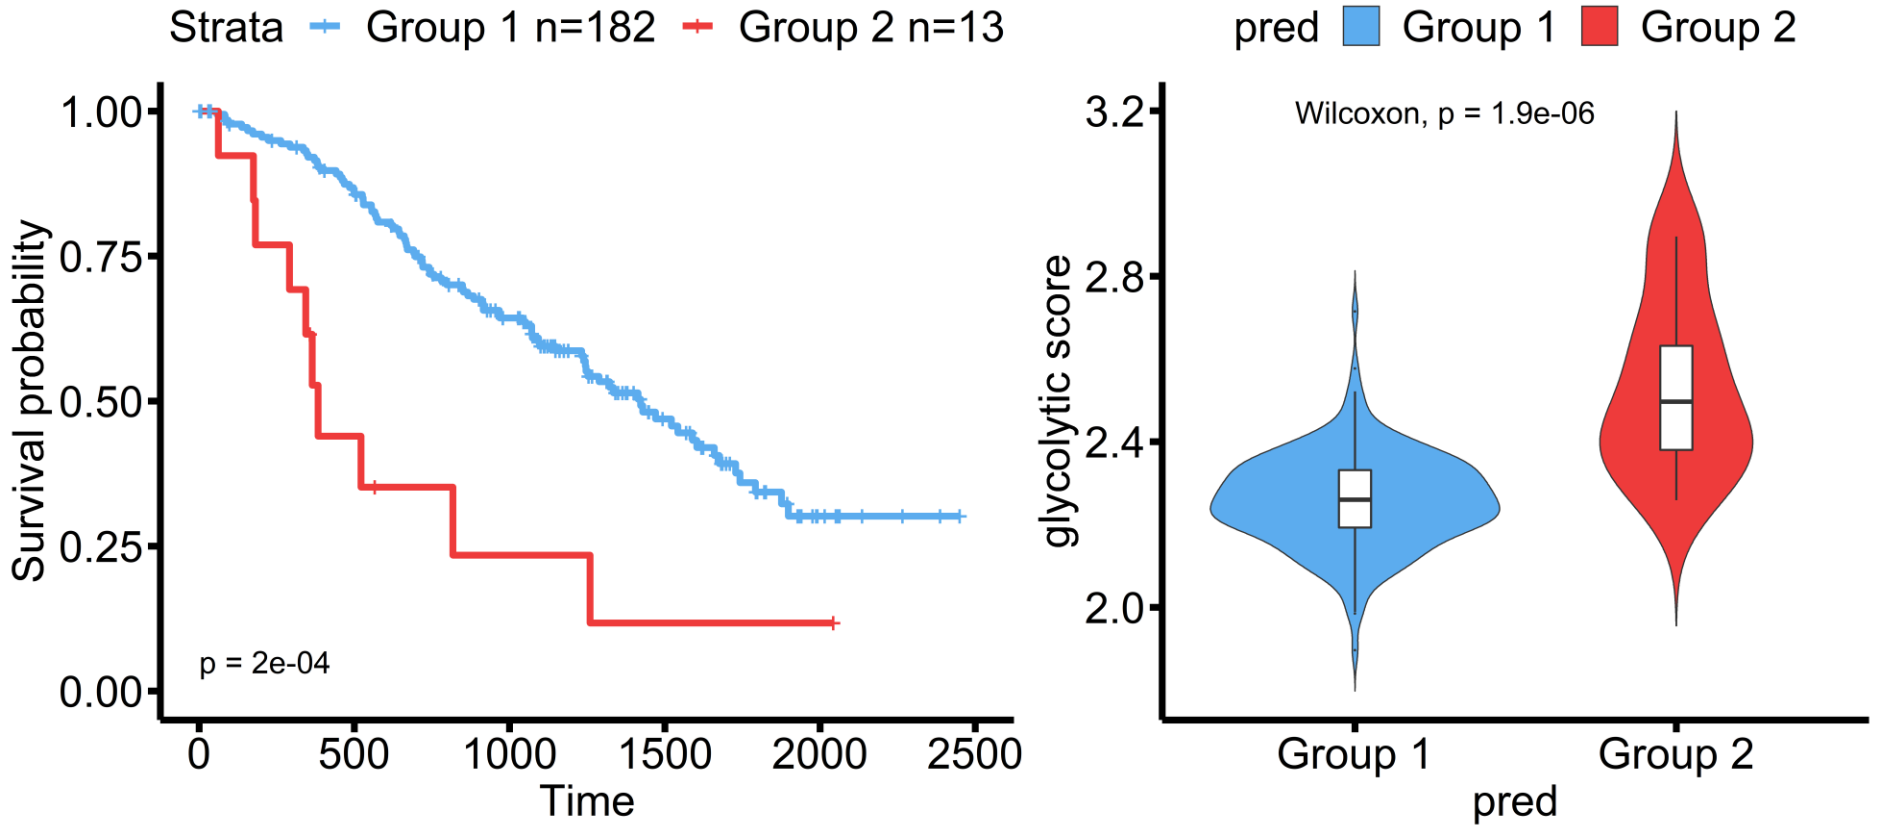

**Fig. 1D**

GSE13507 bladder cancer data

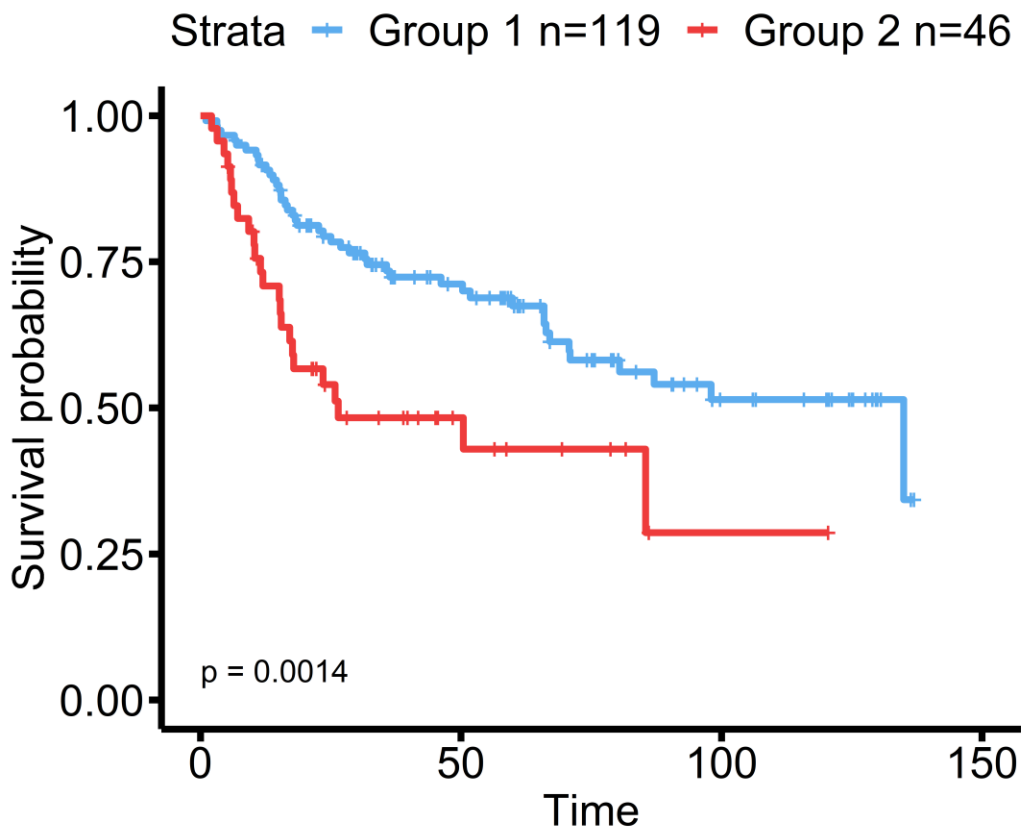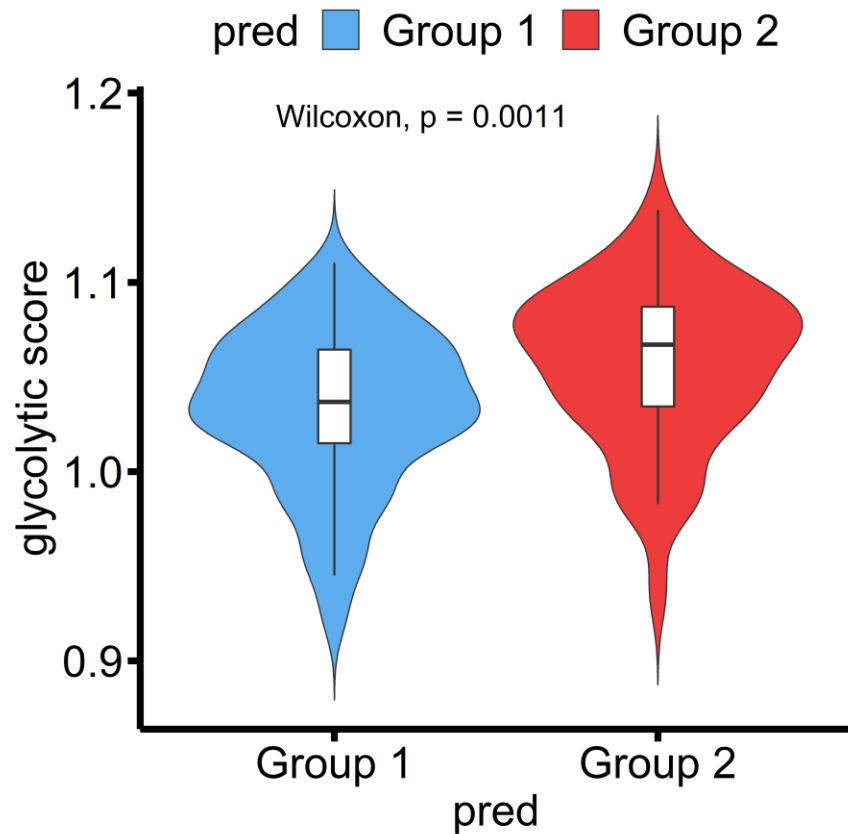



**Fig. 1D**

GSE48075 bladder cancer data

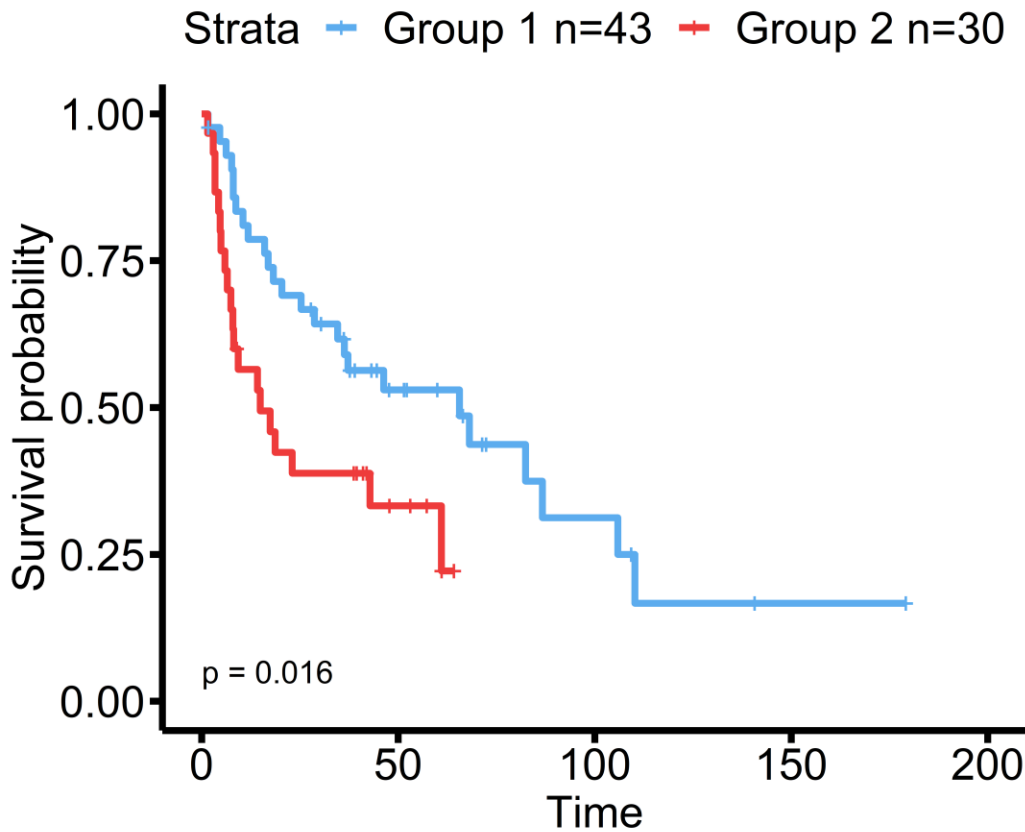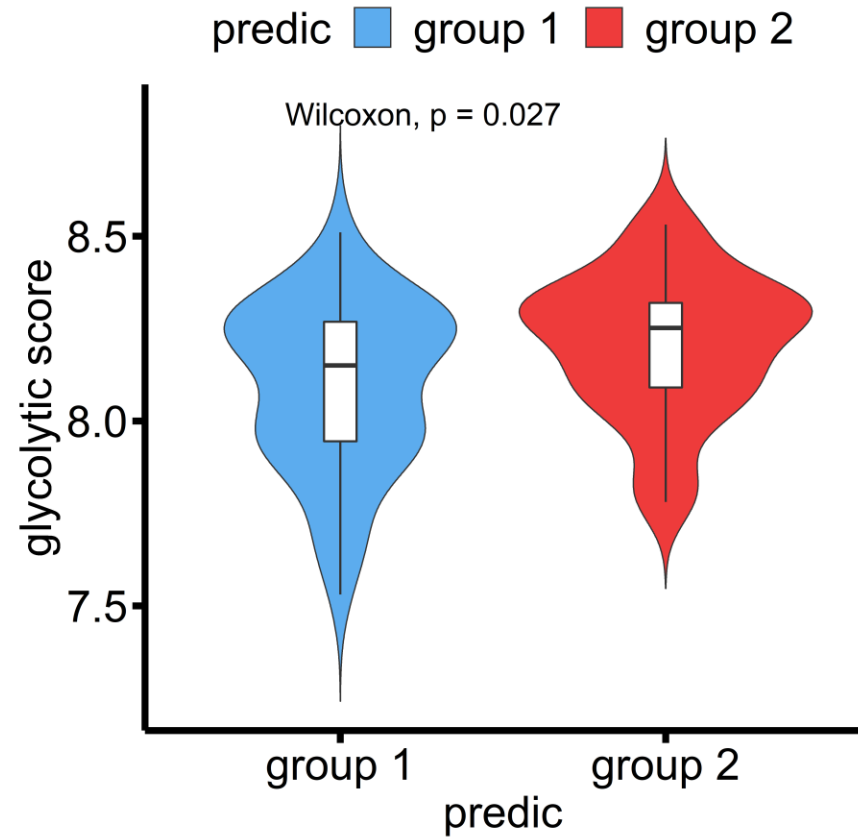

**Fig. 2A**

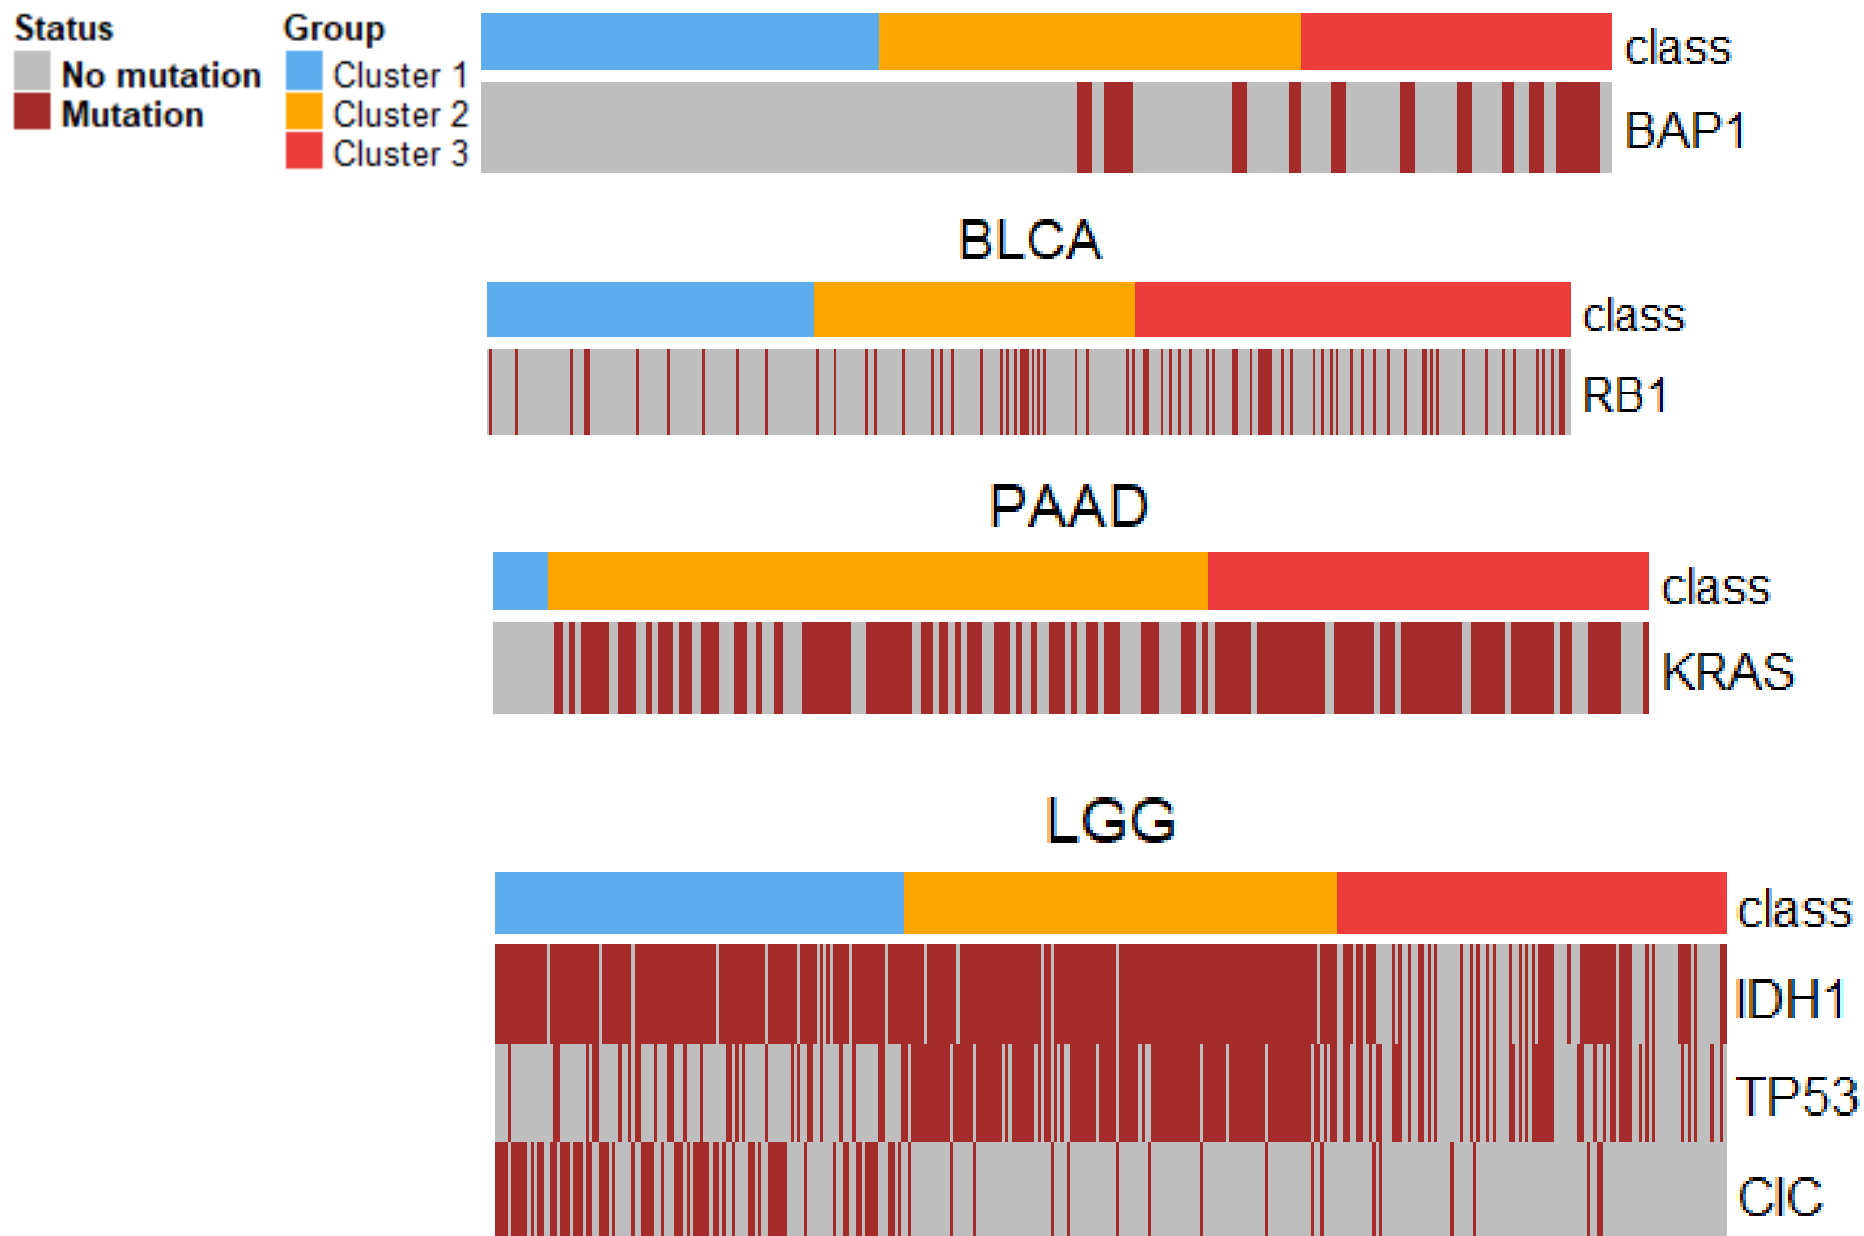

**Fig. 2B**

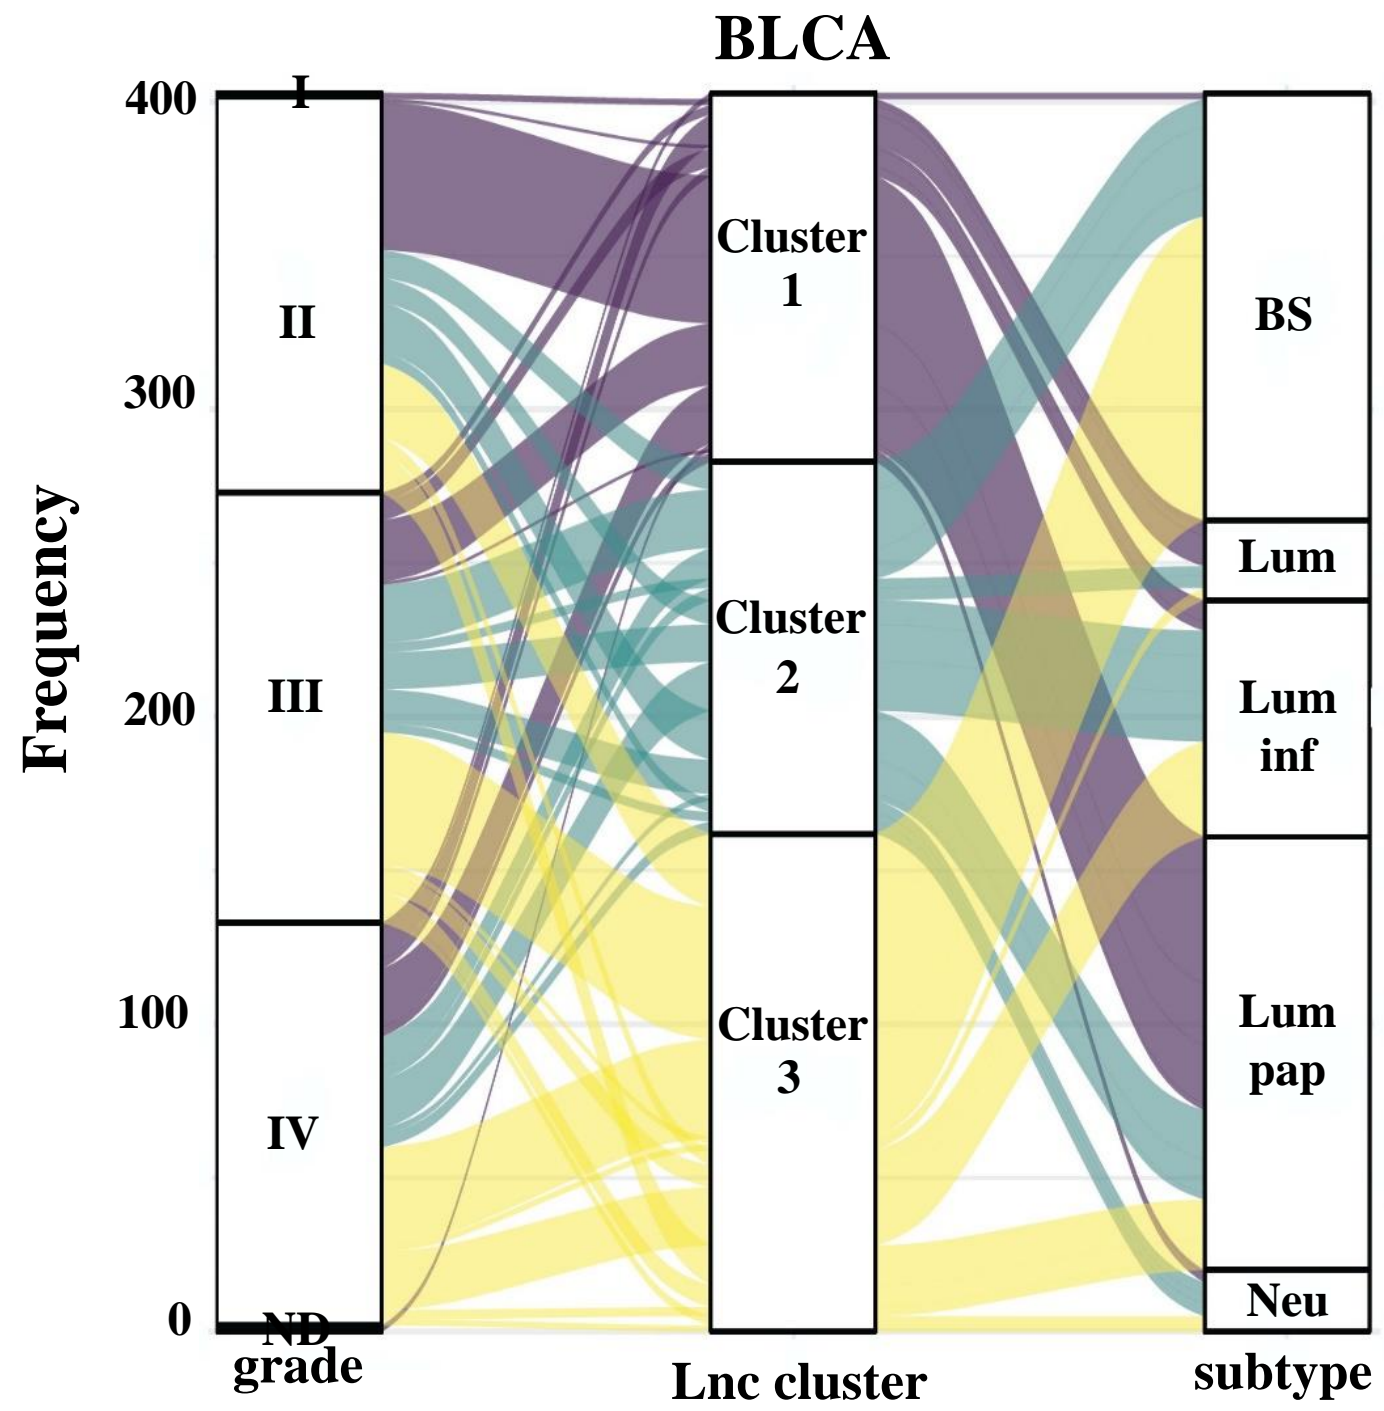

**Fig. 2B**

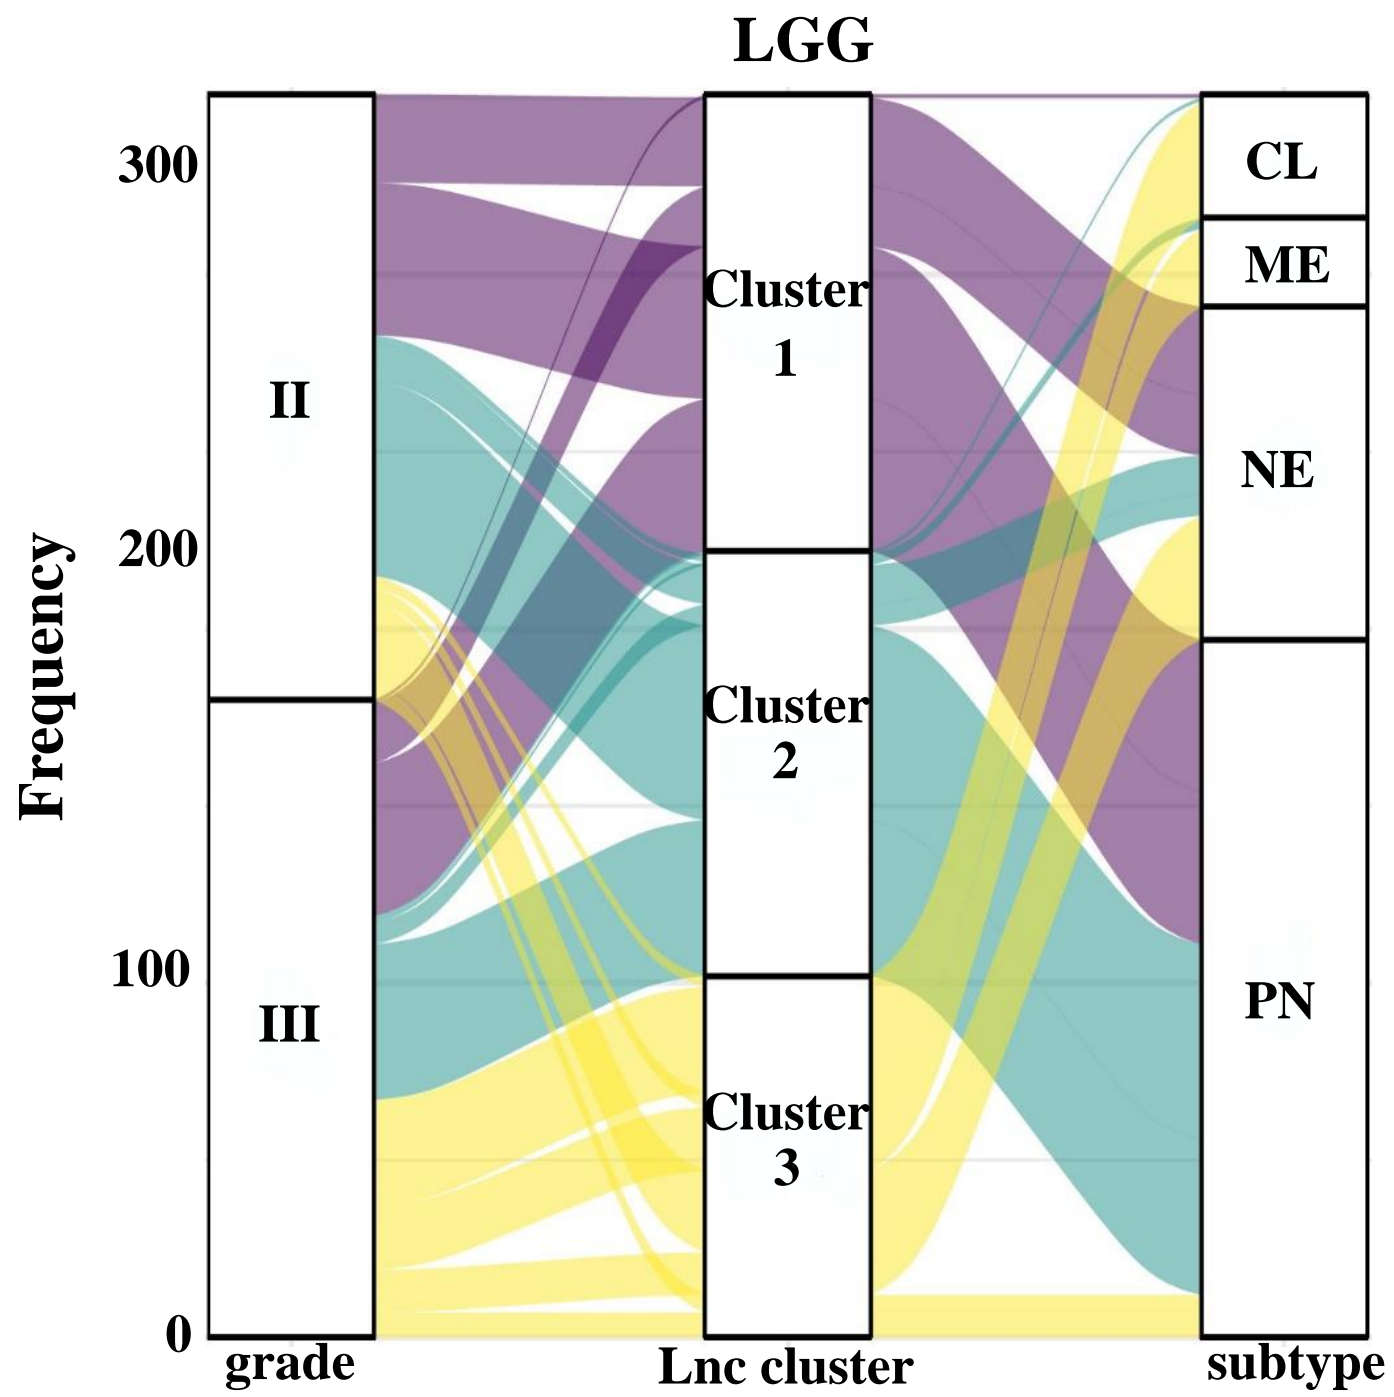

**Fig. 2B**

**MESO**

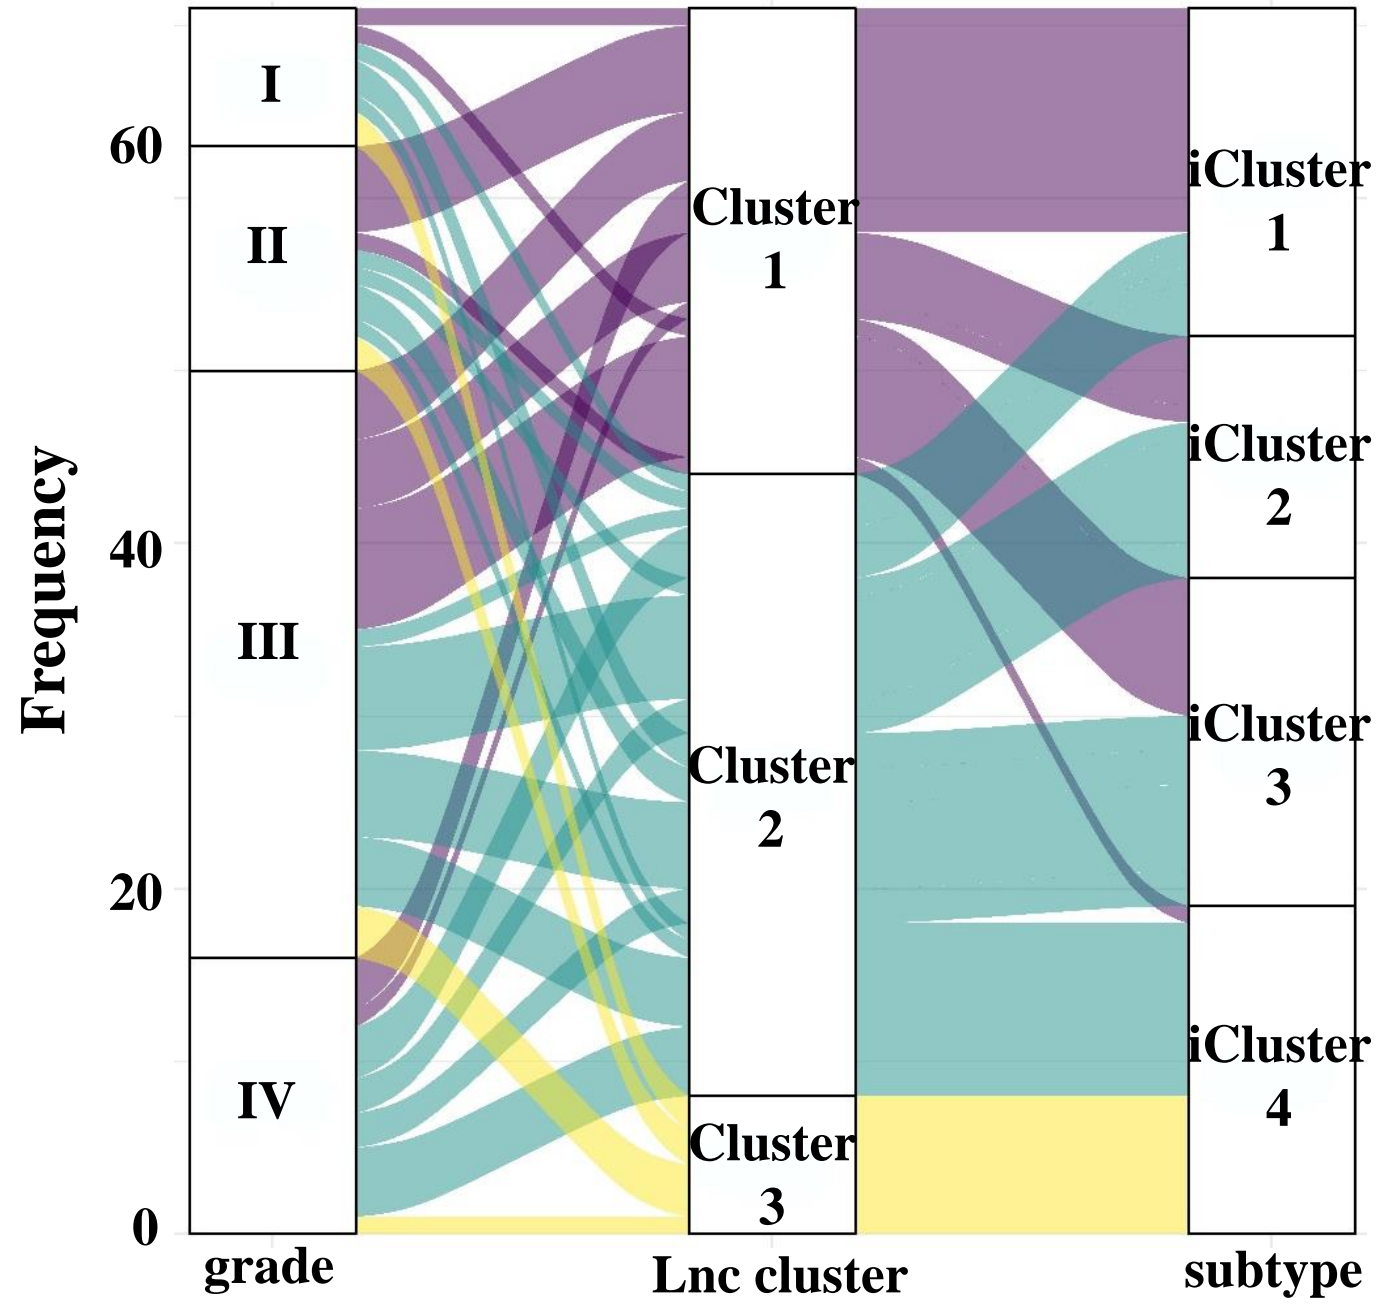

**Fig. 2B**

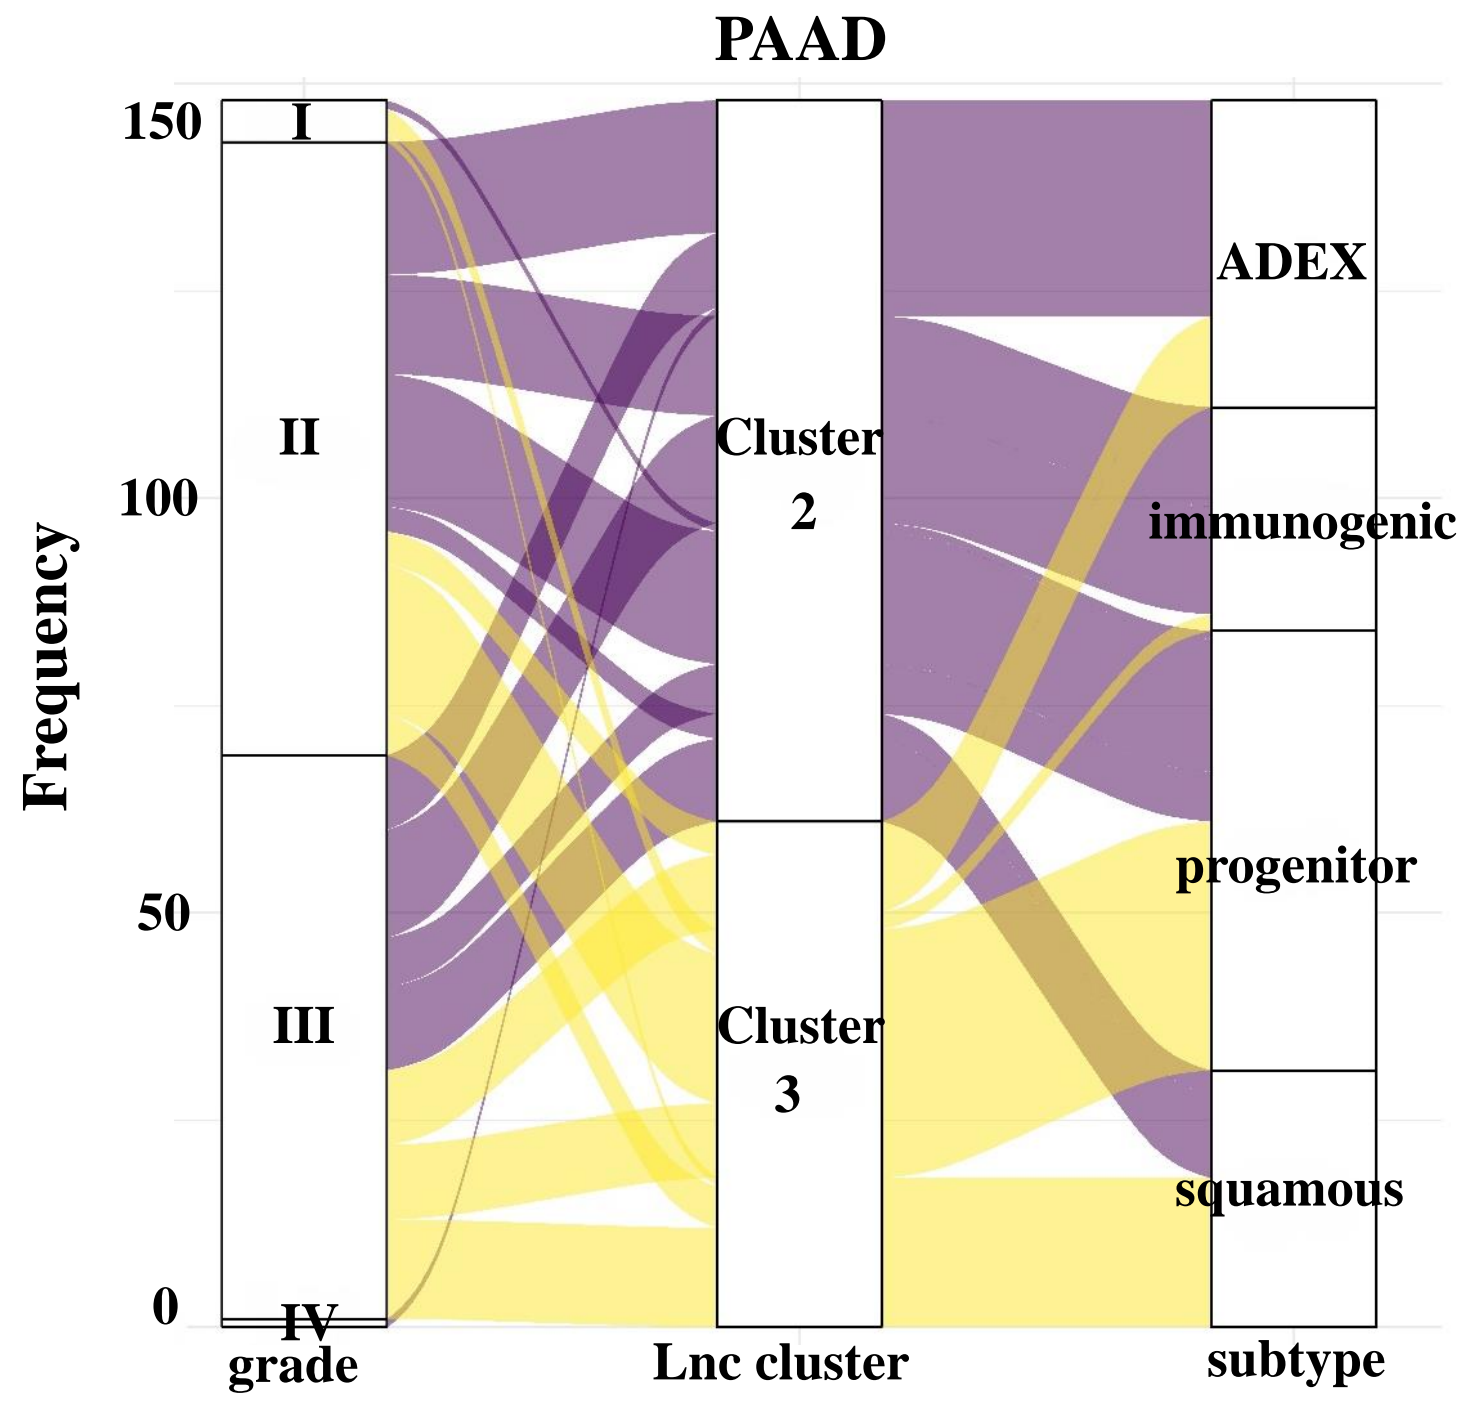

**Fig. 2B**

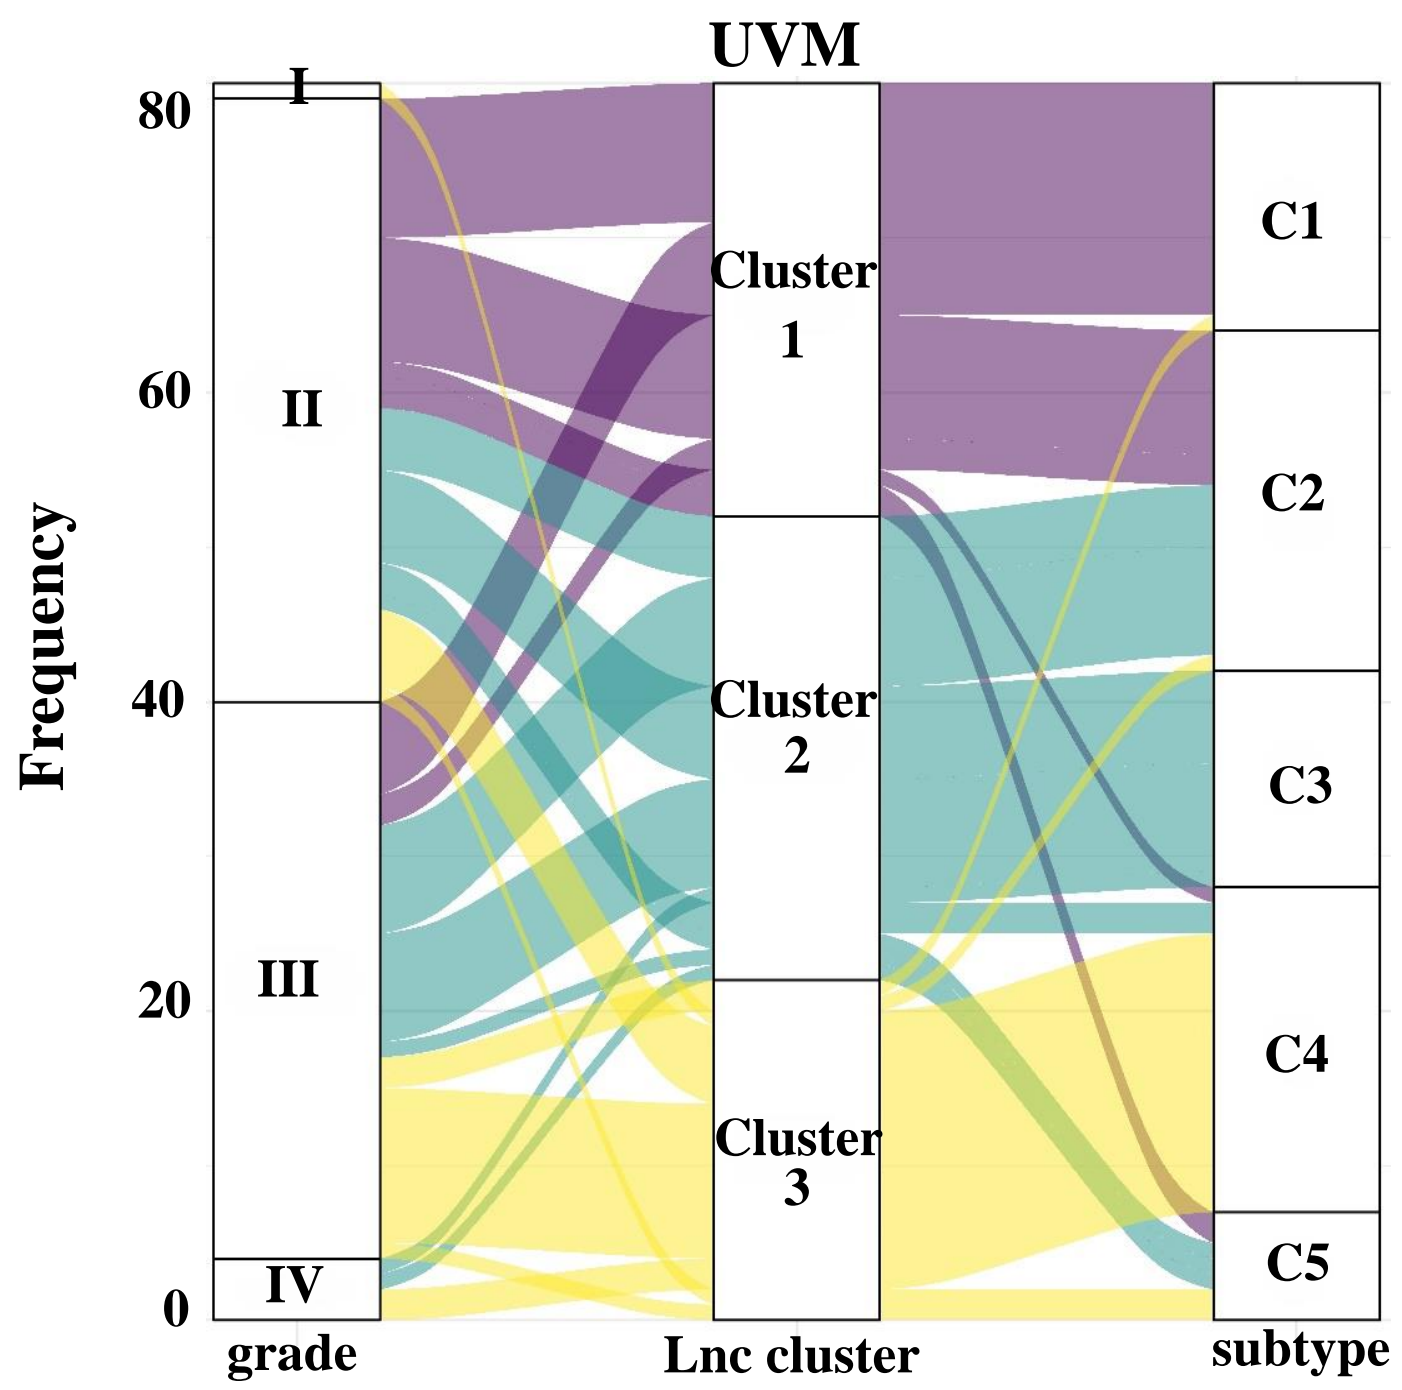



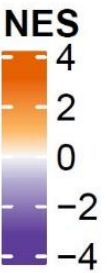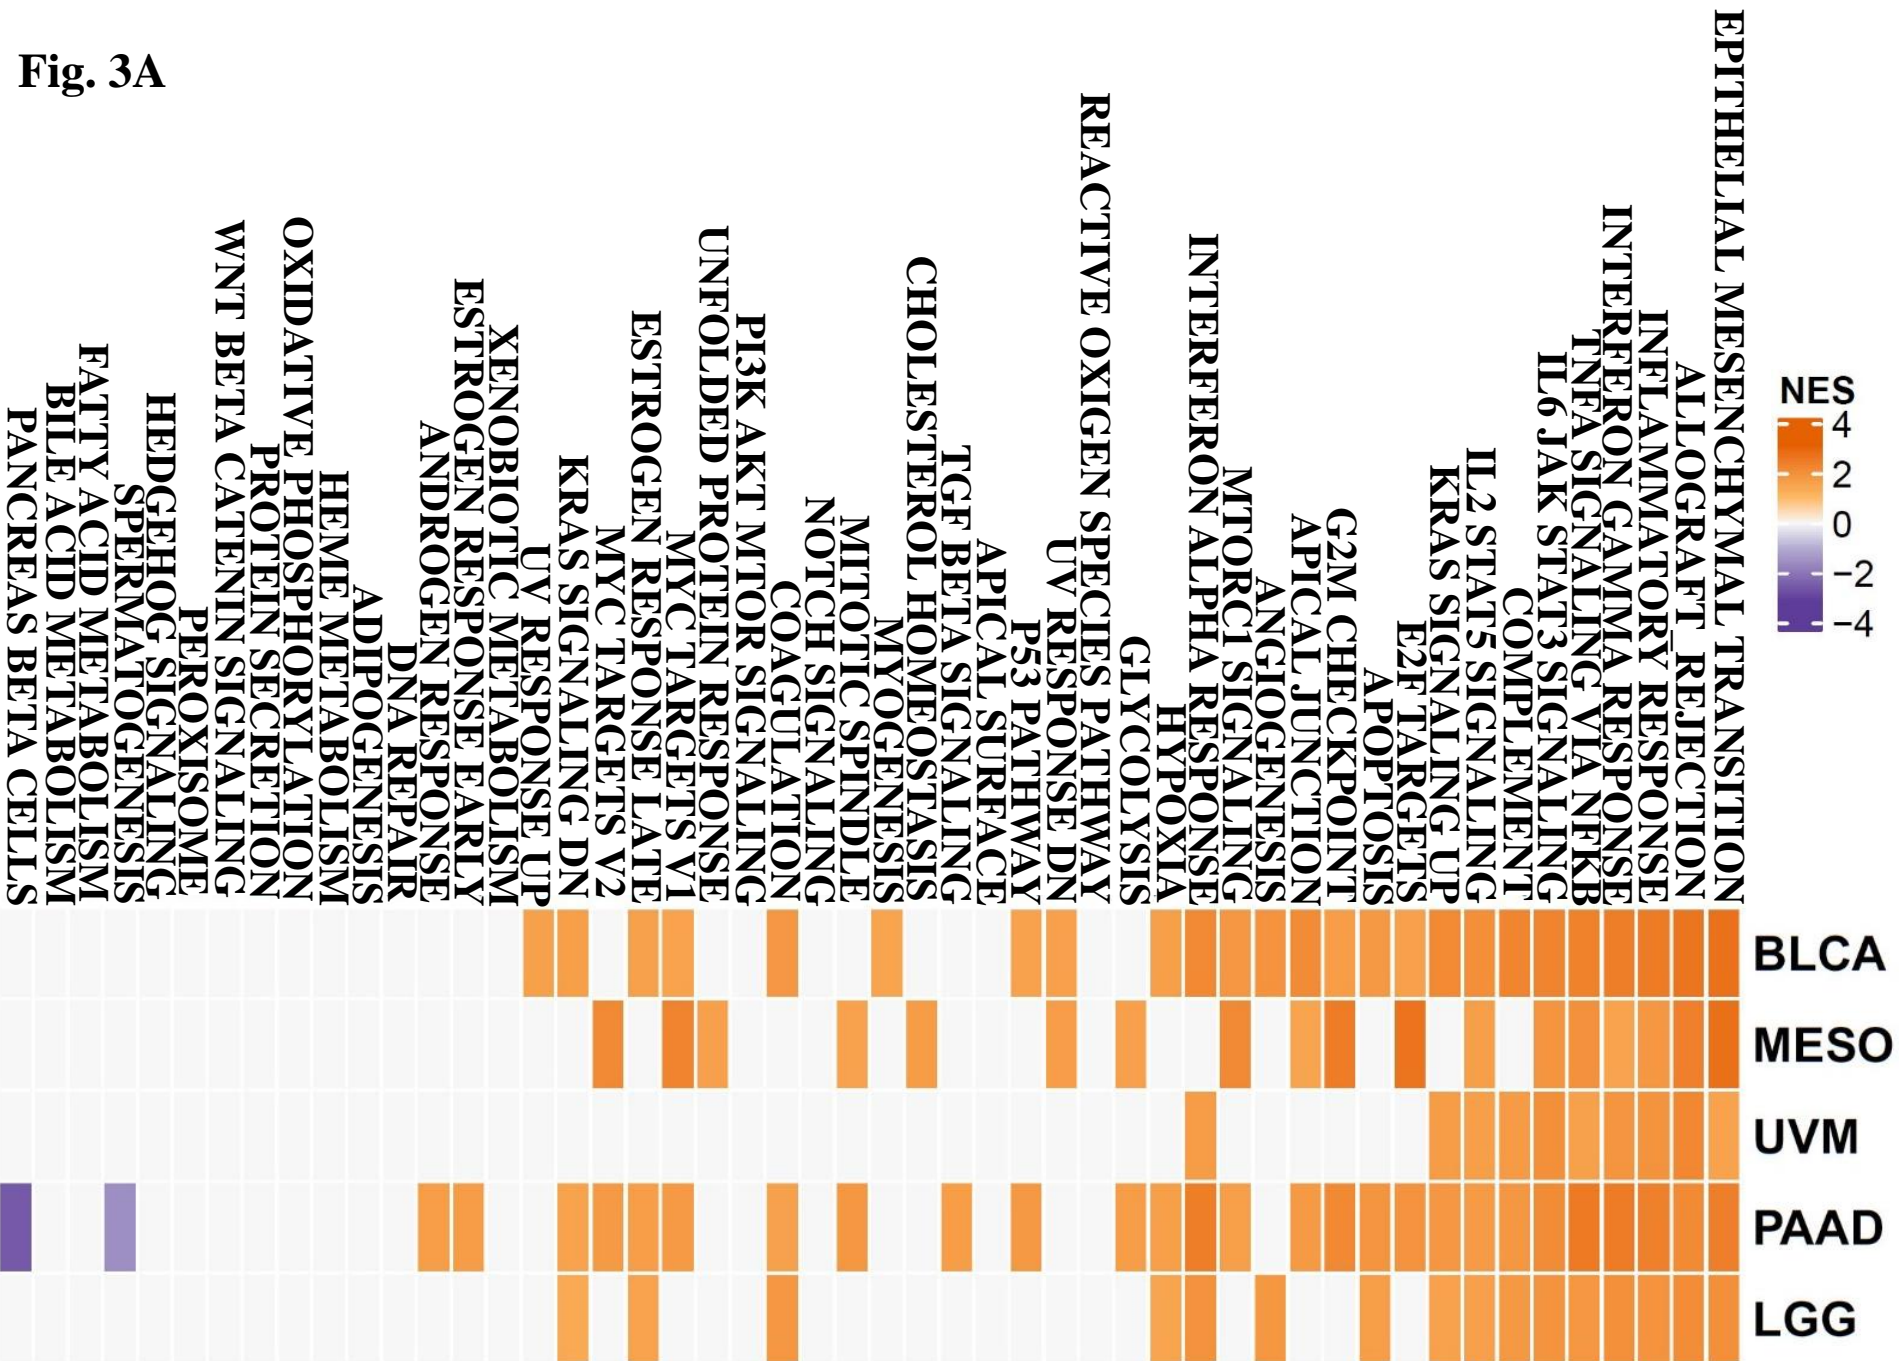



**Fig. 3B**

# BLCA

— Cluster 2 vs. Cluster 1      — Cluster 3 vs. Cluster 1

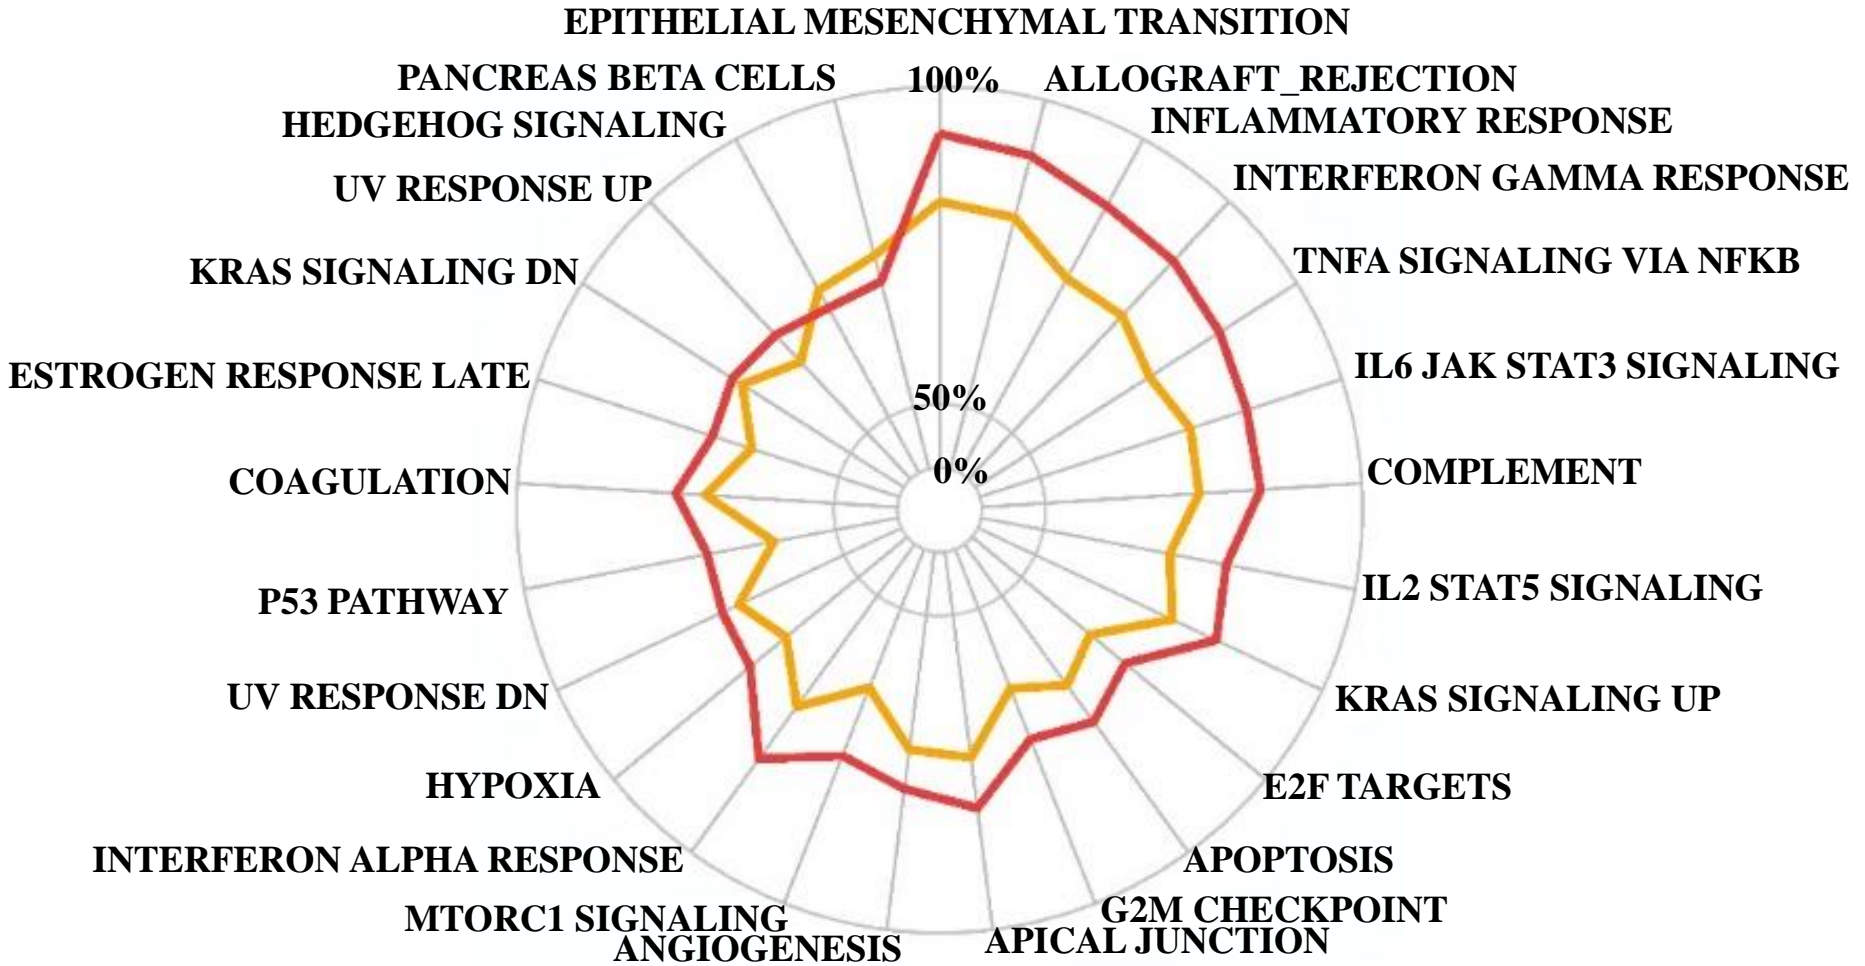

Fig. 3B

# PAAD

Cluster 2 vs. Cluster 1      Cluster 3 vs. Cluster 1

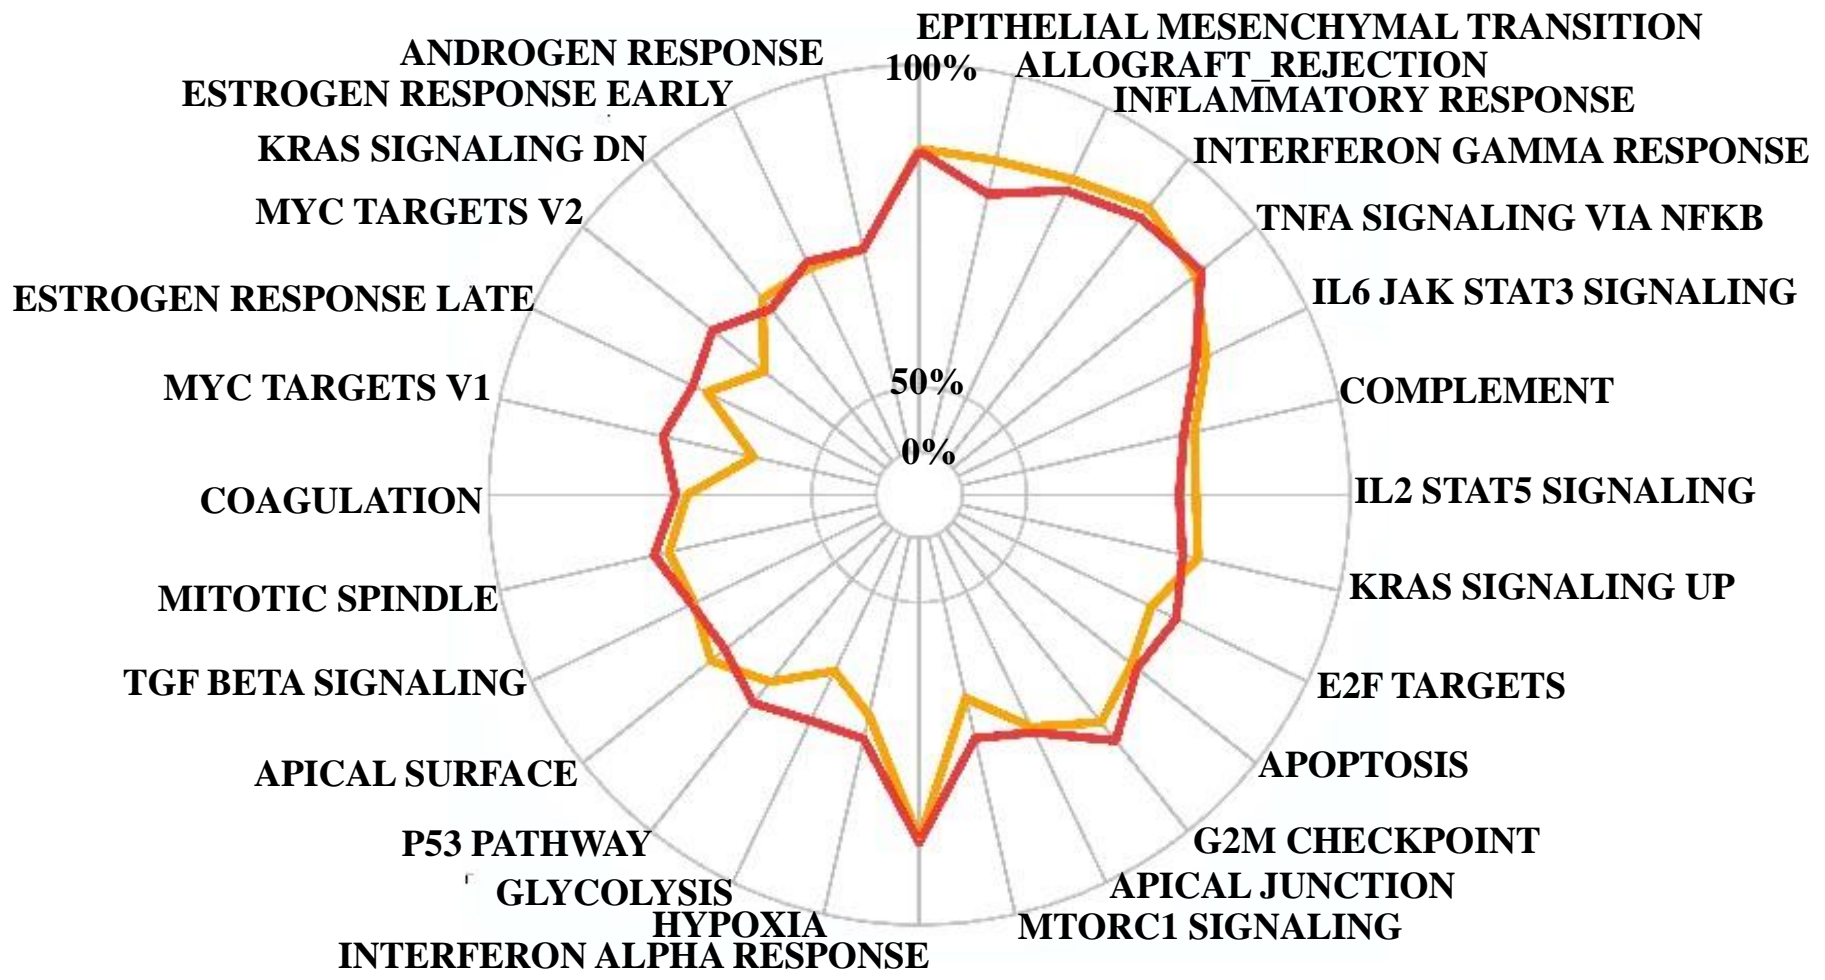

**Fig. 3B**

# UVM

— Cluster 2 vs. Cluster 1    — Cluster 3 vs. Cluster 1

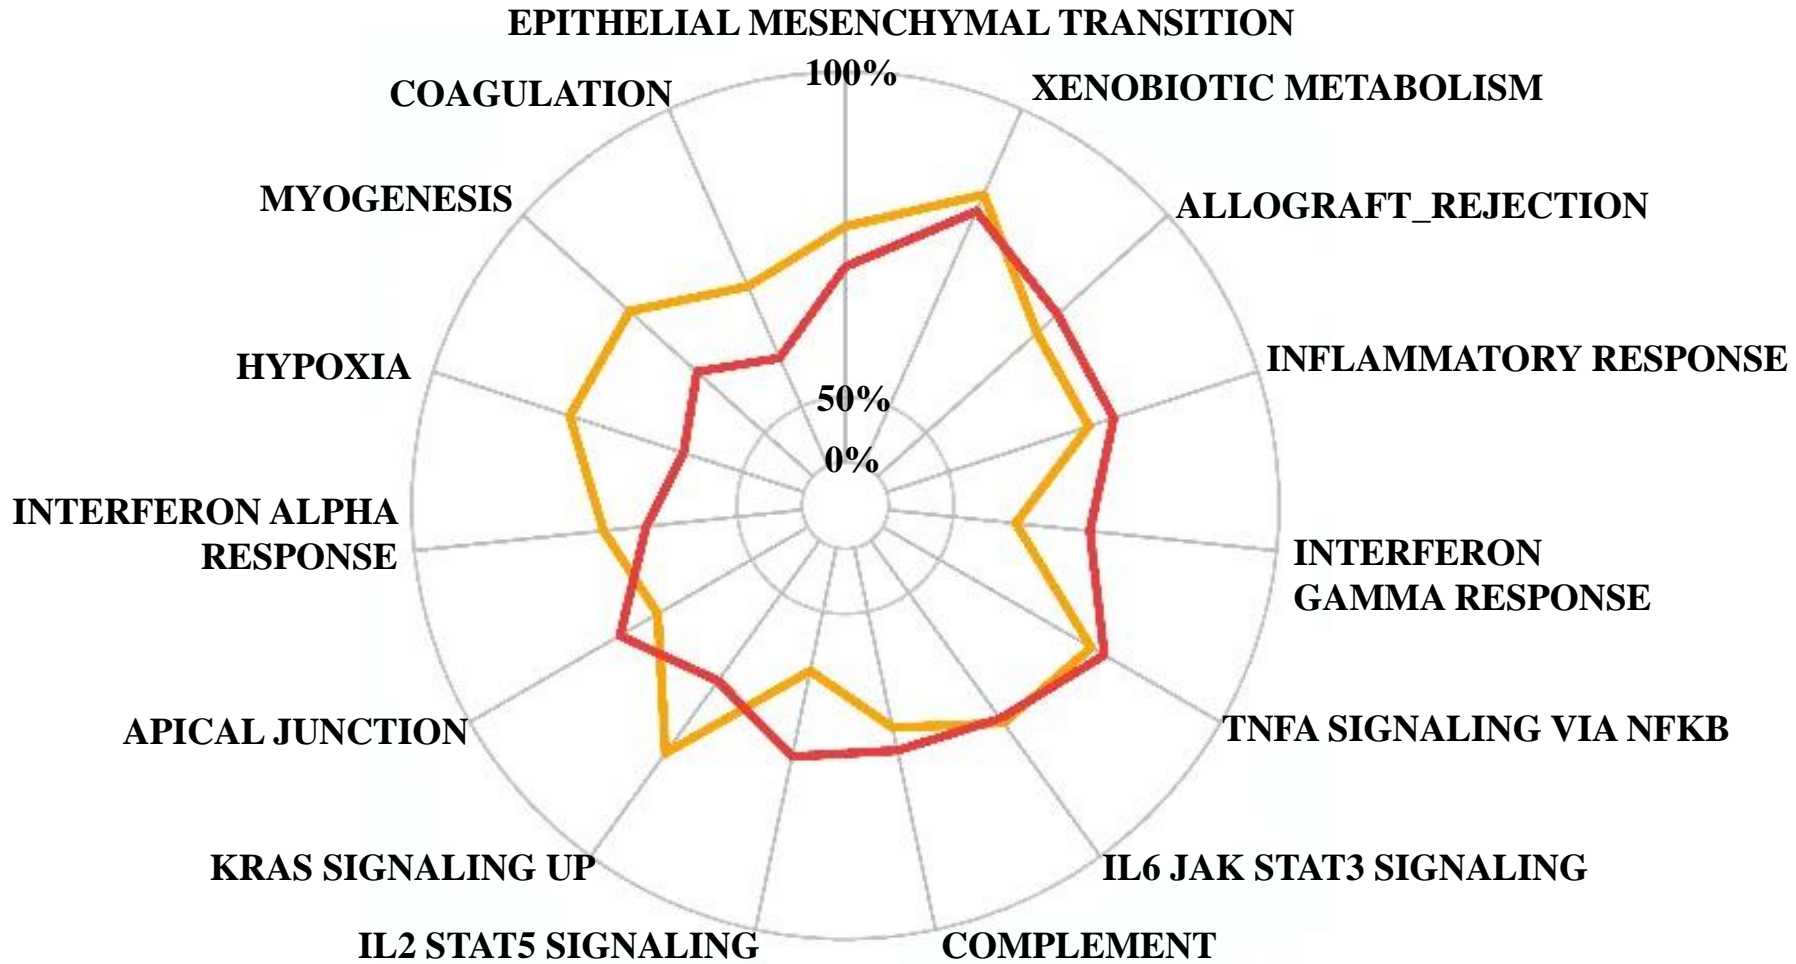

**Fig. 3B**

# MESO

— Cluster 2 vs. Cluster 1      — Cluster 3 vs. Cluster 1

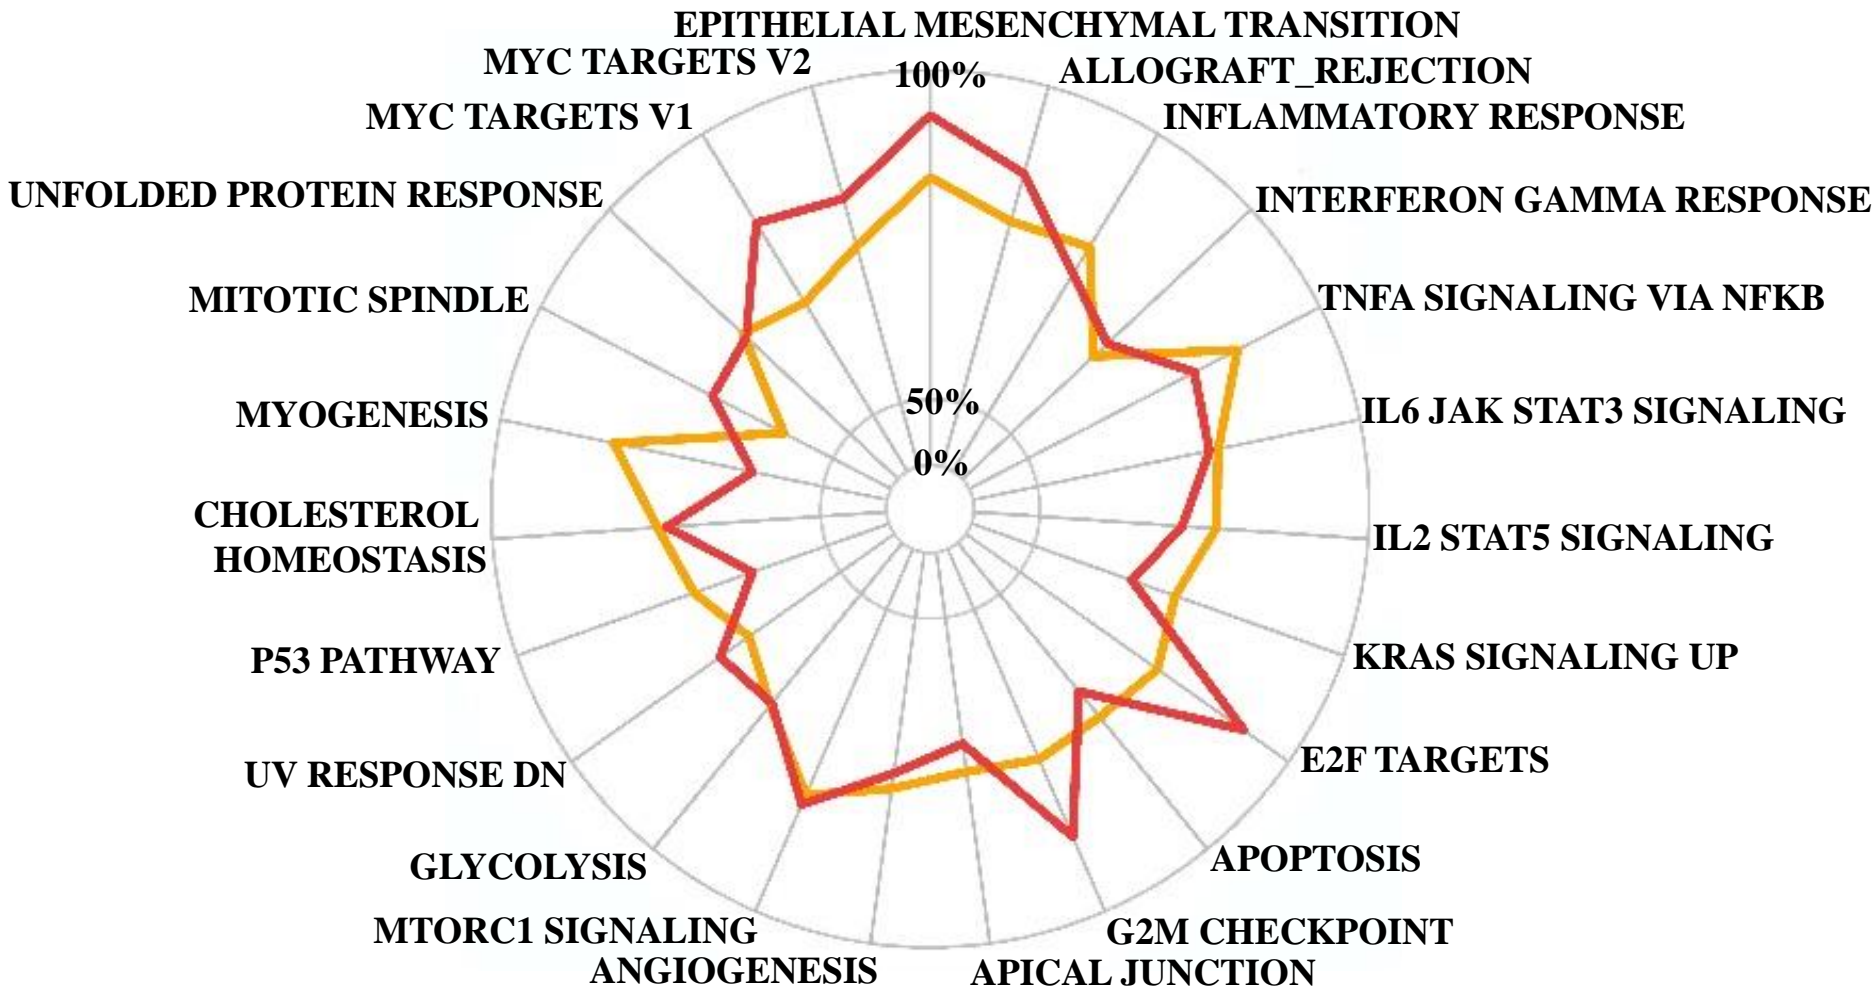

**Fig. 3B**

# LGG

— Cluster 2 vs. Cluster 1    — Cluster 3 vs. Cluster 1

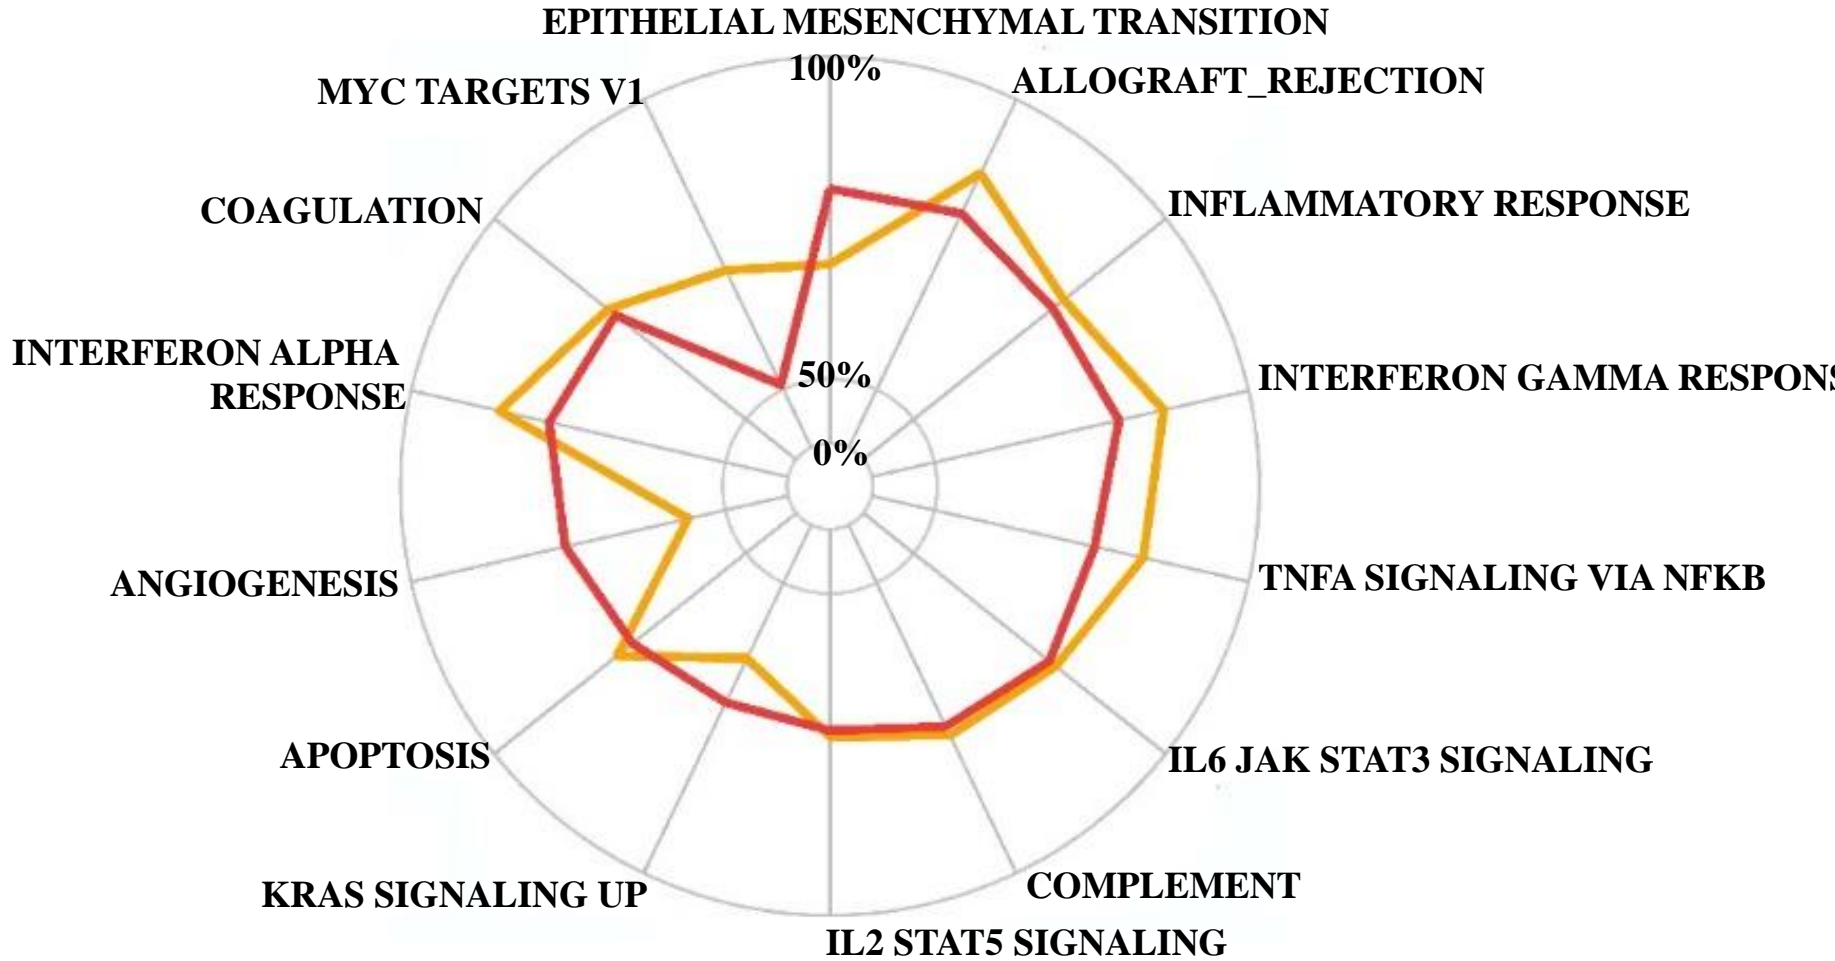



Fig. 4A

# BLCA

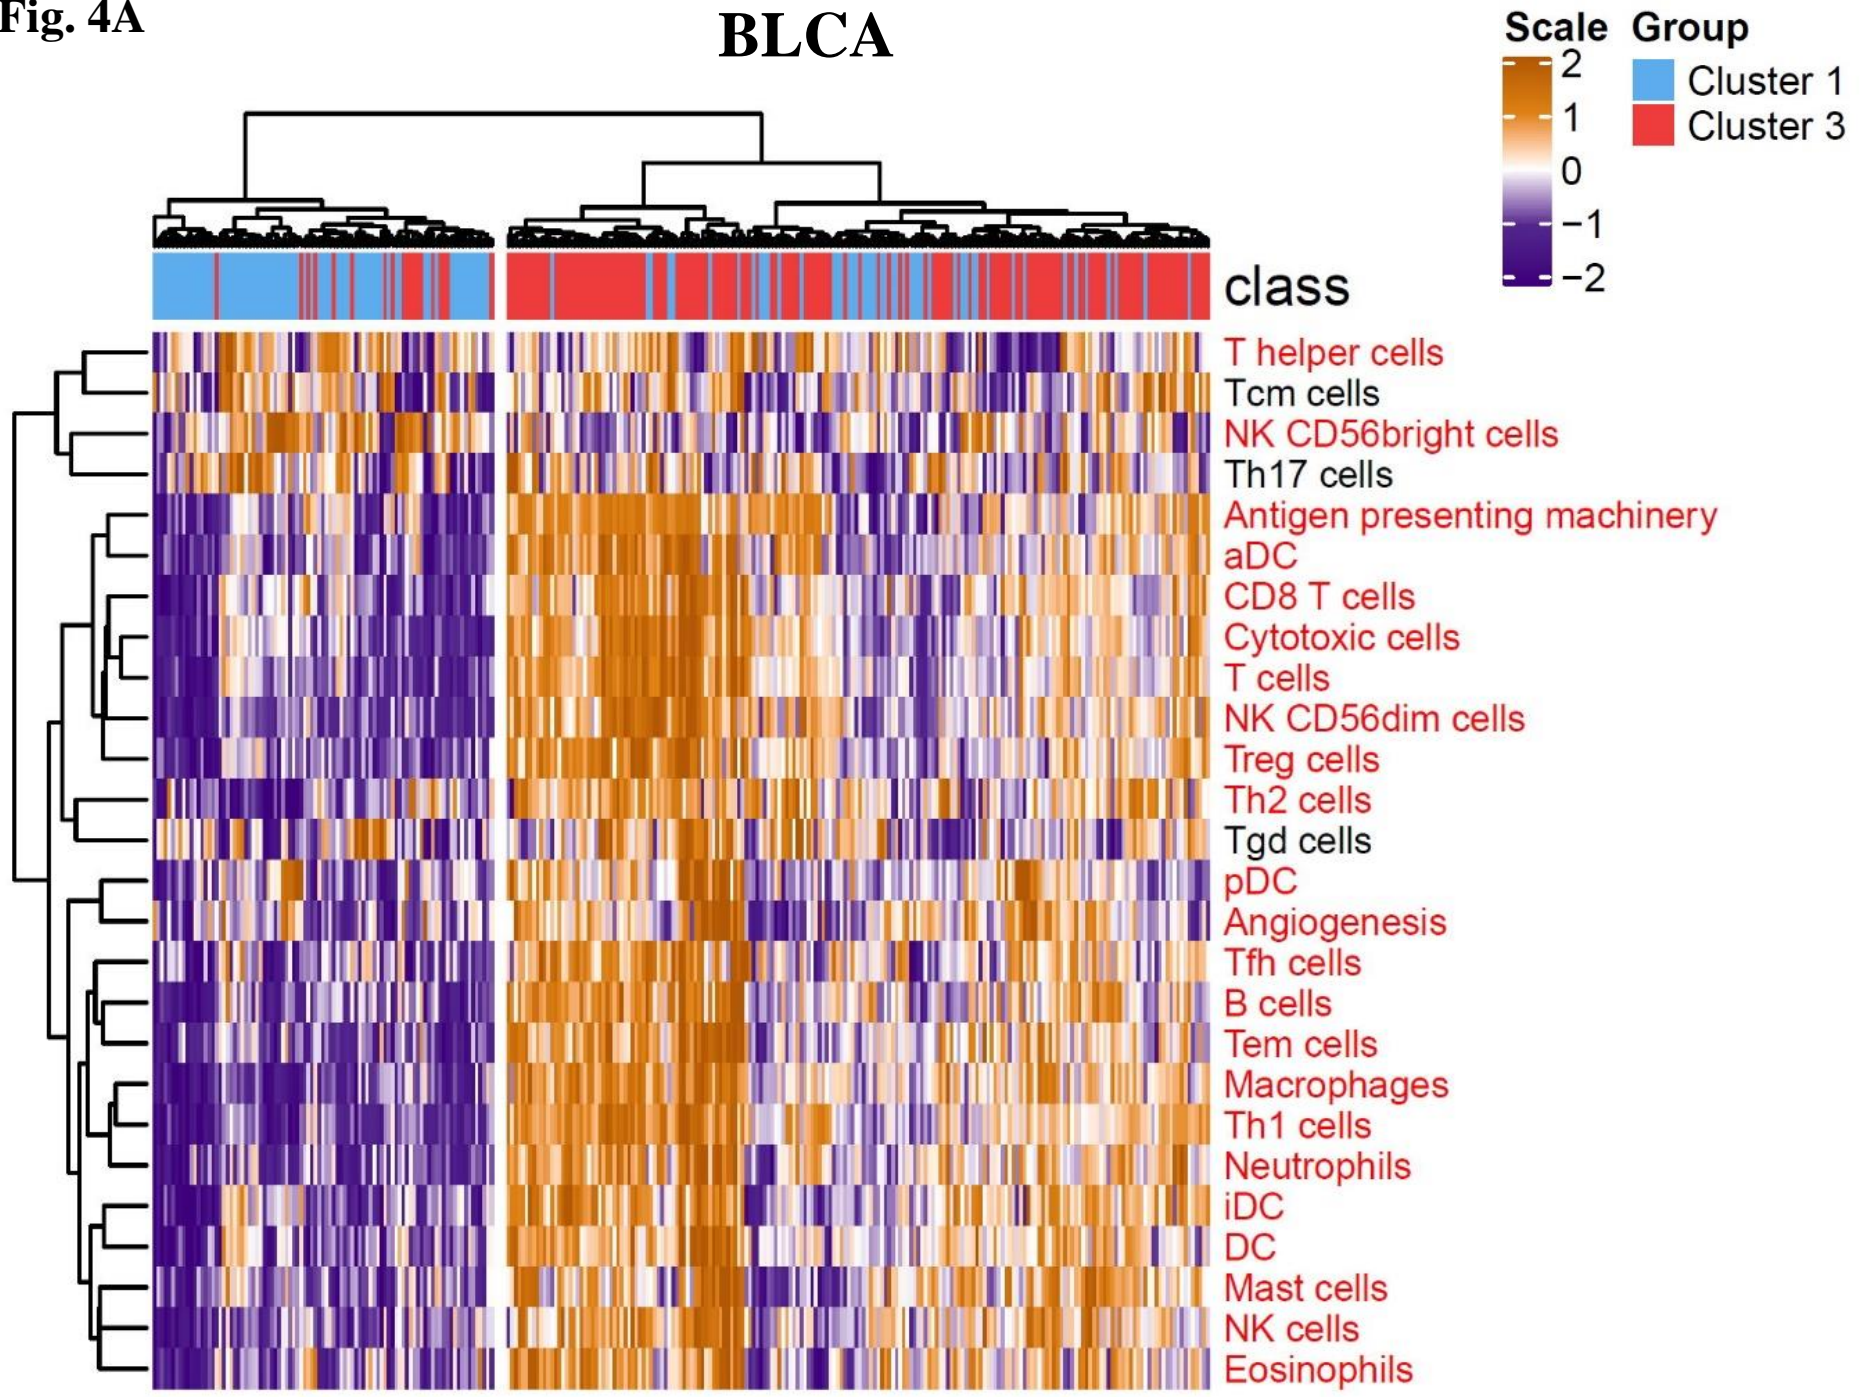

Fig. 4A

# LGG

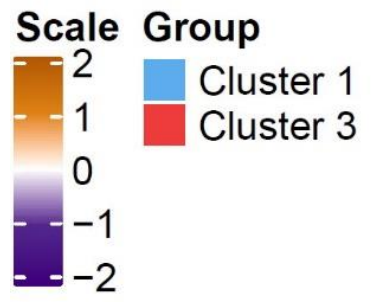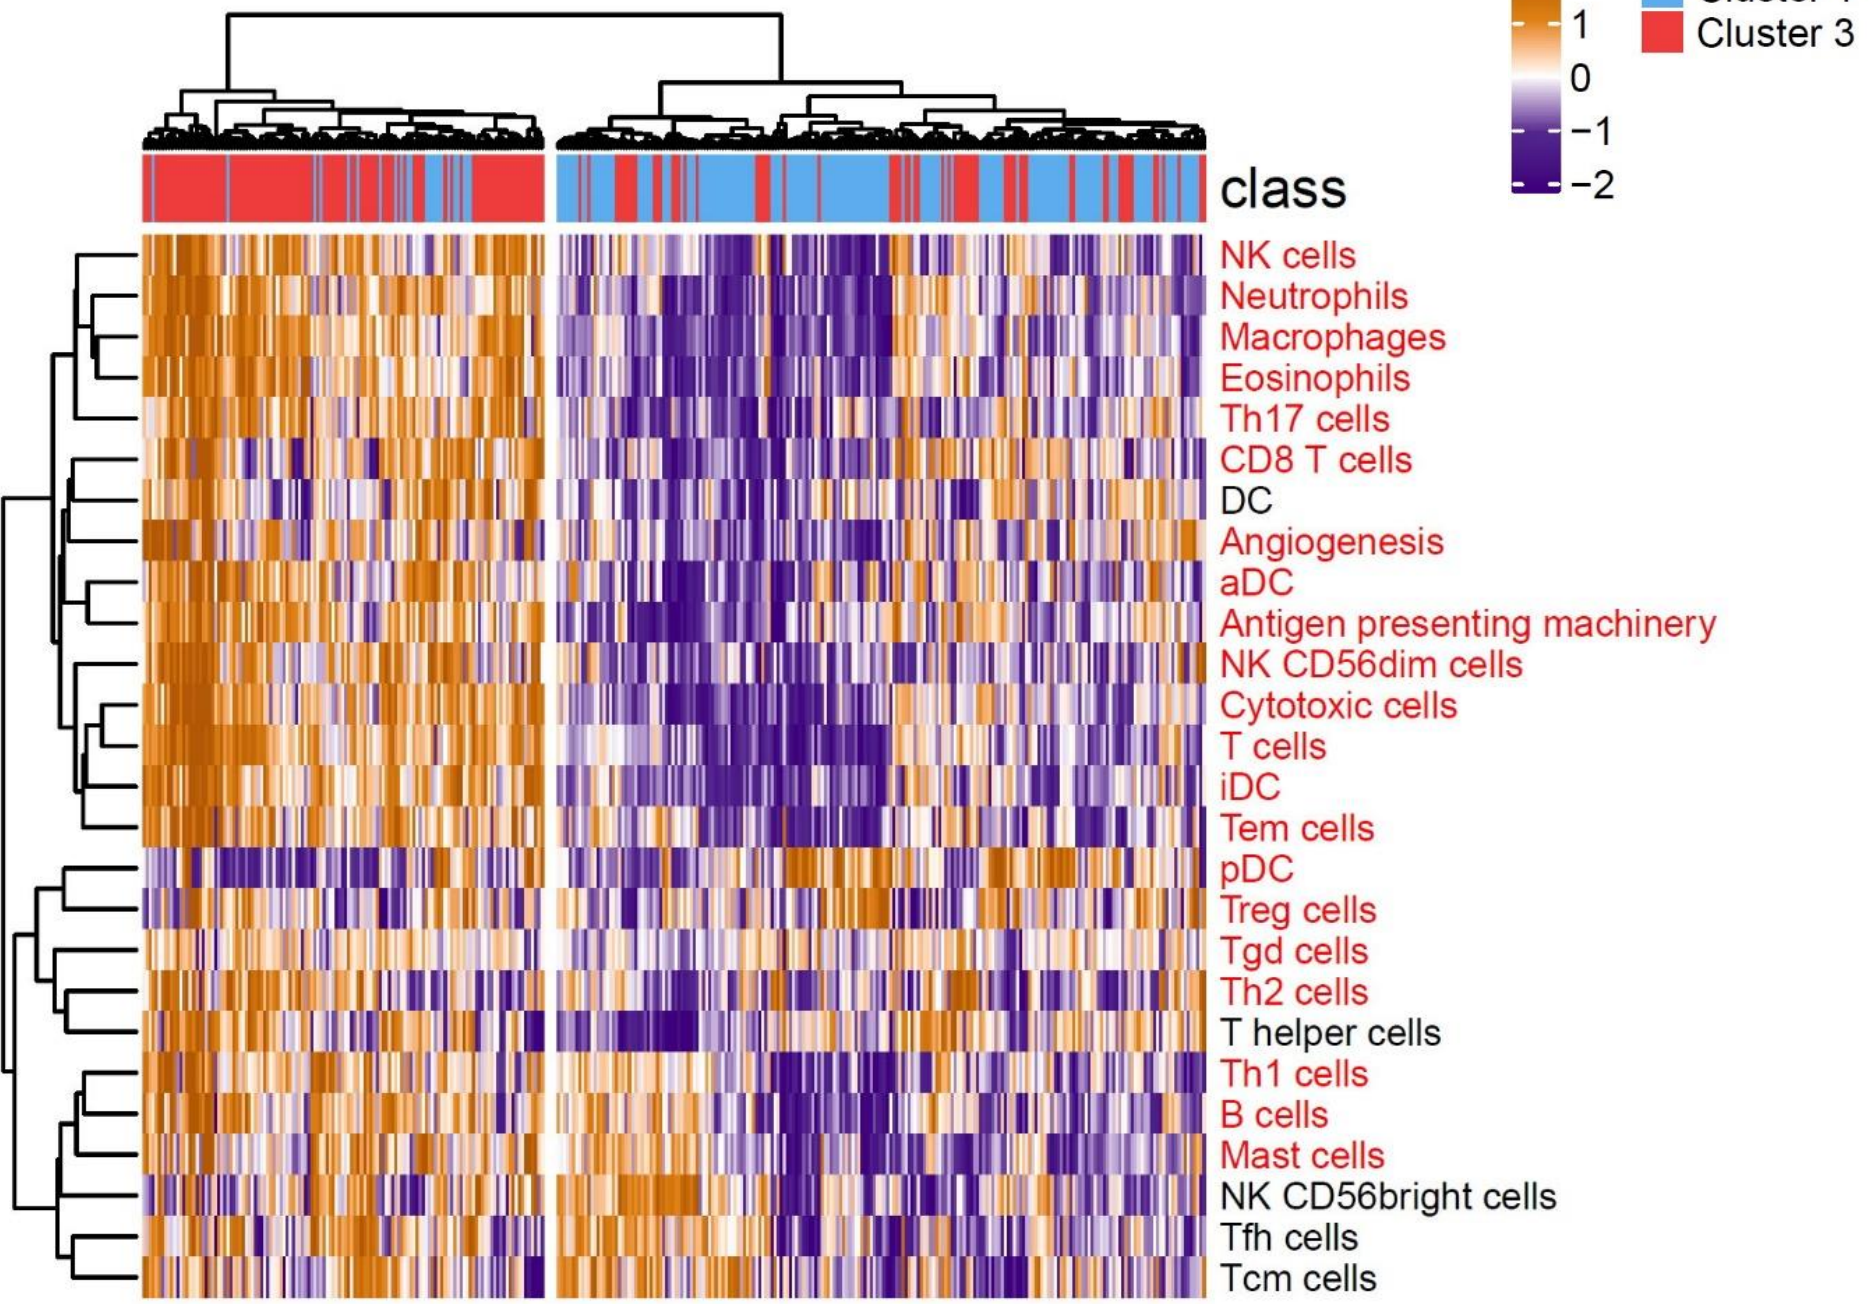



Fig. 4A

# MESO

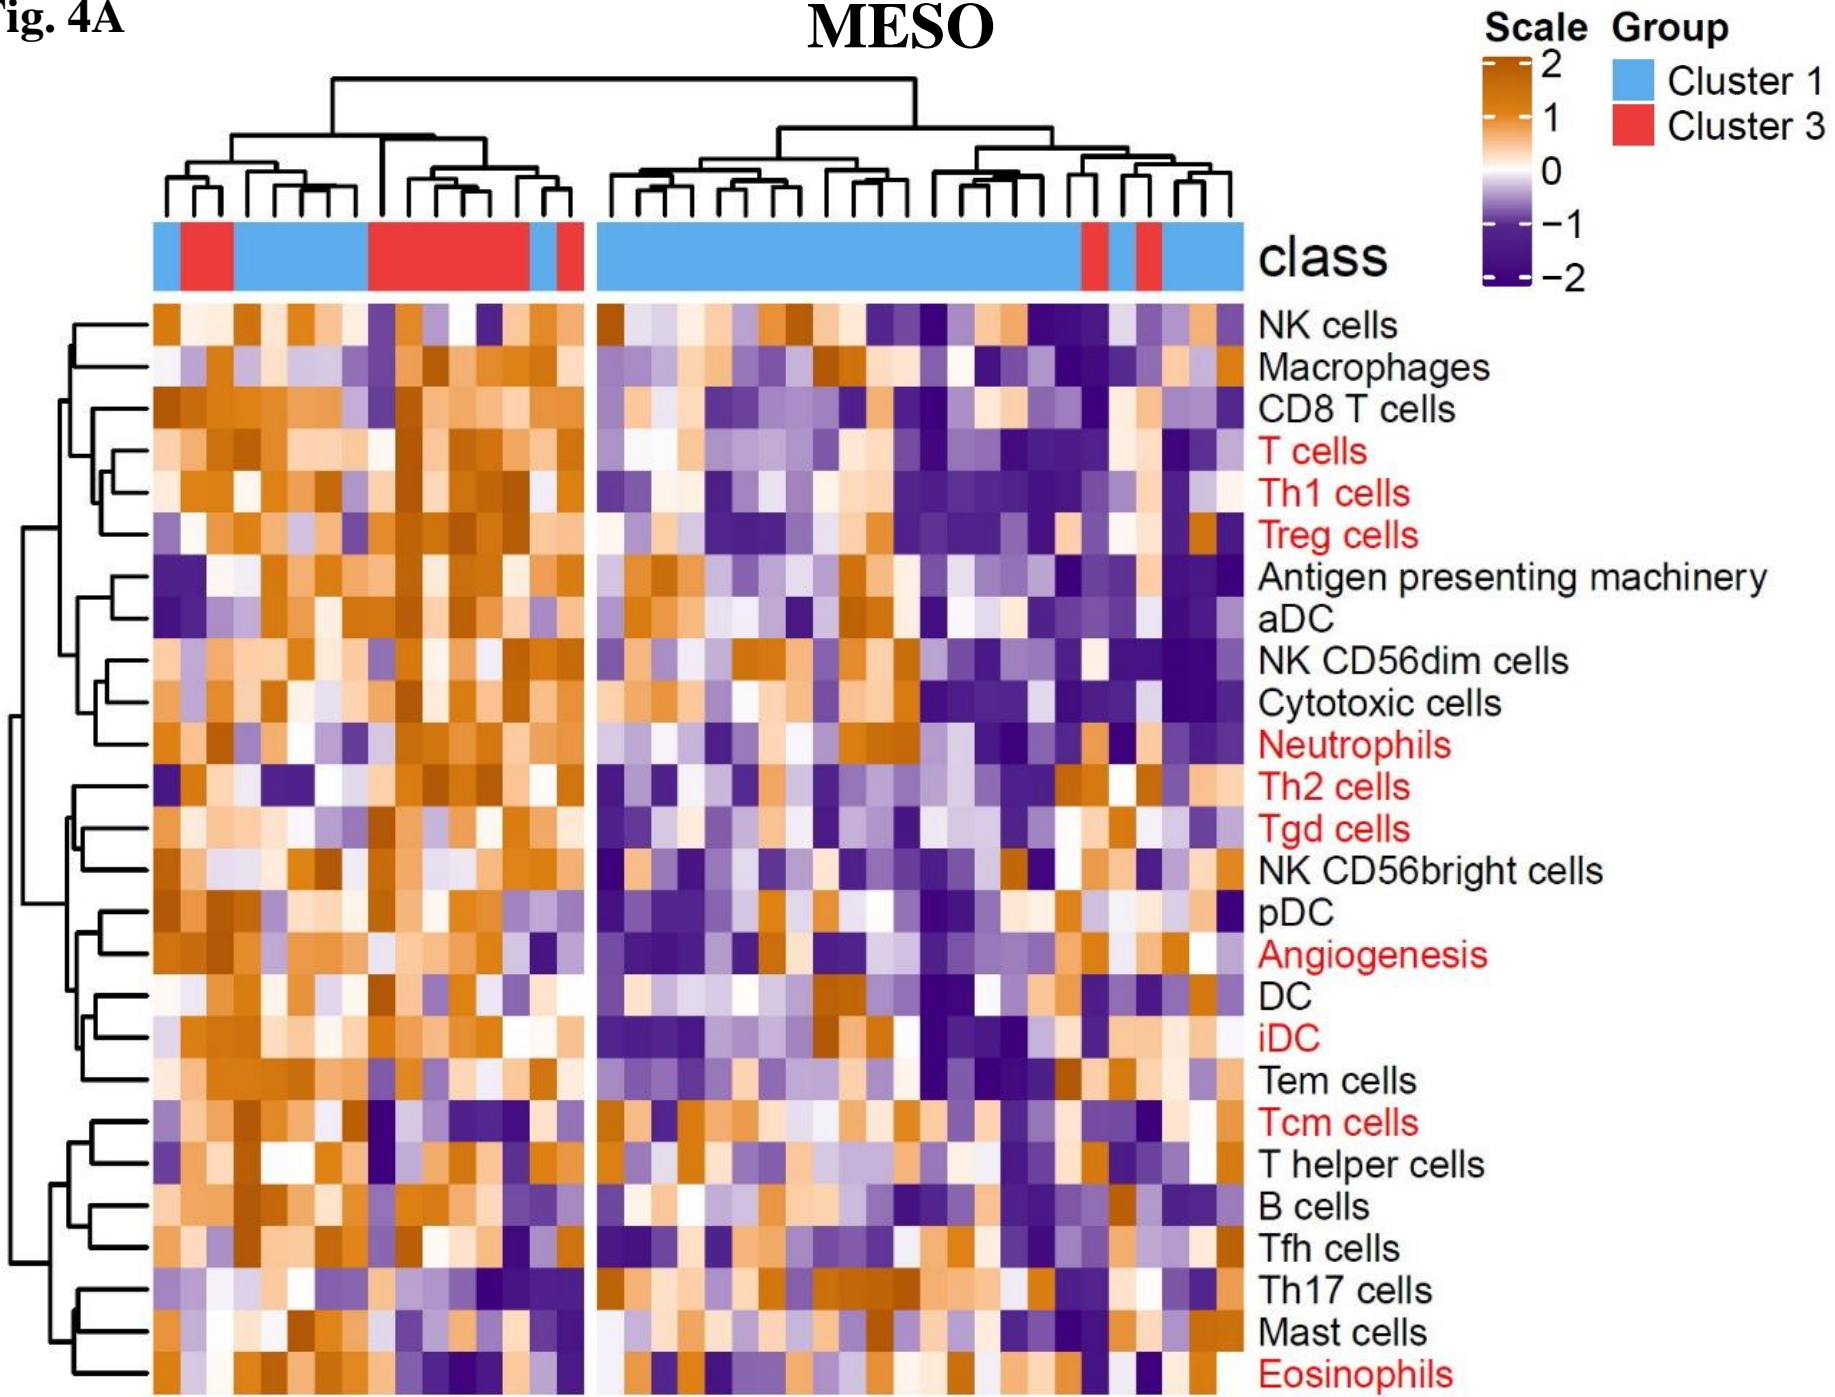



Fig. 4A

# PAAD

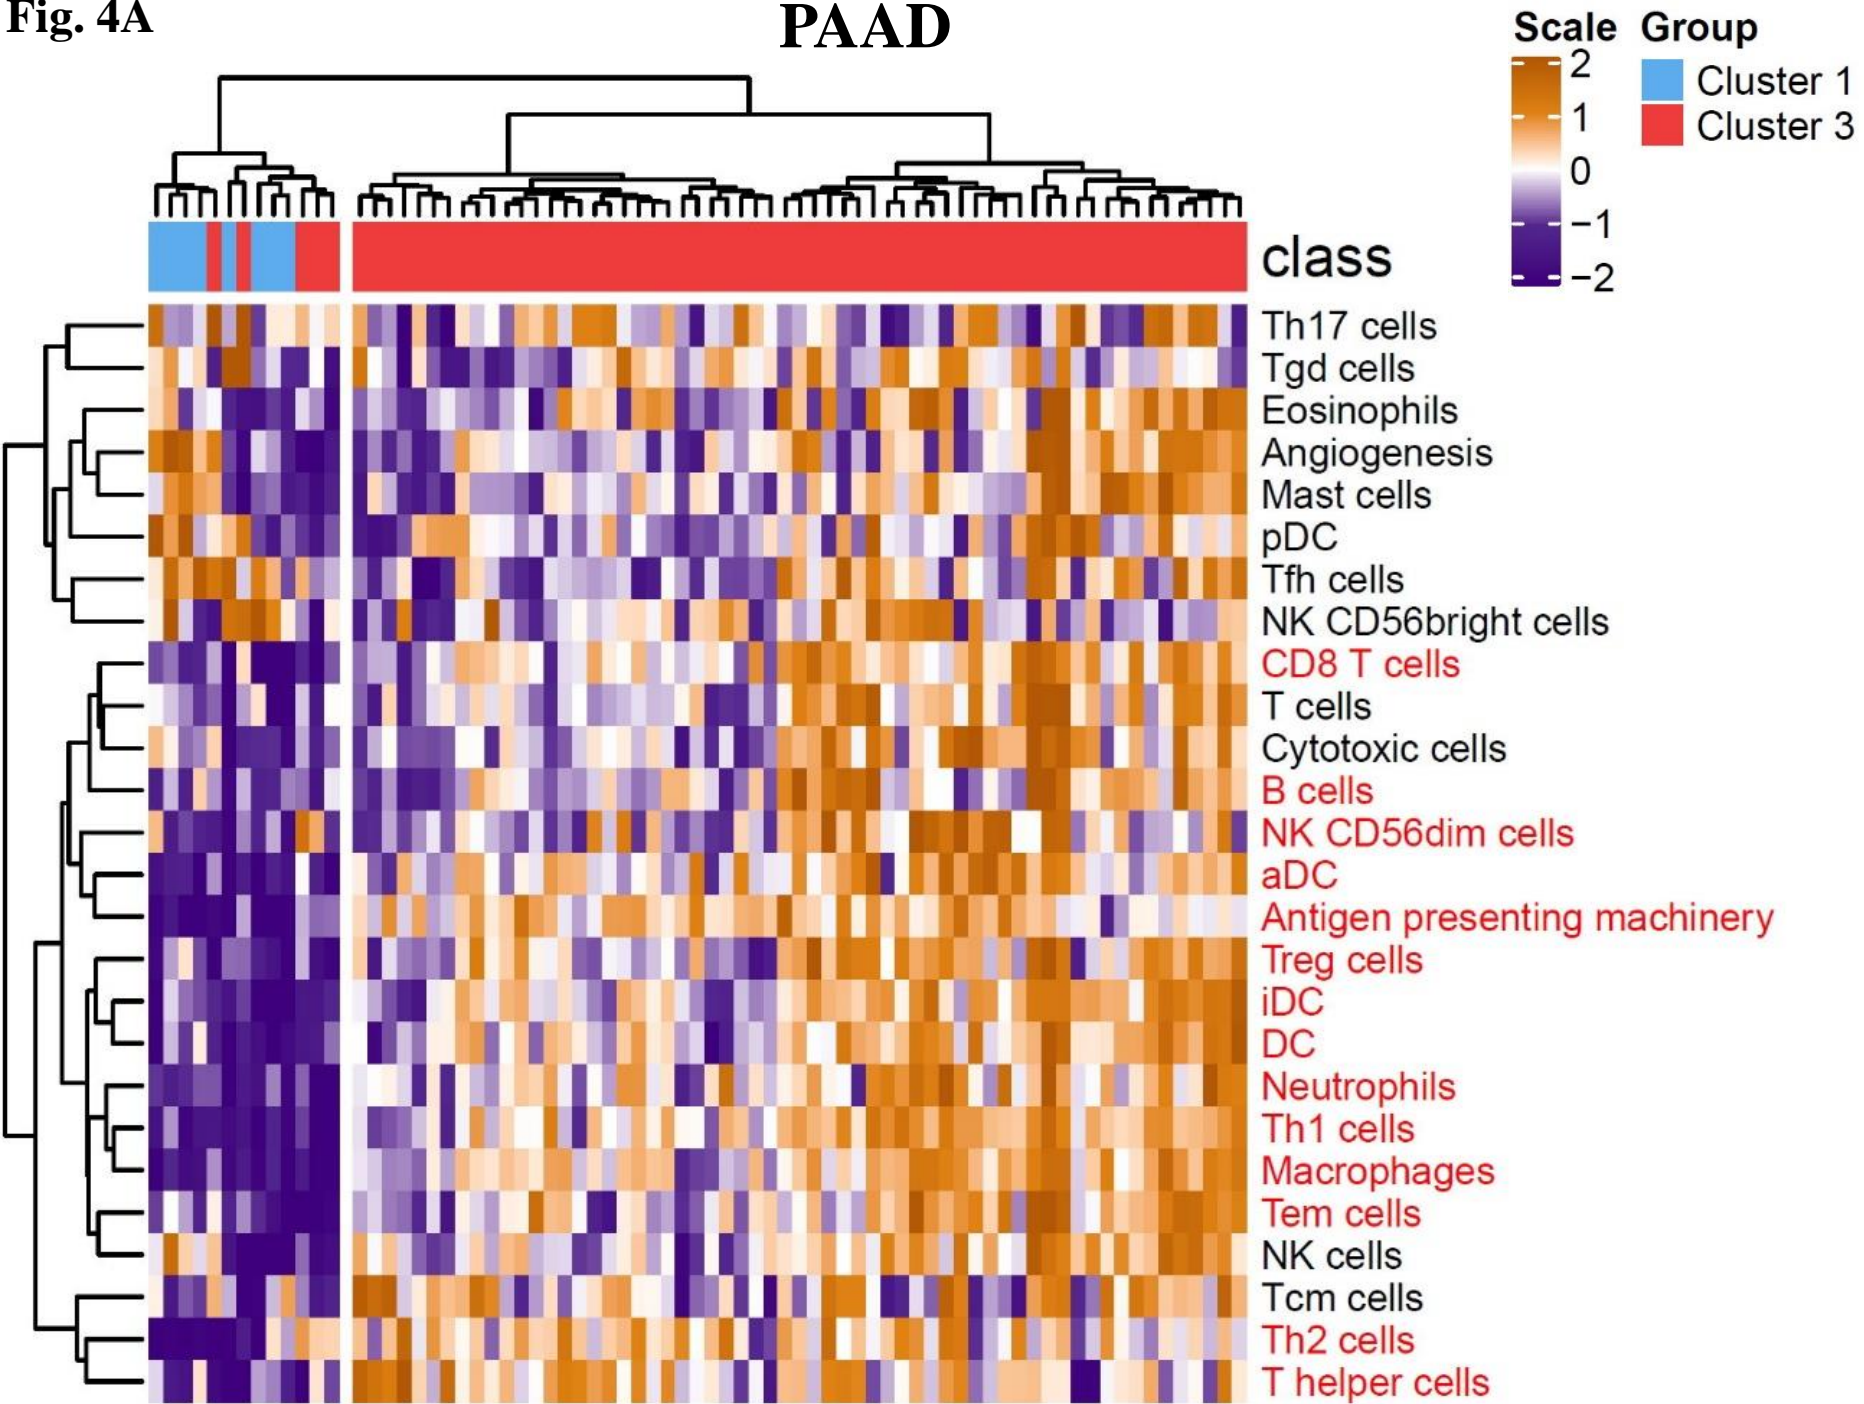

Fig. 4A

UVM

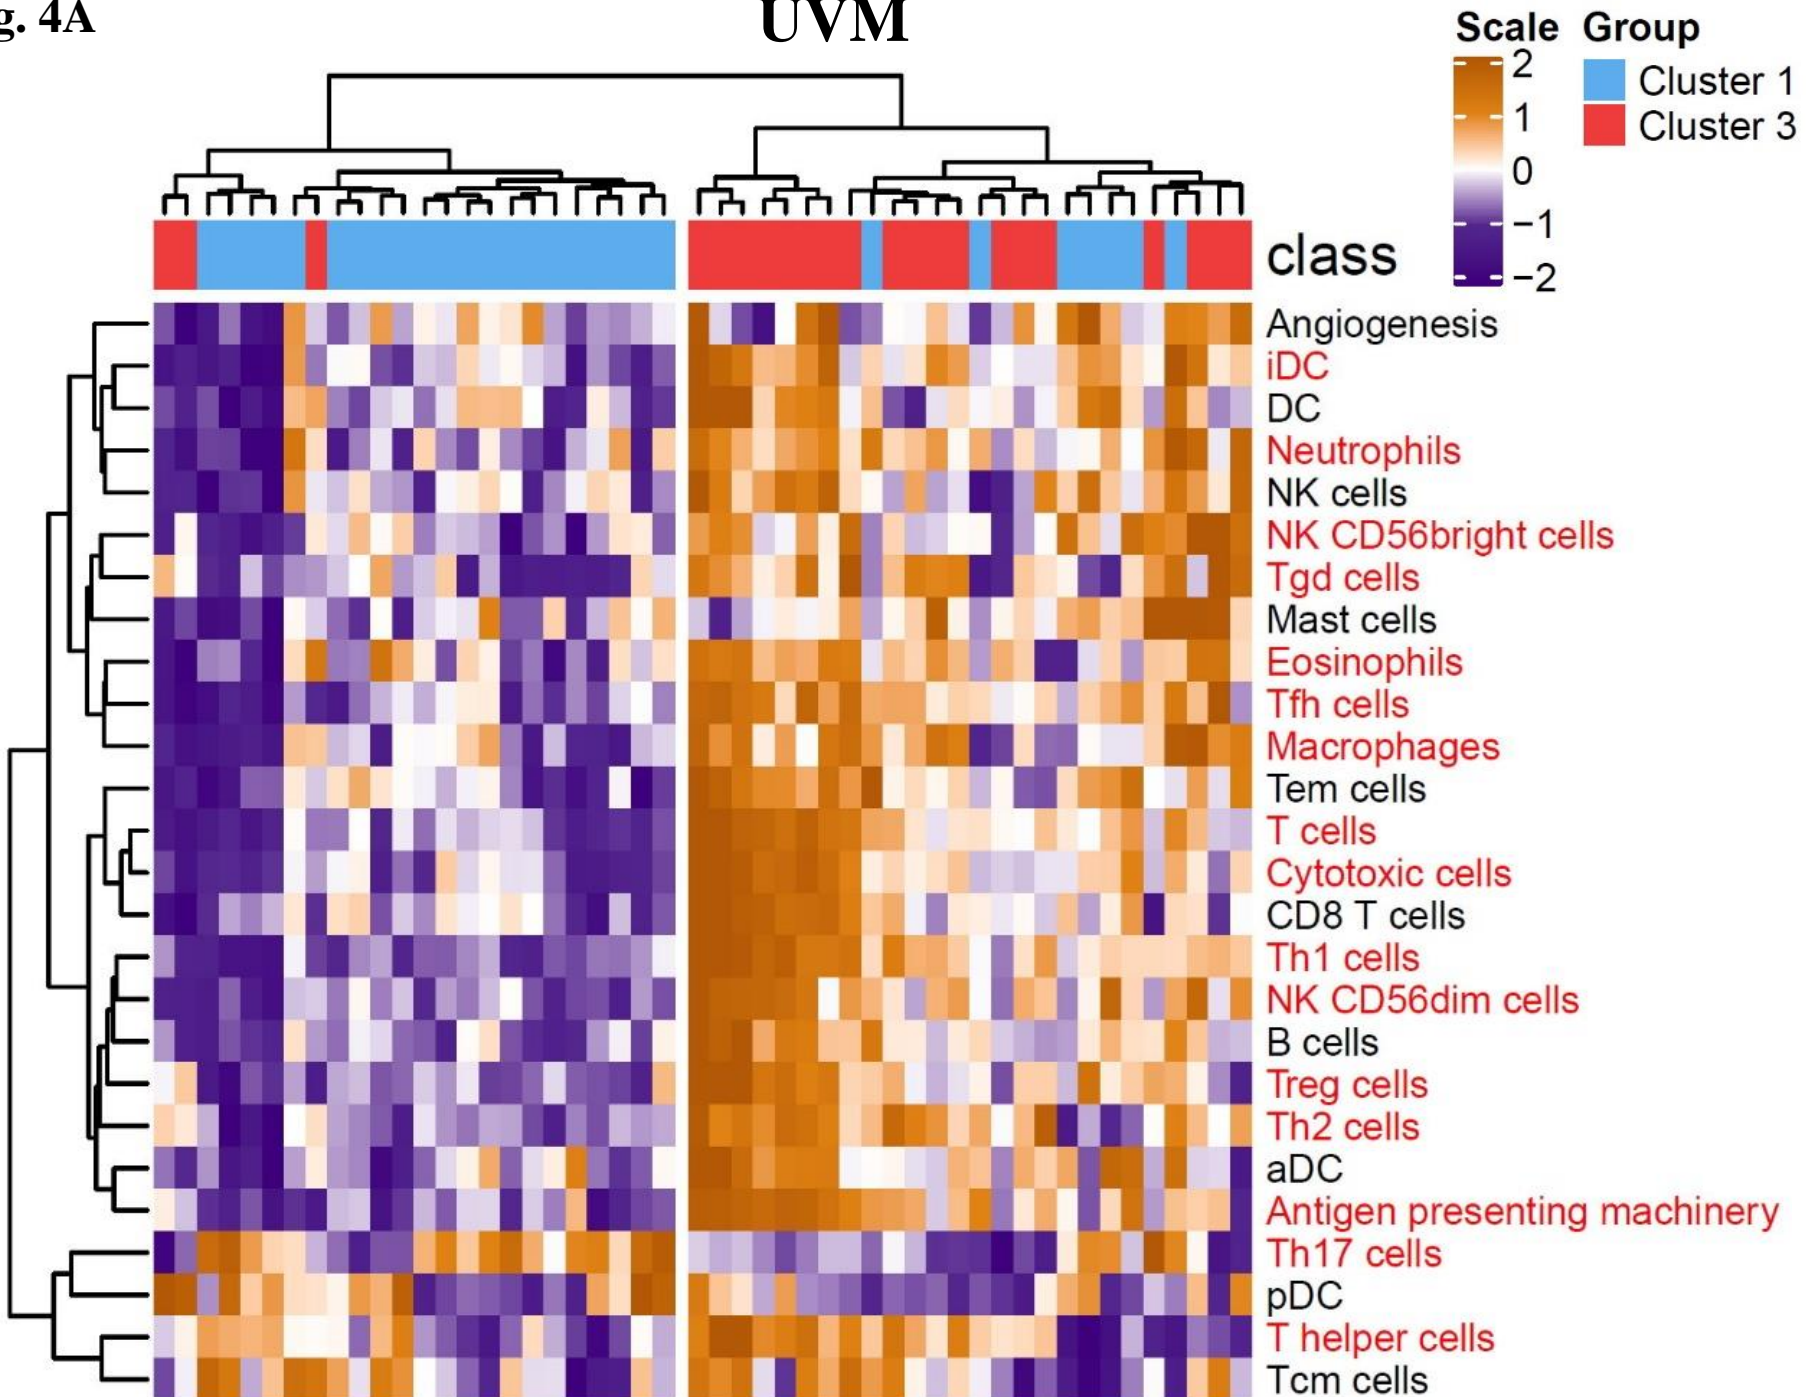

Fig. 4B

# BLCA

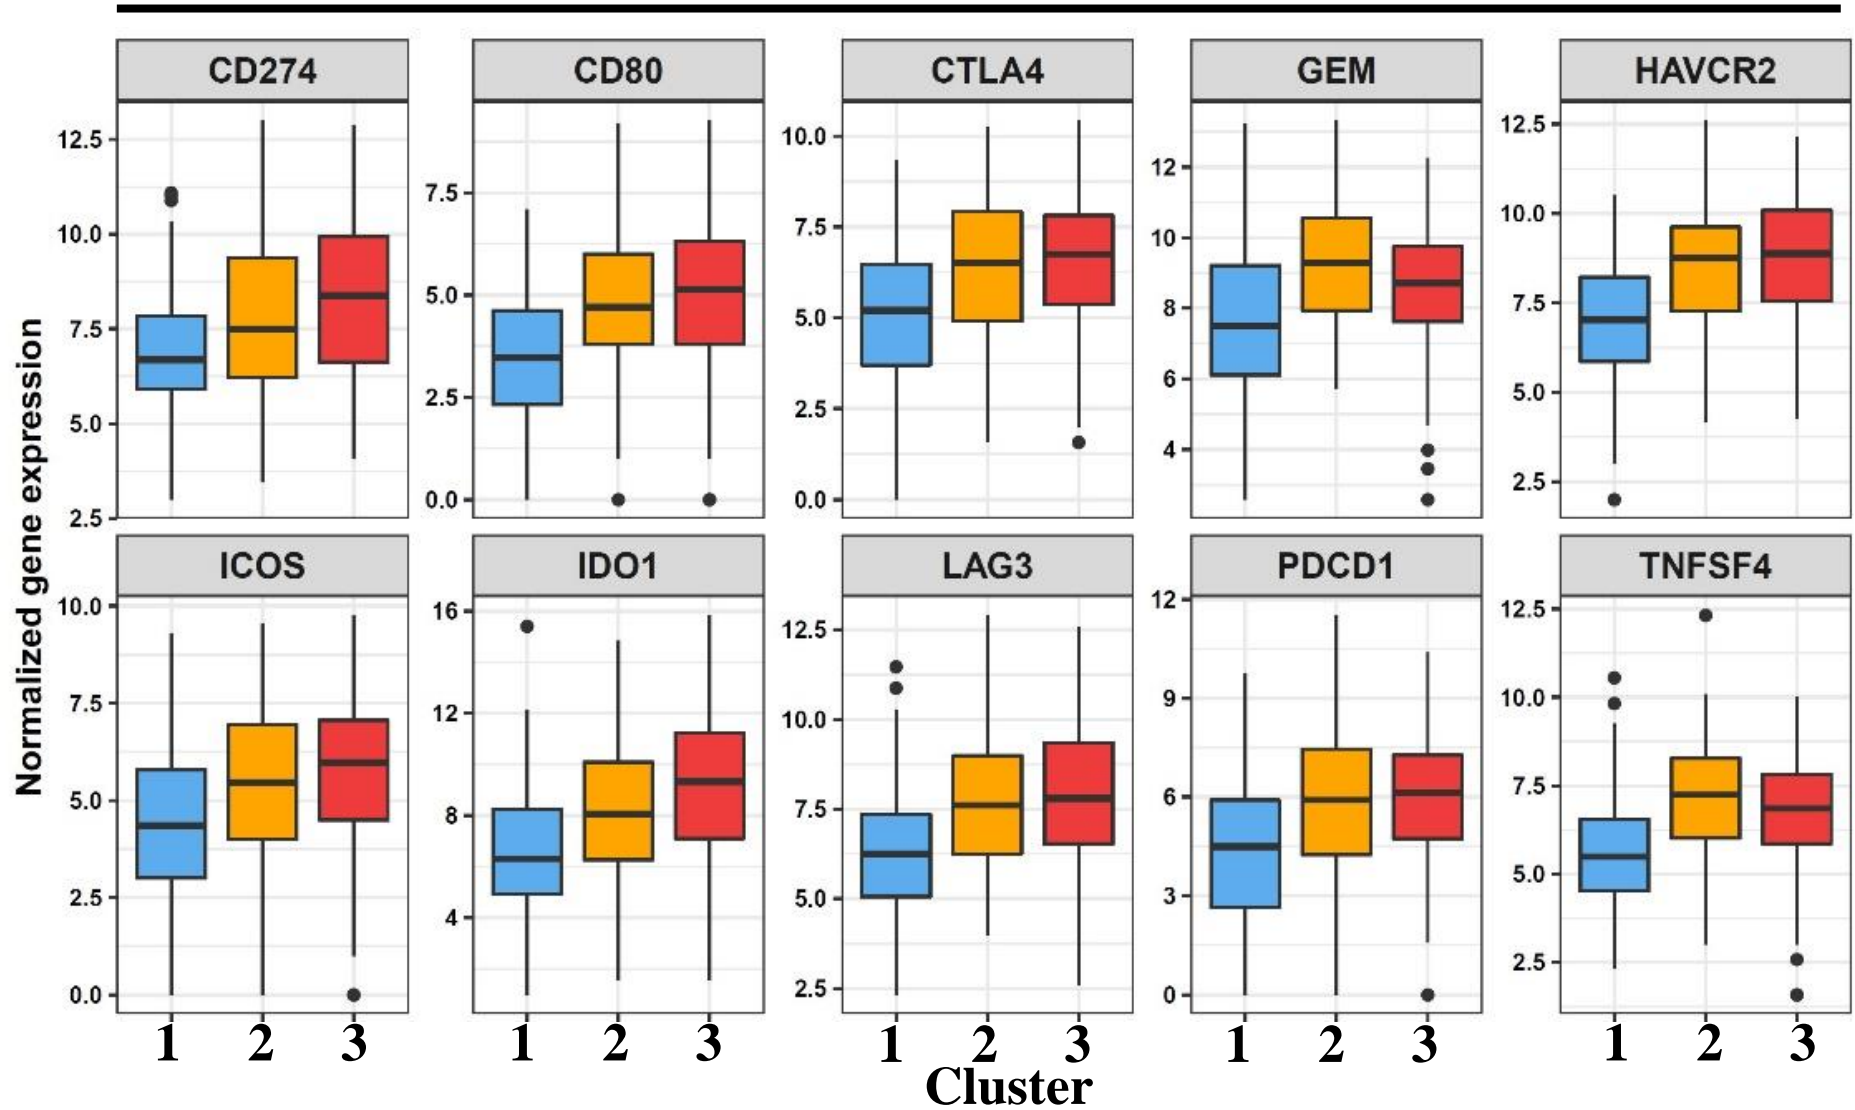

Fig. 4B

# LGG

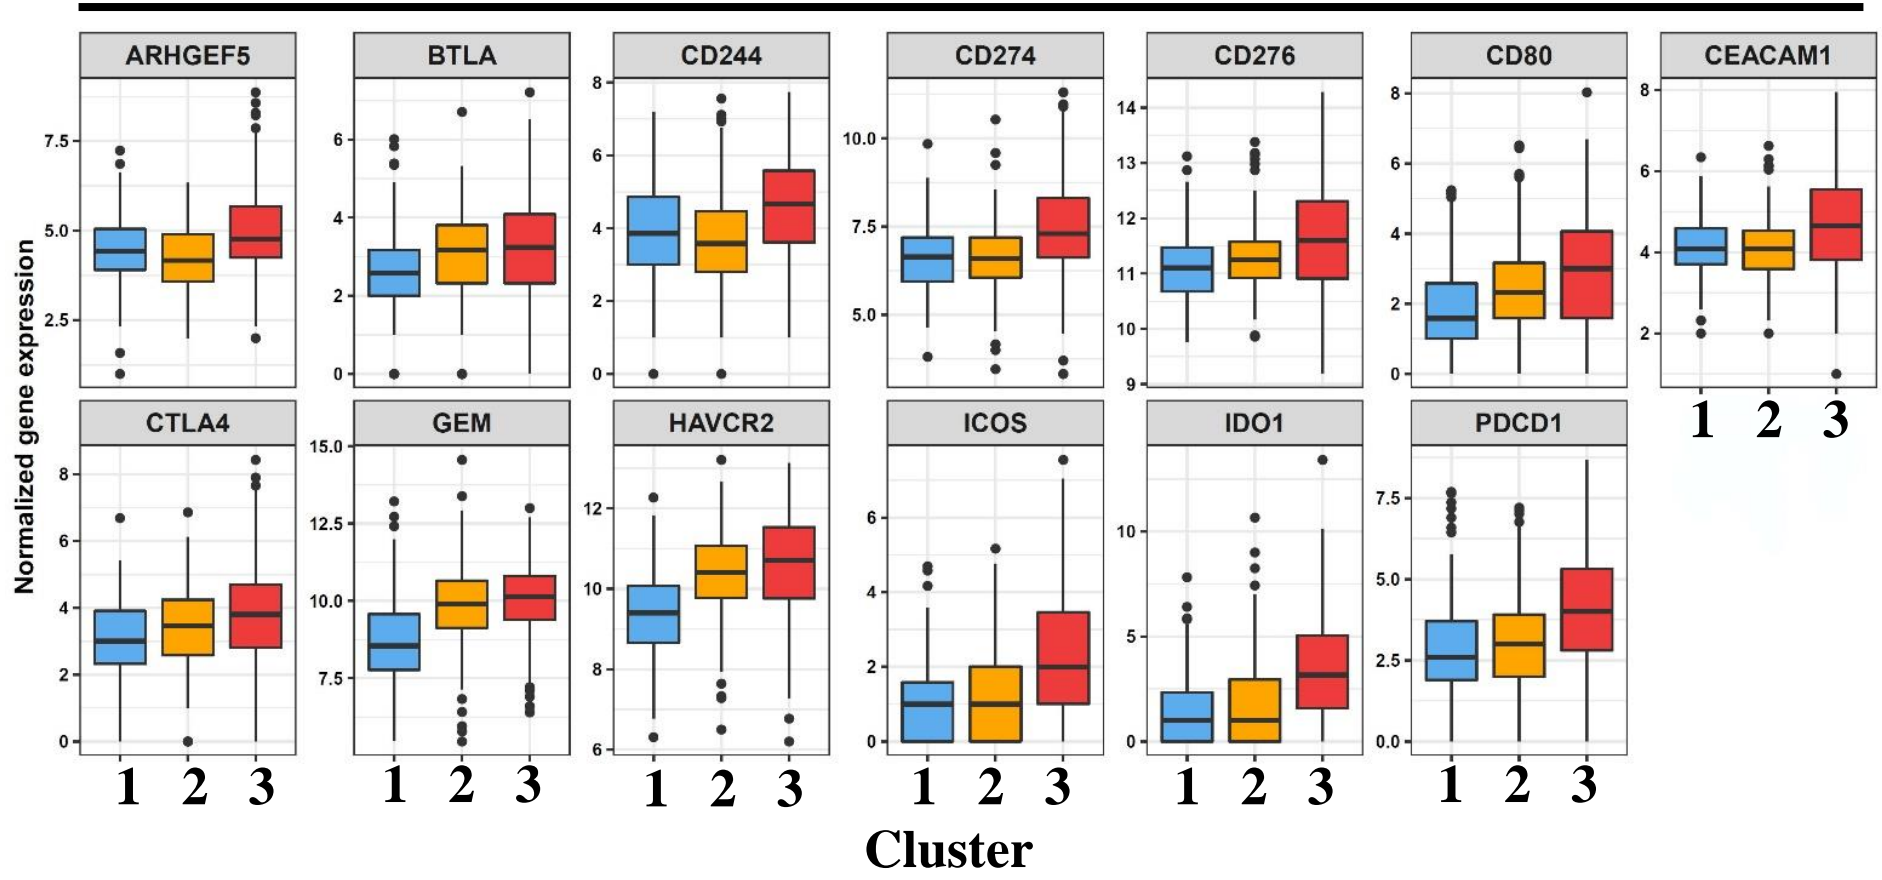



Fig. 4B

# MESO

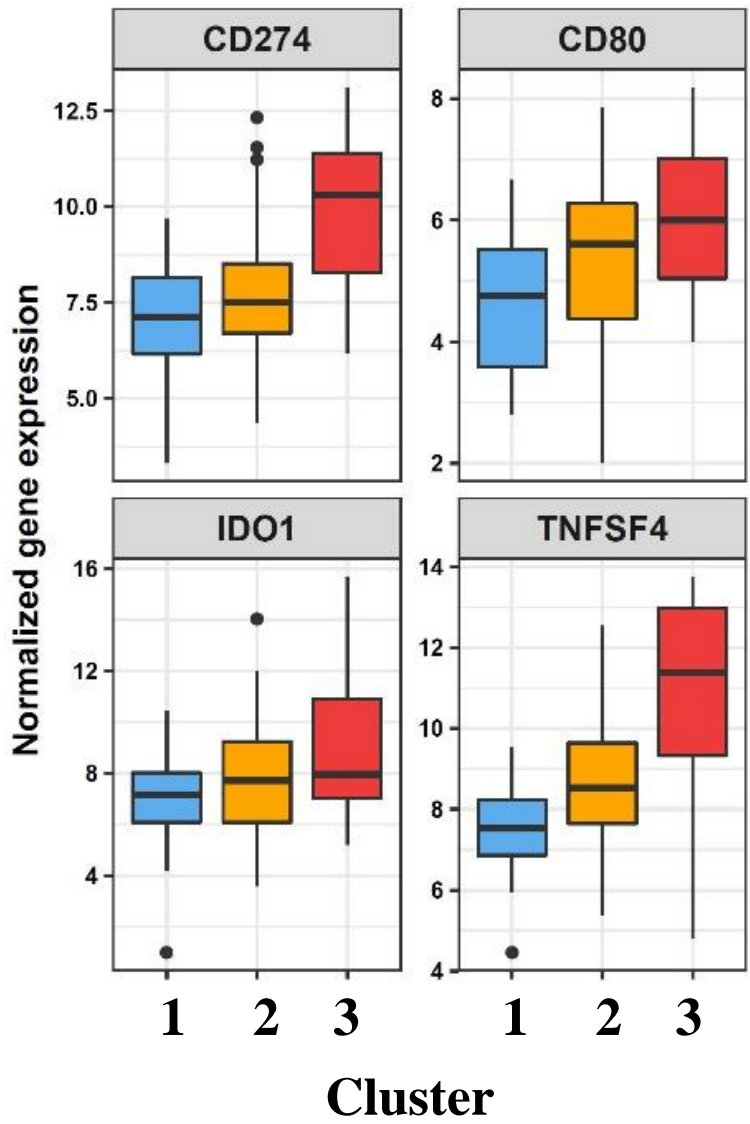

Fig. 4B

# PAAD

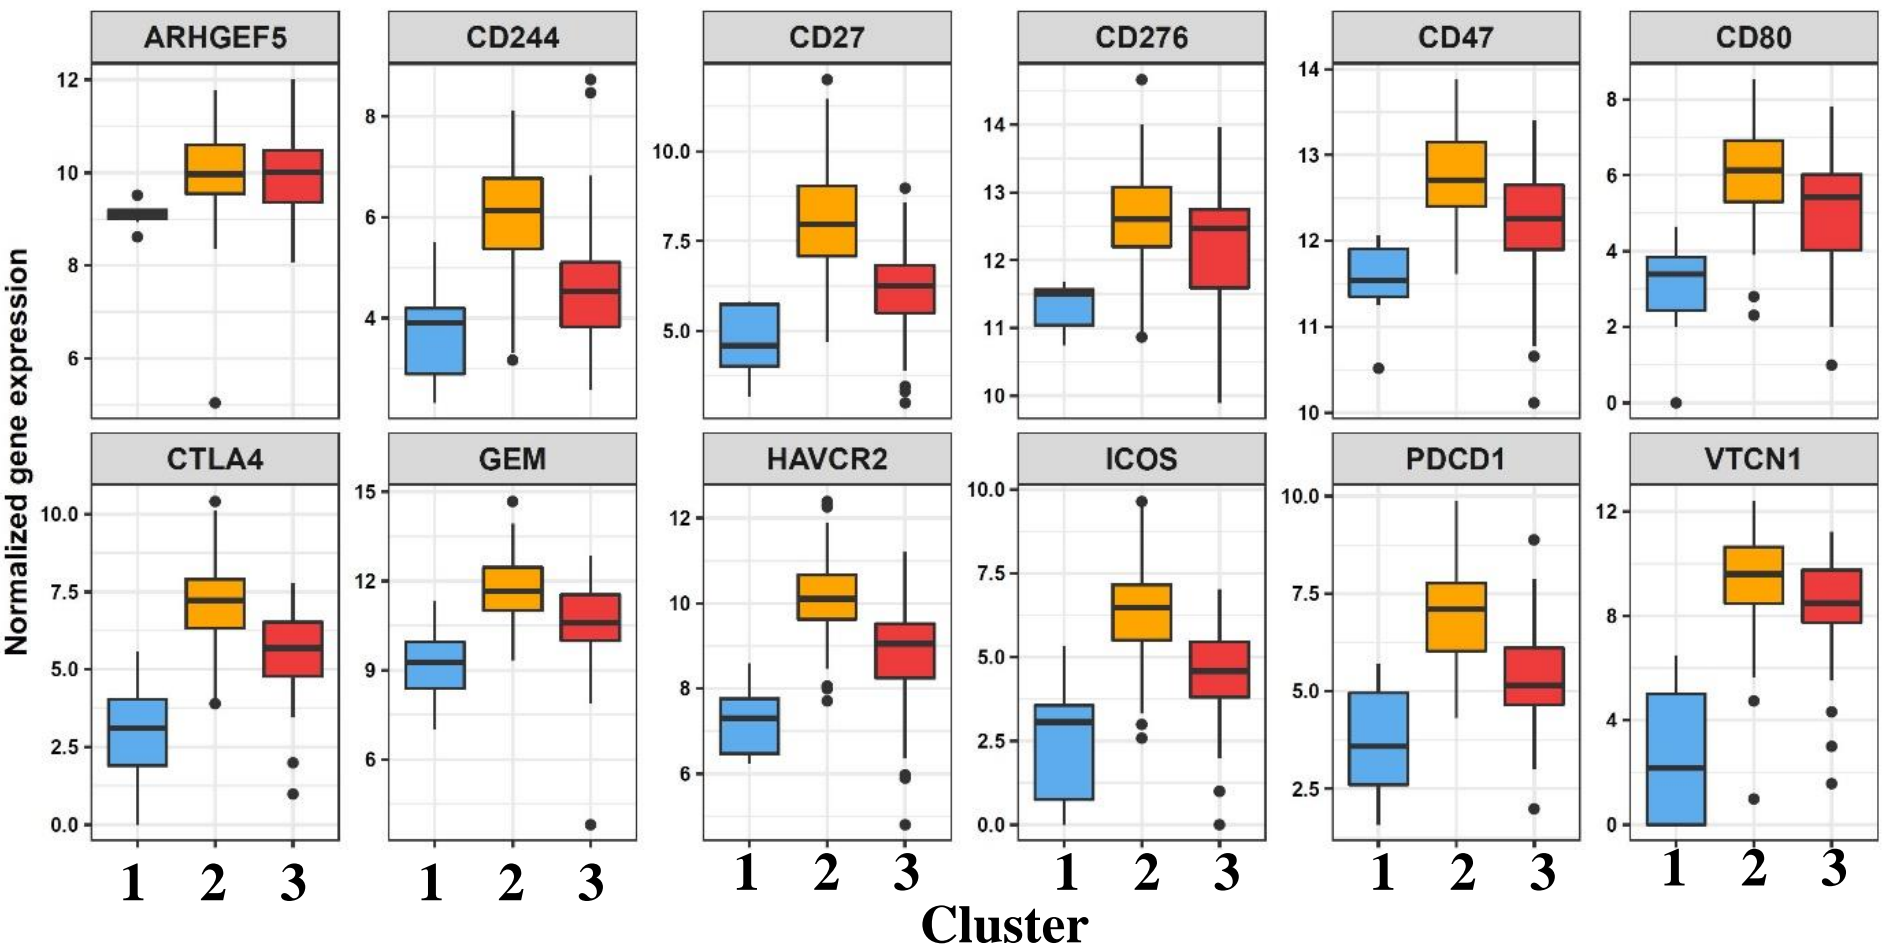

**Fig. 4B**

# UVM

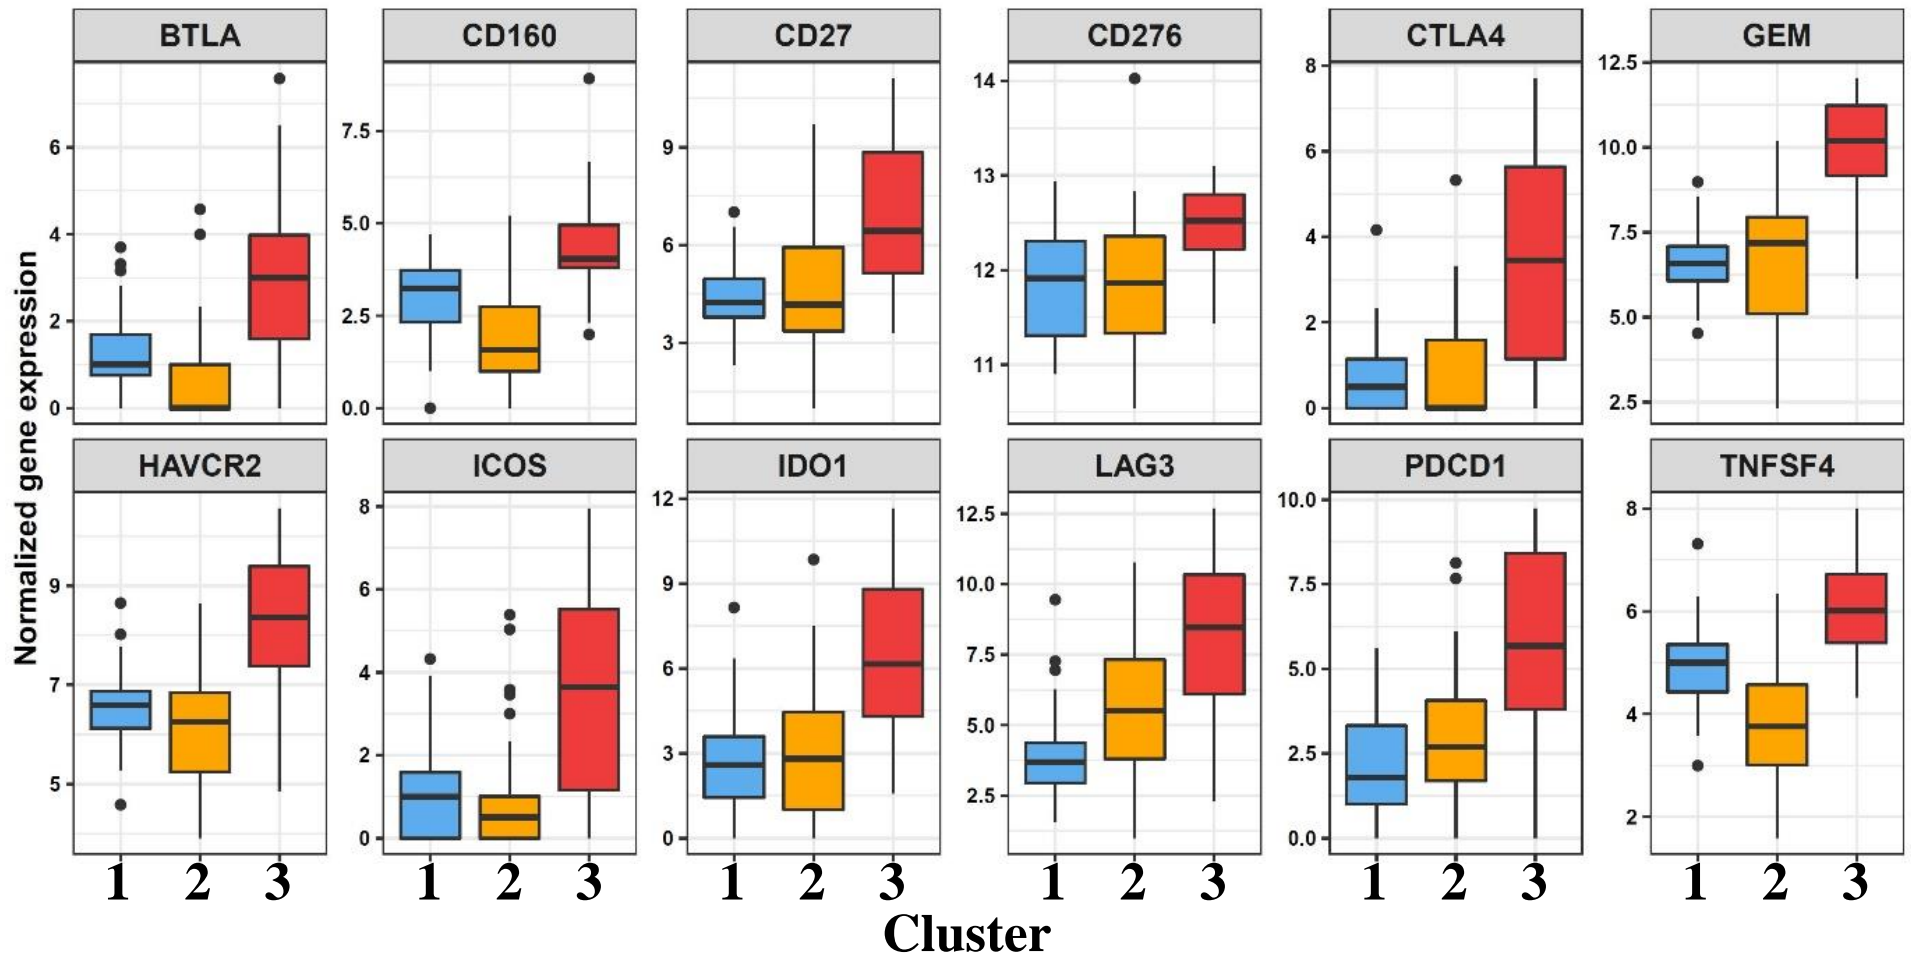

**Fig. 4C**

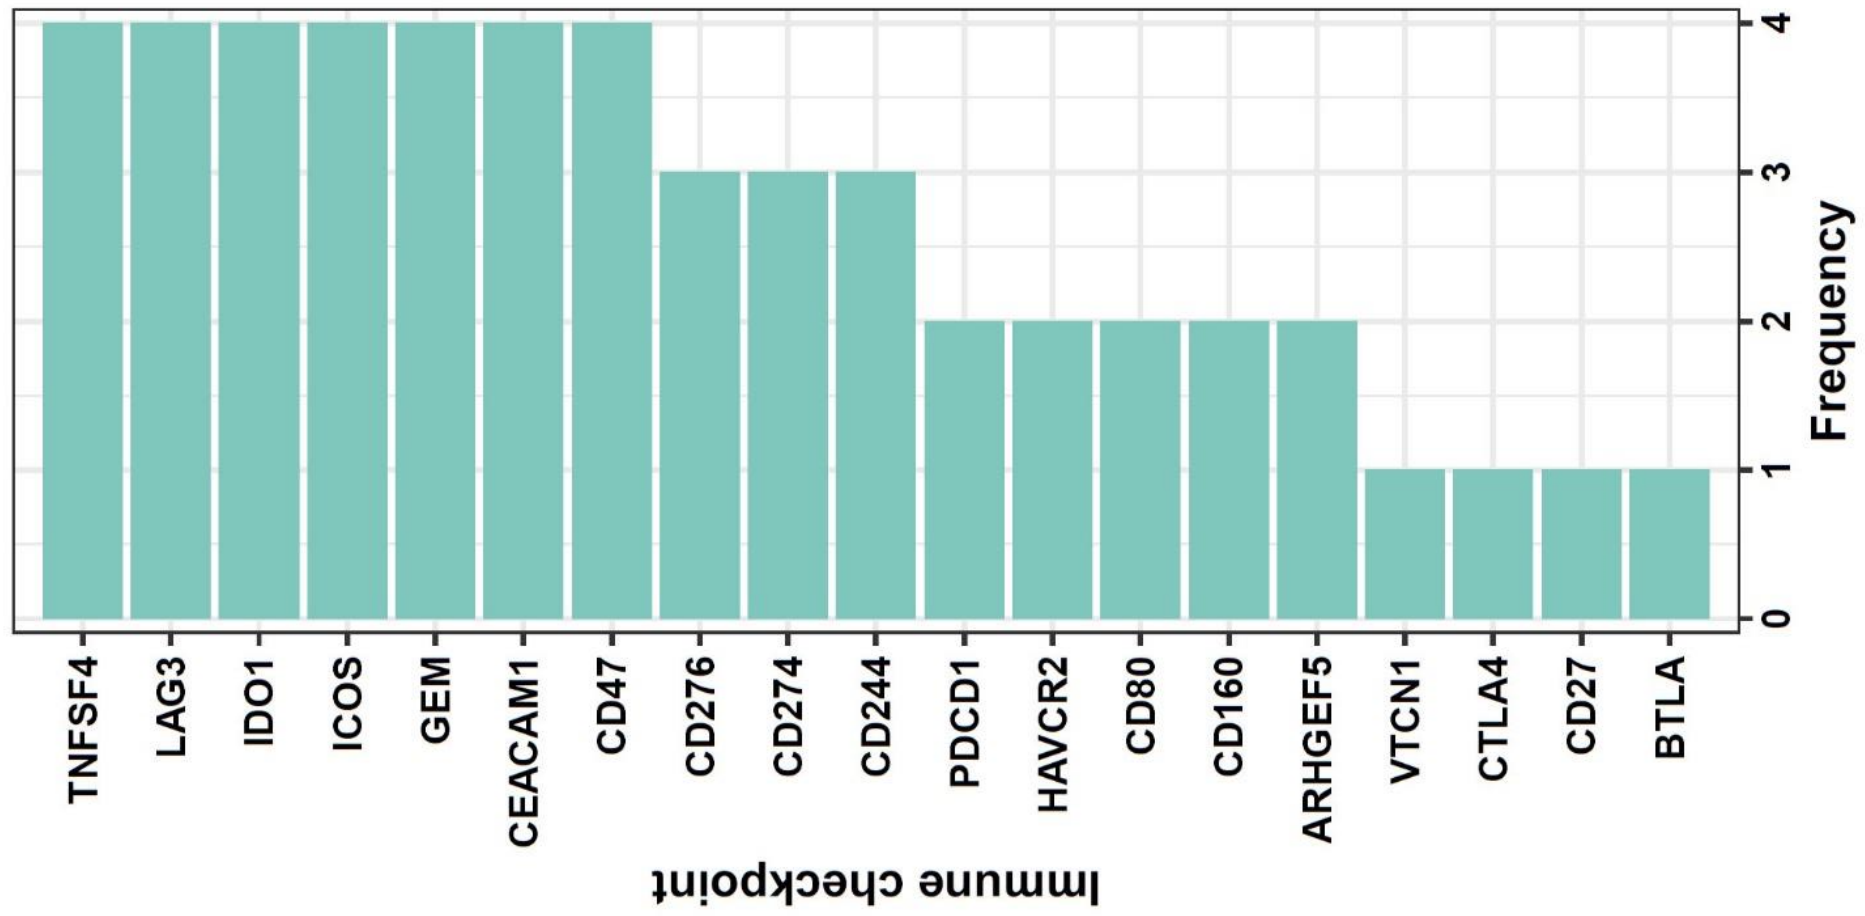



**Fig. 5A**

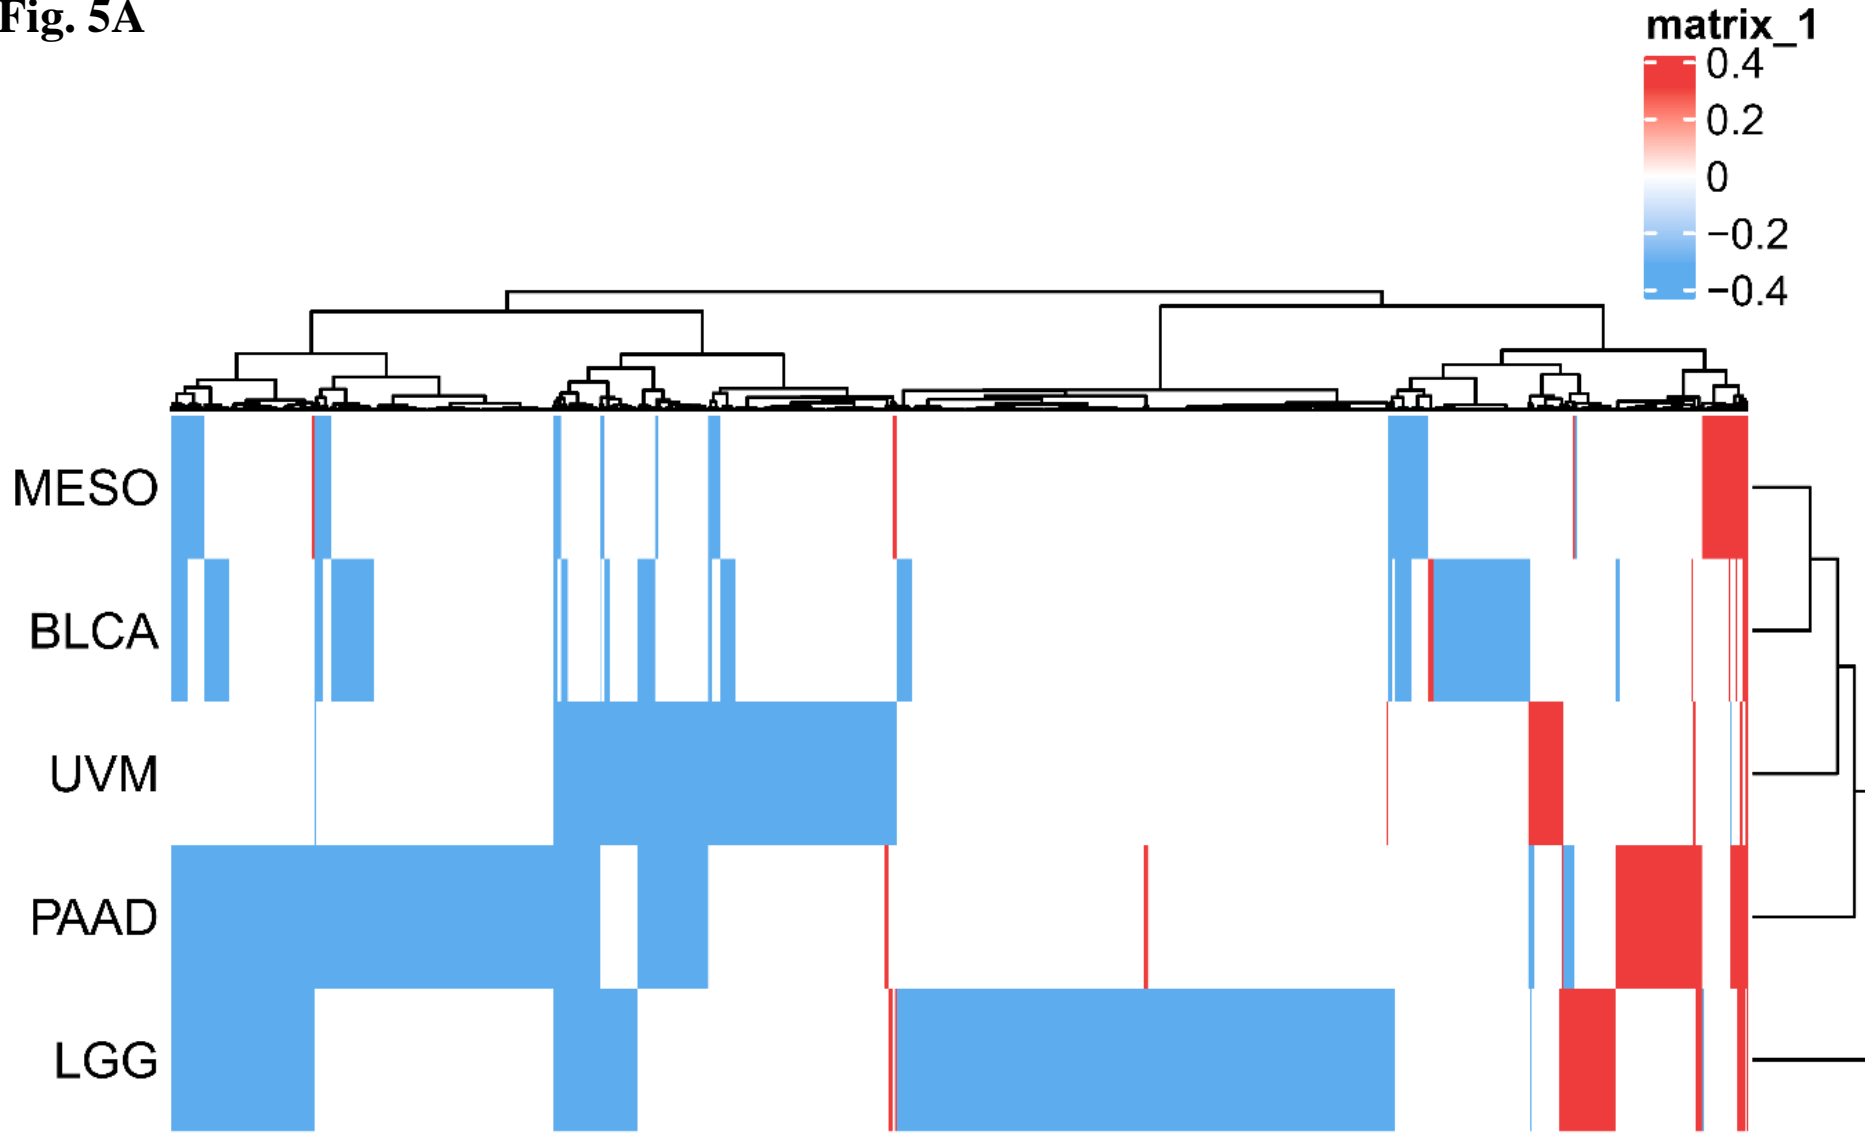

Fig. 5B

AC026401.3

MIR4435-2HG

AP001273.1

SMIM25 AC084018.1

AC011477.2

CYTOR

RNF213-AS1

BCDIN3D-AS1

AC084824.4

AC095057.3

GABPB1-AS1

AL021368.2

PPP1R14B-AS1

SEC24B-AS1

ACVR2B-AS1

ILF3-DT

AL391834.2

AC020917.4

AC012467.2

AC026471.4

AC092117.1

AC093227.1

SNHG20

SGMS1-AS1

AC104825.1

AC139768.1

AC110285.2

AC007292.1

LINC00641

DICER1-AS1

AL355574.1

AL021707.2

AC009812.1

AC107027.3

AL662795.2

AC004803.1

ZNF529-AS1

SH3BP5-AS1

LINC01089

PAXBP1-AS1

AC005332.4

AC007066.2

VASH1-AS1

MIR3936HG

ALOX12-AS1

KTN1-AS1

WDFY3-AS2

BOLA3-AS1

EPB41L4A-AS1

AC008969.1

TPT1-AS1

CCNT2-AS1

AL596202.1

AC025159.1

AF131215.6

AC022107.1

AL157392.3

SATB1-AS1

PDCD4-AS1

CCDC39

C21orf62-AS1

AL354892.2

AC037459.2

AC087854.1

AP001486.2

AL117339.4

PVT1

KLF3-AS1

OSER1-DT

AL512625.1

LINC02593

TMEM147-AS1

AL513534.2

RPARP-AS1

AC012513.3

Z95115.1

AC024075.1

AC104581.4

AL109811.2

AC009113.1

AL450384.2

LINC00863

AL513550.1

H1FX-AS1

THUMPD3-AS1

AL162586.1

AF131215.5

AL133367.1

SEMA3F-AS1

LINC00667

LINC00653

NKILA

LINC00921

MIR4453HG

AC099778.1

DNAJC3-DT

Z97989.1

TRAF3IP2-AS1

SNHG14

AC245452.1

LINC00852

CCDC183-AS1

STX18-AS1

PSMA3-AS1

AC127024.5

AC018665.1

AC107375.1

AL391684.1

AC019131.2

AC012615.1

SLC25A25-AS1

CKMT2-AS1

AC093010.3

AC022916.1

GLIDR

AC008669.1

ERVK13-1

MIR600HG

NDUFA6-DT

AC083798.2

AL596244.1

AC067750.1

ZNF213-AS1

RAD51-AS1

AC005070.3

AL358472.2

AC007485.2

LINC01137

AC008124.1

AP000766.1

AC060780.1

AC245060.5

AL445524.1

AC078846.1

CEBPB-AS1

AC093673.1

LINC00346

value

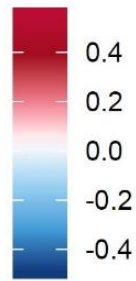

Freq

- 3
- a 4
- a 5

Fig. 5C

# BLCA

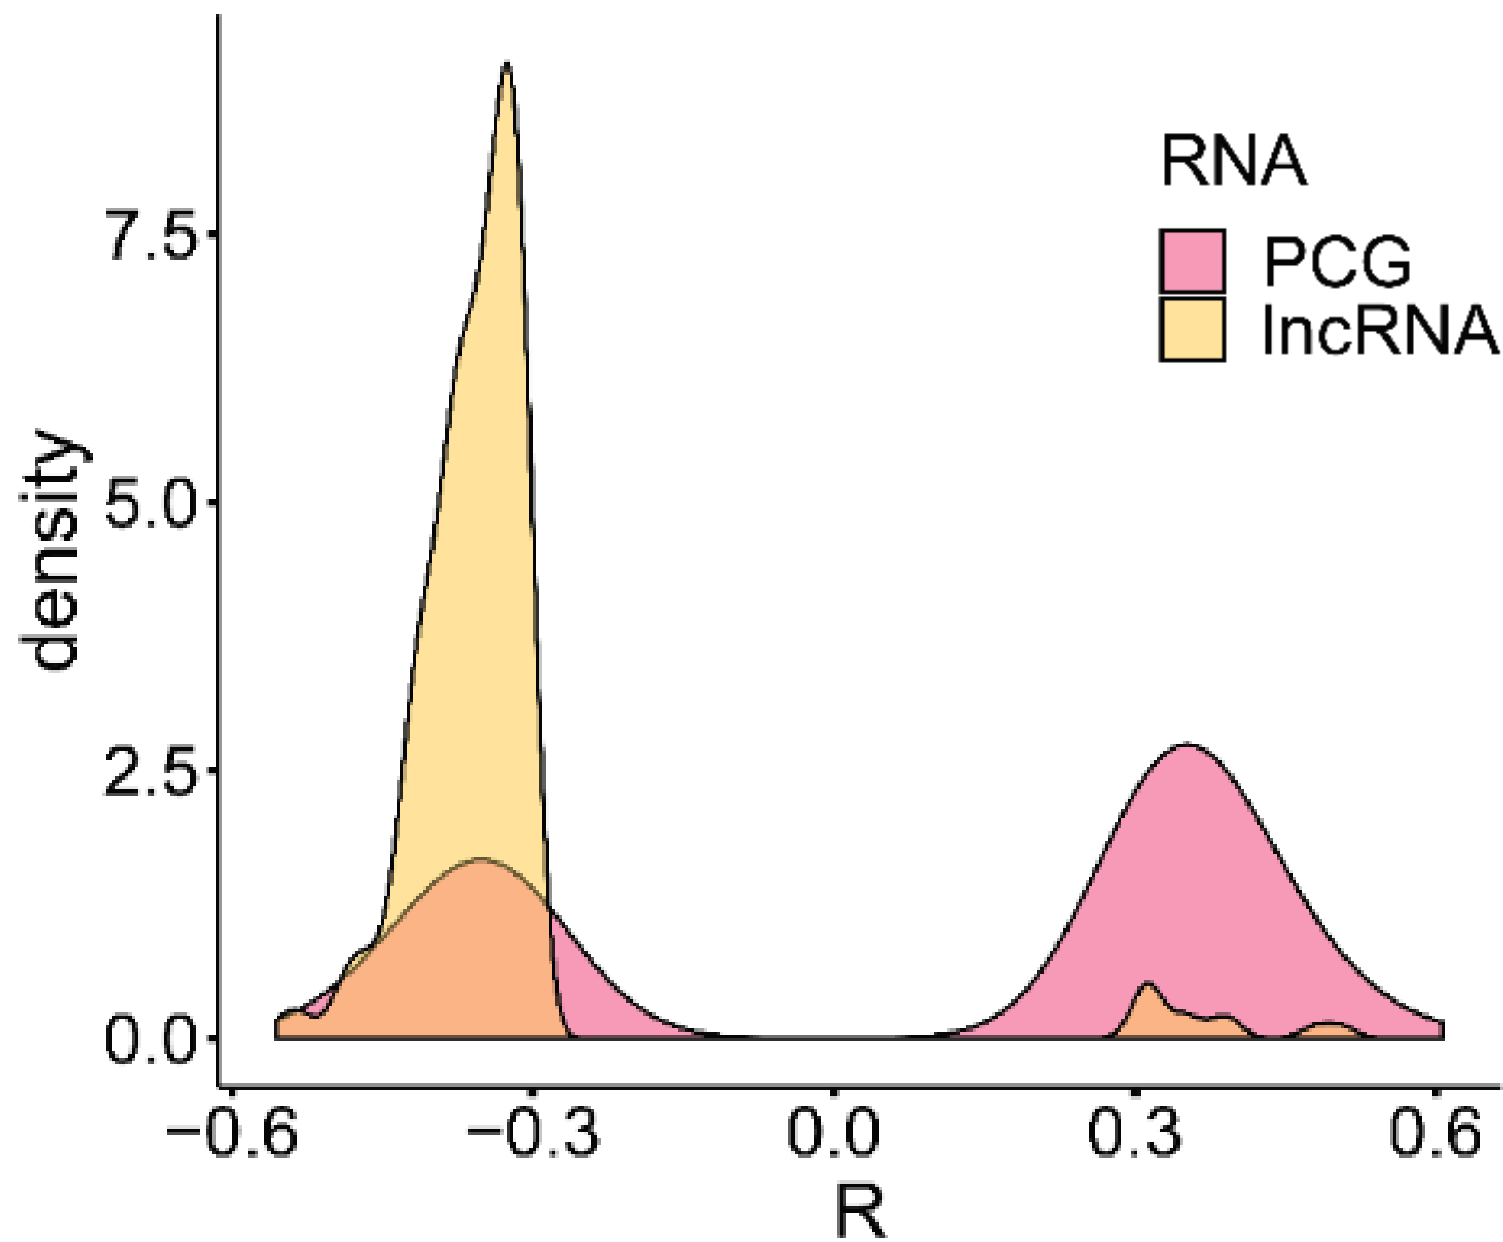

Fig. 5C

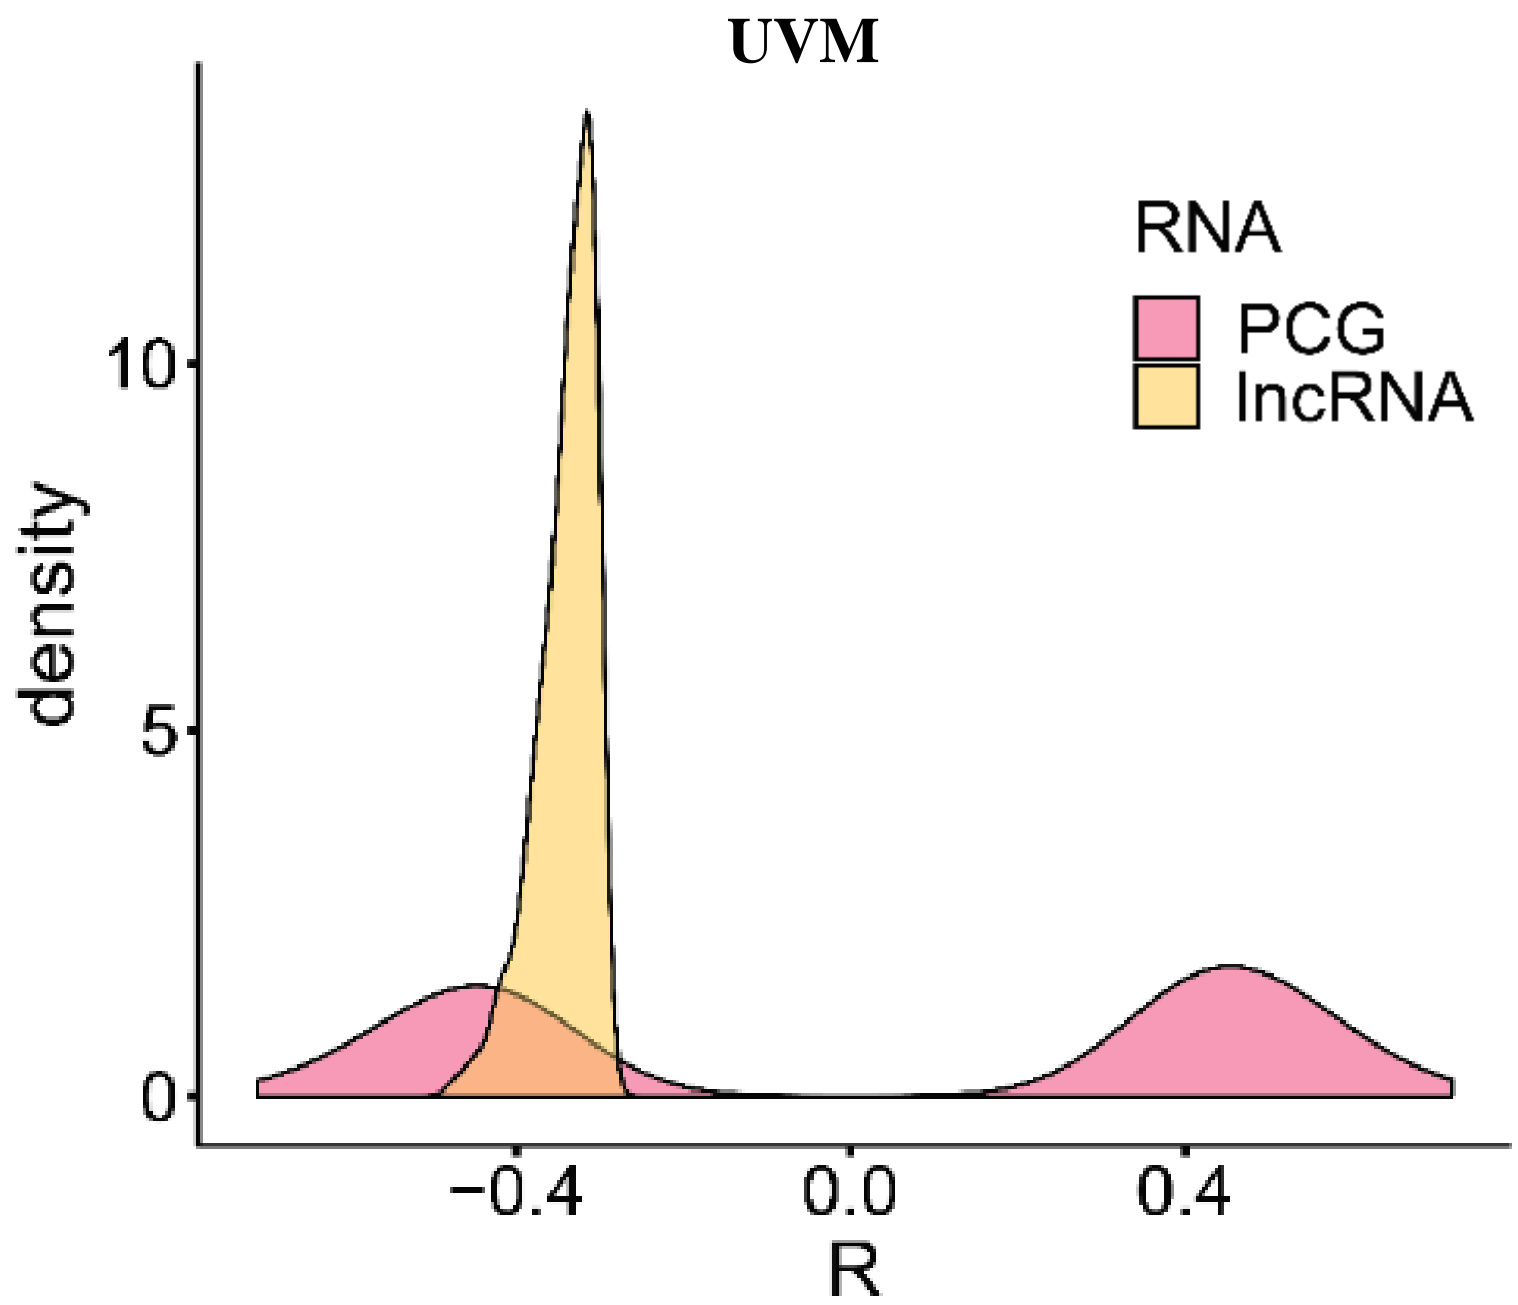

Fig. 5C

# LGG

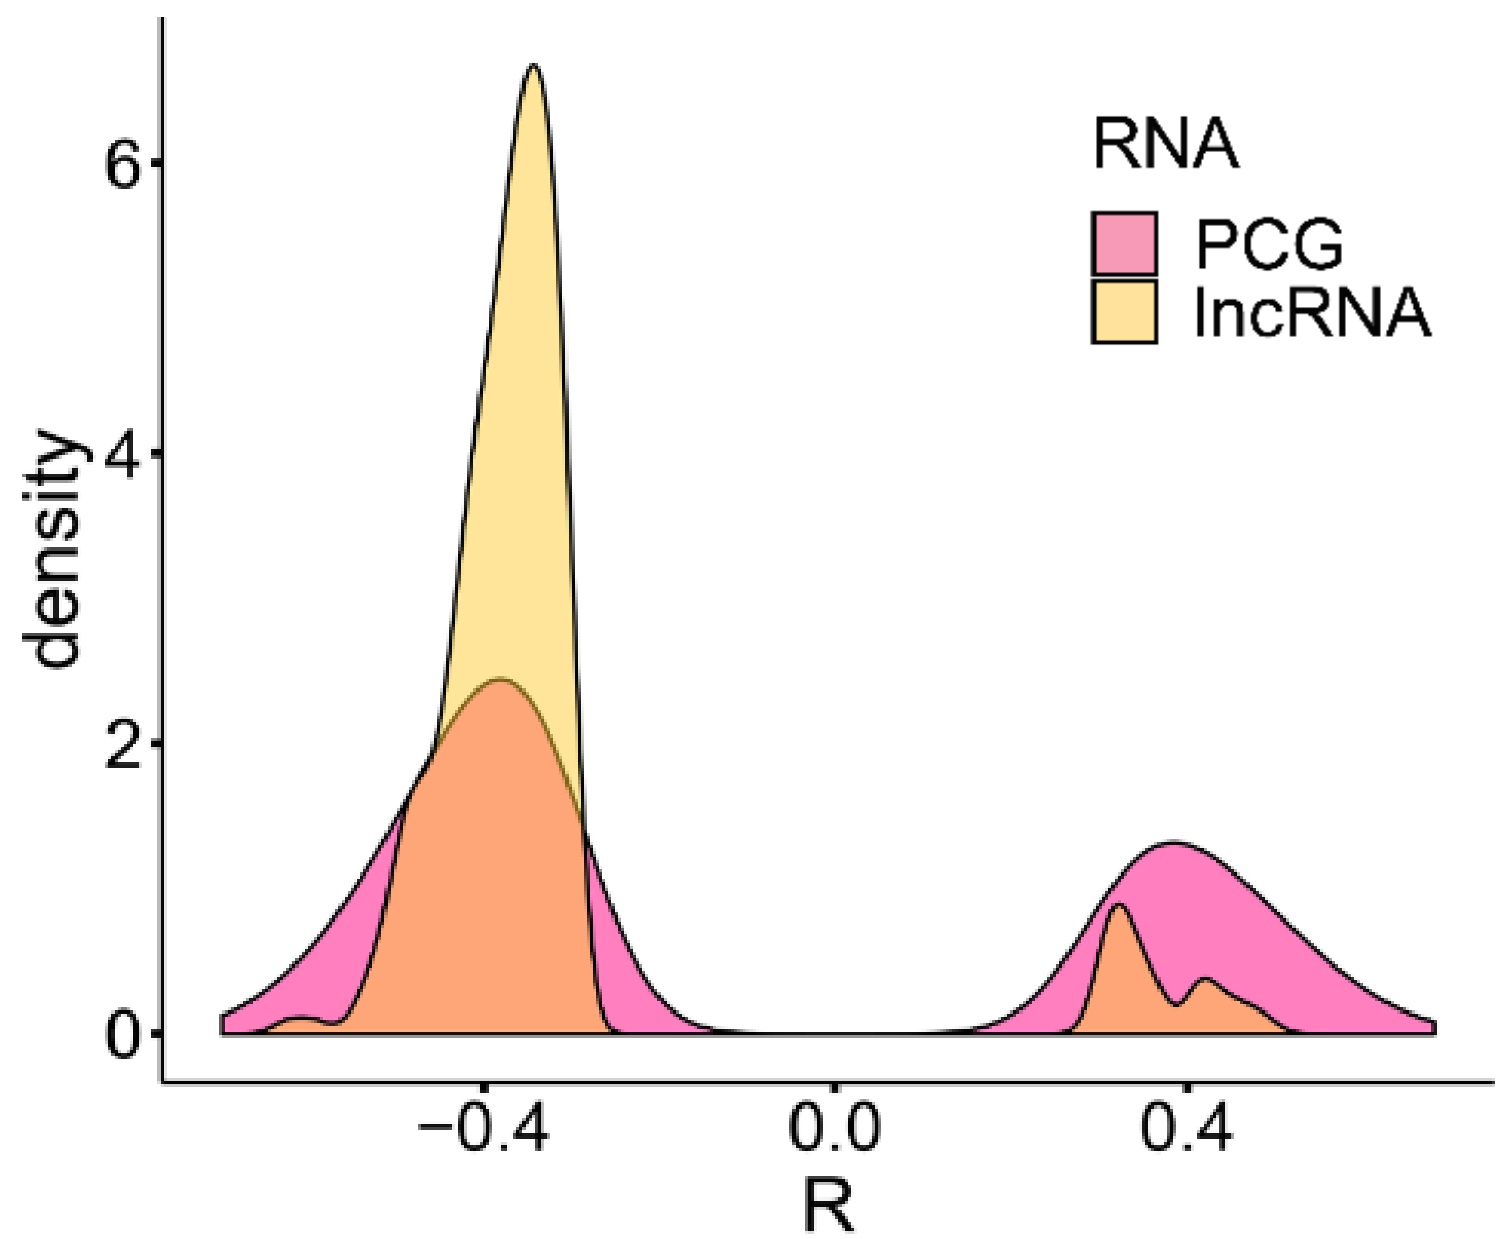

Fig. 5C

# MESO

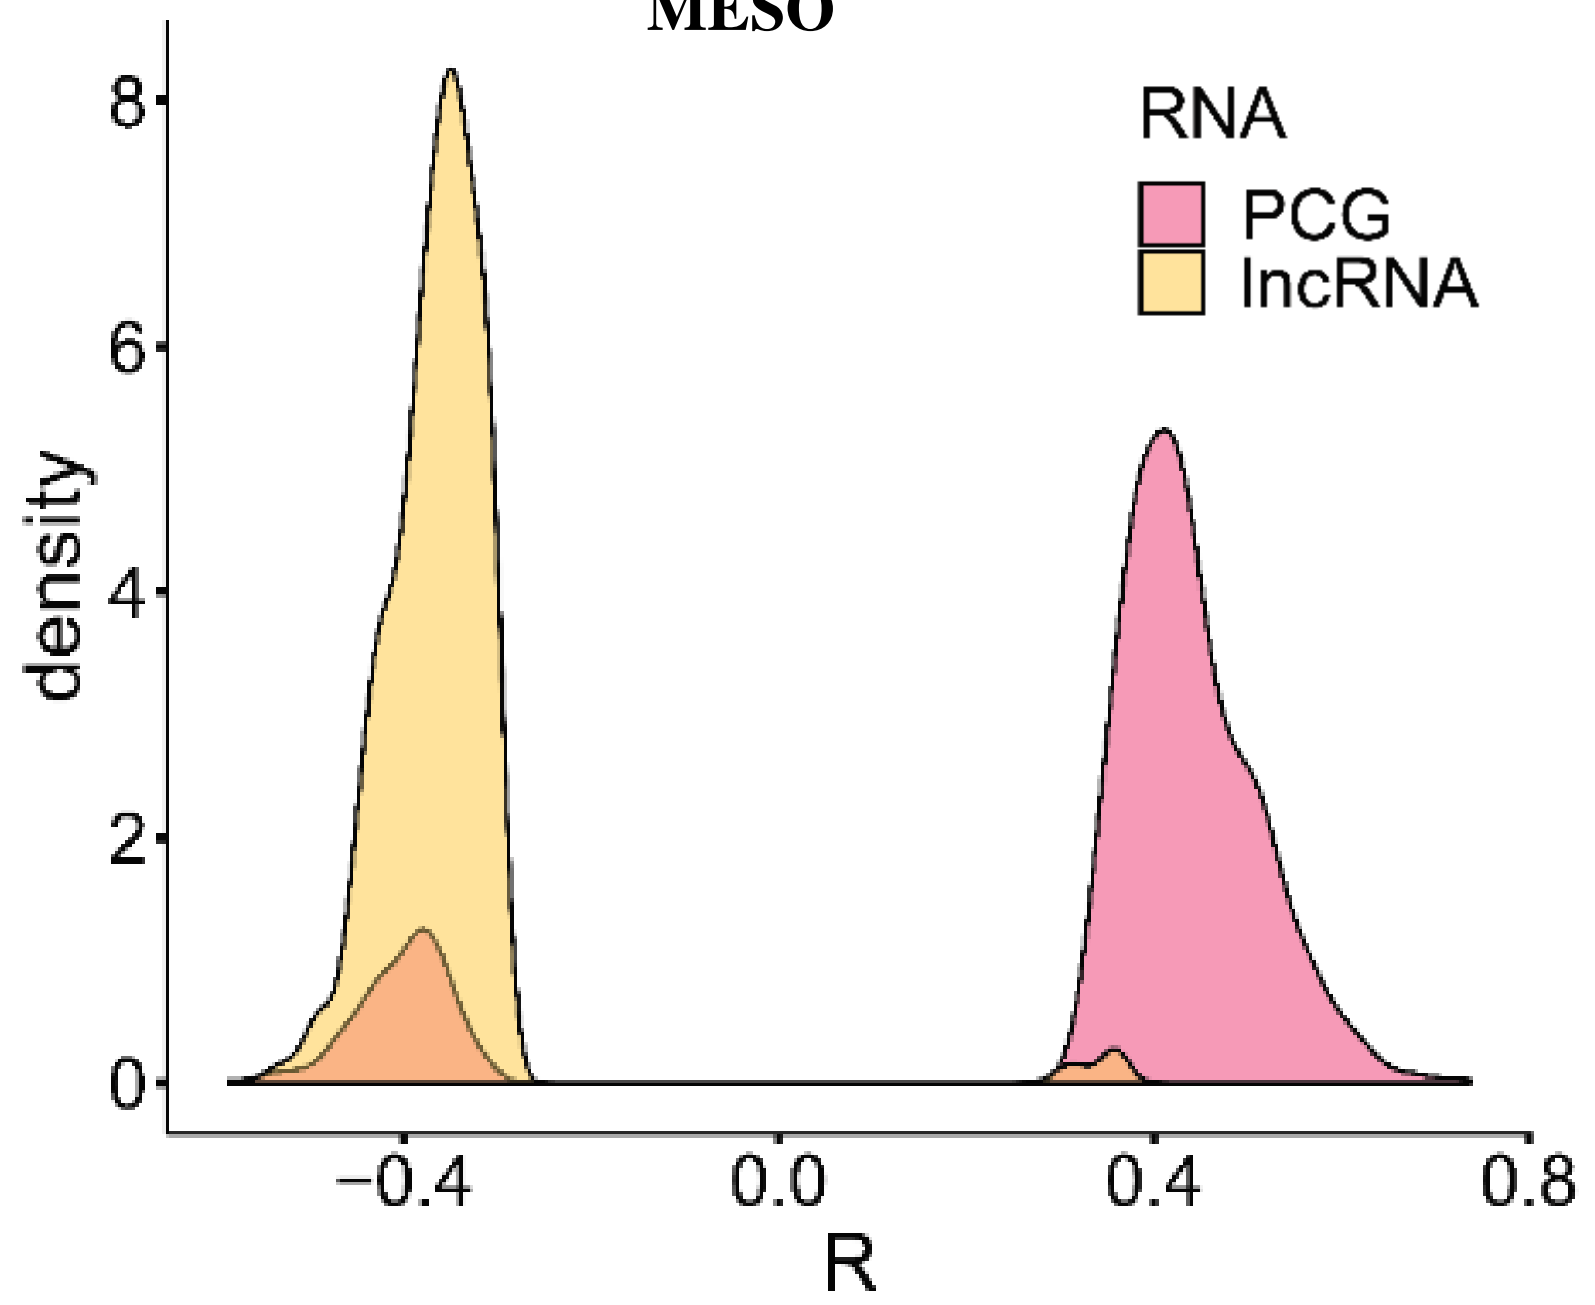

Fig. 5C

# PAAD

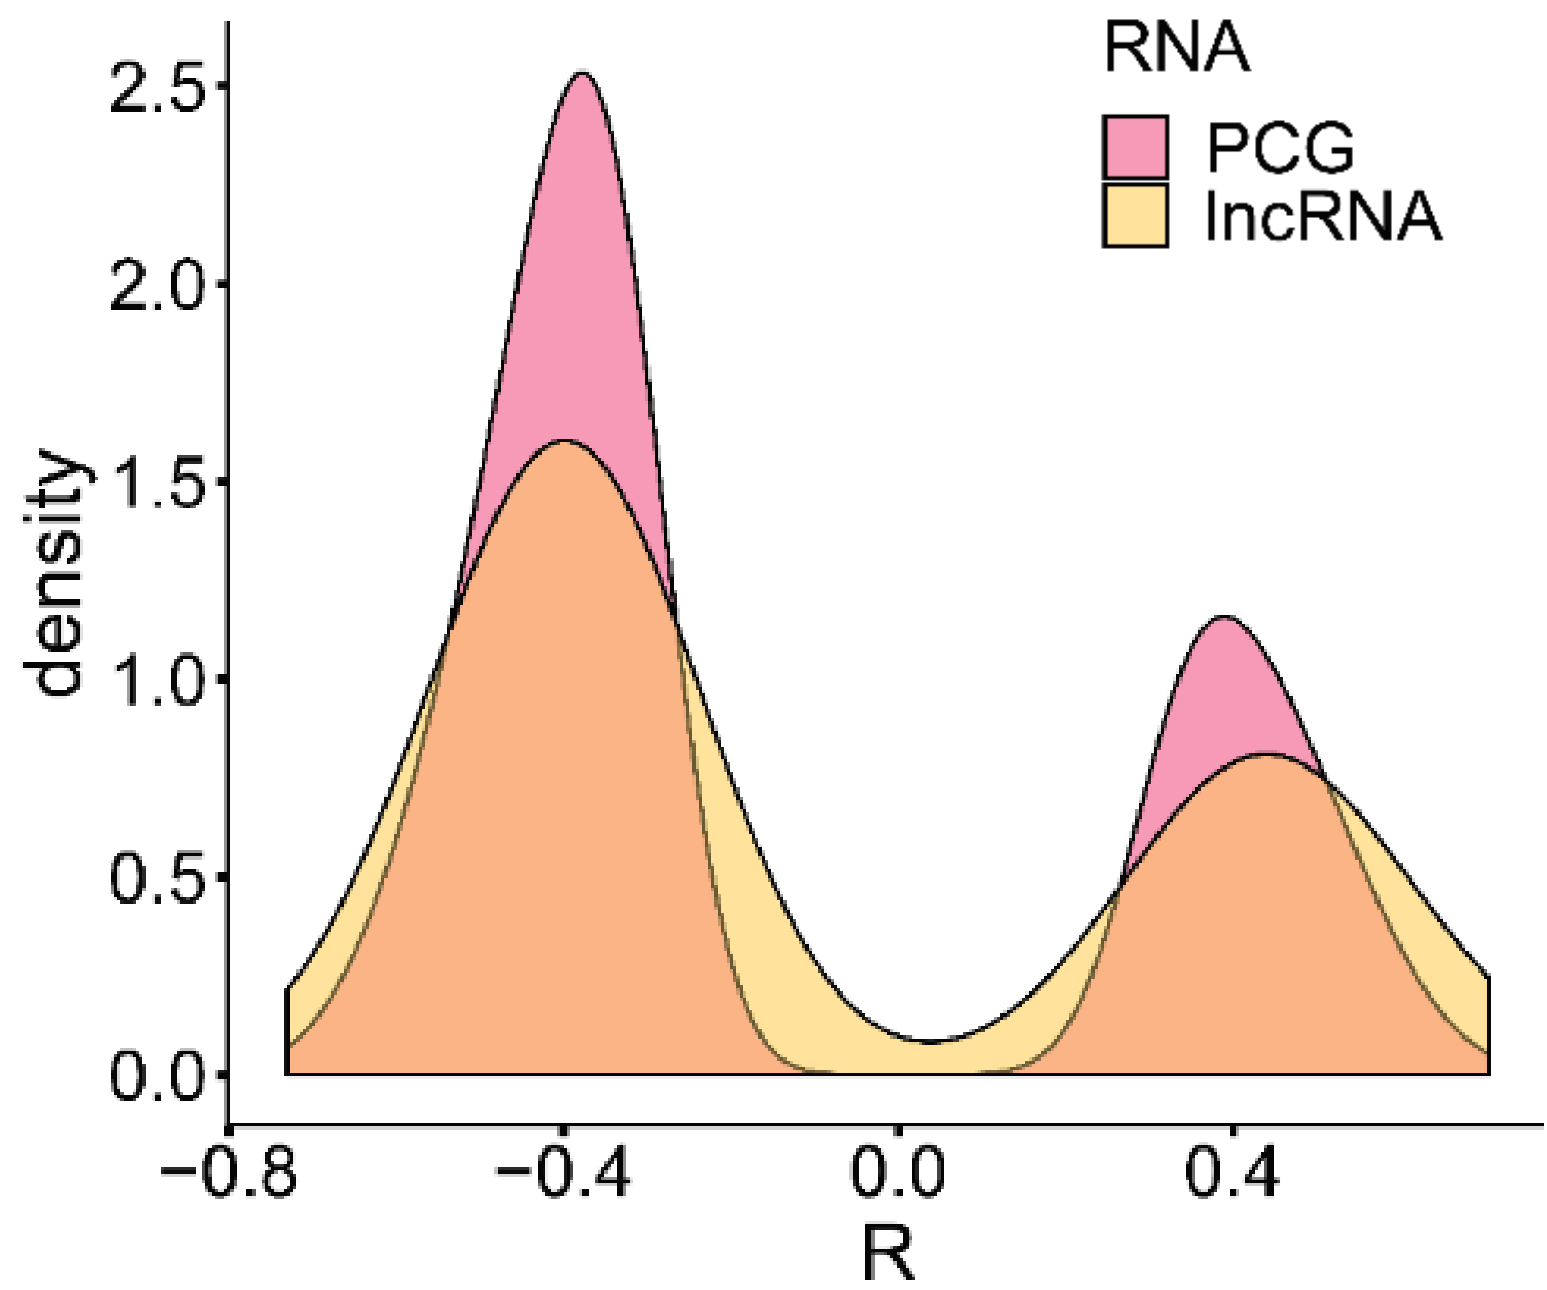

**Fig. 5D**

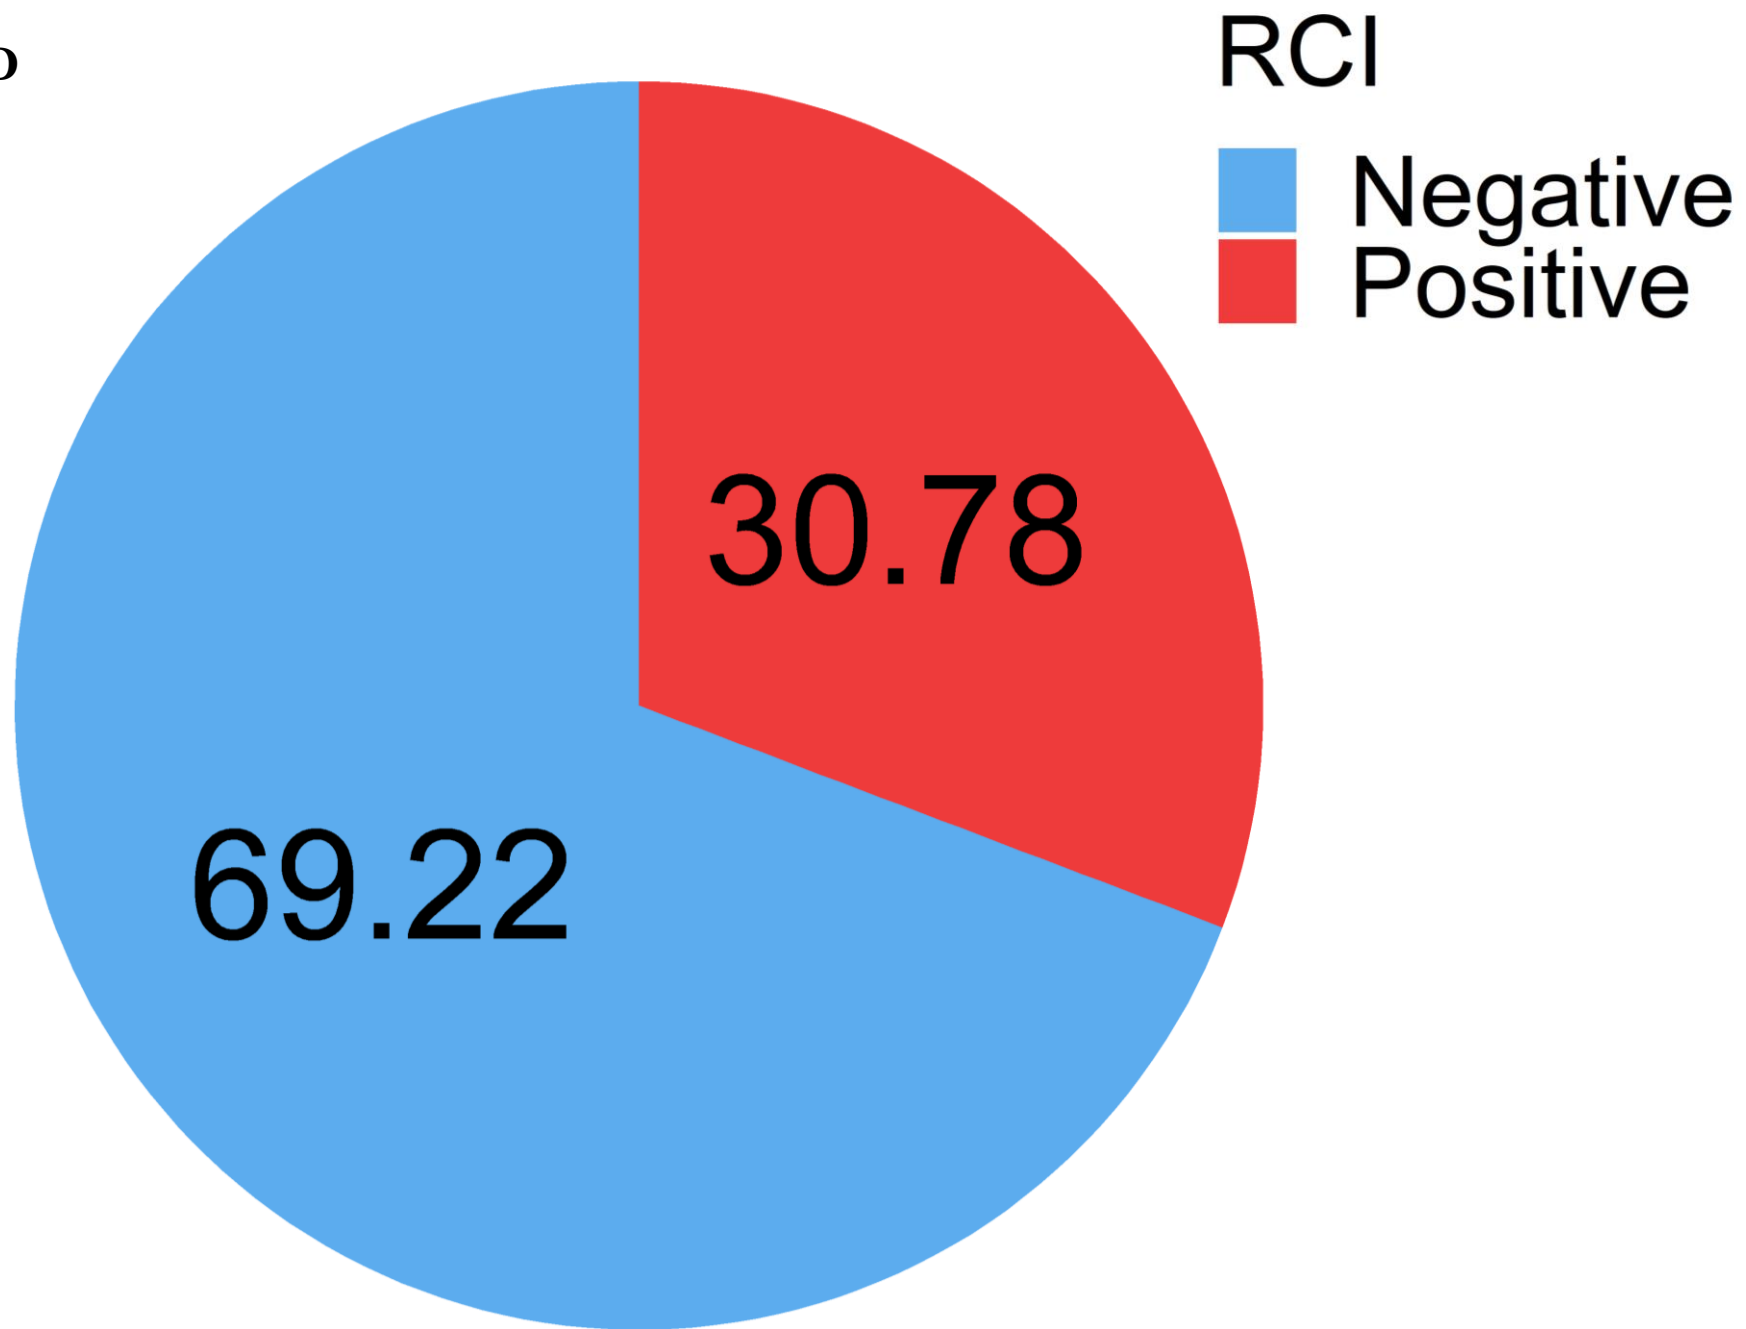



**Fig. 5E**

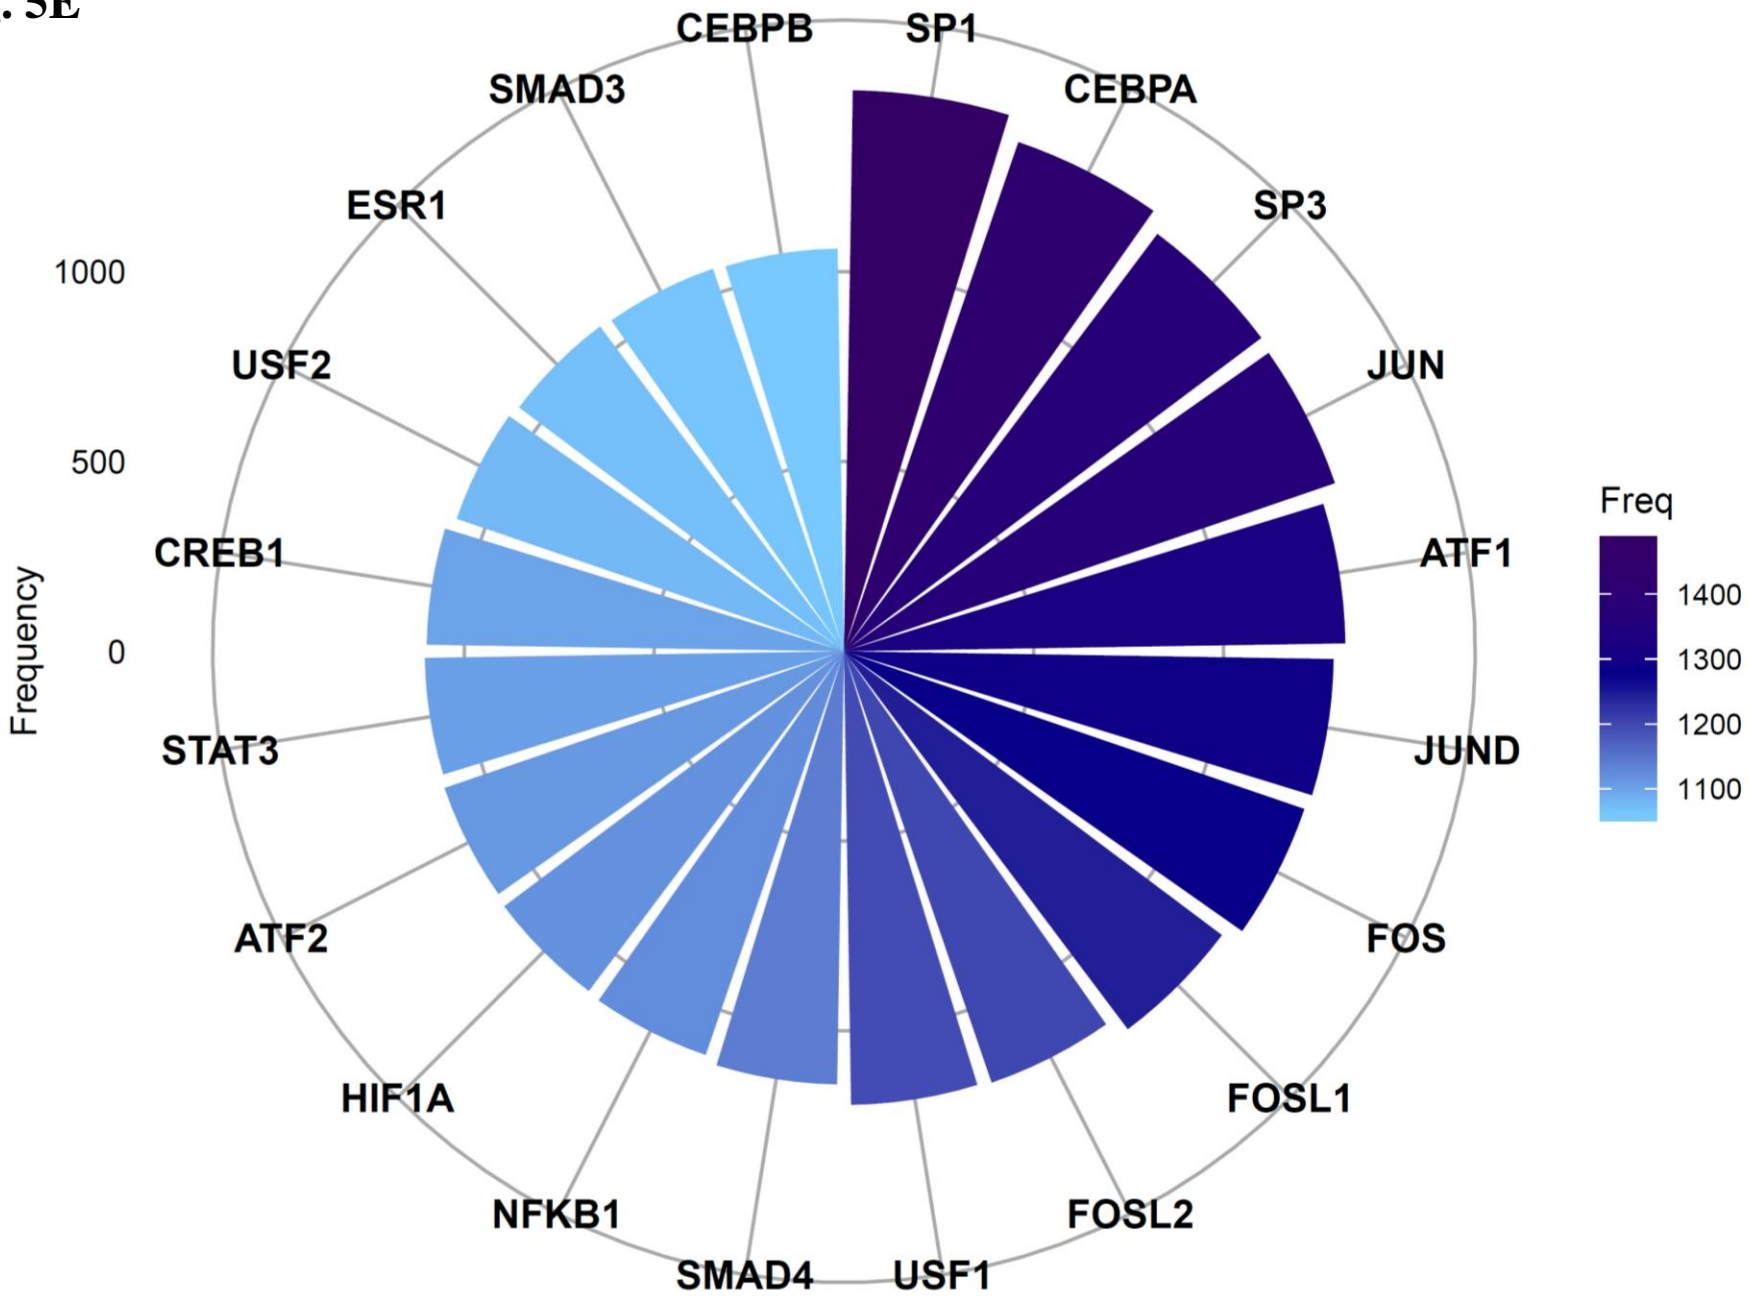

Fig. 5F

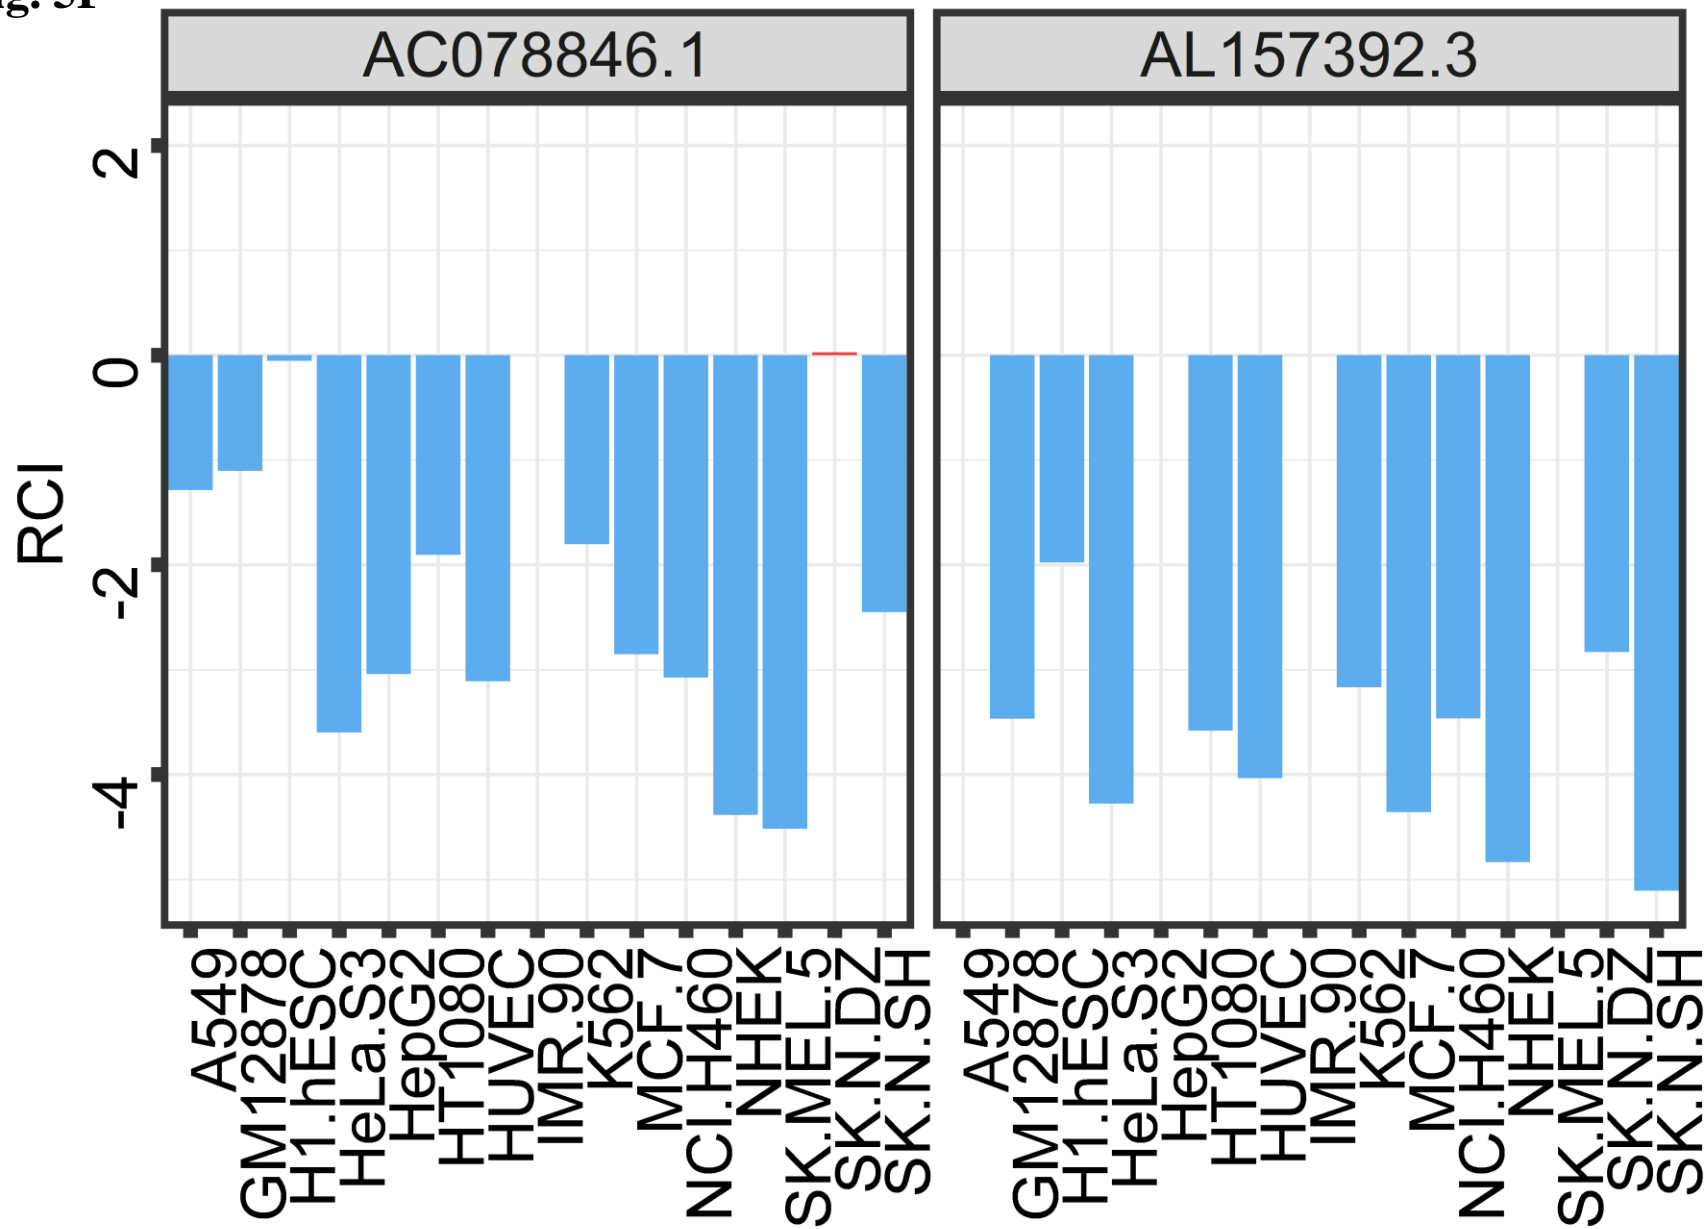

Fig. 5F

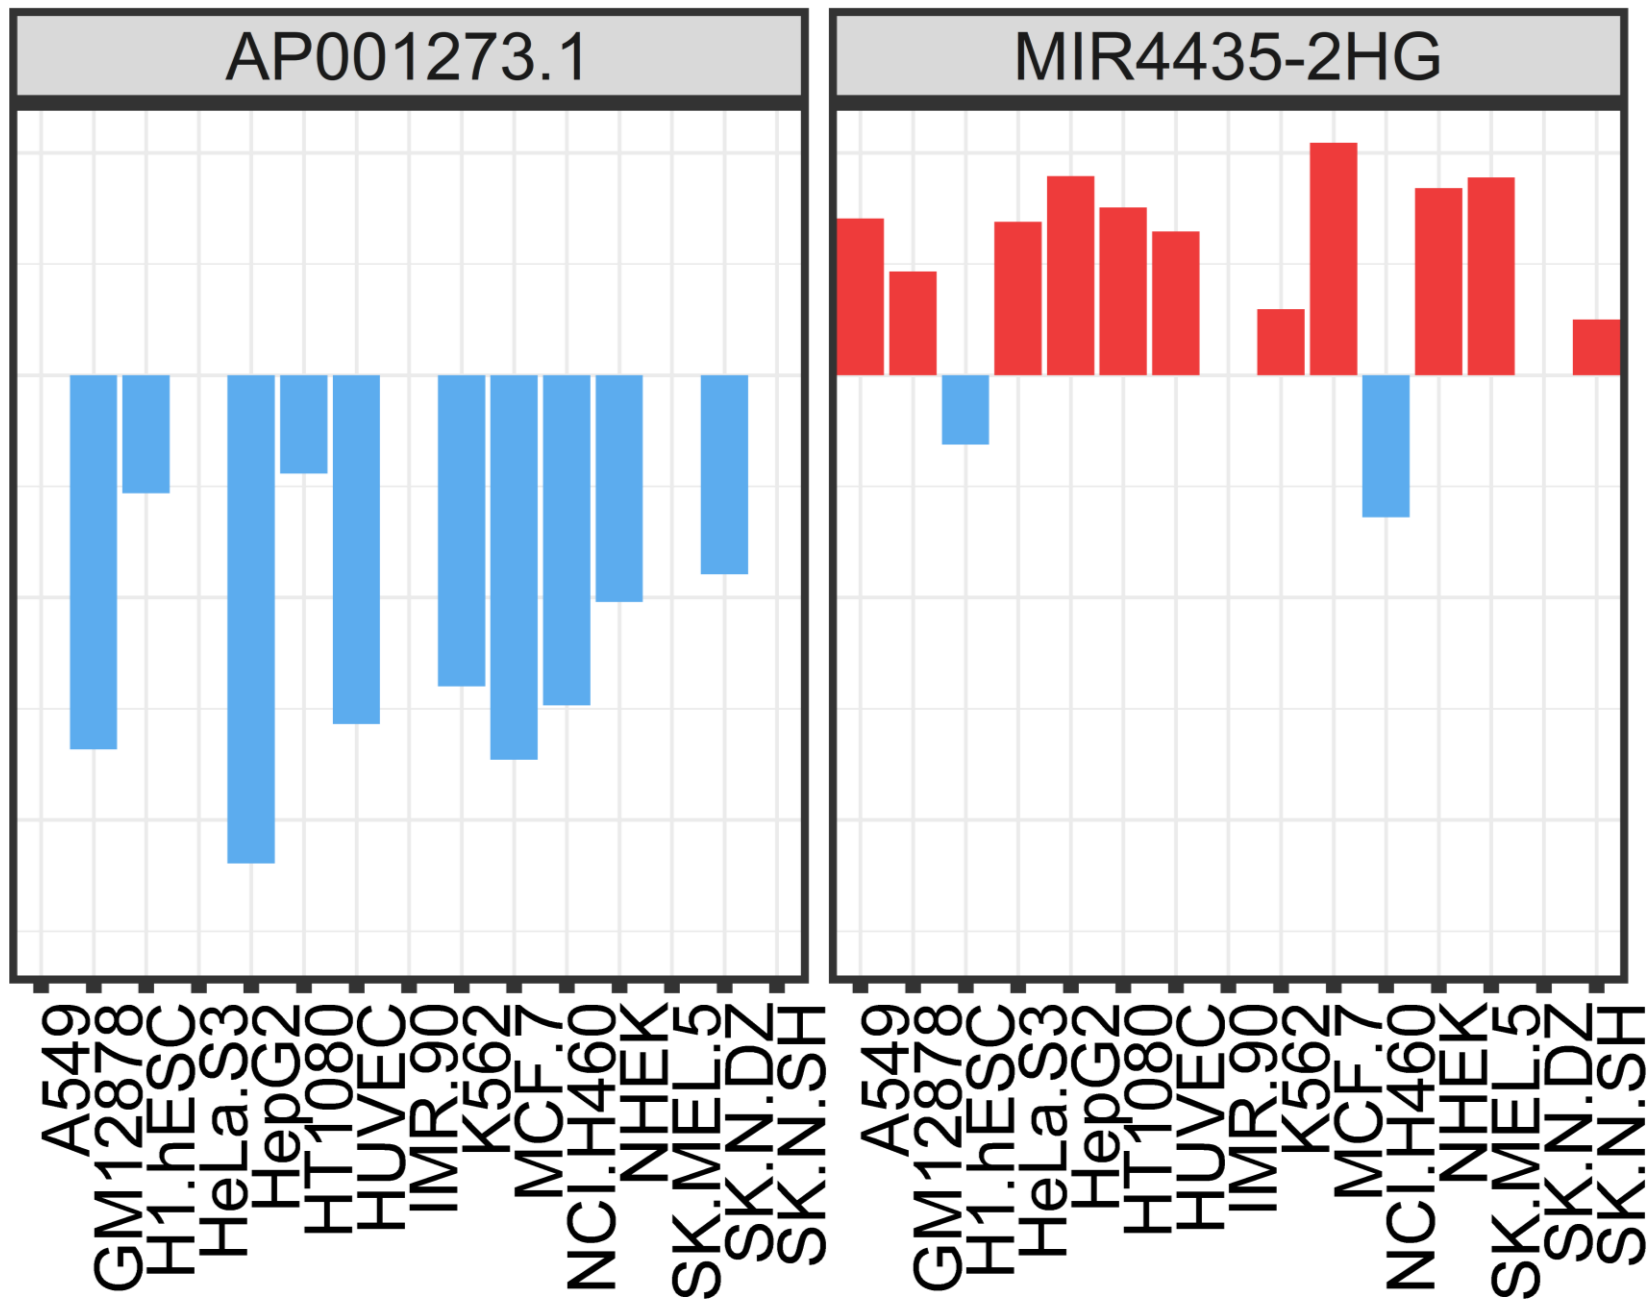

Fig. 5F

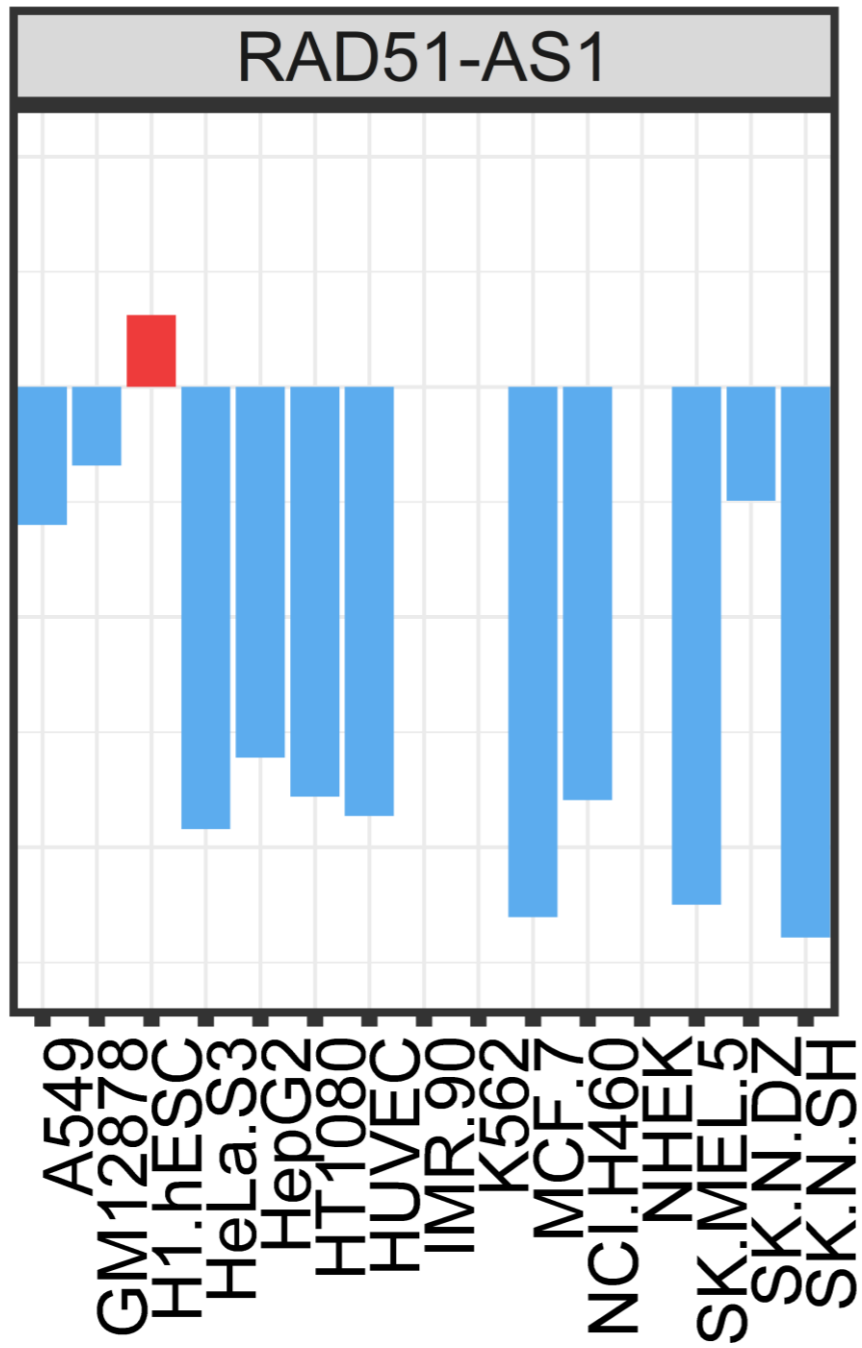

**Fig. 5G**

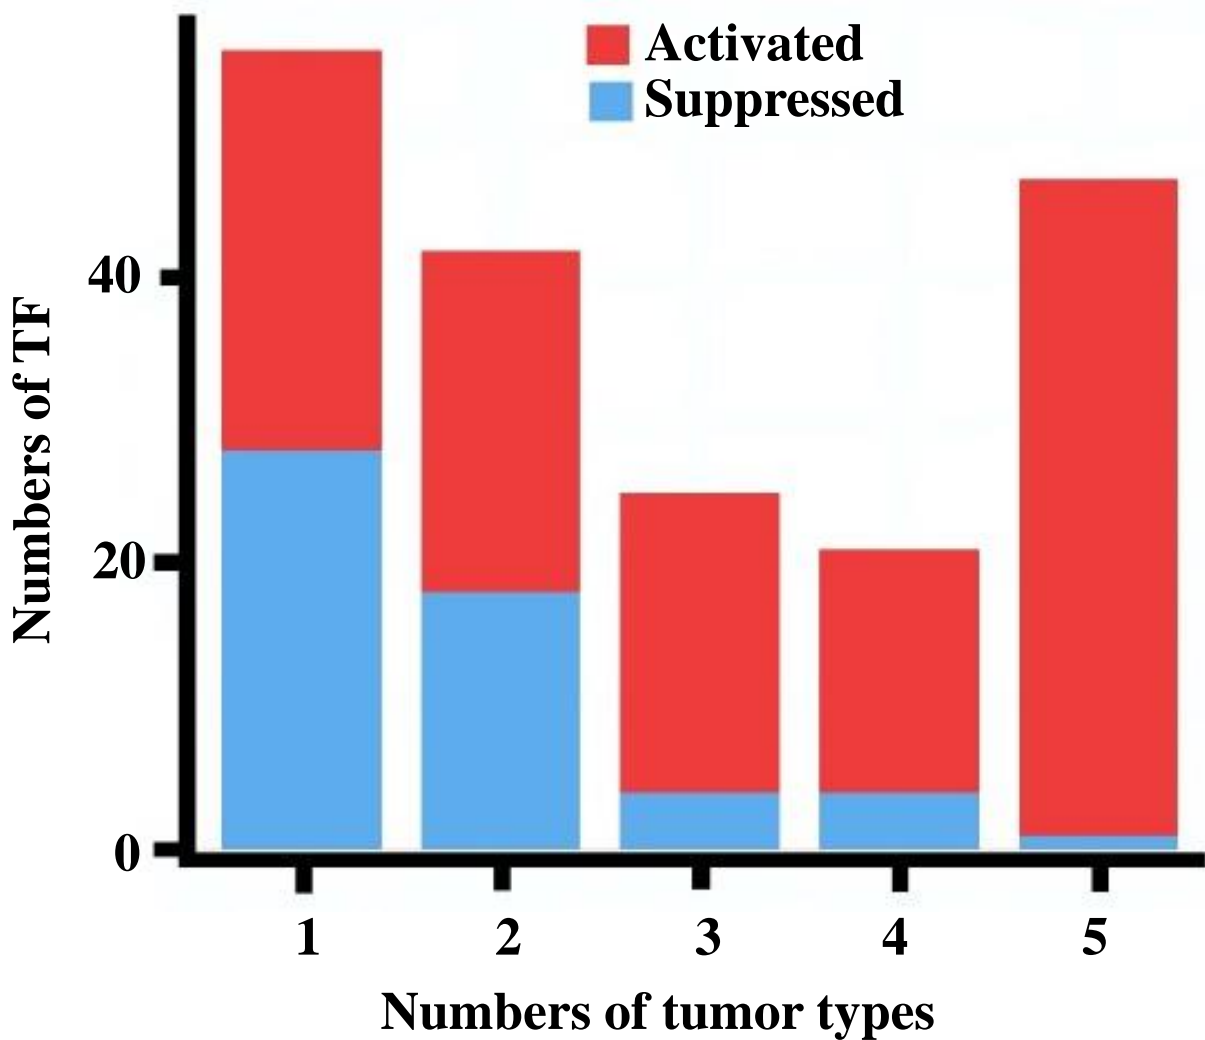

**Fig. 5H**

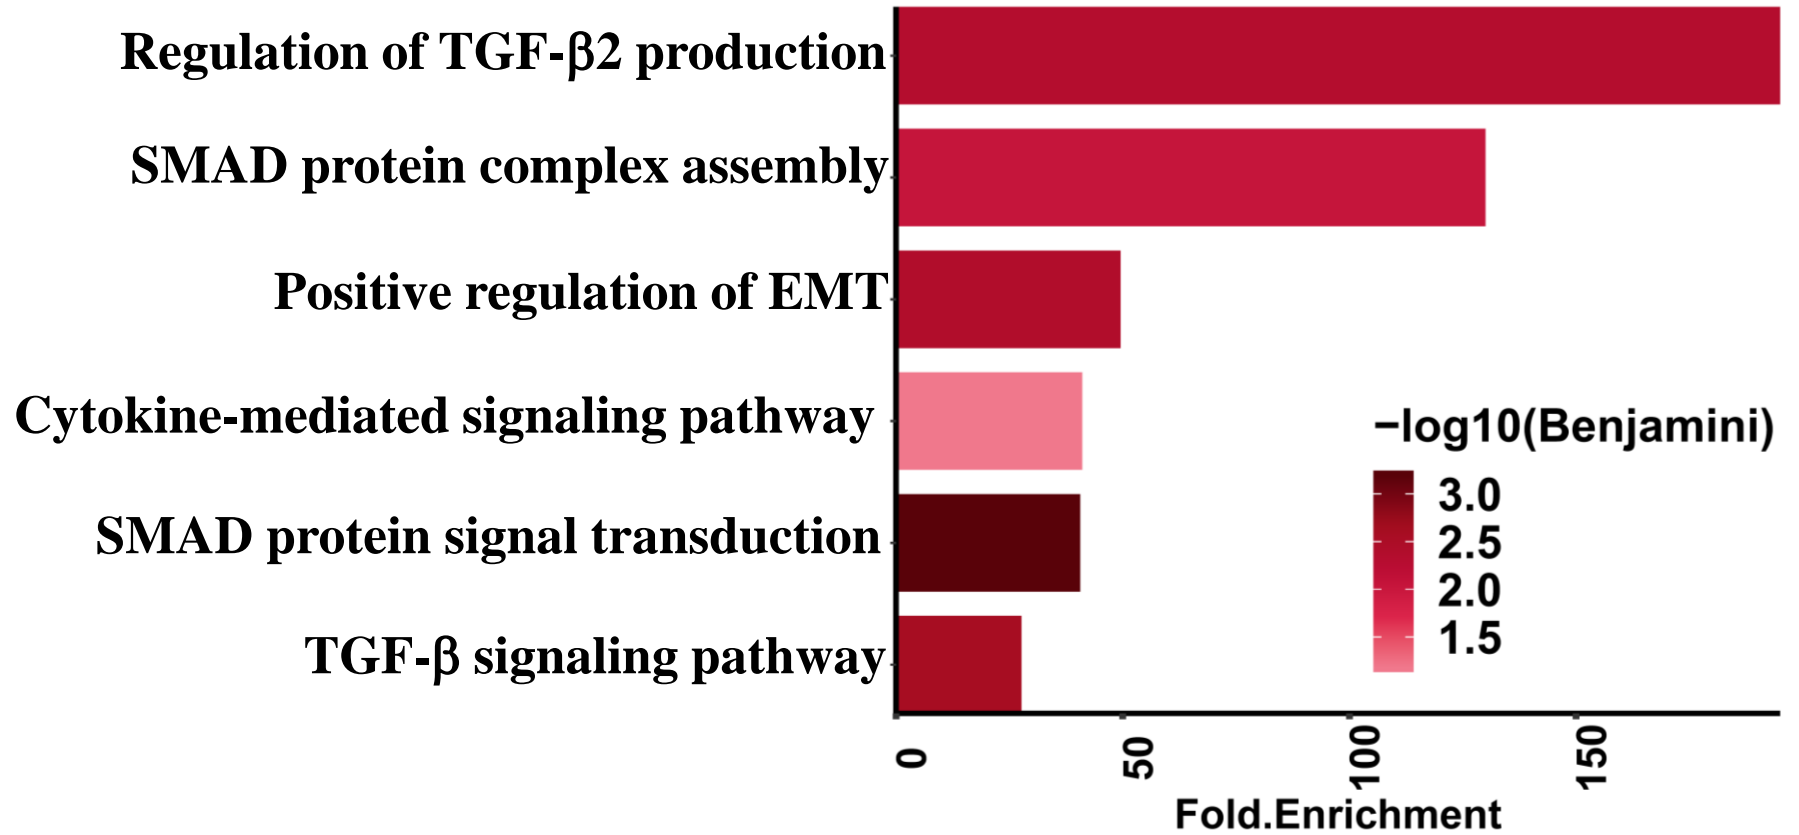

Fig. 5I

# BLCA

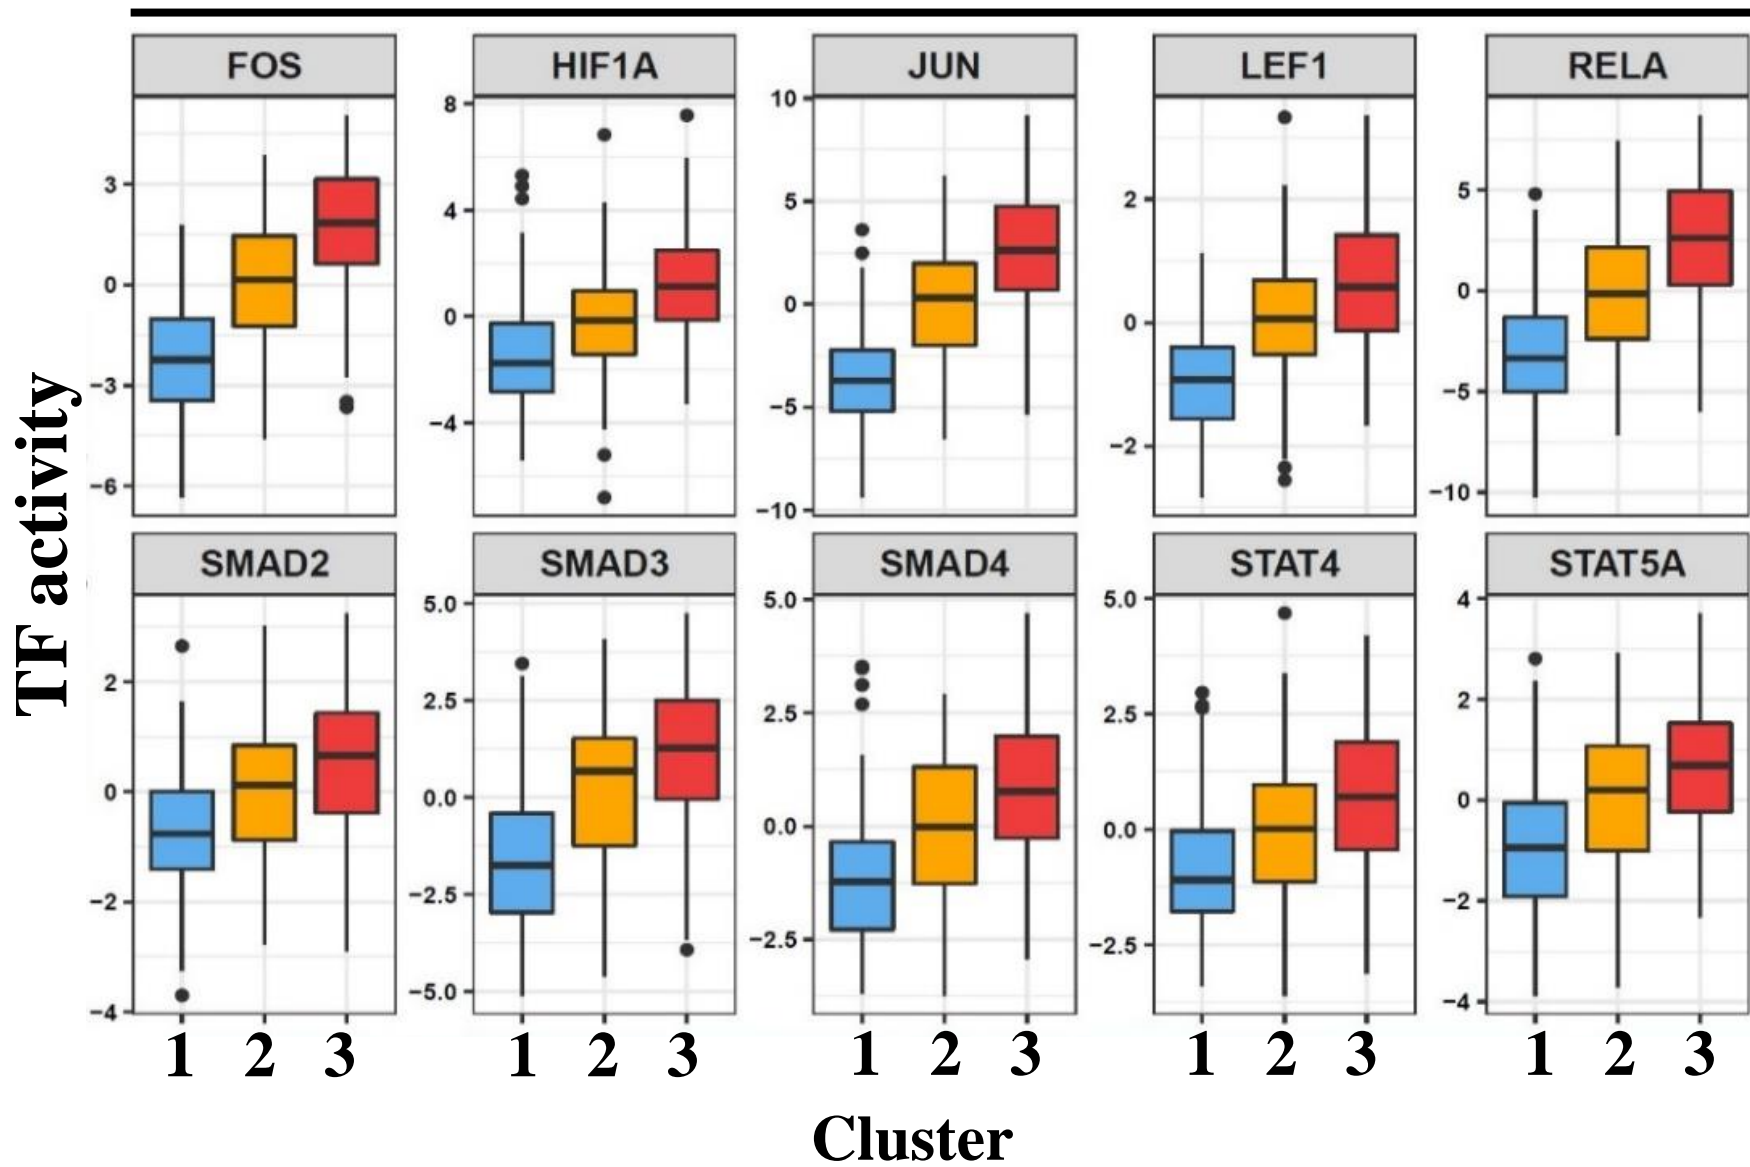

Fig. 5I

# LGG

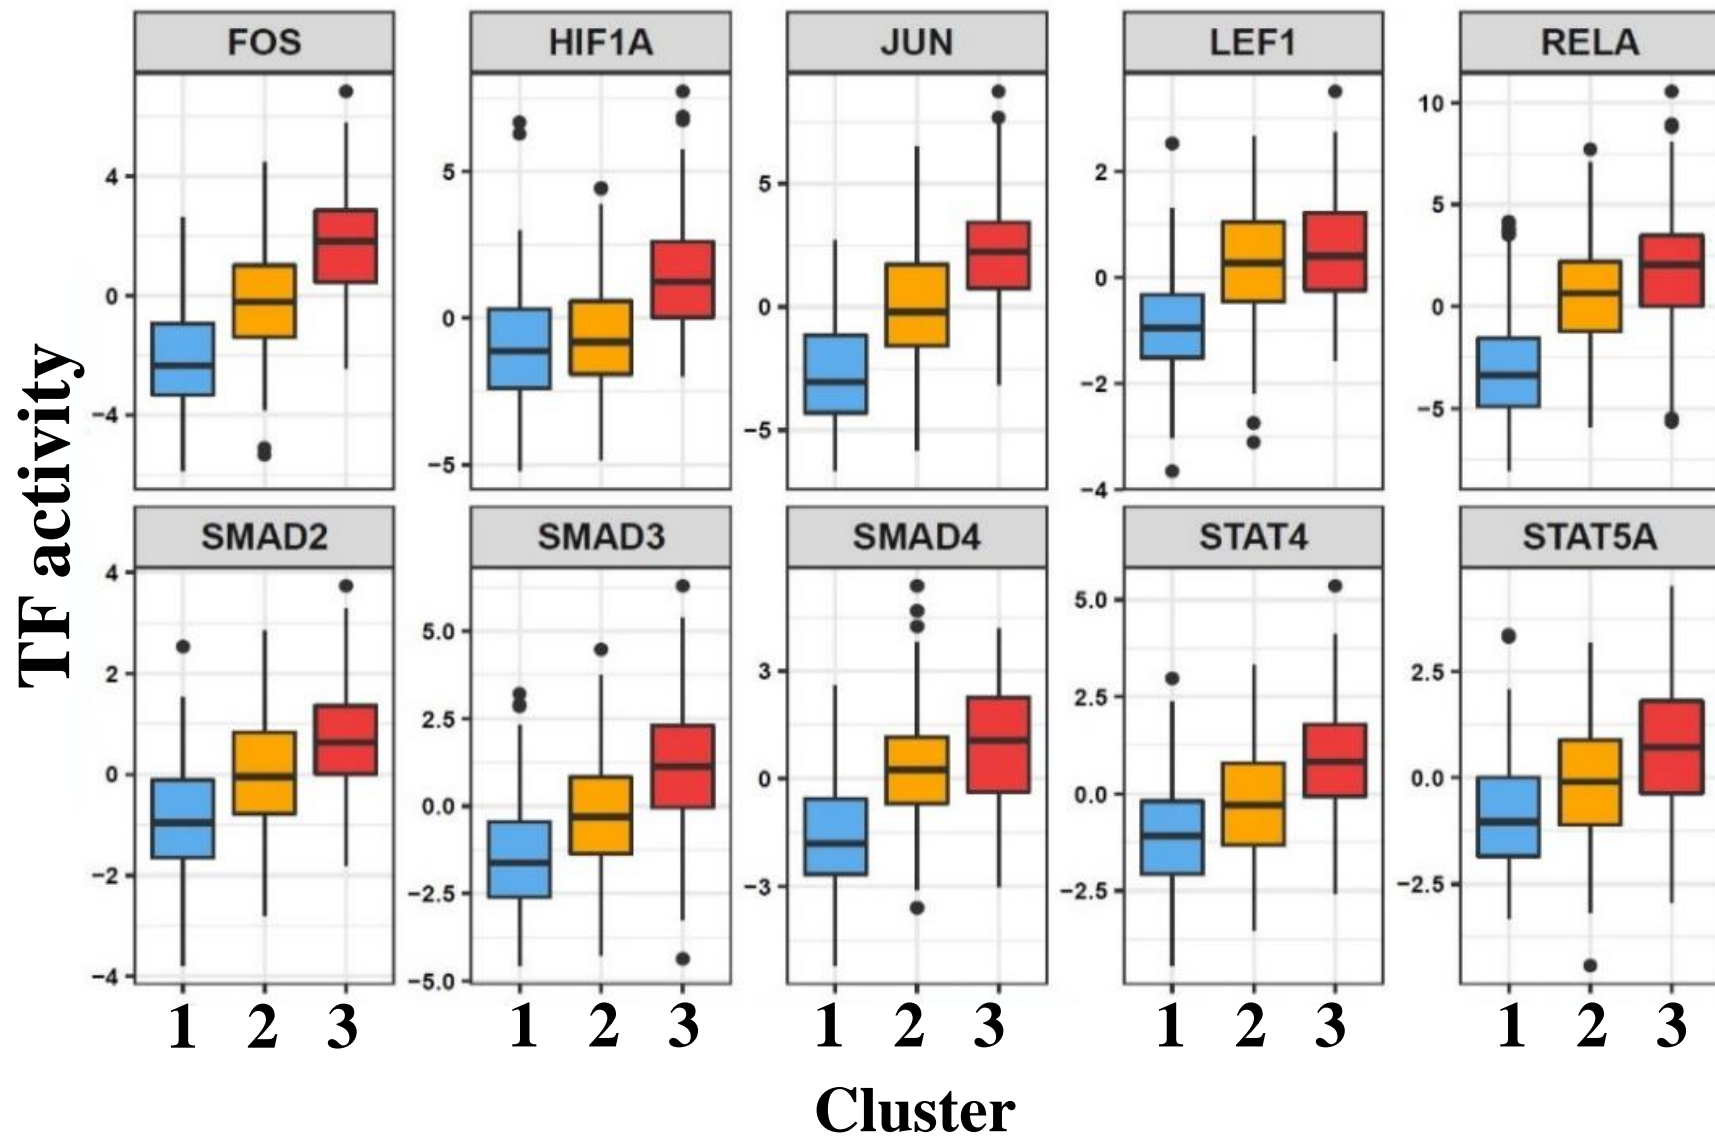



Fig. 5I

# MESO

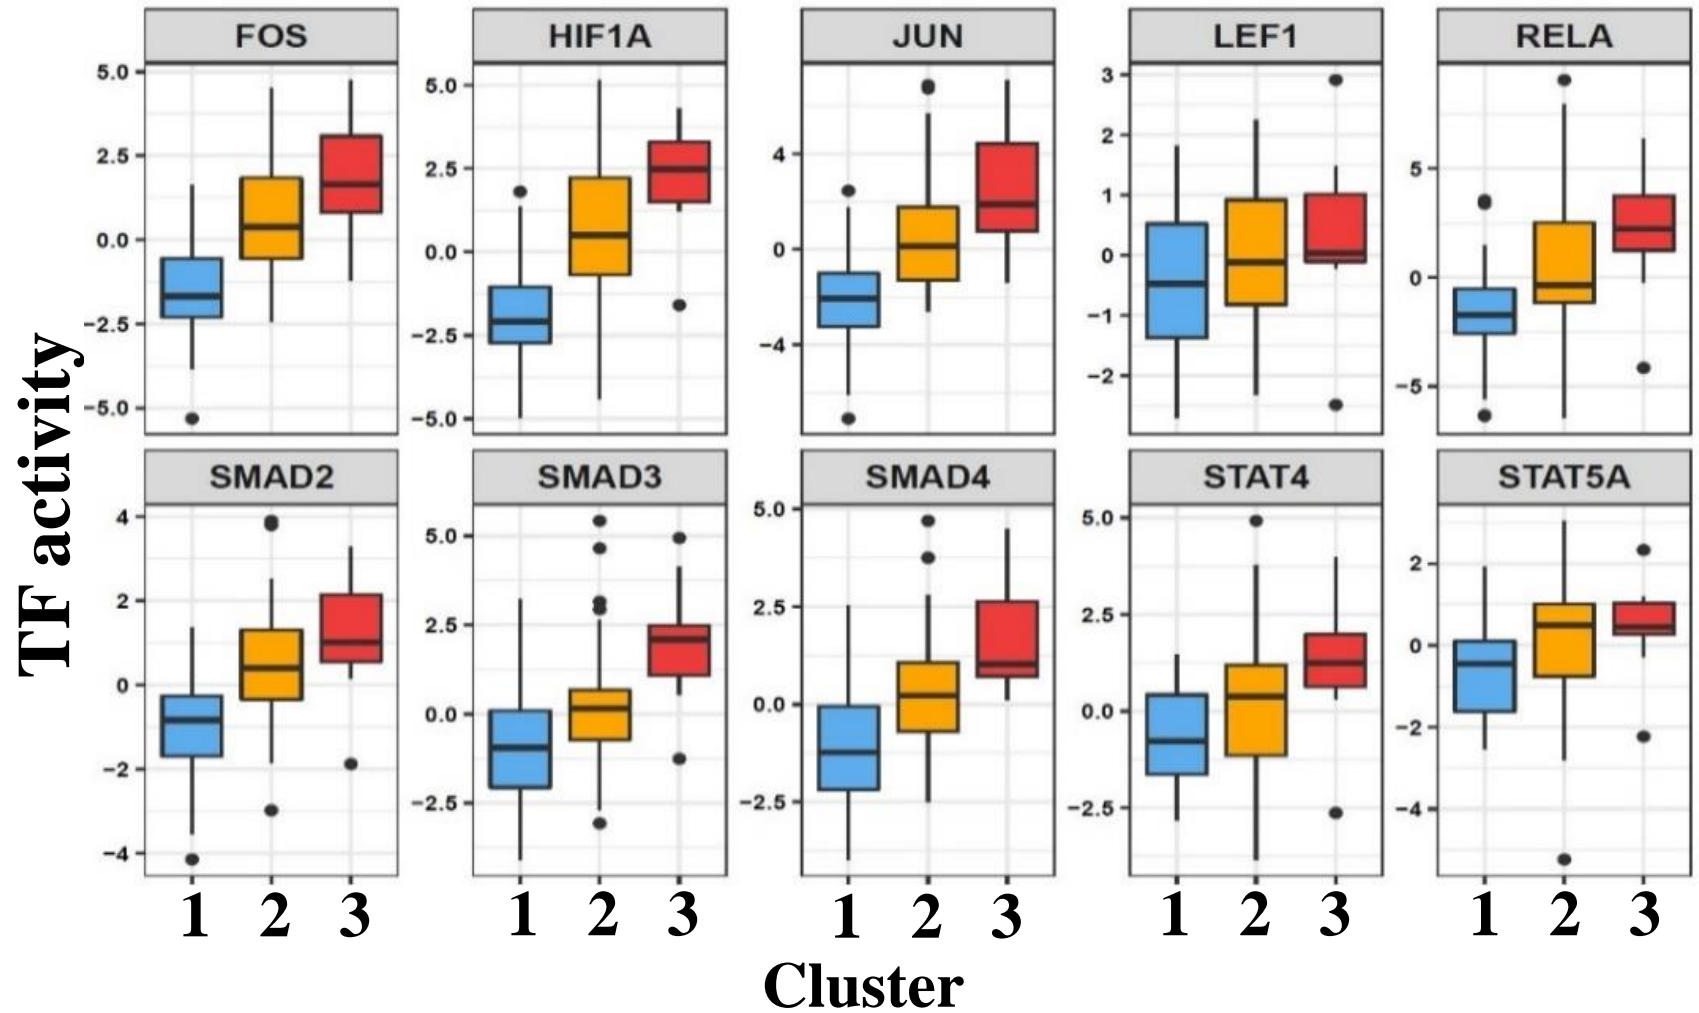

Fig. 5I

# PAAD

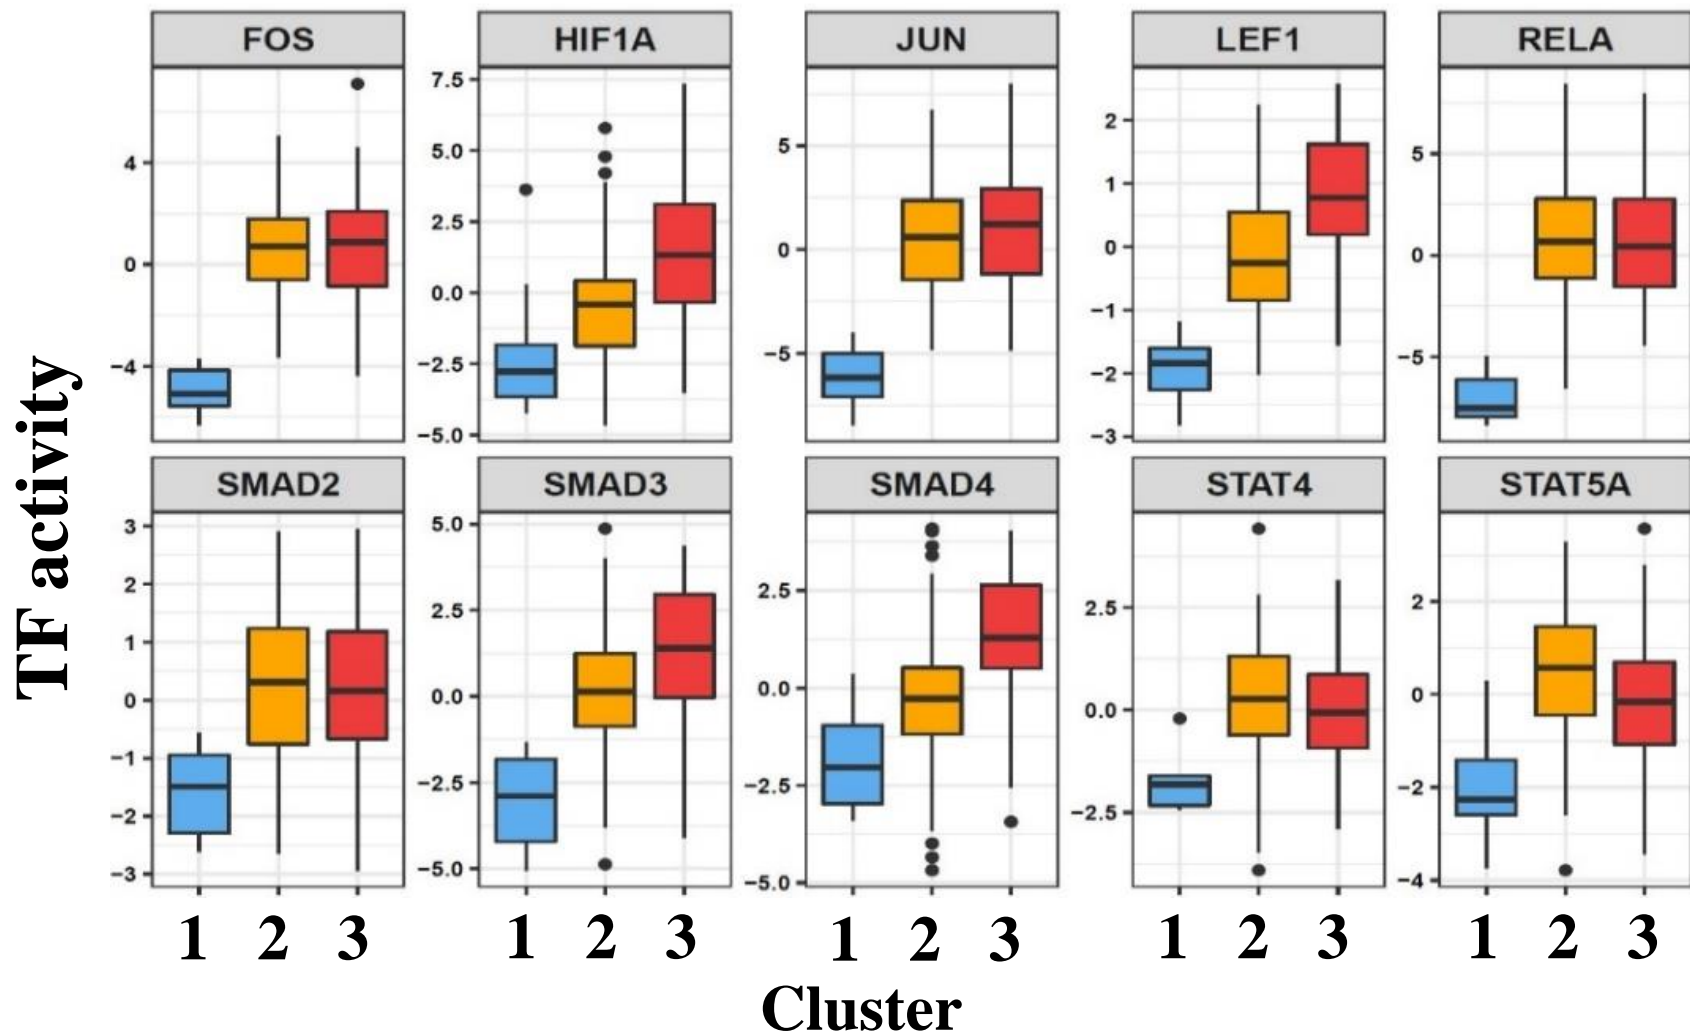

Fig. 5I

# UVM

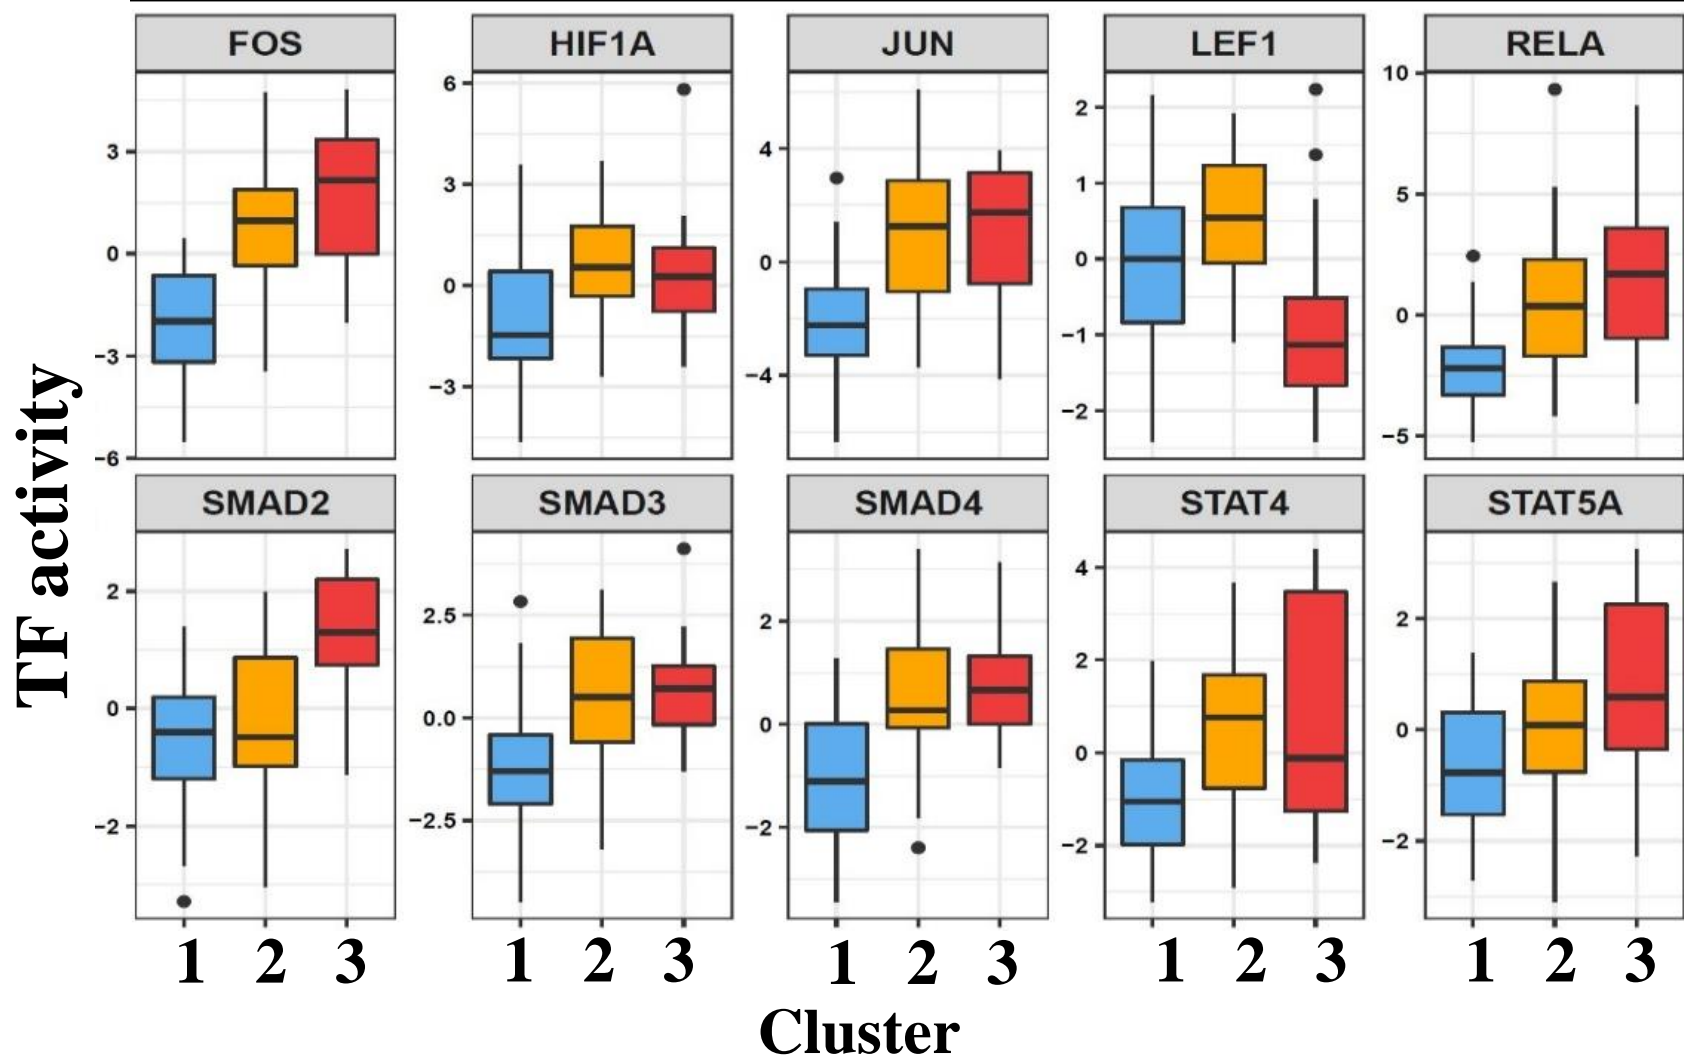

**Fig. 5J**

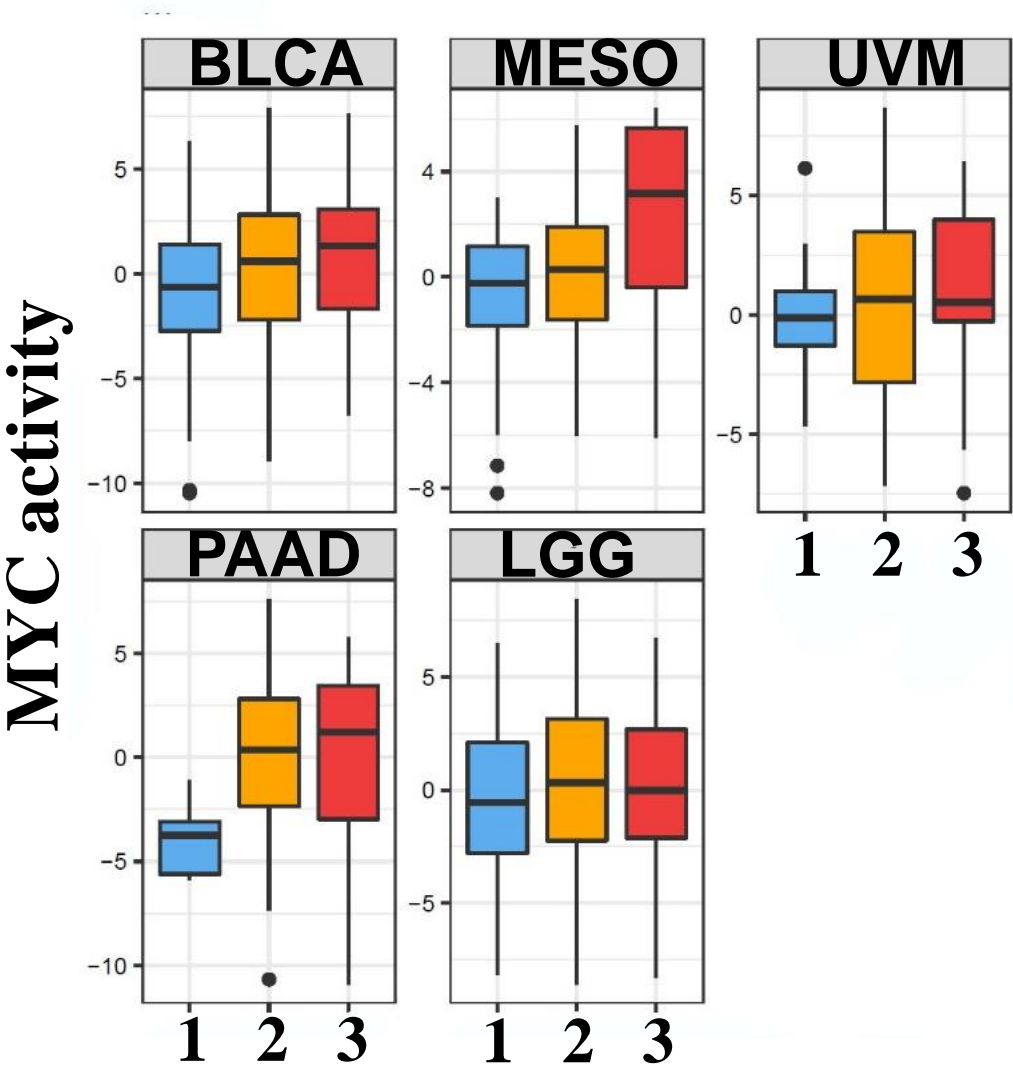

Fig. 5K

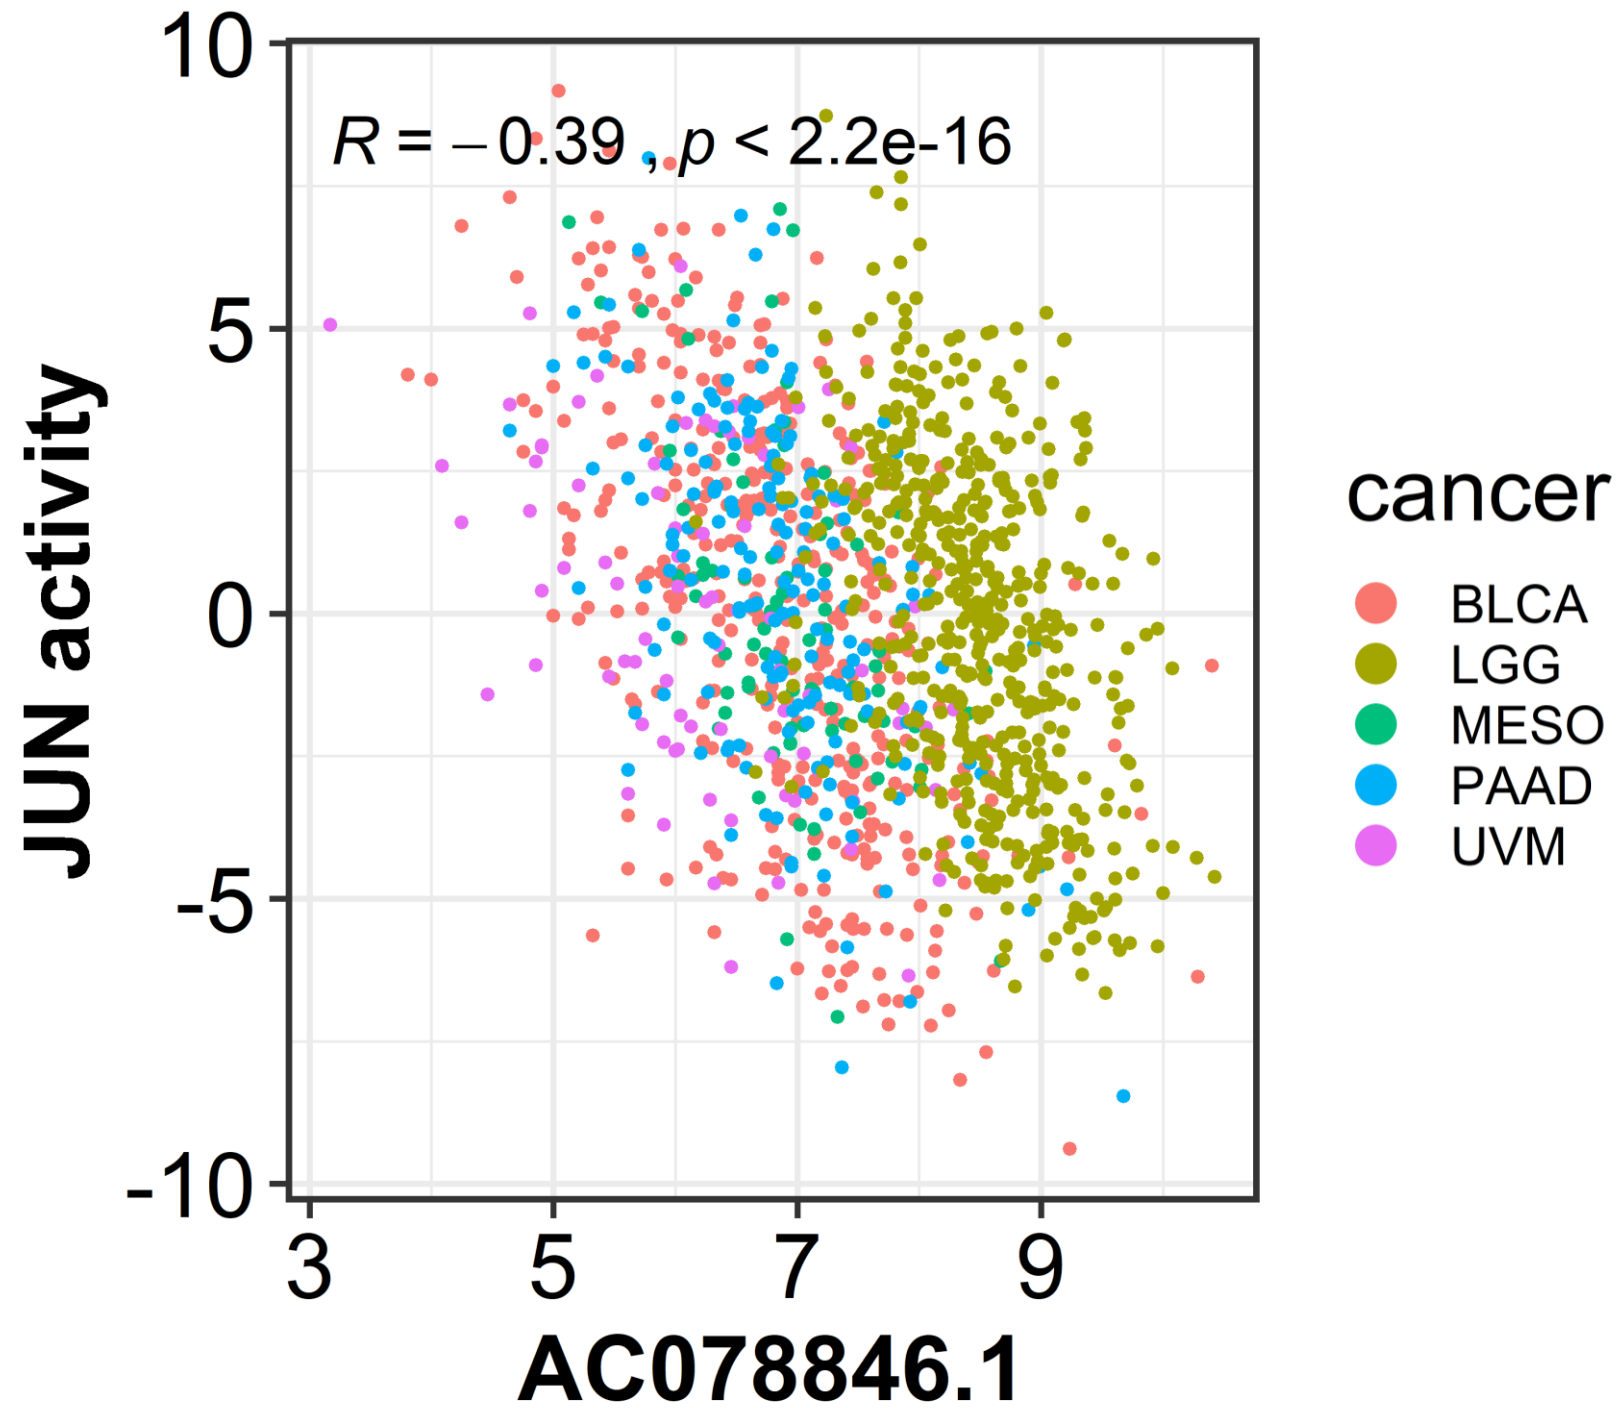

Fig. 5K

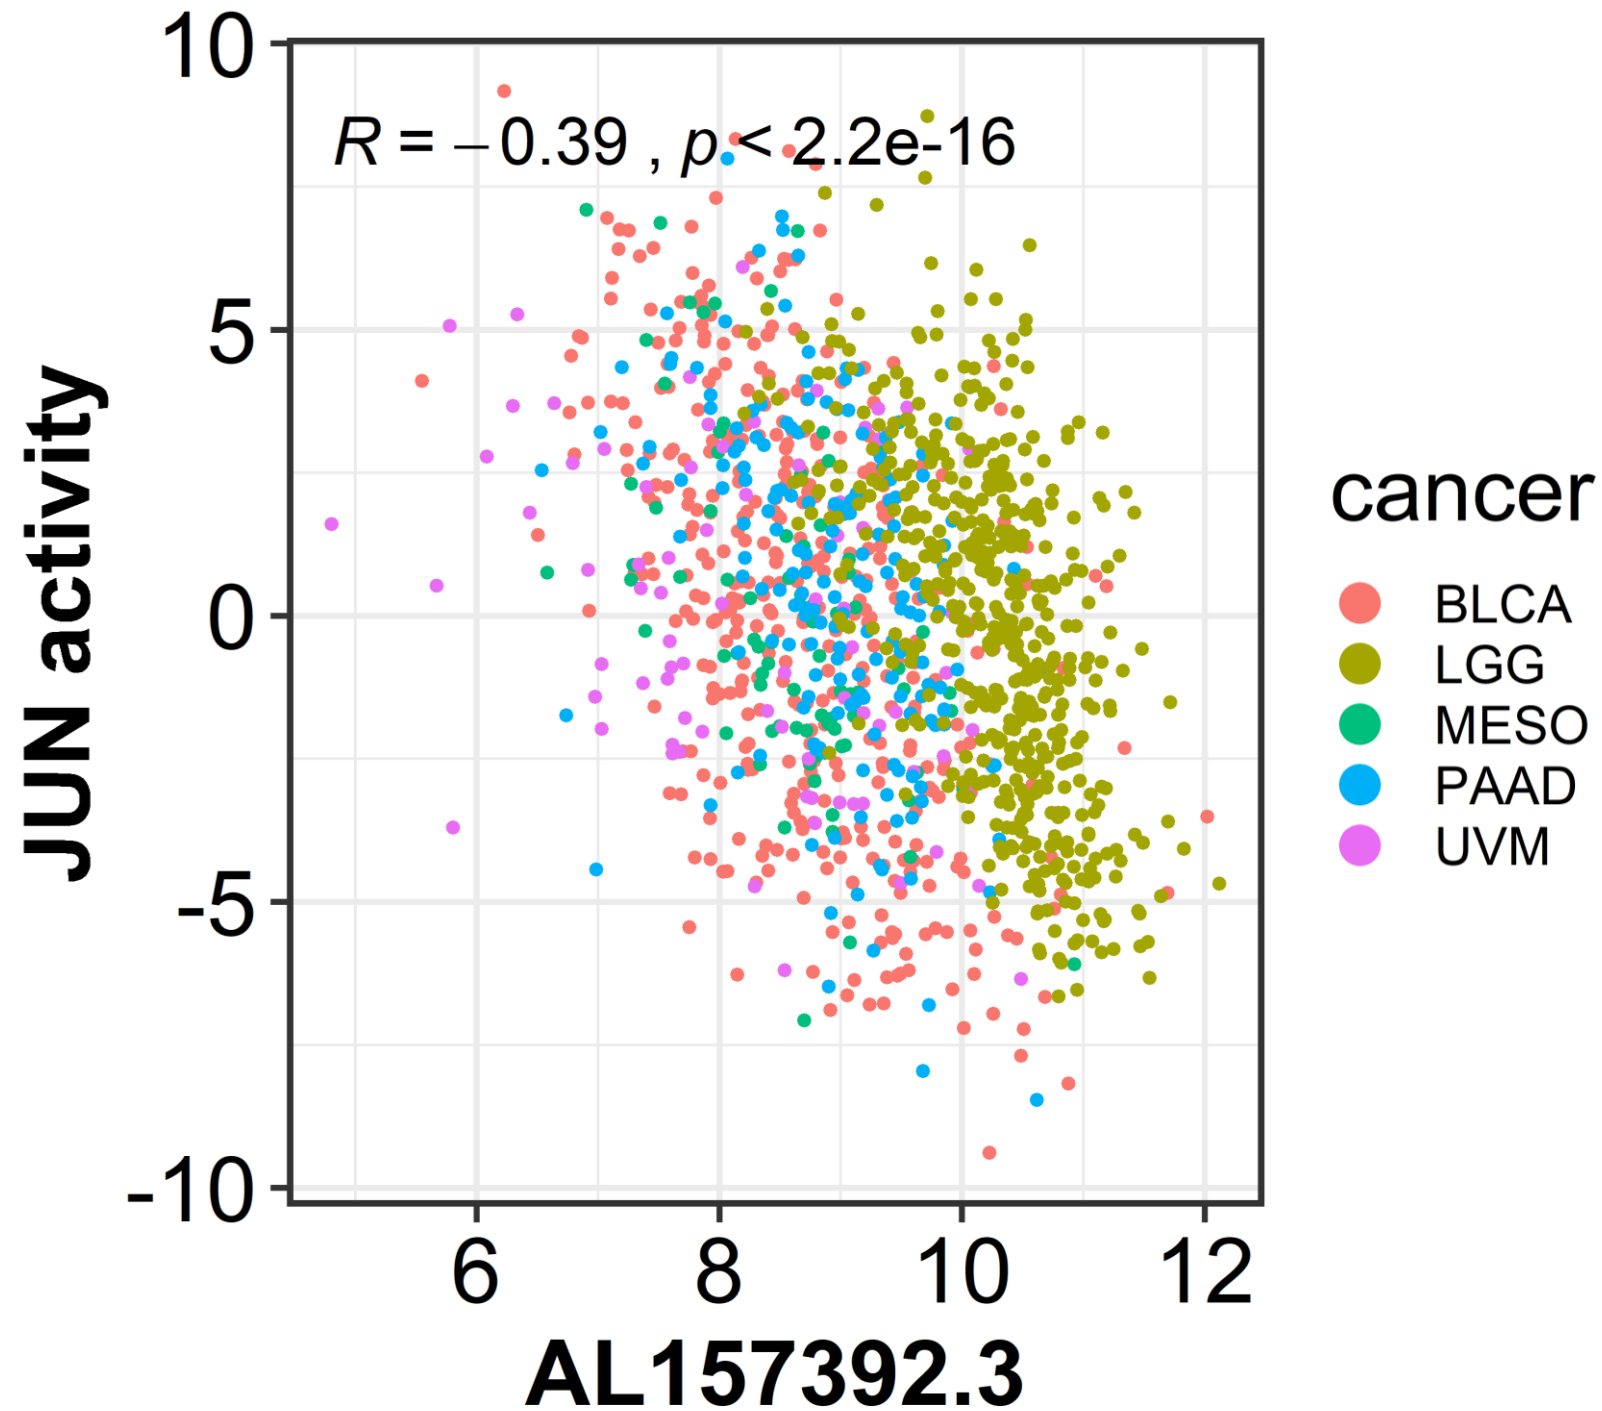

Fig. 5K

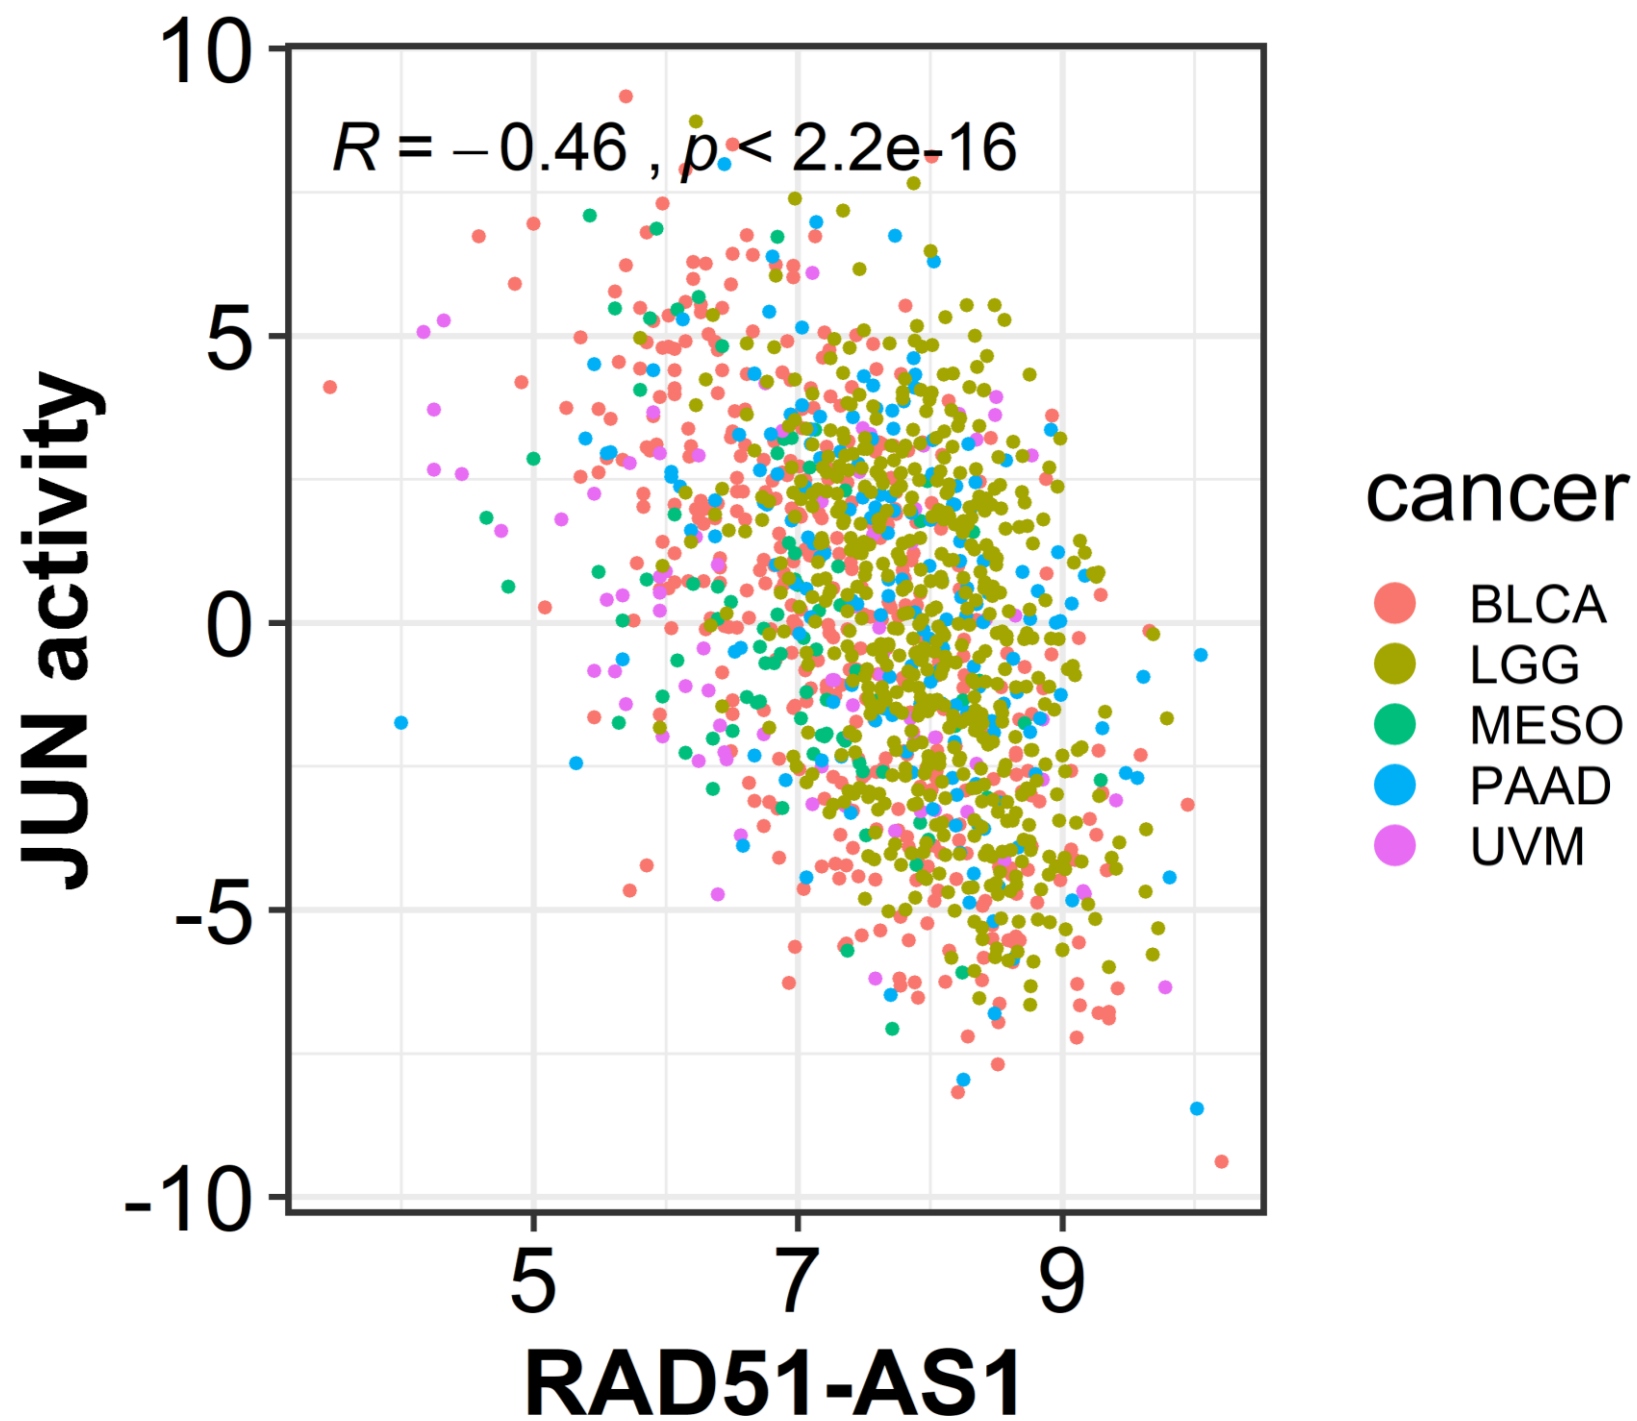

Fig. 5K

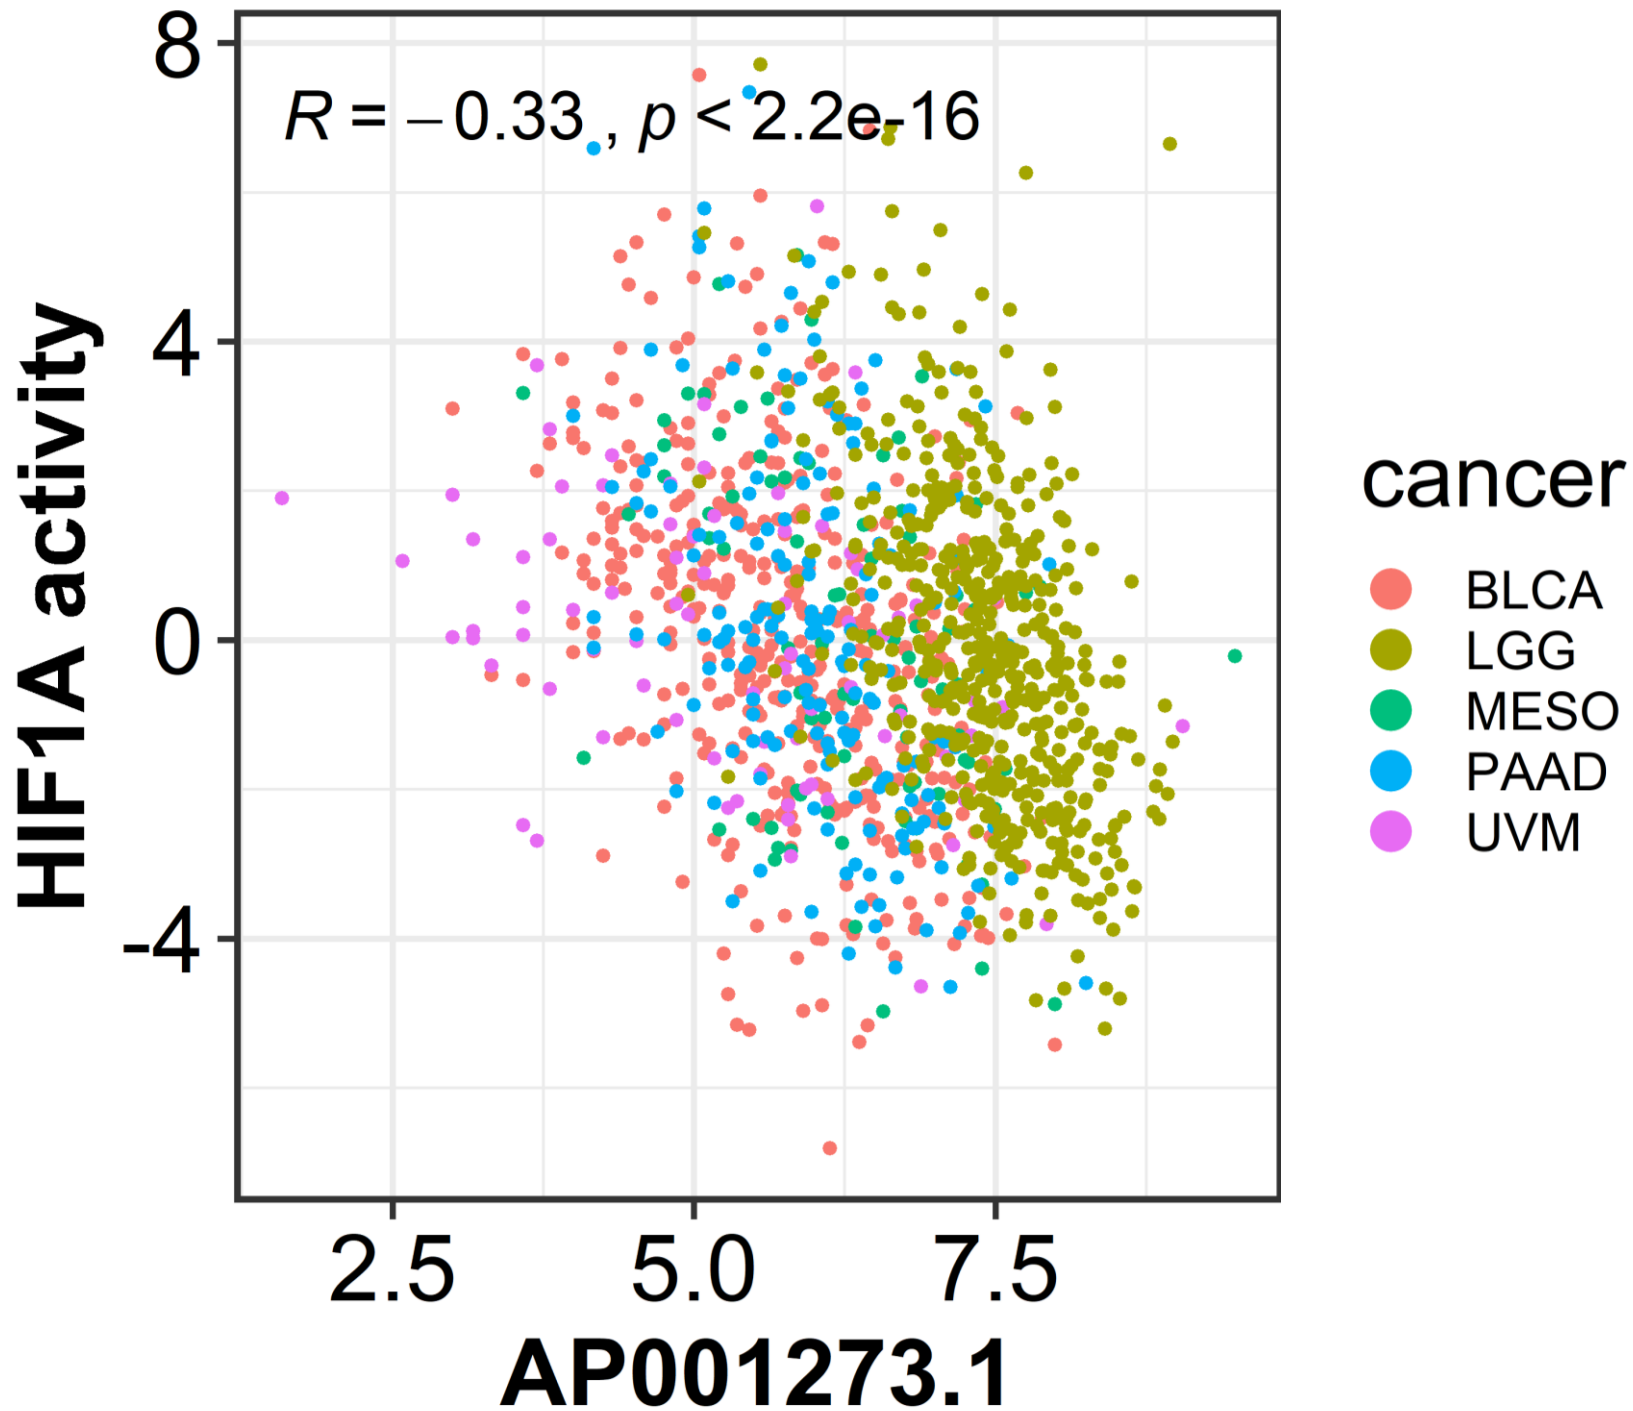



Fig. 5K

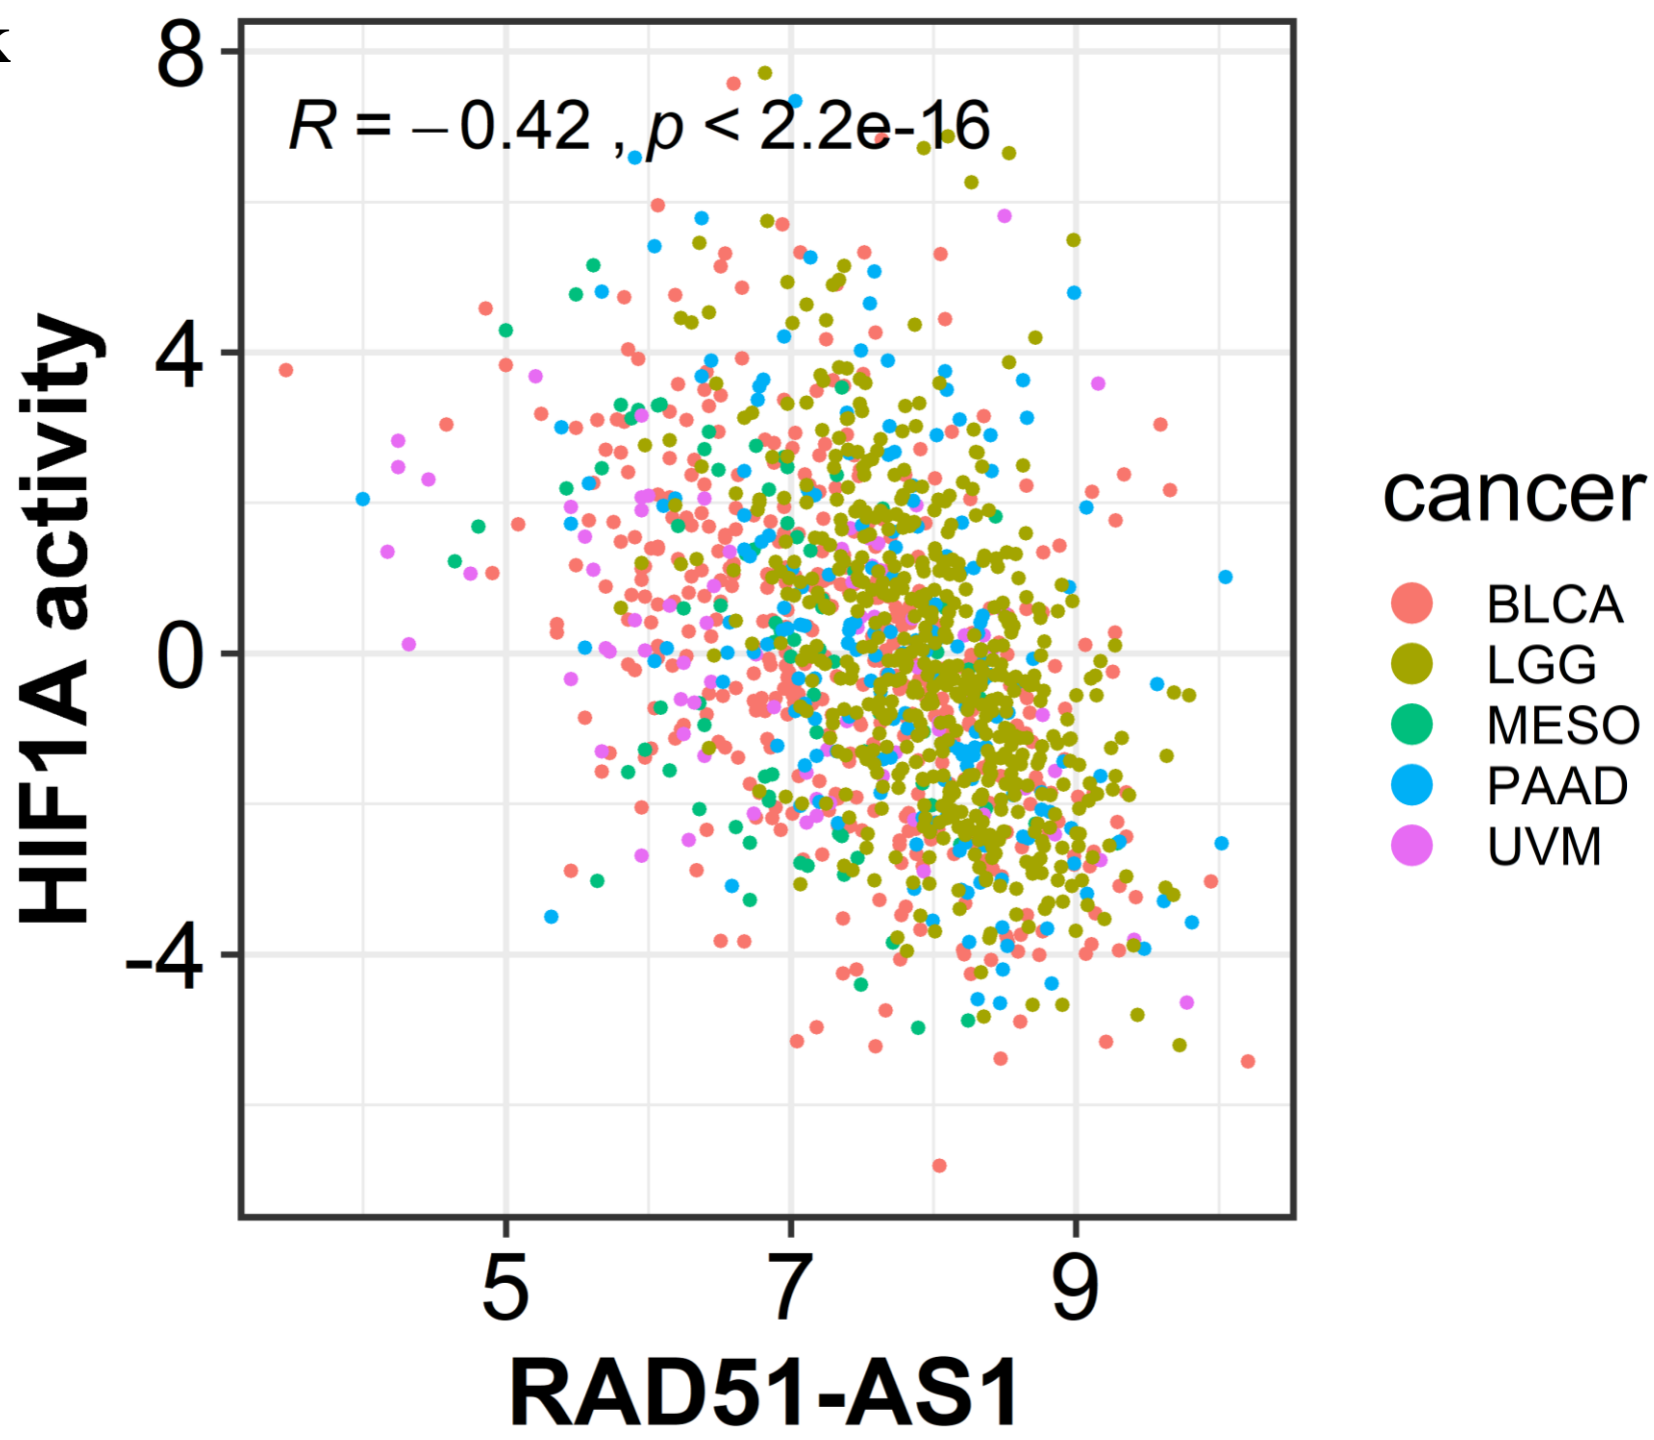

Fig. 5K

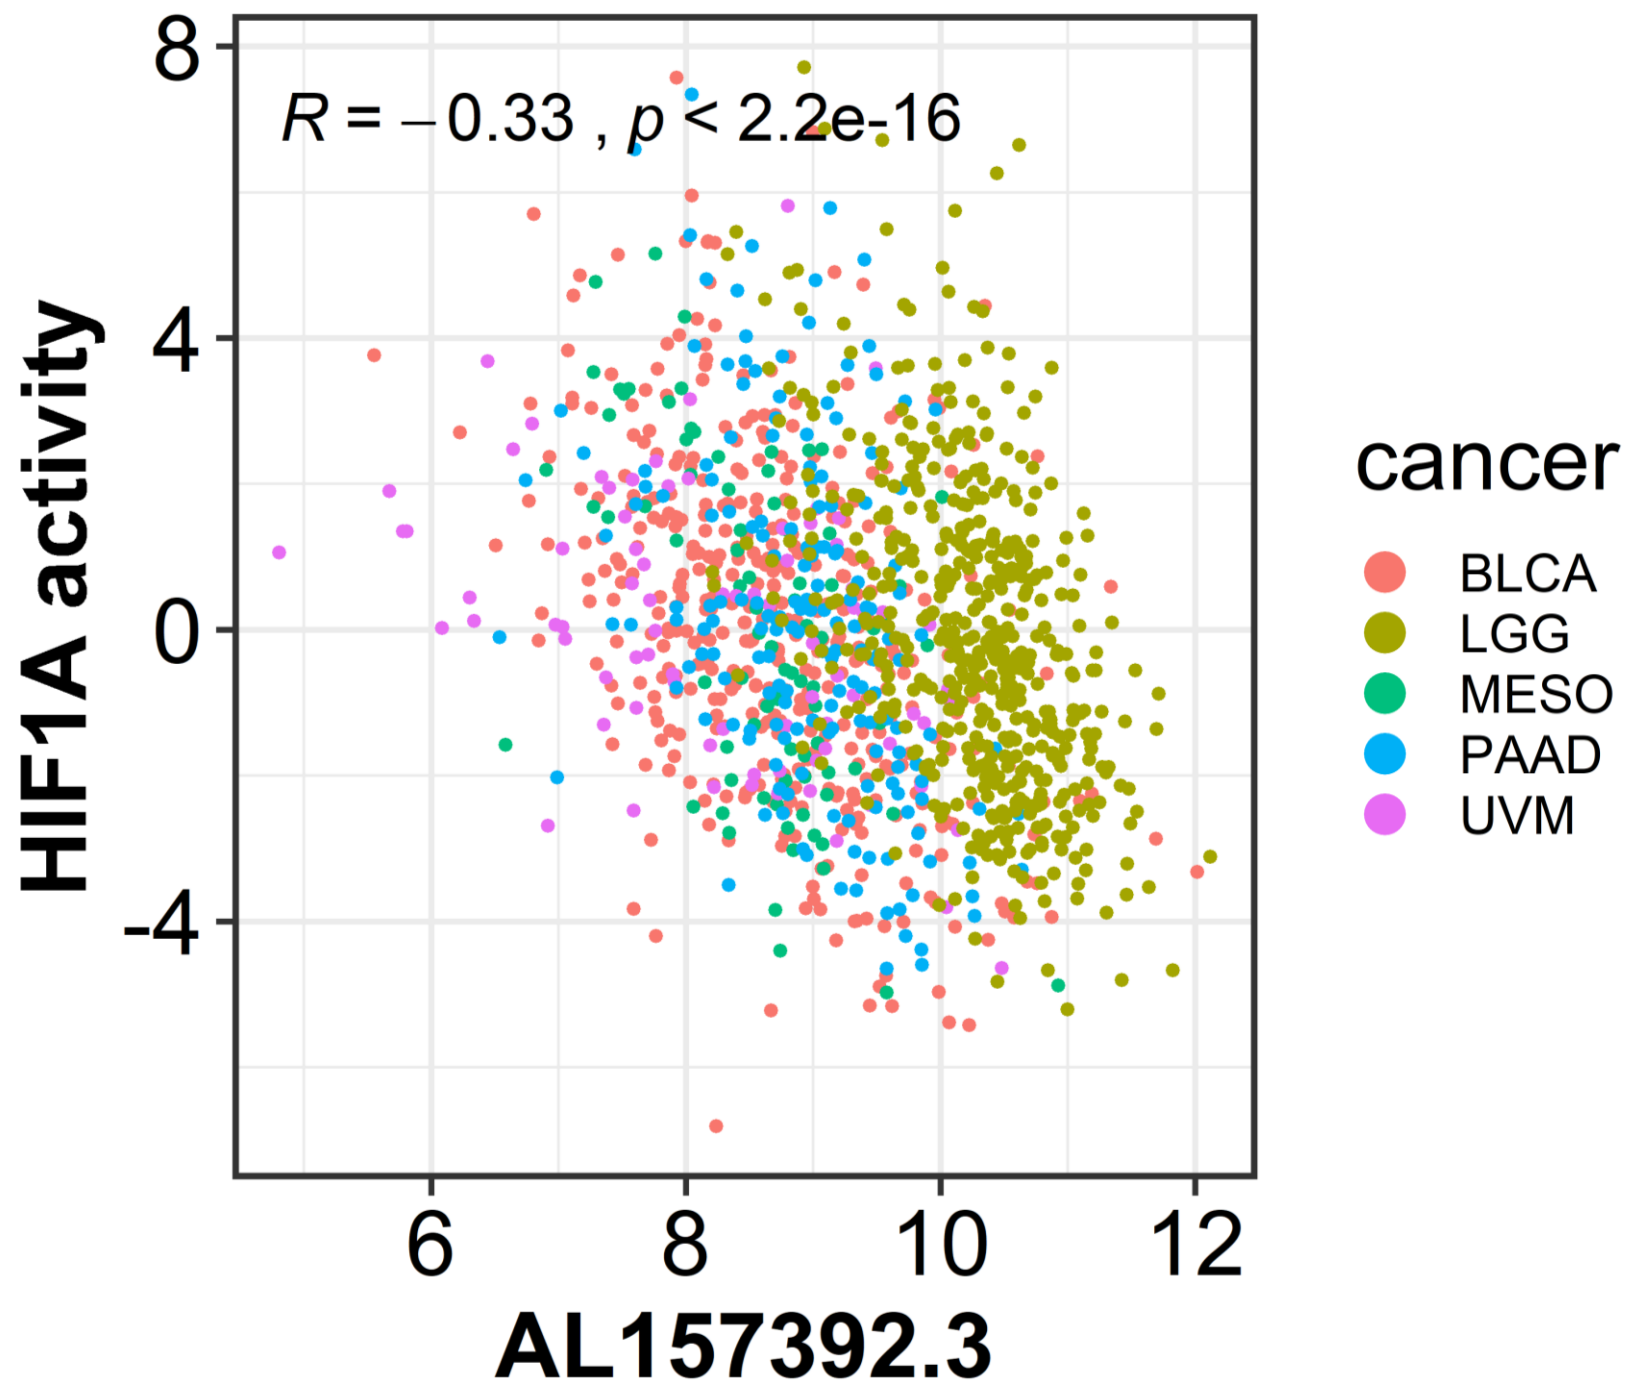

Fig. 5K

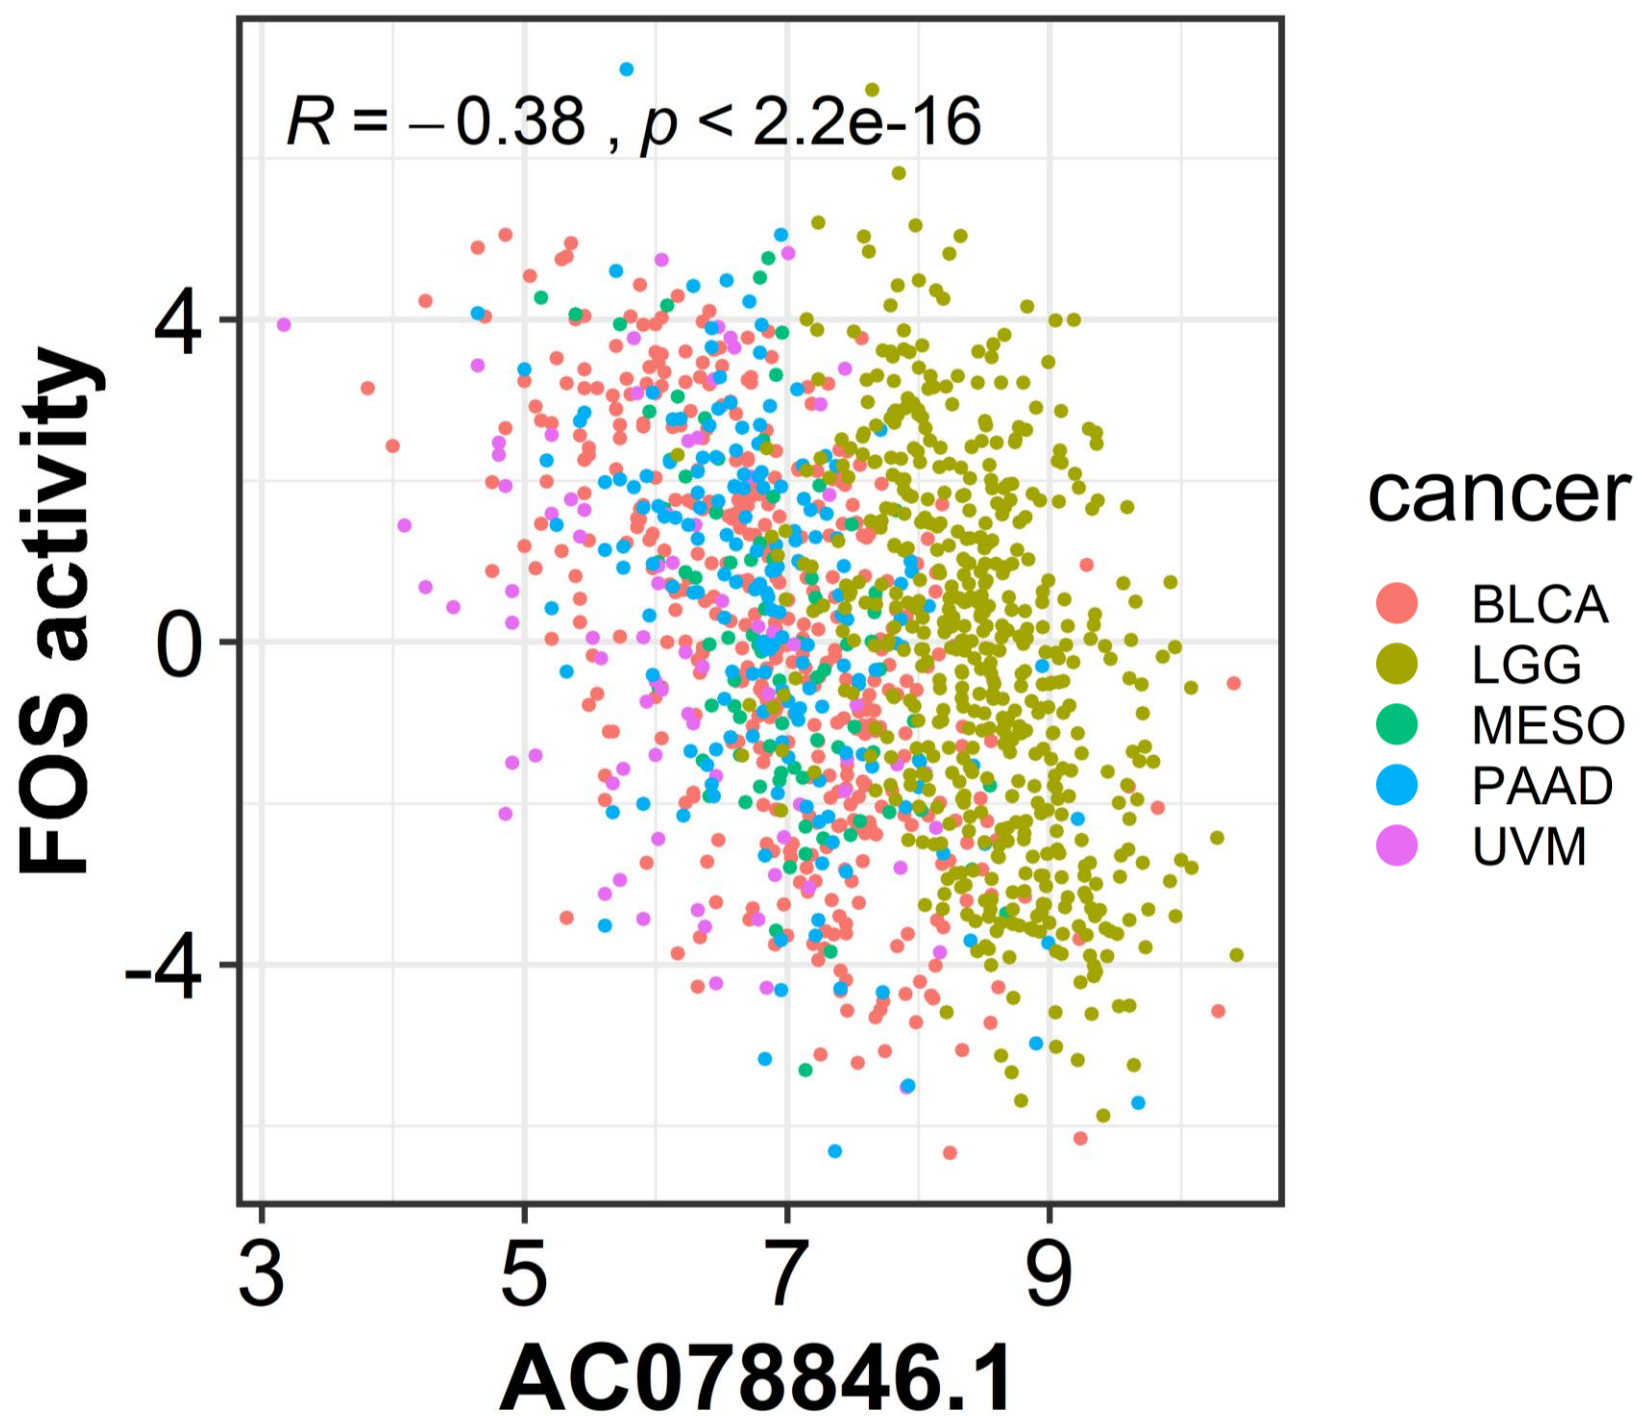

Fig. 5K

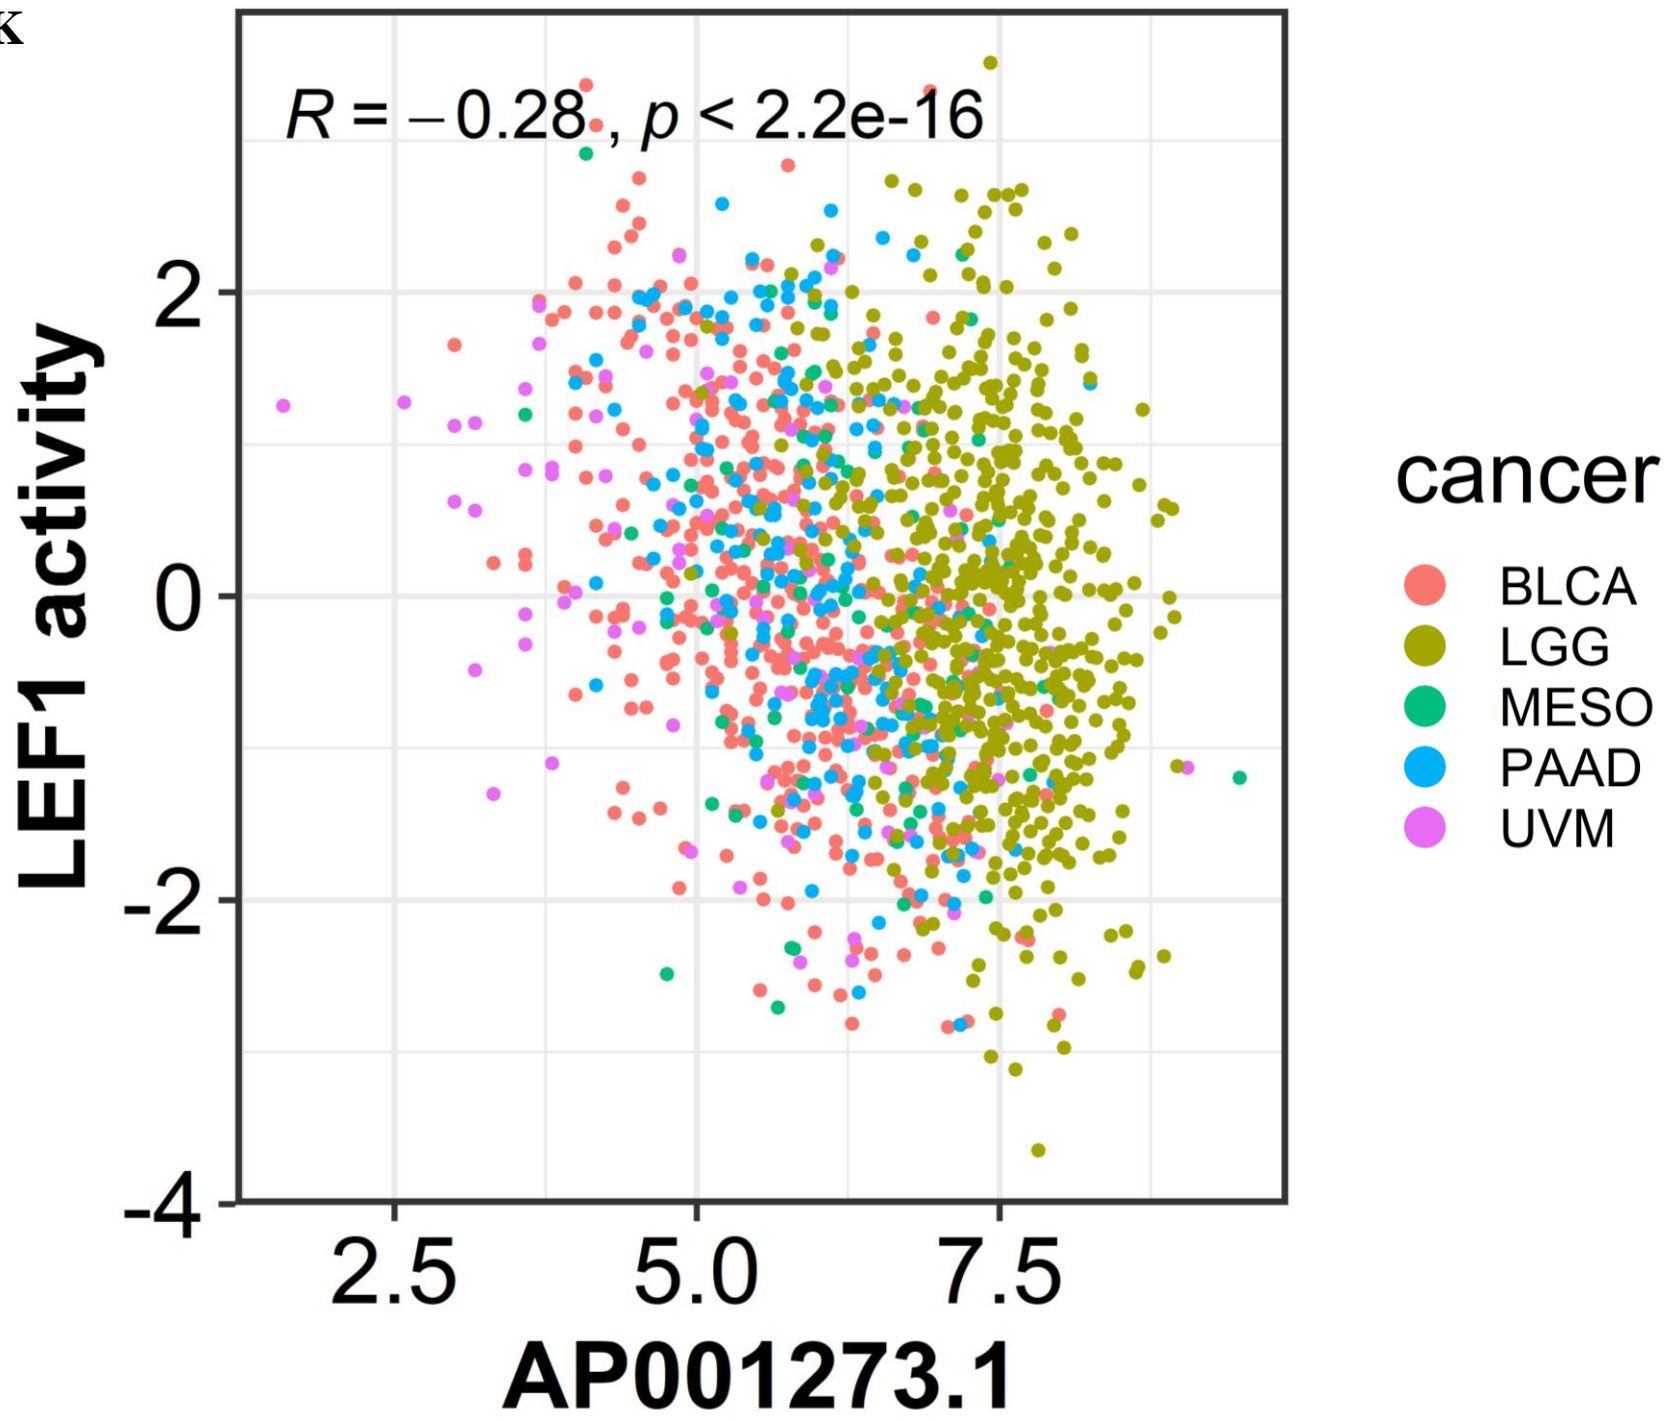

Fig. 6A

# MIR4435-2HG

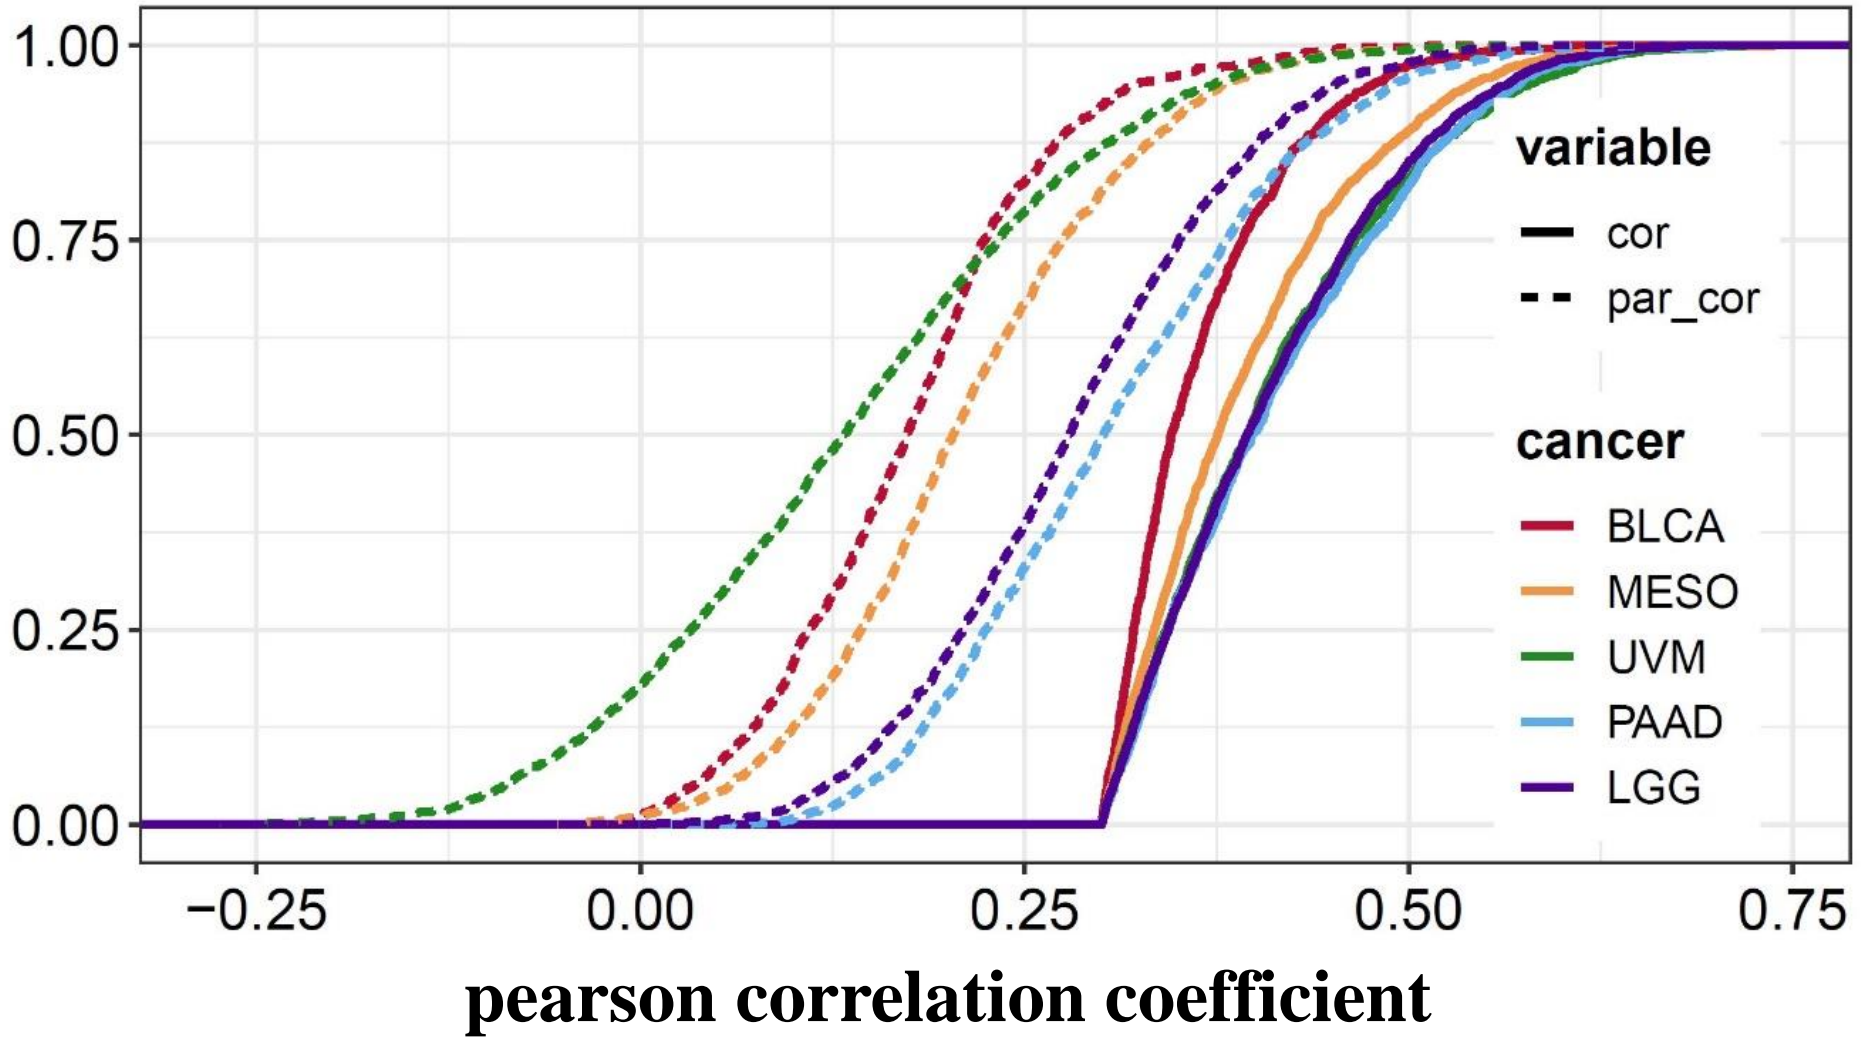





Fig. 6A

# AP001273.1

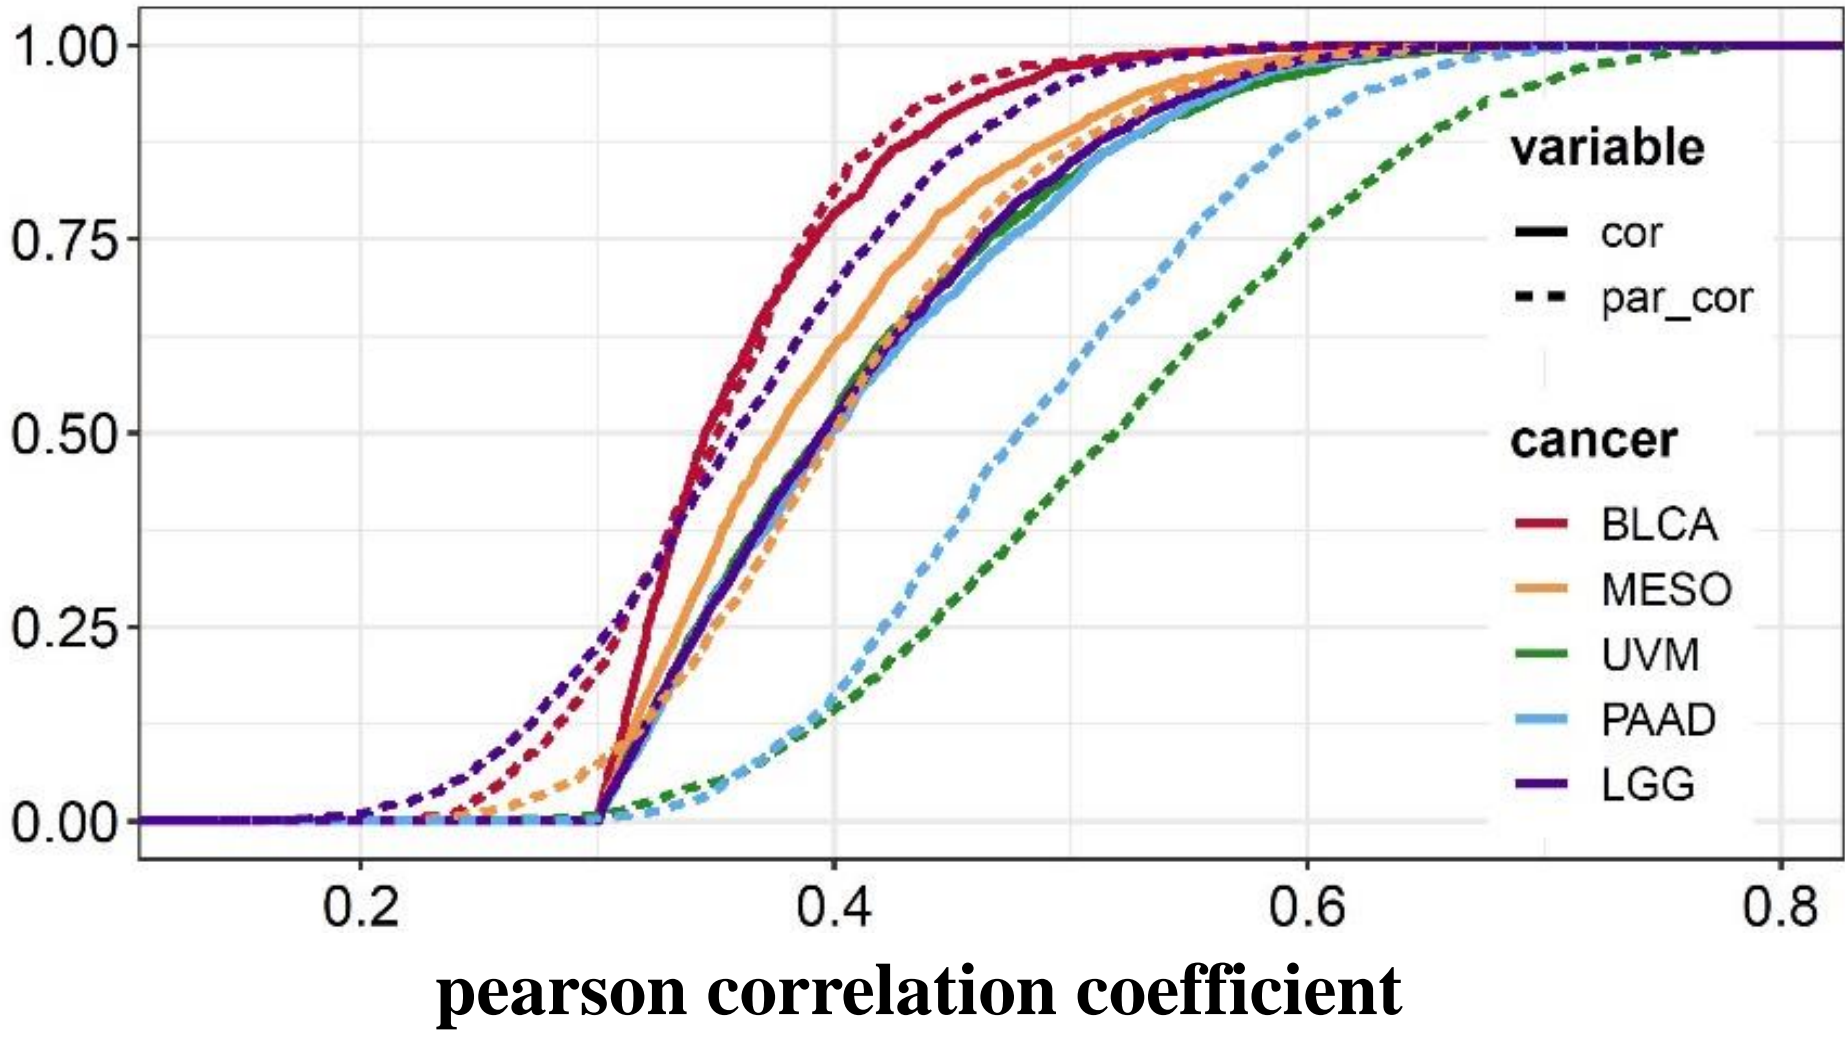





Fig. 6A

# RAD51-AS1

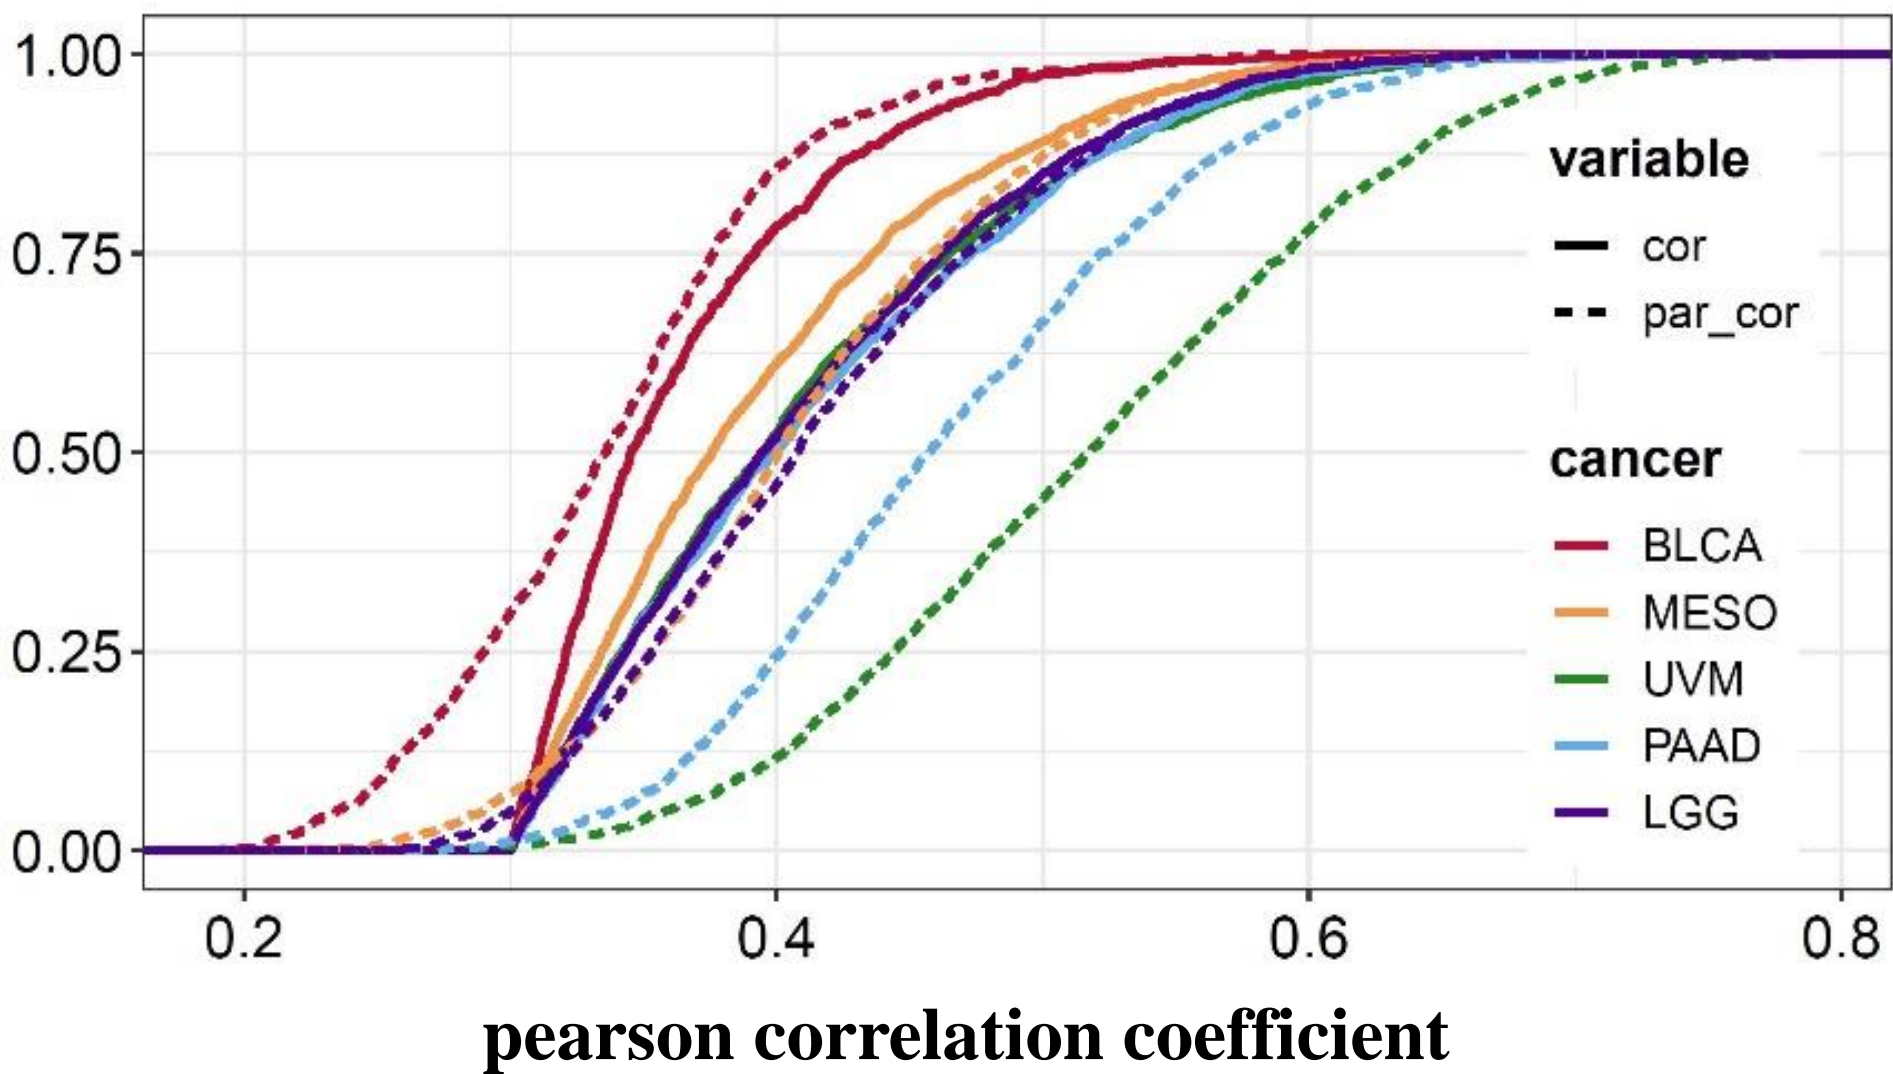

**Fig. 6B**

## **Positive Biological pathway**

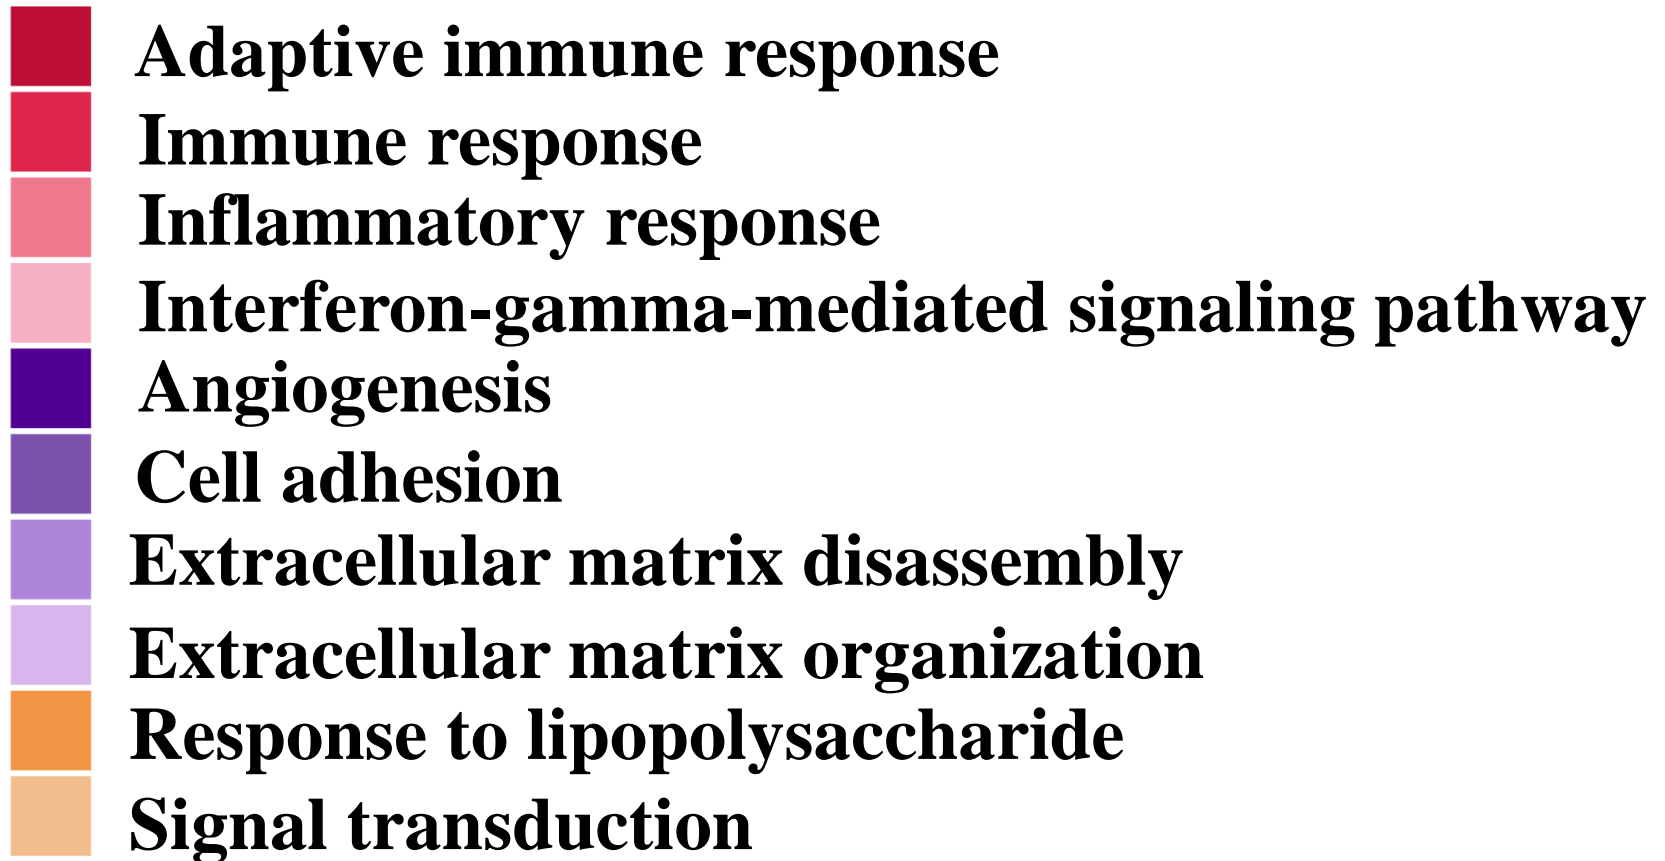

Fig. 6B

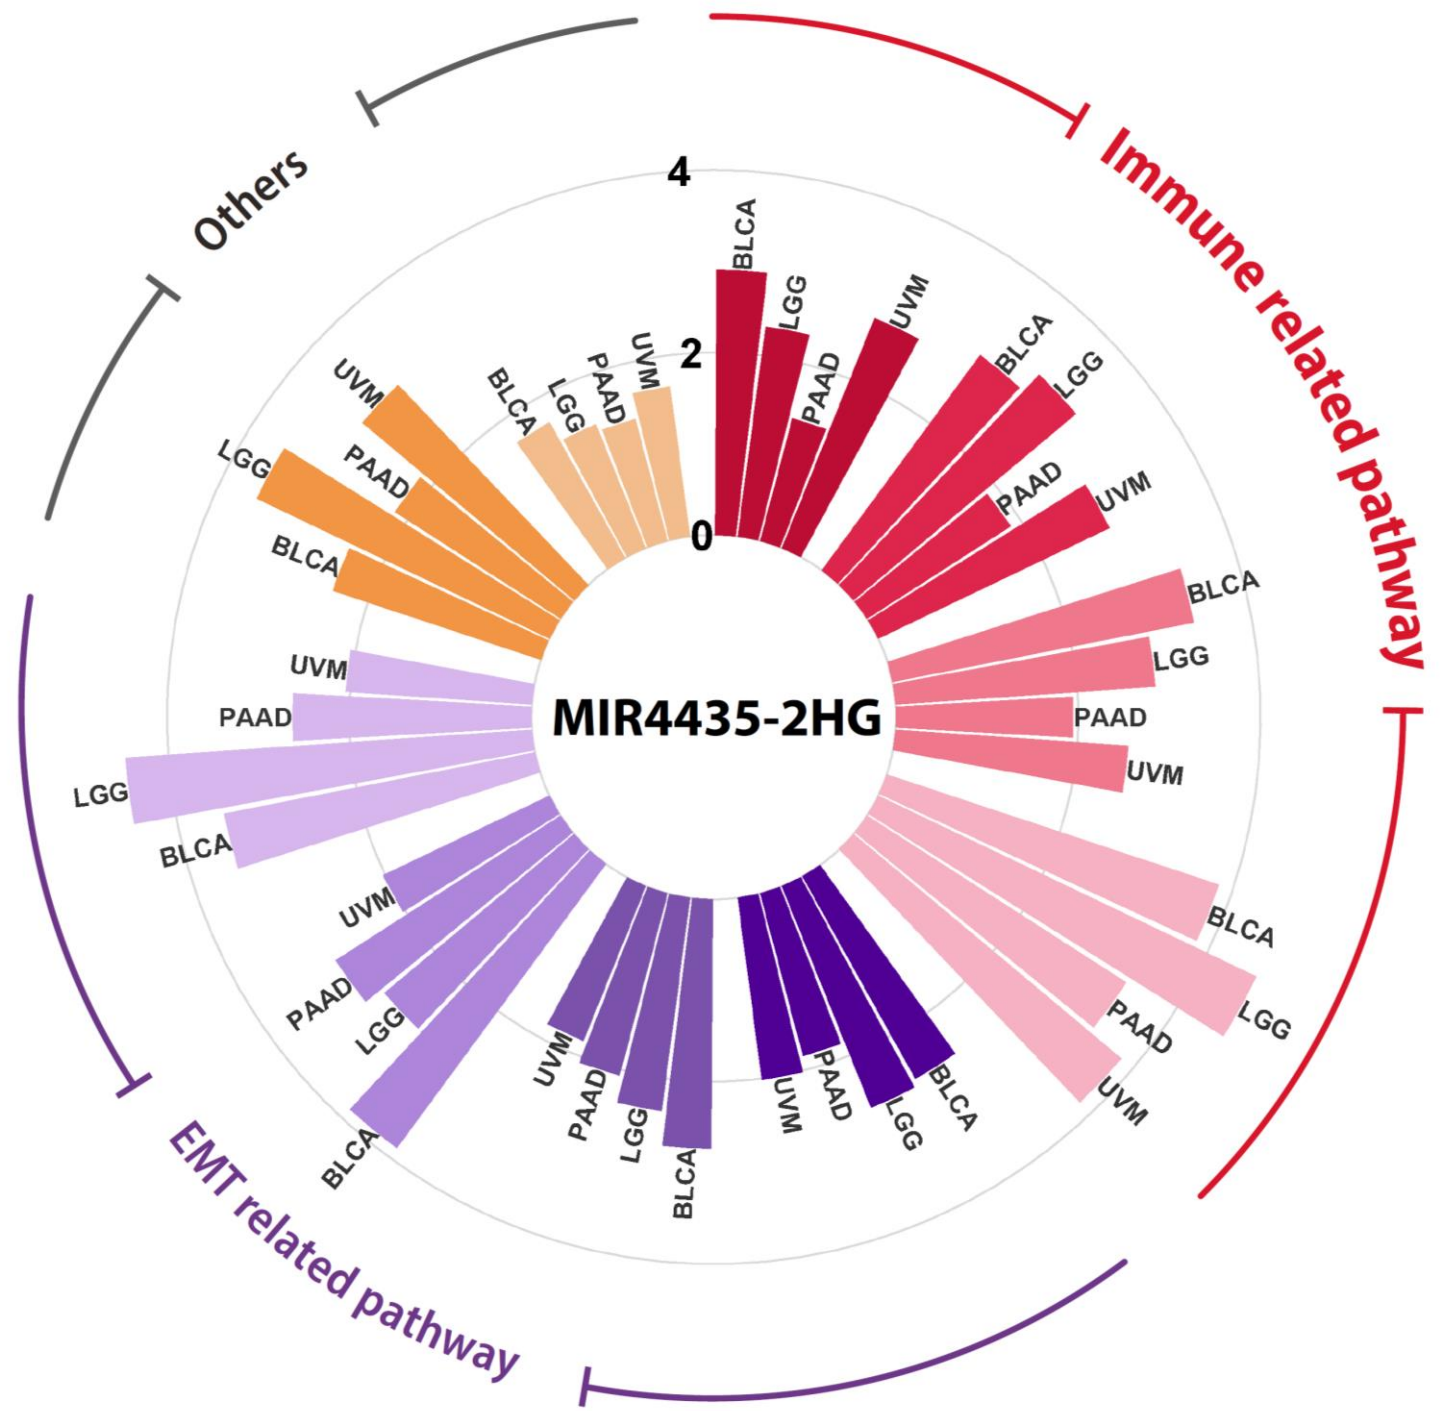

Fig. 6C

# BLCA

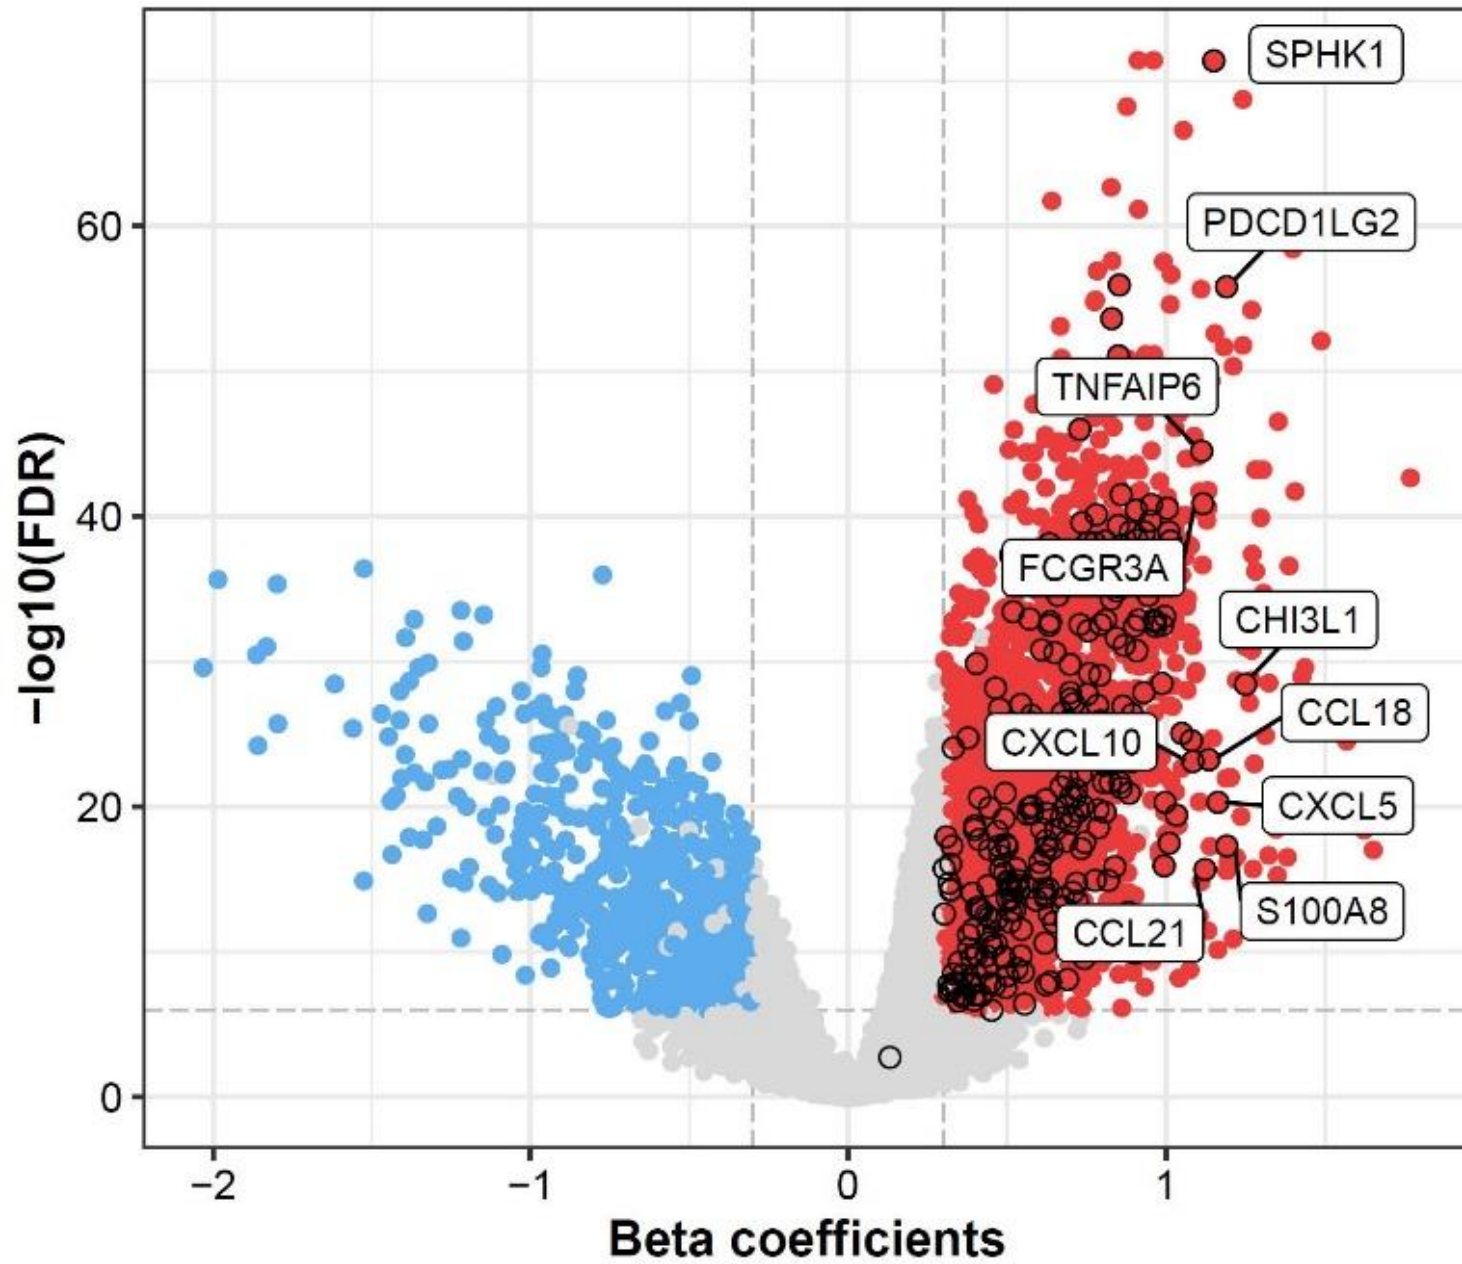



Fig. 6C

# LGG

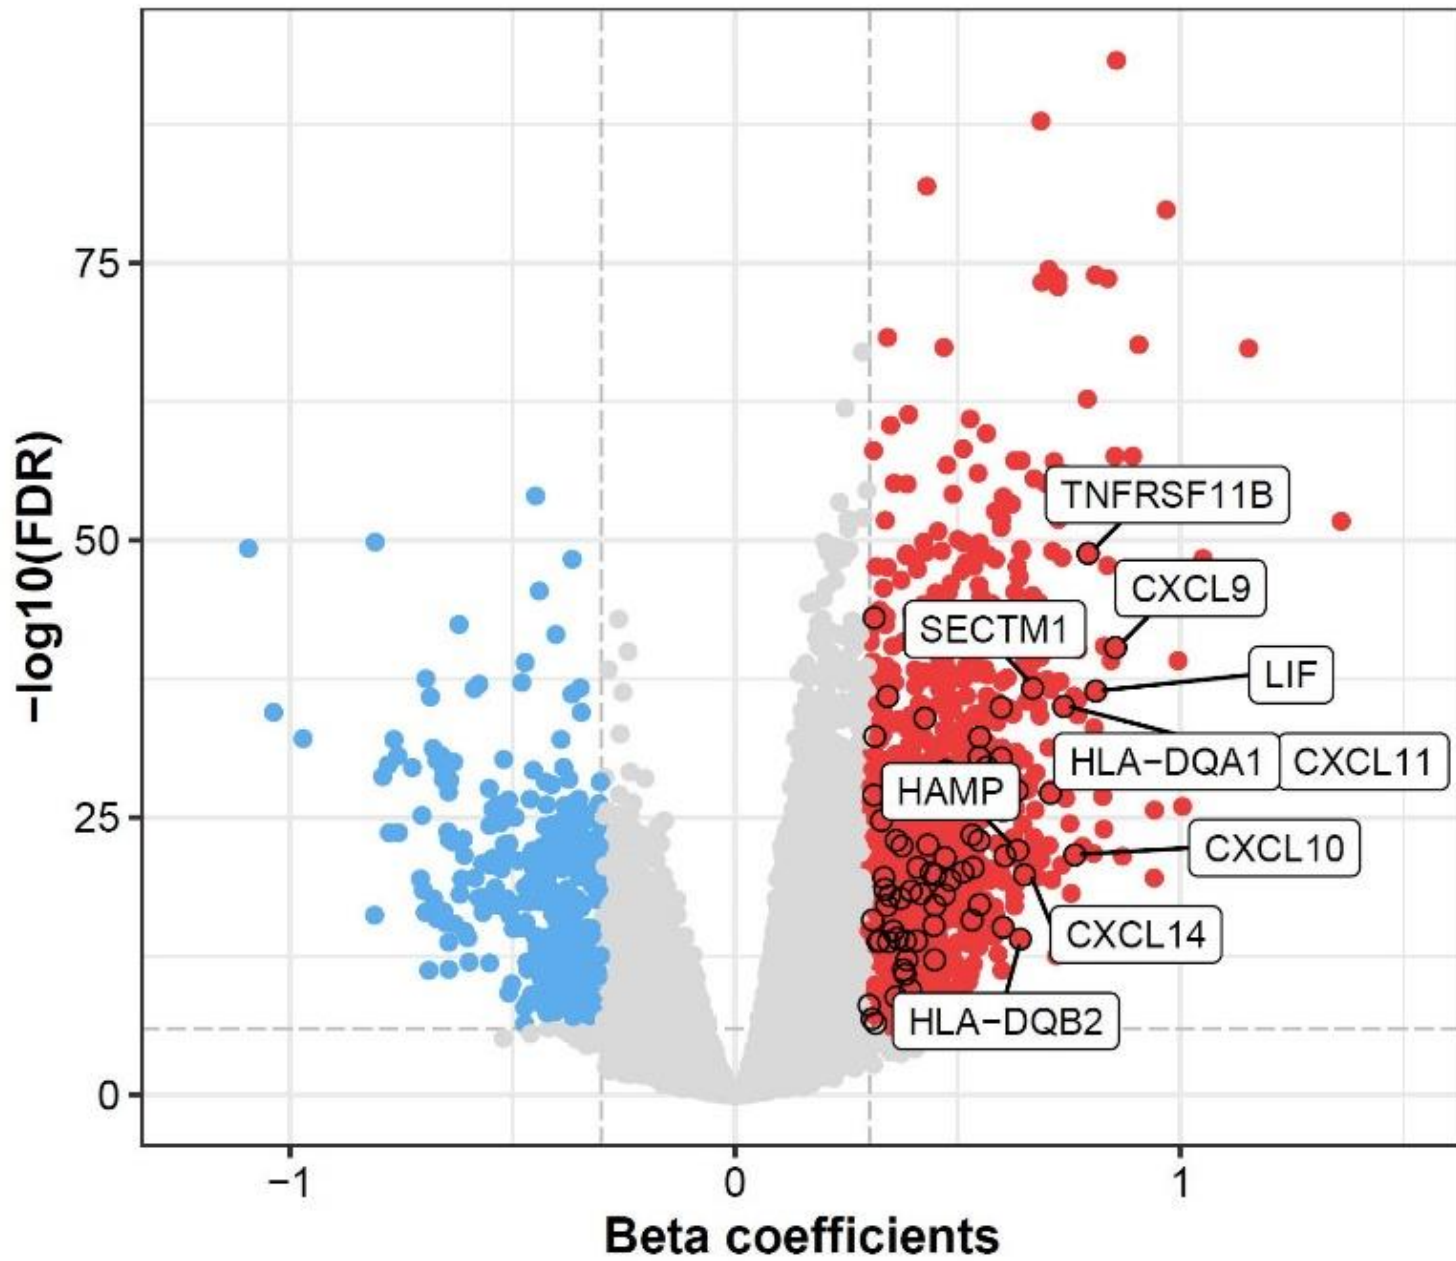

Fig. 6C

# PAAD

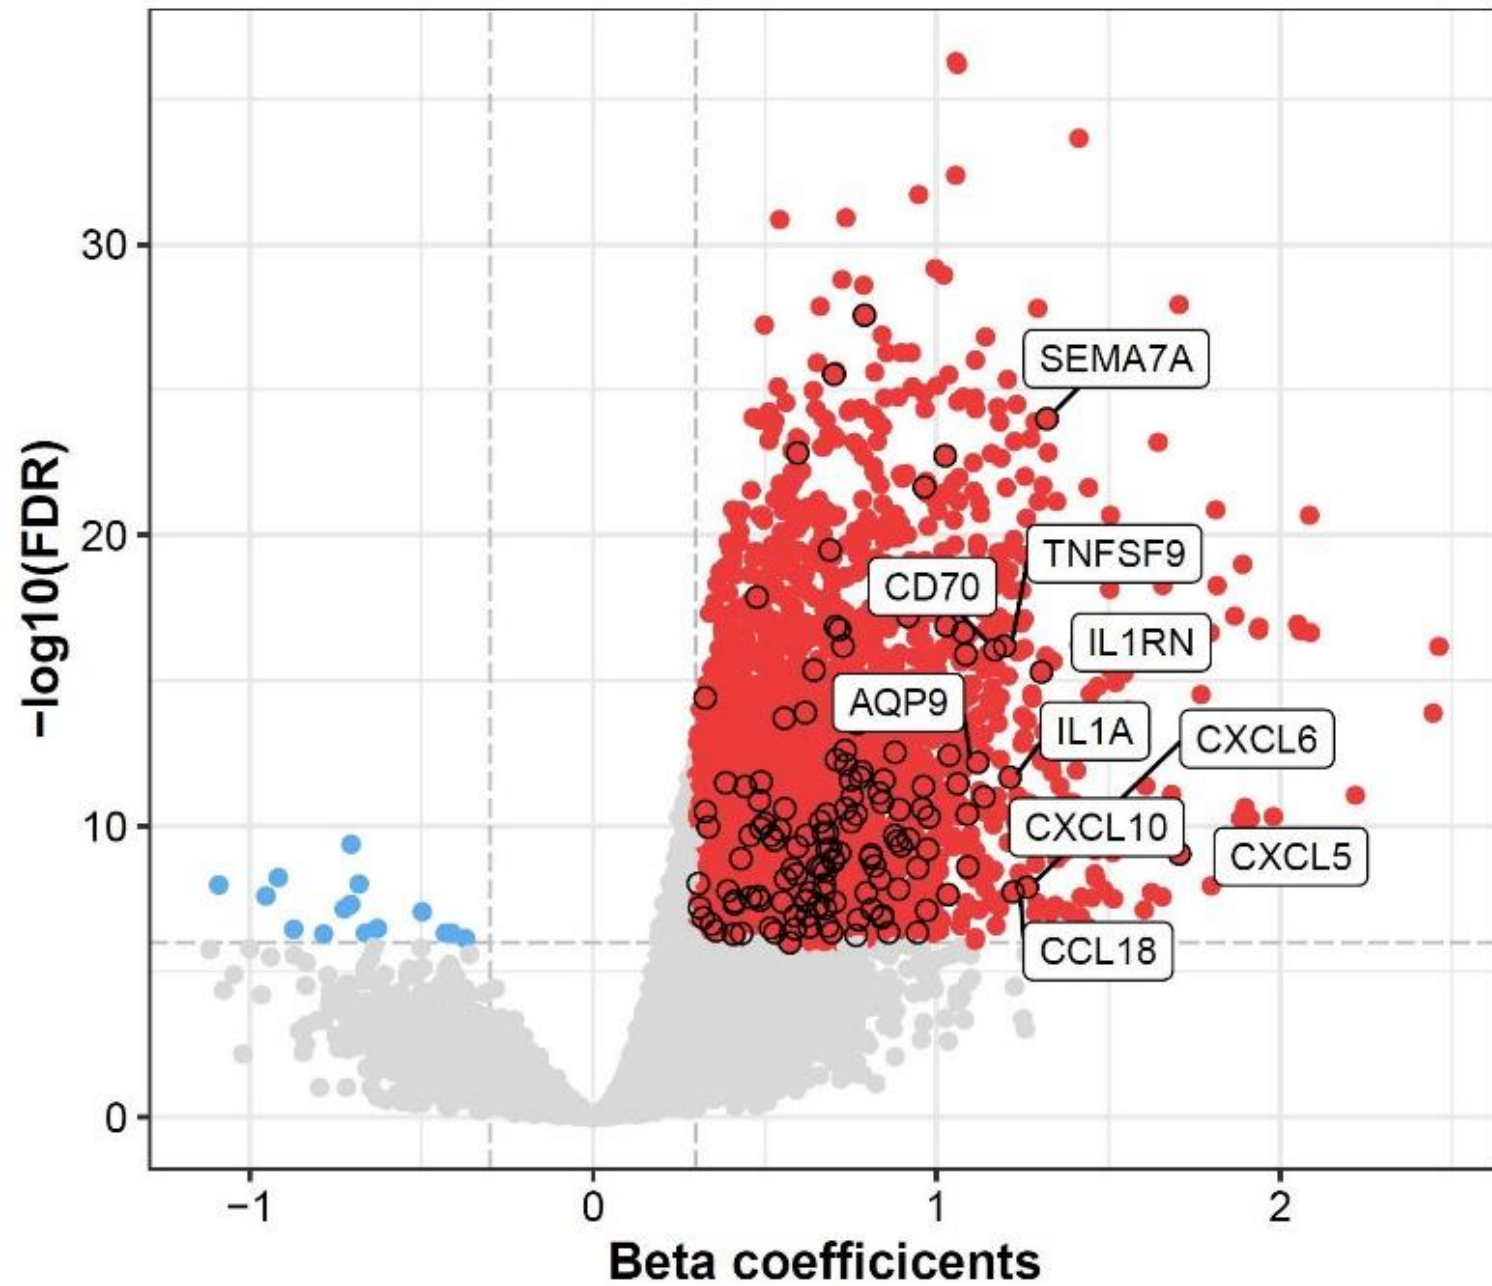



Fig. 6C

# UVM

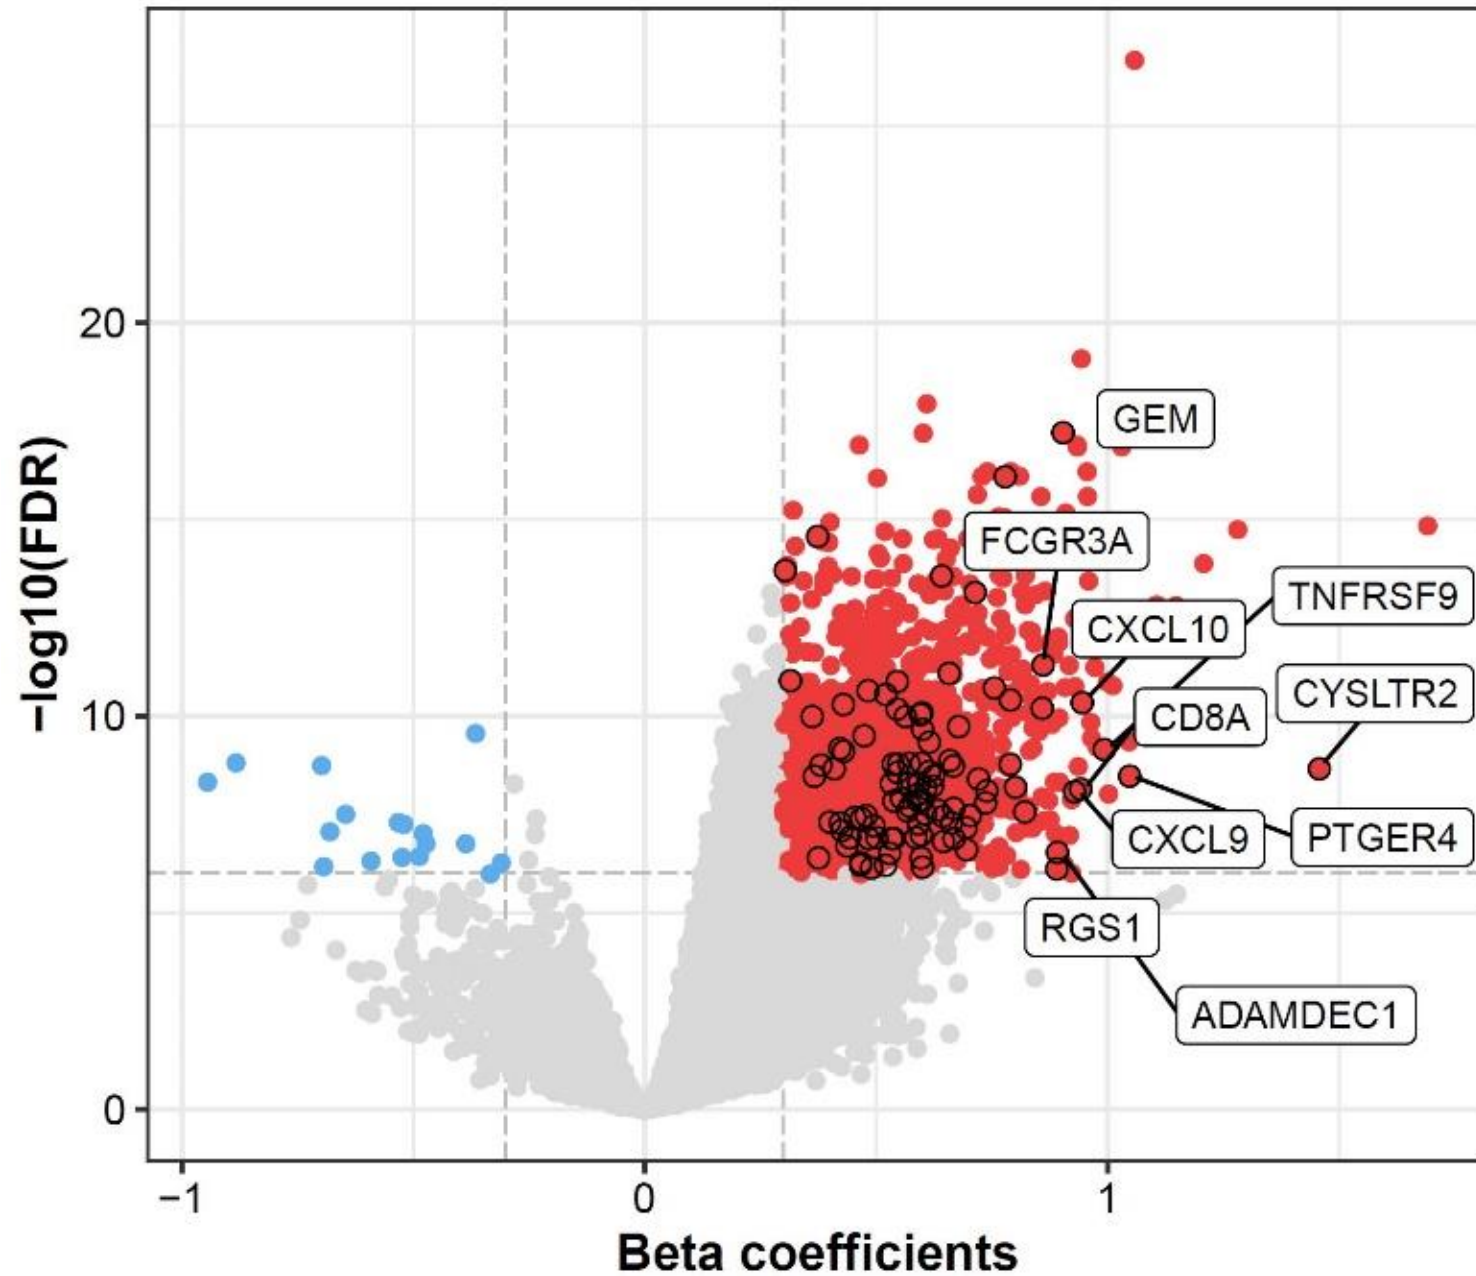

Supplement: MOESM13 [file 18903798]
