# Supplementary material for: Glycolysis-associated lncRNAs identify a subgroup of cancer patients with poor prognoses and a high-infiltration immune microenvironment
Source: Springer Nature journal article supplement (doi:10.1186/s12916-021-01925-6), 2021-02-25

**Supple. Fig. 1**

# BLCA

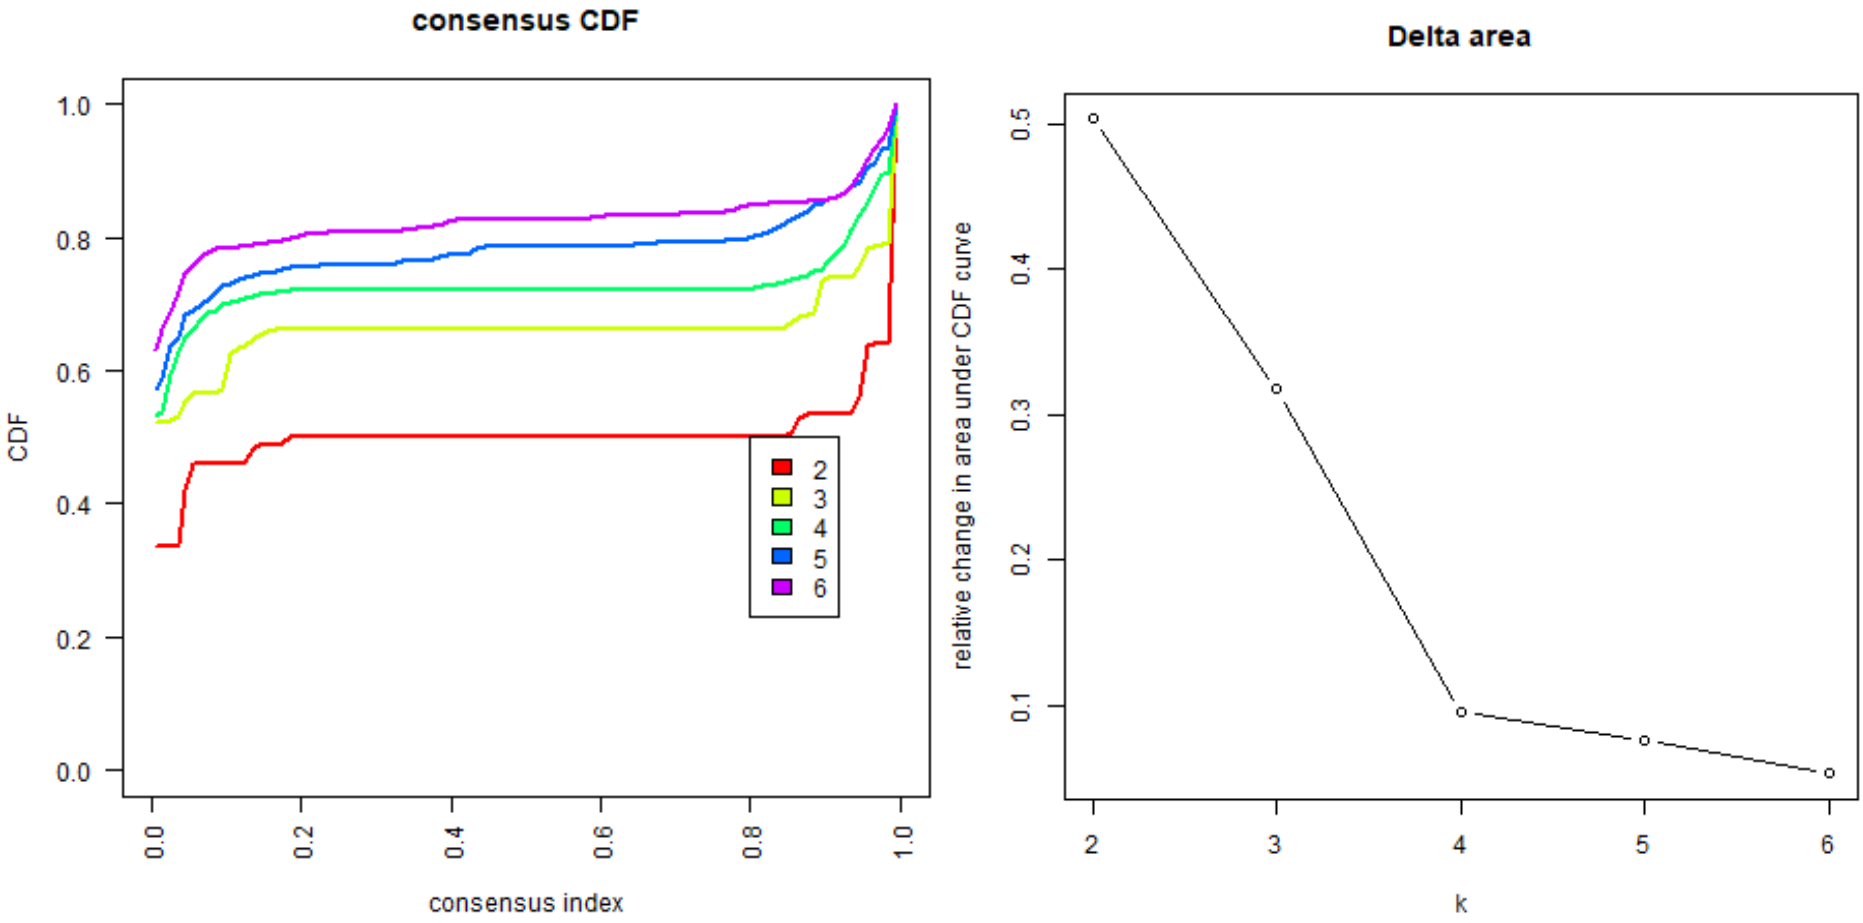

**Supplemental Fig. 1. The consensus cumulative distribution function (CDF) and delta area for five cancer types.**

Supple. Fig. 1

# LGG

consensus CDF

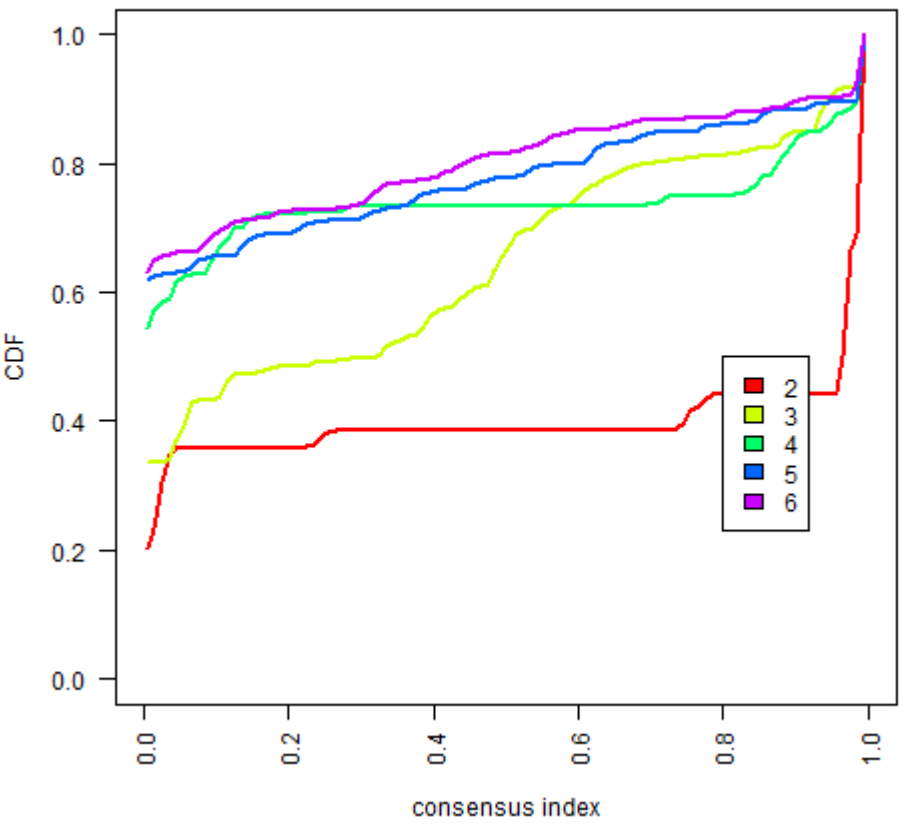

Delta area

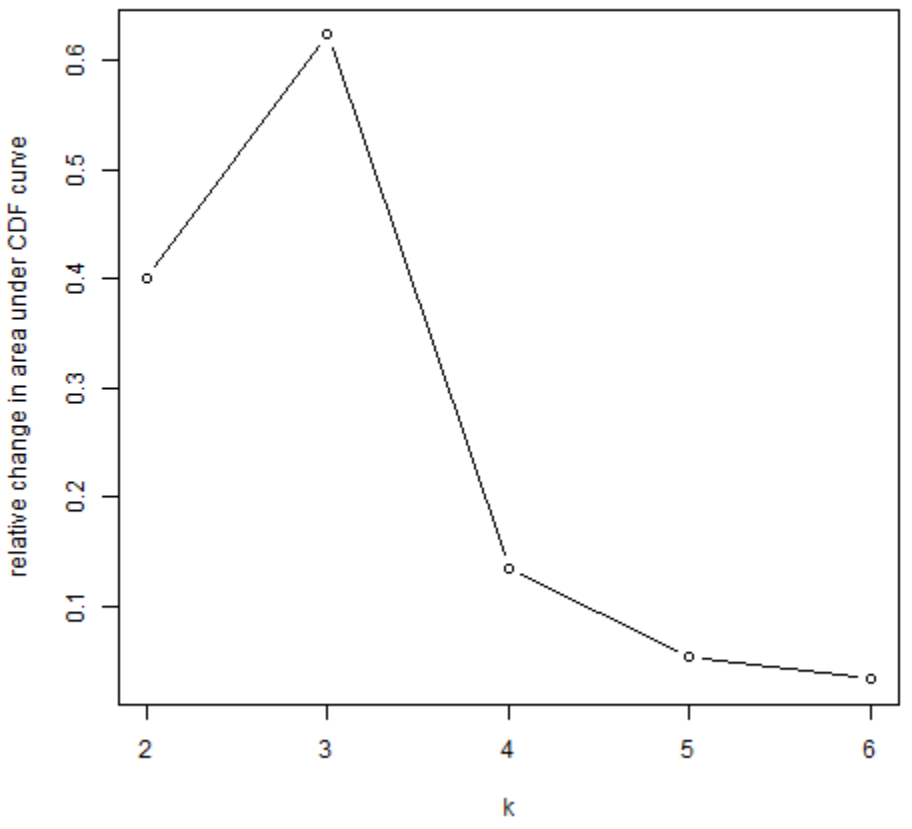

Supple. Fig. 1

# MESO

consensus CDF

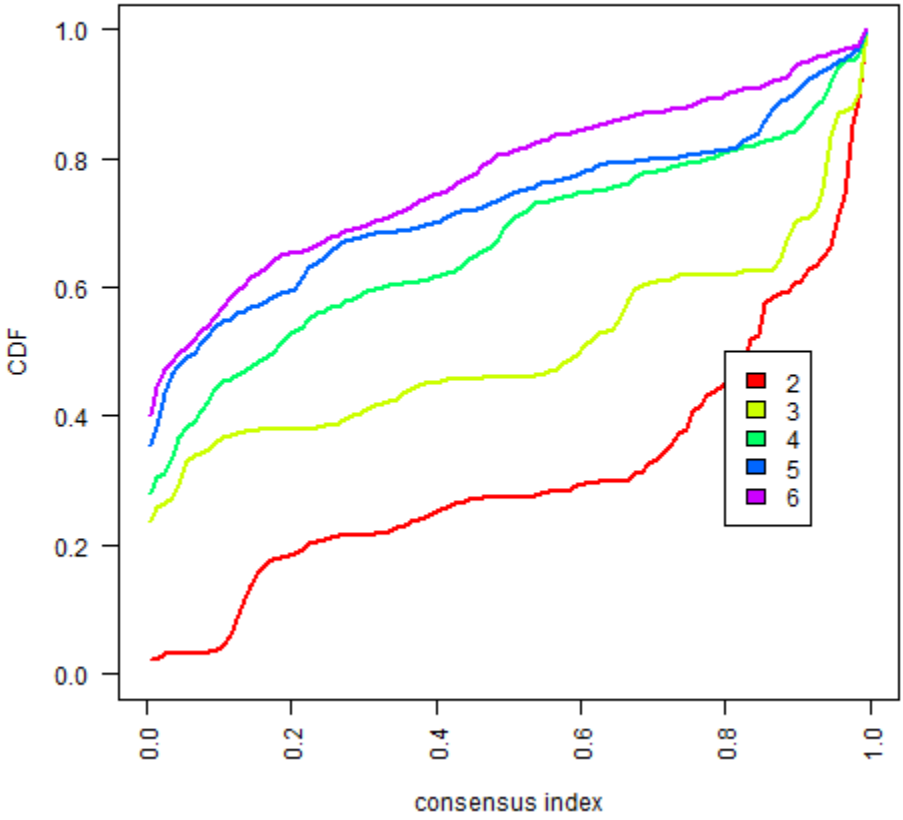

Delta area

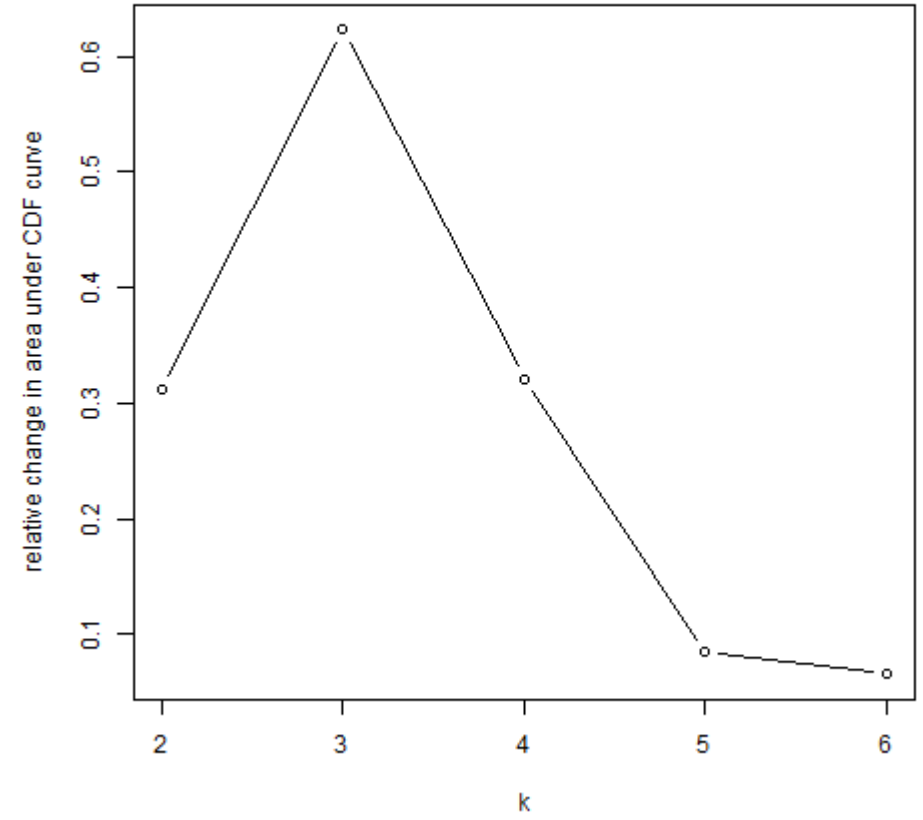

Supple. Fig. 1

# PAAD

consensus CDF

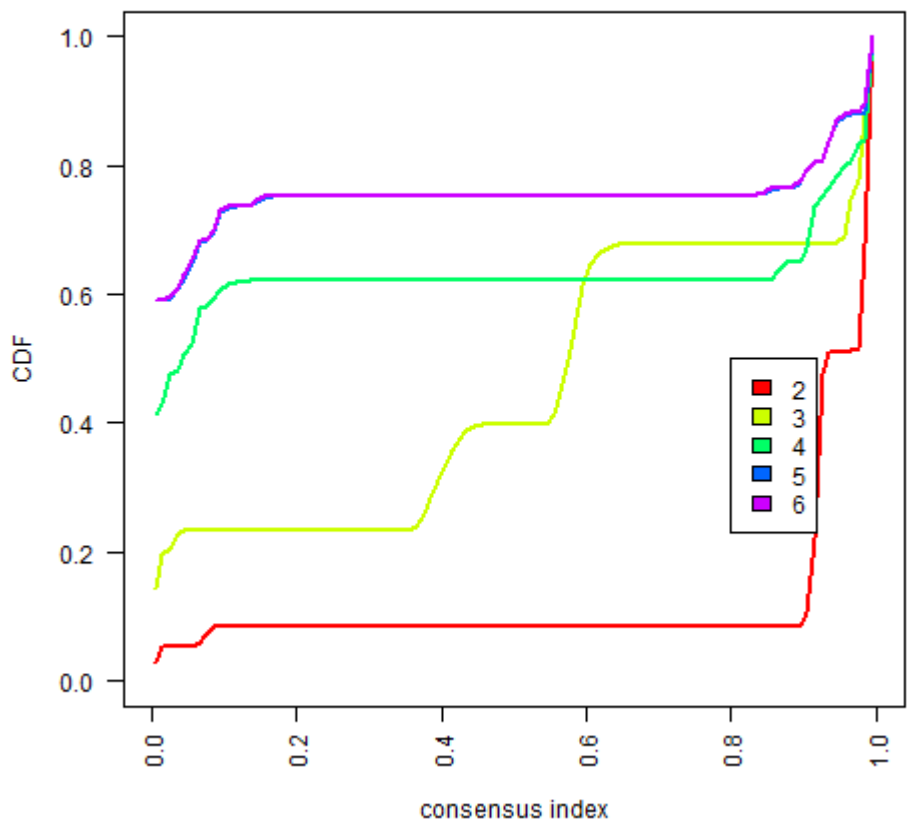

Delta area

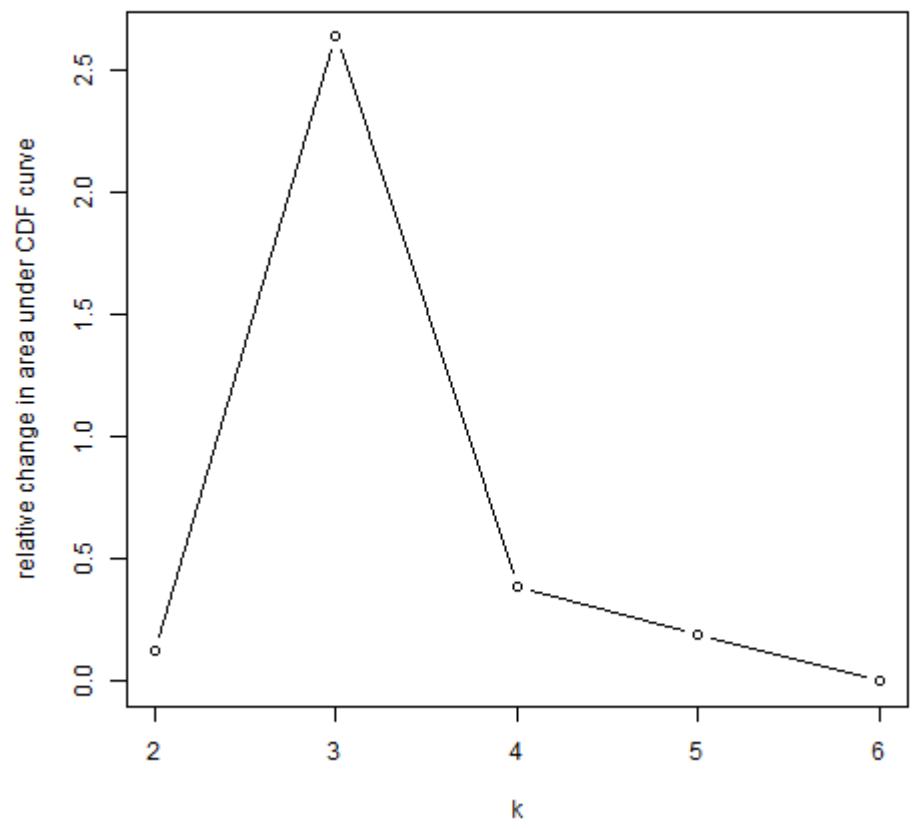

Supple. Fig. 1

# UVM

consensus CDF

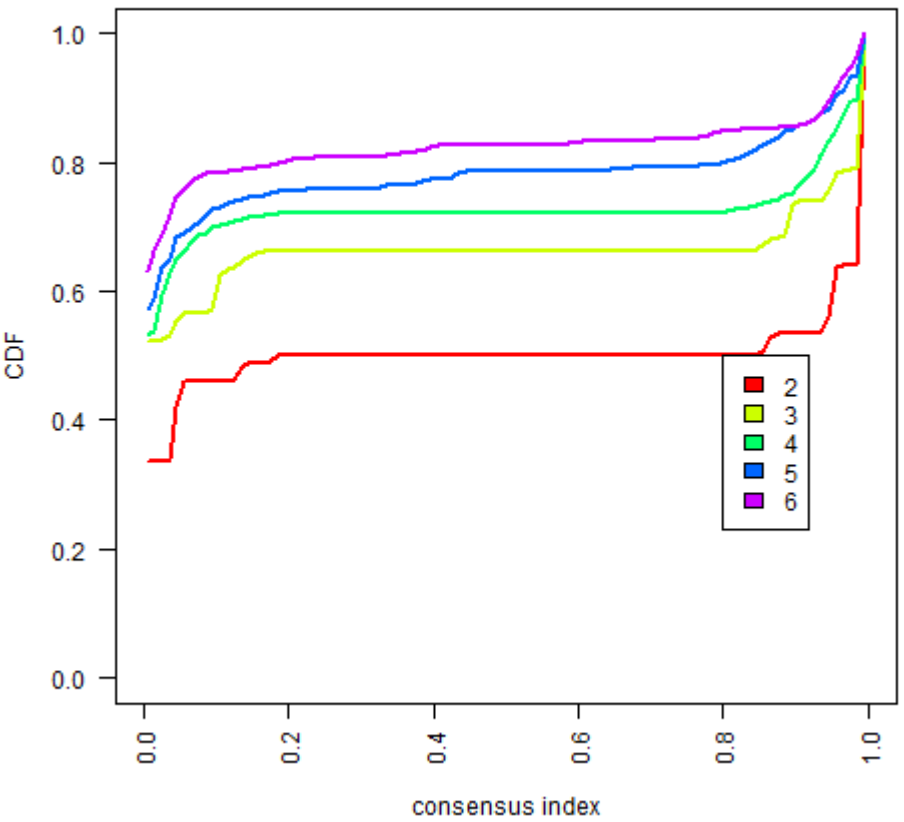

Delta area

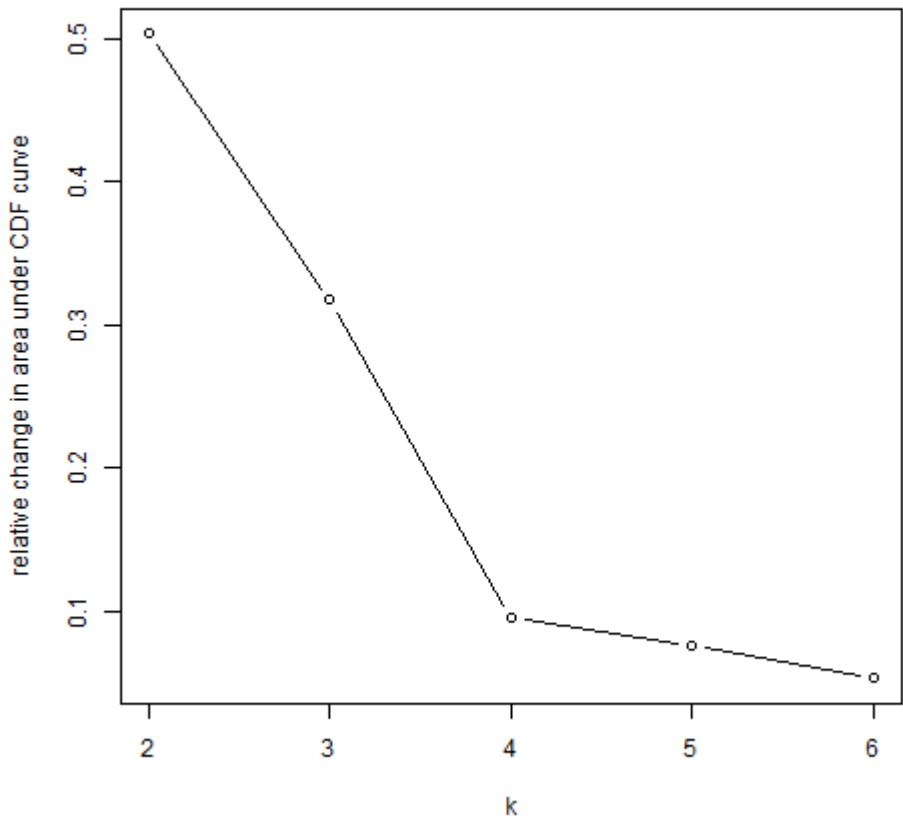

Supplement: MOESM2 [file 18903798]
