# Supplementary material for: Glycolysis-associated lncRNAs identify a subgroup of cancer patients with poor prognoses and a high-infiltration immune microenvironment
Source: Springer Nature journal article supplement (doi:10.1186/s12916-021-01925-6), 2021-02-25
Supplement: MOESM6 [file 18903798]

**Supple. Fig. 2**

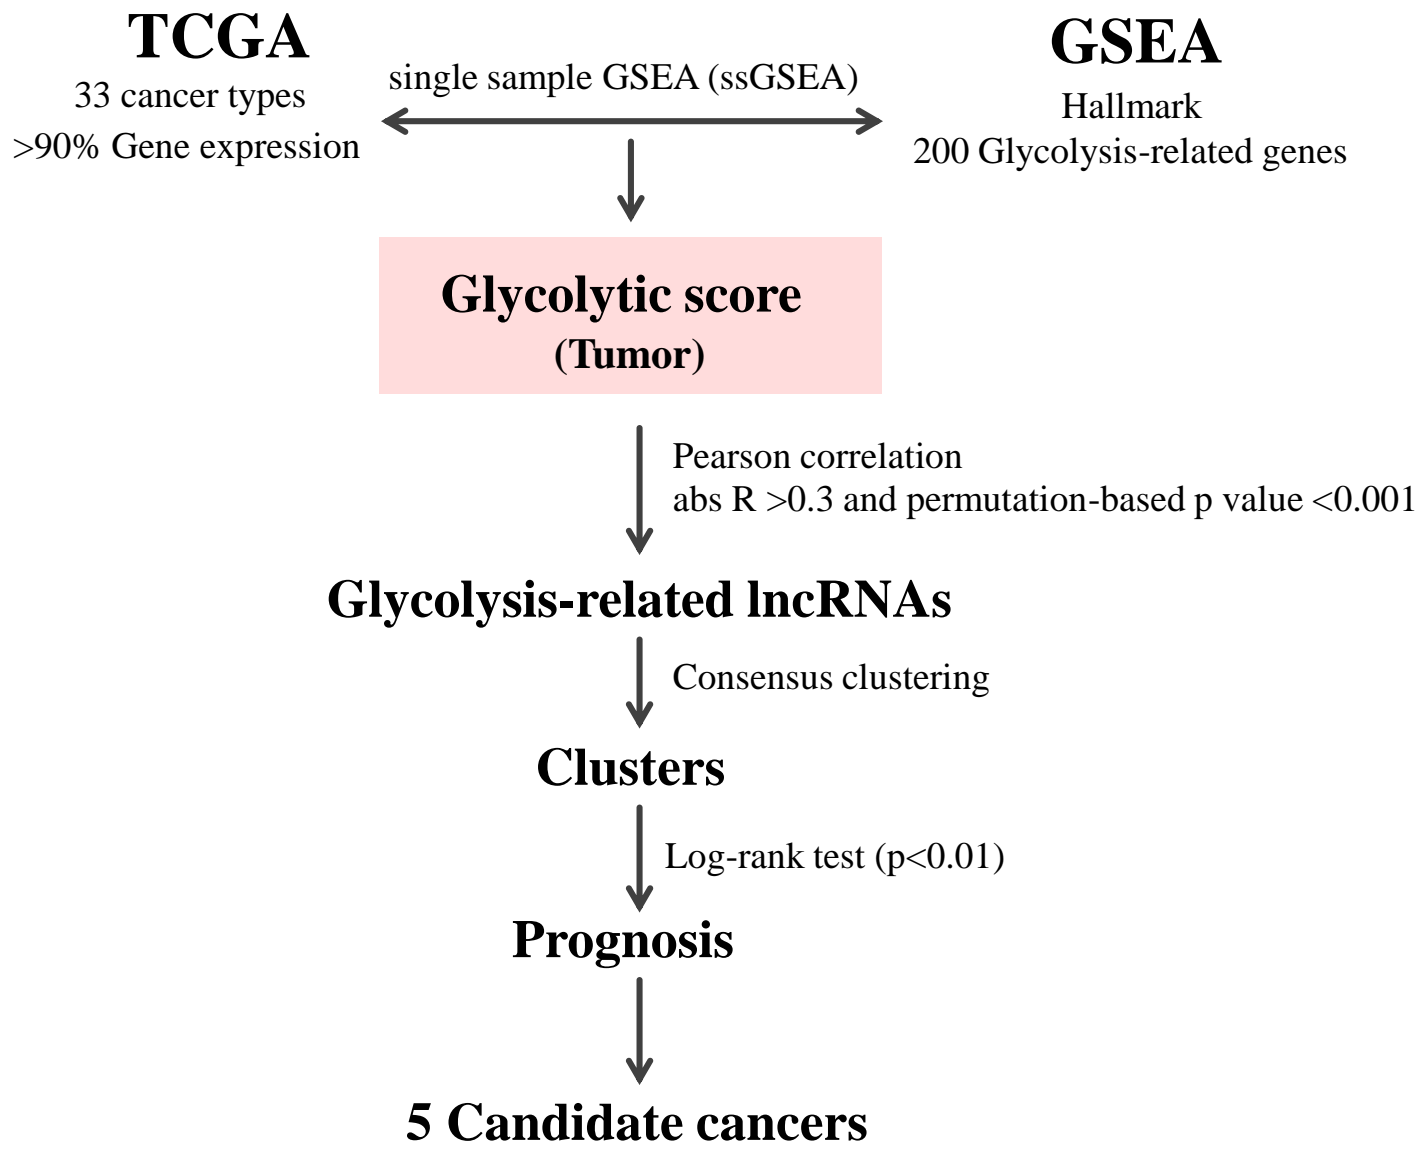

**Supplemental Fig. 2. Flowchart for filtering cancer types and selecting glycolysis-associated long non-coding (lnc)RNAs in the present study.**
