# Supplementary material for: Glycolysis-associated lncRNAs identify a subgroup of cancer patients with poor prognoses and a high-infiltration immune microenvironment
Source: Springer Nature journal article supplement (doi:10.1186/s12916-021-01925-6), 2021-02-25

**Supple. Fig. 3**

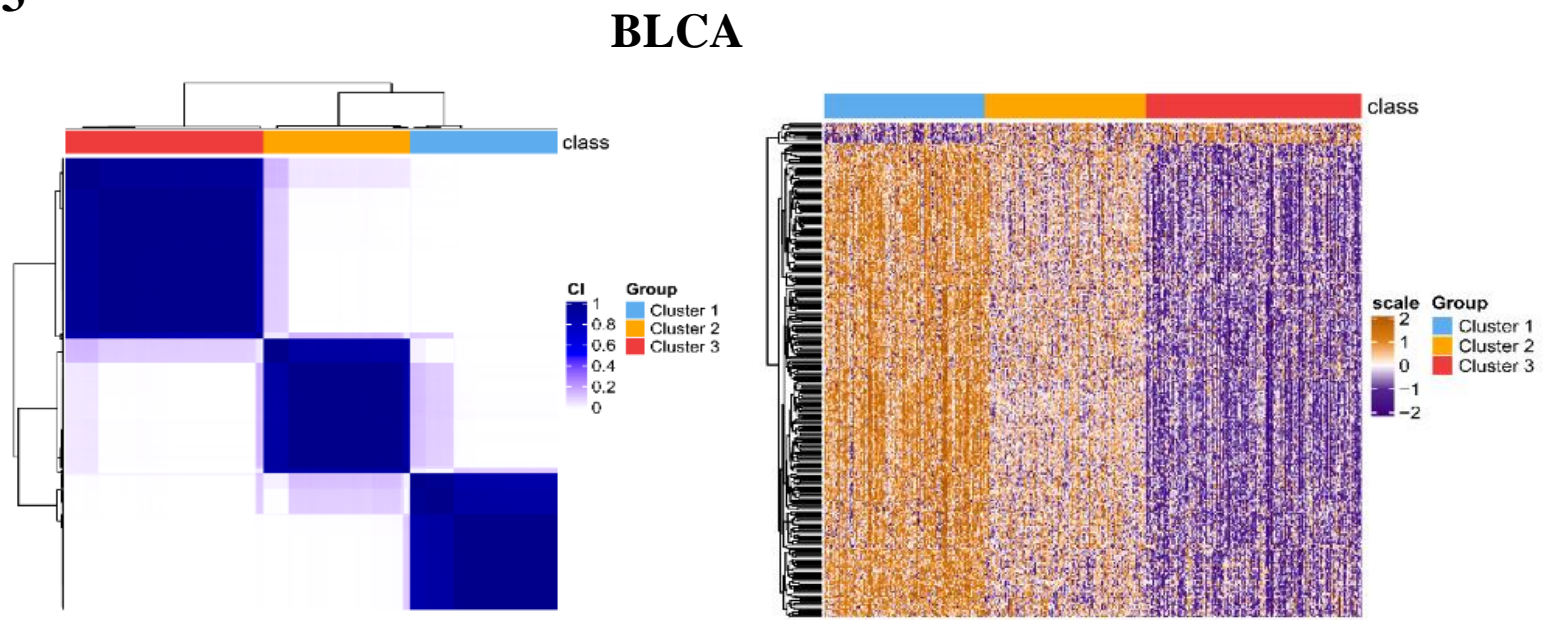

**Supplemental Fig. 3. Stratification of patients into different clusters by a consensus clustering analysis.** The right panel shows unsupervised clustering results of glycolysis-associated long non-coding (lnc)RNAs in bladder carcinoma (BLCA), low-grade gliomas (LGGs), mesotheliomas (MESOs), pancreatic ductal adenocarcinomas (PAADs), and uveal melanomas (UVMs).

Continued  
Supple. Fig. 2

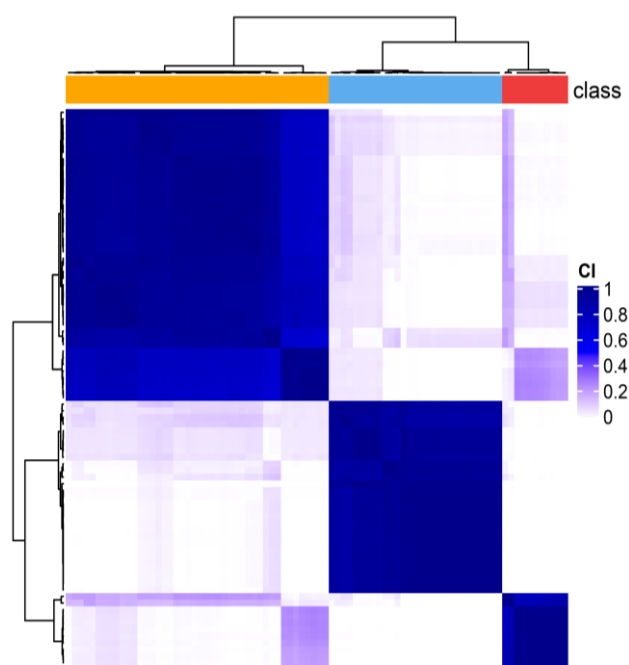

**LGG**

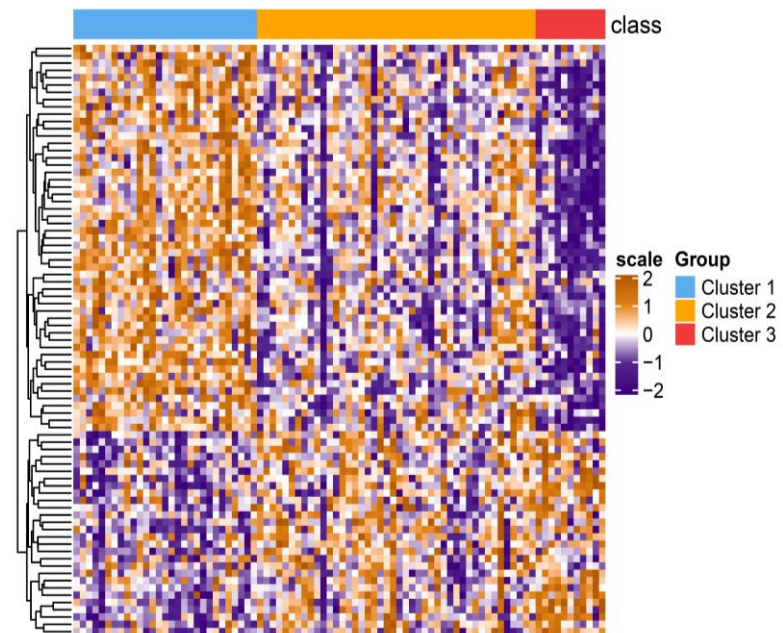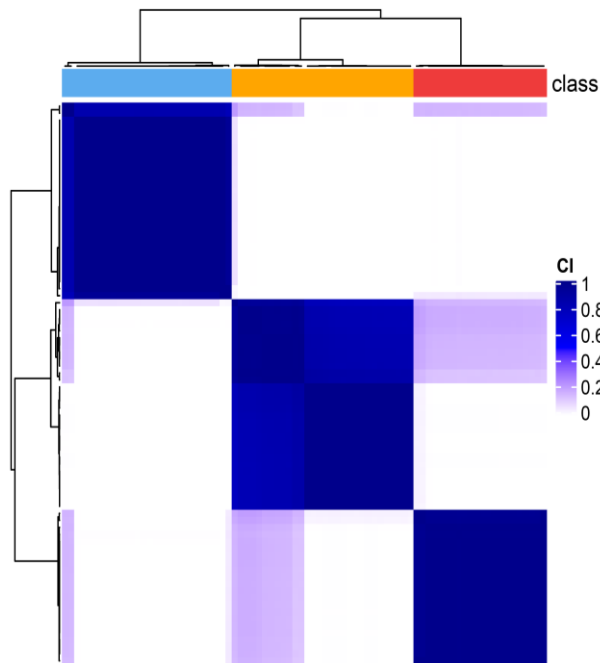

**MESO**

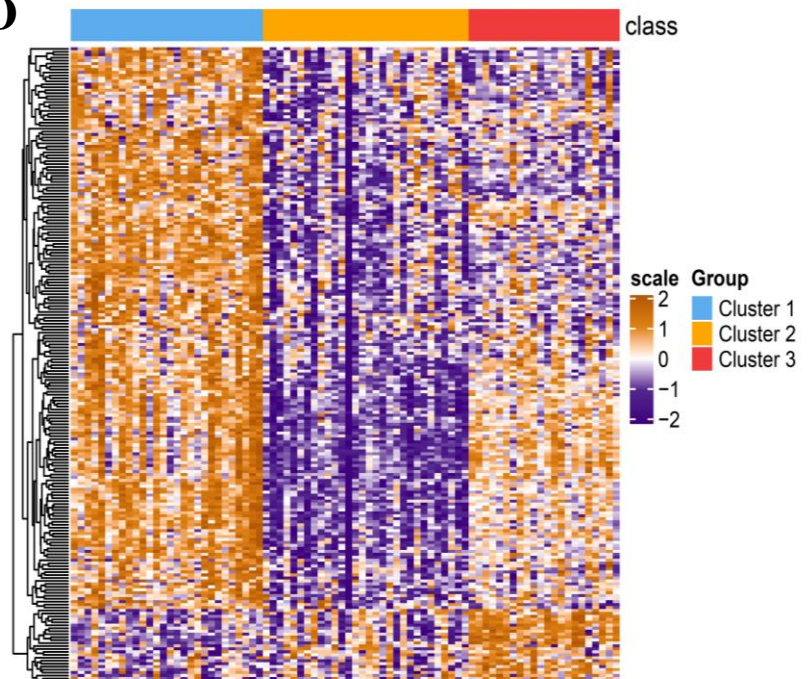

Continued  
Supple. Fig. 2

# UVM

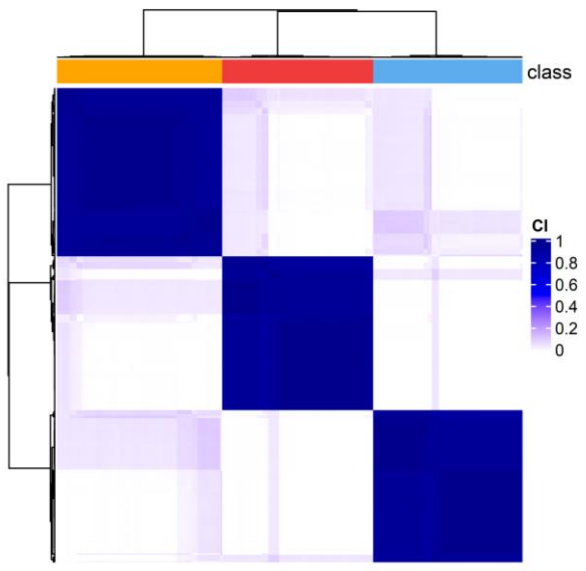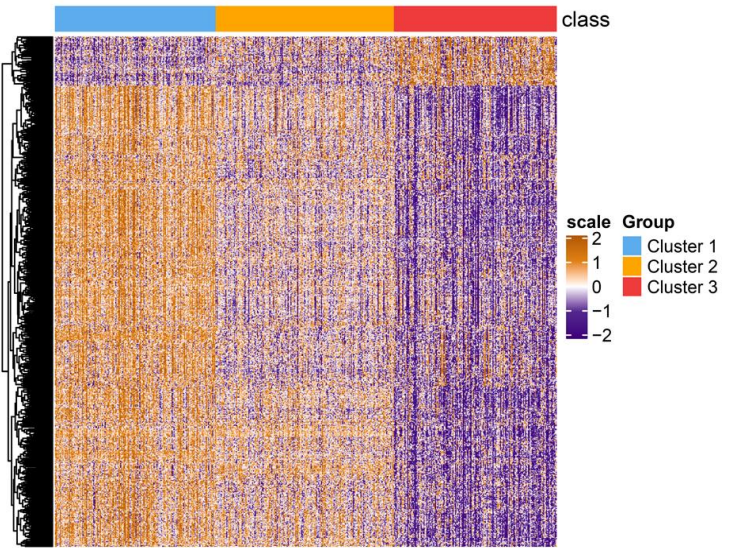

# PAAD

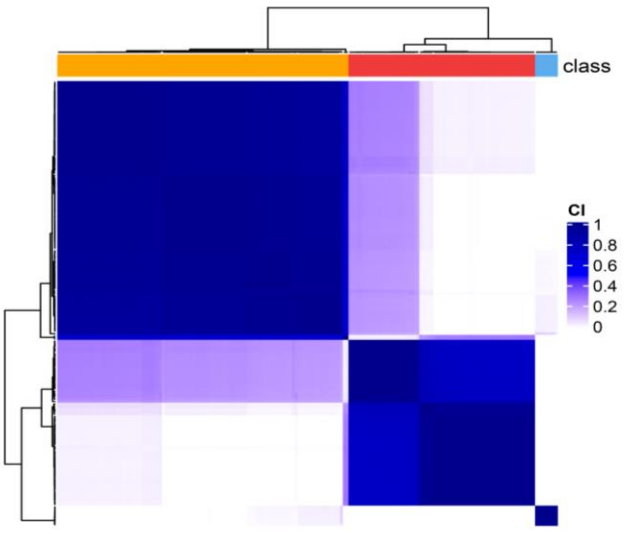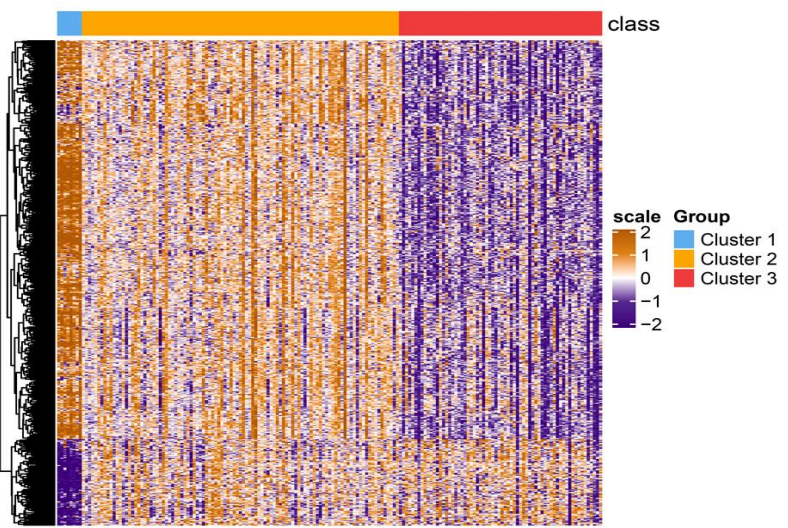

Supplement: MOESM7 [file 18903798]
