# Supplementary material for: Glycolysis-associated lncRNAs identify a subgroup of cancer patients with poor prognoses and a high-infiltration immune microenvironment
Source: Springer Nature journal article supplement (doi:10.1186/s12916-021-01925-6), 2021-02-25
Supplement: MOESM9 [file 18903798]

**Supple. Fig. 4**

**Low grade glioma (LGG) and bladder cancer (BLCA)**

↓ C3 vs C1 FC>1.5 or <0.7 and FDR<0.01  
C2 vs C1 FC>1.5 or <0.7 and FDR<0.01

**LncRNA-based cluster associated gene**

↓ Lasso panelized logistic regression model

**Genomic classifier**

Survival analysis  
Glycolysis activity

**LGG**

**GSE16011**  
**GSE107850**

**BLCA**

**GSE48075**  
**GSE13507**

**Supplemental Fig. 3. Flowchart for establishing genomic classifiers using a conducting lasso penalized lasso regression.**
