# Supplementary material for: Glycolysis-associated lncRNAs identify a subgroup of cancer patients with poor prognoses and a high-infiltration immune microenvironment
Source: Springer Nature journal article supplement (doi:10.1186/s12916-021-01925-6), 2021-02-25
Supplement: MOESM12 [file 18903798]

**Supple. Fig. 7**

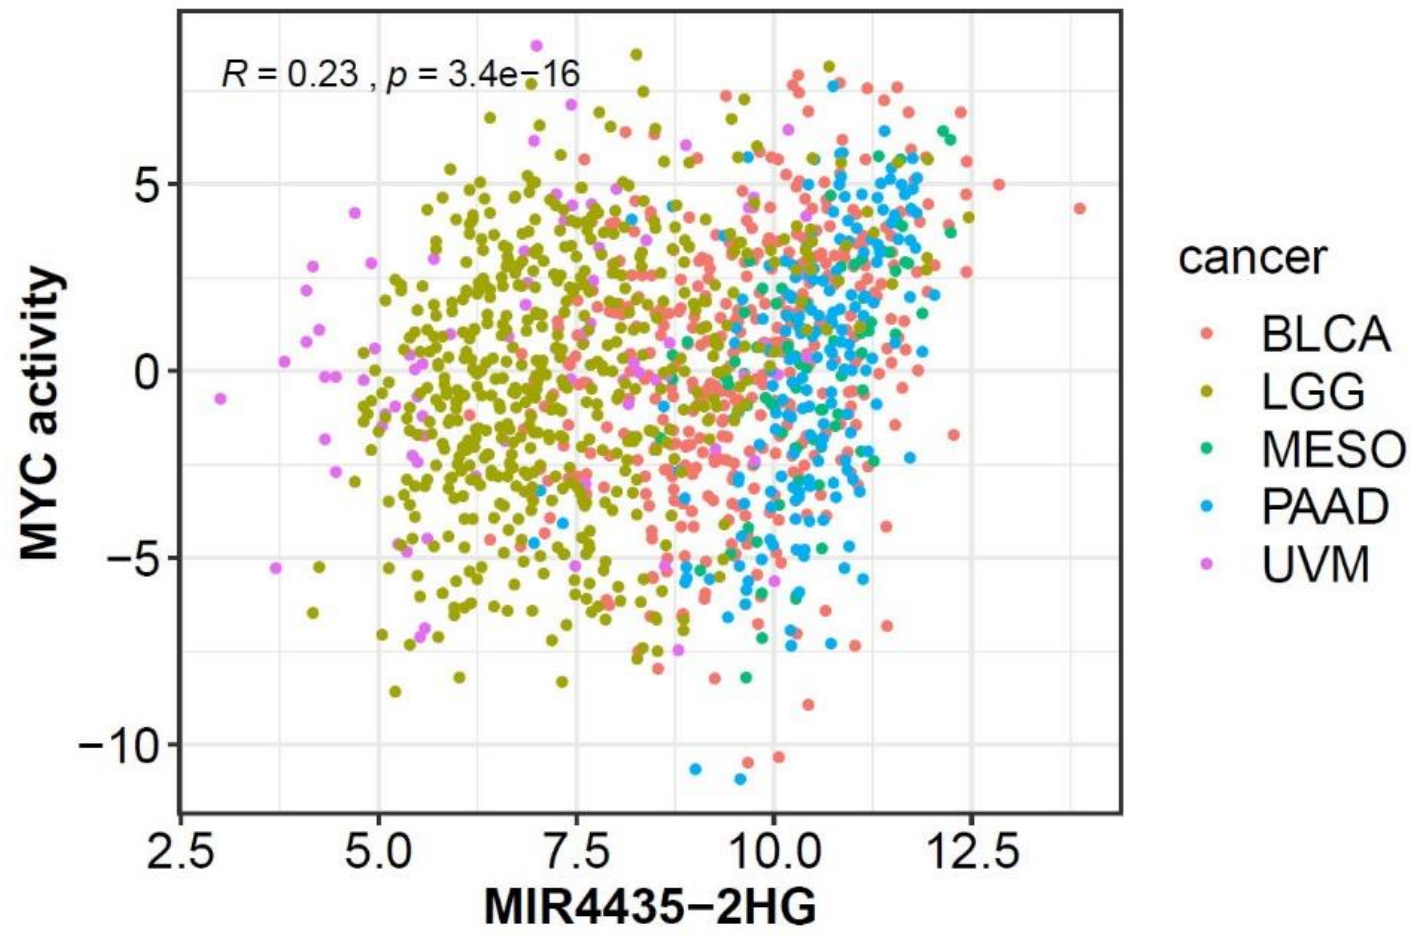

**Supplemental Fig. 7. Dot plots of lncRNA-MYC activity pairs that exhibit positive correlations across four cancer types.**
