# Supplementary material for: Glycolysis-associated lncRNAs identify a subgroup of cancer patients with poor prognoses and a high-infiltration immune microenvironment
Source: BMC Med. 2021 Feb 25;19:59. doi: 10.1186/s12916-021-01925-6 (PMC7905662; doi:10.1186/s12916-021-01925-6)
Supplement: Supplementary file 1 — Additional file 1: Table S1. Glycolysis candidate genes in each cancer types. [file 12916_2021_1925_MOESM1_ESM.xlsx]

## Sheet: glycolysis_gene_candidates_drop
Supplementary Table S1. Glycolysis candidates that their gene counts was not >10 in more than 90% of cancer patients
Cancer types	Glycolysis candidates that their gene counts was not >10 in more than 90% of cancer patients
BLCA	ALDOB, B3GAT1, CHST4, CLDN3, CLDN9, DPYSL4, FBP2, GAL3ST1, GAPDHS, GYS2, LCT, LDHC, LHX9, MIOX, NDST3, PFKFB1, PGAM2, TFF3, TKTL1
LUSC	ALDOB, B3GAT1, CHST4, CLDN9, FBP2, GAL3ST1, GAPDHS, GYS2, LCT, LDHC, LHX9, MIOX, NDST3, PFKFB1, PGAM2, TKTL1
ESCA	ALDOB, B3GAT1, CHST4, CLDN9, FBP2, GAL3ST1, GAPDHS, GPR87, GYS2, LCT, LDHC, LHX9, MIOX, NDST3, PGAM2, TKTL1
MESO	ALDOB, ARTN, B3GNT3, CLDN3, CLDN9, FBP2, GAPDHS, GPR87, GYS2, HS6ST2, LCT, LDHC, LHX9, MIOX, NDST3, PFKFB1, PGAM2, TFF3, TKTL1
LUAD	ALDOB, CHST4, FBP2, GAPDHS, GPR87, GYS2, LCT, LDHC, LHX9, MIOX, NDST3, PFKFB1, PGAM2, TKTL1
STAD	CHST4, CLDN9, FBP2, GAPDHS, GPR87, GYS2, HS6ST2, LCT, LDHC, LHX9, MIOX, NDST3, PFKFB1, PGAM2, TKTL1
TGCT	ALDOB, B3GNT3, CHST4, CLDN3, CLDN9, FBP2, GAPDHS, GPR87, GYS2, HS6ST2, LCT, LDHC, LHX9, MIOX, NDST3, PGAM2, TFF3
UVM	ADORA2B, ALDOB, ARTN, B3GNT3, BIK, CHST4, CLDN3, CLDN9, DEPDC1, ELF3, FBP2, GAL3ST1, GPR87, GYS2, HMMR, HOMER1, HS6ST2, LCT, LDHC, LHX9, MIOX, NDST3, PFKFB1, PGAM2, PKP2, TGFA, TKTL1
PAAD	FBP2, GAPDHS, GPR87, GYS2, HS6ST2, LCT, LDHC, LHX9, MIOX, NDST3, PFKFB1, PGAM2, TKTL1
GBM	ALDOB, B3GNT3, BIK, CHST4, CLDN3, CLDN9, FBP2, GAPDHS, GPR87, GYS2, LCT, LDHC, MIOX, NDST3, PFKFB1, PGAM2, PKP2, TFF3
COAD	B3GAT1, CHST4, CLDN9, DPYSL4, FBP2, GAPDHS, GPR87, GYS2, LCT, LDHC, LHX9, MIOX, NDST3, PFKFB1, PGAM2, PPFIA4, TKTL1
OV	ALDOB, B3GAT1, FBP2, GAPDHS, GPR87, GYS2, LCT, LDHC, LHX9, MIOX, NDST3, PFKFB1, PGAM2, TFF3, TKTL1
THYM	ALDOB, ARTN, B3GNT3, CHST4, CHST6, CLDN3, CLDN9, FBP2, GAL3ST1, GAPDHS, GPR87, GYS2, LCT, LDHC, LHX9, MIOX, PGAM2, TKTL1
BRCA	ALDOB, B3GAT1, B3GNT3, CHST4, CLDN9, FBP2, GAL3ST1, GAPDHS, GPR87, GYS2, LCT, LDHC, LHX9, MIOX, NDST3, PGAM2, TKTL1
UCEC	ALDOB, B3GAT1, CHST4, CLDN9, FBP2, GAPDHS, GPR87, GYS2, LCT, LDHC, LHX9, MIOX, NDST3, PFKFB1, PGAM2, TKTL1
UCS	ALDOB, B3GNT3, CHST4, FBP2, GAPDHS, GPR87, GYS2, LCT, LDHC, LHX9, MIOX, NDST3, PFKFB1, PGAM2, TKTL1
CHOL	ARTN, BIK, CENPA, CHST6, DEPDC1, DPYSL4, EFNA3, FBP2, GAPDHS, GPR87, GYS2, HS6ST2, LCT, LDHC, LHX9, MIOX, NDST3, PFKFB1, PGAM2, PPFIA4, TKTL1
KIRC	ARTN, BIK, CHST4, CHST6, CLDN9, DPYSL4, FBP2, GAPDHS, GPR87, GYS2, HS6ST2, LCT, LDHC, LHX9, NDST3, PFKFB1, PGAM2, TKTL1
ACC	ARTN, B3GAT1, B3GNT3, CHST4, CHST6, CLDN3, CLDN9, DSC2, ELF3, FBP2, GAL3ST1, GAPDHS, GPR87, GYS2, HS6ST2, LCT, LDHC, LHX9, MIOX, NDST3, PFKFB1, PGAM2, PKP2, PPFIA4, SOX9, TFF3, TGFA, TKTL1
LGG	B3GNT3, BIK, CENPA, CHST4, CLDN3, DEPDC1, ELF3, FBP2, GAPDHS, GPR87, GYS2, LCT, LDHC, LHX9, MIOX, NDST3, PGAM2, STC1, TFF3
KIRP	ADORA2B, ARTN, CENPA, CHST4, CHST6, CLDN9, DEPDC1, DPYSL4, FBP2, GAPDHS, GPR87, GYS2, HS6ST2, LCT, LDHC, LHX9, NDST3, PFKFB1, PGAM2, TFF3, TKTL1
KICH	ADORA2B, ALDOB, B3GAT1, B3GNT3, CENPA, CHST4, CHST6, CLDN9, DEPDC1, DPYSL4, FBP2, GAPDHS, GPR87, GYS2, HS6ST2, LCT, LDHC, LHX9, MIOX, NDST3, PFKFB1, PGAM2, PPFIA4, TKTL1
THCA	ADORA2B, ALDOB, B3GNT3, CENPA, CHST4, FBP2, GAL3ST1, GAPDHS, GPR87, GYS2, HS6ST2, LCT, LDHC, LHX9, NDST3, PFKFB1, PGAM2, TKTL1
LIHC	ADORA2B, ARTN, B3GAT1, B3GNT3, BIK, CENPA, CHST4, CHST6, DPYSL4, FBP2, GAPDHS, GPR87, HS6ST2, LCT, LDHC, LHX9, MIOX, NDST3, PGAM2, PPFIA4, TKTL1, TPBG
HNSC	ALDOB, B3GAT1, CHST4, CLDN3, CLDN9, FBP2, GAL3ST1, GAPDHS, GYS2, LCT, LDHC, LHX9, MIOX, NDST3, PFKFB1, PGAM2, TFF3, TKTL1
CESC	ALDOB, B3GAT1, CHST4, CLDN9, DPYSL4, FBP2, GAL3ST1, GAPDHS, GYS2, HS6ST2, LCT, LDHC, LHX9, MIOX, NDST3, PFKFB1, PGAM2, TFF3, TKTL1
READ	B3GAT1, CHST4, CLDN9, DPYSL4, FBP2, GAPDHS, GPR87, GYS2, LCT, LDHC, LHX9, MIOX, NDST3, PFKFB1, PGAM2, PPFIA4, TKTL1
PCPG	ADORA2B, ARTN, B3GNT3, BIK, CENPA, CHST4, CHST6, CLDN3, DEPDC1, ELF3, FBP2, GAL3ST1, GAPDHS, GPR87, GYS2, LCT, LDHC, LHX9, MIOX, NDST3, PFKFB1, PGAM2, TKTL1
SARC	ALDOB, ARTN, B3GAT1, B3GNT3, BIK, CHST4, CLDN3, CLDN9, DPYSL4, ELF3, FBP2, GAL3ST1, GAPDHS, GPR87, GYS2, HS6ST2, LCT, LDHC, LHX9, MIOX, NDST3, PFKFB1, PGAM2, PKP2, TFF3, TKTL1
DLBC	ALDOB, ARTN, B3GNT3, CHST4, CHST6, CLDN3, CLDN9, DPYSL4, ELF3, FBP2, GAL3ST1, GAPDHS, GPC3, GPR87, GYS2, HS6ST2, LCT, LDHC, LHX9, MIOX, NDST3, PFKFB1, PGAM2, PKP2, SOX9, TFF3, TKTL1
PRAD	ALDOB, CHST4, CHST6, CLDN9, FBP2, GAPDHS, GPR87, GYS2, LCT, LDHC, LHX9, MIOX, NDST3, PGAM2, TKTL1
LAML	ALDOB, ANG, B3GAT1, B3GNT3, CACNA1H, CHST1, CHST4, CHST6, CLDN3, CLDN9, DCN, DPYSL4, DSC2, EGFR, EGLN3, FBP2, GAL3ST1, GAPDHS, GPC3, GPC4, GPR87, GYS2, HOMER1, HS6ST2, IGFBP3, LCT, LDHC, LHX9, ME1, MET, MIOX, NDST3, PFKFB1, PGAM2, PKP2, PLOD2, SDC2, SOX9, STC1, STC2, TFF3, TKTL1, TPBG
SKCM	ALDOB, ARTN, B3GAT1, B3GNT3, BIK, CHST4, CLDN3, CLDN9, ELF3, FBP2, GAL3ST1, GAPDHS, GPR87, GYS2, HS6ST2, LCT, LDHC, LHX9, MIOX, NDST3, PFKFB1, PGAM2, PKP2, TFF3, TKTL1
