# Supplementary material for: Glycolysis-associated lncRNAs identify a subgroup of cancer patients with poor prognoses and a high-infiltration immune microenvironment
Source: BMC Med. 2021 Feb 25;19:59. doi: 10.1186/s12916-021-01925-6 (PMC7905662; doi:10.1186/s12916-021-01925-6)
Supplement: Supplementary file 4 — Additional file 4: Table S4. Gene candidates in TCGA BLCA data. Table S5. Ggene candidates in TCGA LGG data. [file 12916_2021_1925_MOESM4_ESM.xlsx]

## Sheet: BLCA 
Supplementary Table S4. Table of gene candidates derived from lasso penalized mutinominal logistic regression TCGA BLCA data .
Gene	Cluster 1	Cluster 2	Cluster 3
PLAUR	-0.133859	0	0
MT2A	-0.189083	0.0556101	0
IFITM3	-0.198624	0.0334203	0
IL15RA	-0.0501101	0	0
EXT1	0	0	0.00294657
S100A16	-0.0482662	0	0.0770302
DUSP7	-0.0122341	0	0
SNAI2	0	0.0482756	0
ME1	0	0	0.105777
PHLDA1	-0.0952199	0	0.150378
S100A14	0	0	0.0222754
NBPF11	0.11197	0	-0.464981
NBPF12	0	0	-0.771893
NKTR	0	0	-0.0105769
TTLL3	0.449009	0	0
CCNL2	0.163797	0	0
CSAD	0.115823	0	-0.0211637
MAPK8IP3	0	0	-0.155957
PPP1R3E	0	0	-0.442063
ZNF44	0.135778	0	0
ZNF345	0.199097	0	0
ZNF141	0	0.00366112	-0.231096
PPFIBP2	0.125492	0	0
AGER	0	0.00433249	-0.121233
ZNF711	0	0	-0.00625789
GATA3	0.0141813	0	0

## Sheet: LGG
Supplementary Table S5. Table of gene candidates derived from lasso penalized mutinominal logistic regression in TCGA LGG data.
Gene	Cluster 1	Cluster 2	Cluster 3
CLIC1	0	0	0.652328
GNG5	-0.547305	0	0
PDPN	0	-0.141858	0
ANXA2	0	0	0.136772
FTL	-0.304483	0	0.159929
PLEKHA4	0	0	0.0543904
S100A6	0	0	0.298303
C1R	0	-0.40481	0
FLNC	0	-0.0433552	0
B9D2	-0.362608	0	0.186798
MAN1C1	0	0	0.0304171
FHL3	-0.520936	0	0
HSPB6	0	-0.00323147	0
CAPG	0	-0.0975851	0
BST2	0	0	0.0643875
CASP1	0	0.201823	0
PRDX6	-0.146714	0	0.0887798
CYBA	0	0.0980807	0
VAMP8	0	0.321831	0
S100A10	-0.0564137	0.0525162	0
MMP14	0	0.017731	0
PDIA5	-0.221197	0	0
ELF4	0	0	-0.0616693
C2	-0.0478422	0	0
C1QA	0	0.163744	0
FLNA	0	0	-0.269441
HEBP1	-0.278547	0	0.0346481
EMP1	0	0.0236361	0
CIITA	0.0670162	0	0
TNC	0	0	-0.208055
CEBPD	-0.0160621	0	0
CLEC7A	0	0	-0.0452631
MUC1	0	0	-0.272303
JAK3	0	-0.144995	0
CD163	0	-0.00780755	0
GRIK2	0.126389	0	-0.243114
SEZ6L	0.255201	0	0
TNR	0	0	-0.0612885
ABCC8	0.223824	0	0
MYT1	0	0	-0.390497
RGR	0	0	-0.0723893
DCX	0	0	-0.0710506
CLGN	0	0	-0.144004
MYO16	0	0.0784462	0
HAPLN1	0	-0.0263652	0.0912281
