# Supplementary material for: Glycolysis-associated lncRNAs identify a subgroup of cancer patients with poor prognoses and a high-infiltration immune microenvironment
Source: BMC Med. 2021 Feb 25;19:59. doi: 10.1186/s12916-021-01925-6 (PMC7905662; doi:10.1186/s12916-021-01925-6)
Supplement: Supplementary file 5 — Additional file 5. Table S6. Number of tumor tissues from TCGA pan cancer data. [file 12916_2021_1925_MOESM5_ESM.xlsx]

## Sheet: 工作表1
Supplementary Table S6.Number of tumor tissues from TCGA pan cancer data
Study Abbreviation	Study Name	Sample size
LAML	Acute Myeloid Leukemia	132
ACC	Adrenocortical carcinoma	79
BLCA	Bladder Urothelial Carcinoma	406
LGG	Brain Lower Grade Glioma	524
BRCA	Breast invasive carcinoma	1082
CESC	Cervical squamous cell carcinoma and endocervical adenocarcinoma	293
CHOL	Cholangiocarcinoma	36
COAD	Colon adenocarcinoma	448
ESCA	Esophageal carcinoma	161
GBM	Glioblastoma multiforme	167
HNSC	Head and Neck squamous cell carcinoma	501
KICH	Kidney Chromophobe	64
KIRC	Kidney renal clear cell carcinoma	531
KIRP	Kidney renal papillary cell carcinoma	286
LIHC	Liver hepatocellular carcinoma	368
LUAD	Lung adenocarcinoma	513
LUSC	Lung squamous cell carcinoma	493
DLBC	Lymphoid Neoplasm Diffuse Large B-cell Lymphoma	47
MESO	Mesothelioma	84
OV	Ovarian serous cystadenocarcinoma	378
PAAD	Pancreatic adenocarcinoma	177
PCPG	Pheochromocytoma and Paraganglioma	183
PRAD	Prostate adenocarcinoma	499
READ	Rectum adenocarcinoma	158
SARC	Sarcoma	260
SKCM	Skin Cutaneous Melanoma	457
STAD	Stomach adenocarcinoma	350
TGCT	Testicular Germ Cell Tumors	139
THYM	Thymoma	118
THCA	Thyroid carcinoma	509
UCS	Uterine Carcinosarcoma	54
UCEC	Uterine Corpus Endometrial Carcinoma	544
UVM	Uveal Melano	80
