# Supplementary material for: Glycolysis-associated lncRNAs identify a subgroup of cancer patients with poor prognoses and a high-infiltration immune microenvironment
Source: BMC Med. 2021 Feb 25;19:59. doi: 10.1186/s12916-021-01925-6 (PMC7905662; doi:10.1186/s12916-021-01925-6)
Supplement: Supplementary file 8 — Additional file 8: Table S7. Glycolytic score associated lncRNA in UVM. [file 12916_2021_1925_MOESM8_ESM.xlsx]

## Sheet: Overview
Supplementary Table S7-1. Summary of the number of lncRNA significantly asscoaited with glycolytic score in different cancer types
Cacner type	Positive association	Negative asscoiation
BLCA	11	248
LGG	68	638
MESO	28	53
PAAD	97	449
UVM	25	190

## Sheet: BLCA
Supplementary Ttable 7-2. Table of Glycolytic score associated lncRNA in BLCA
Ensemble	Symbol	R	FDR
ENSG00000172965	MIR4435-2HG	0.50604	2.55801e-25
ENSG00000222041	CYTOR	0.479579	1.26322e-22
ENSG00000224397	SMIM25	0.394419	2.89934e-15
ENSG00000262454	MIR193BHG	0.385561	1.29569e-14
ENSG00000261189	AL031058.1	0.354907	1.5987e-12
ENSG00000241990	PRR34-AS1	0.3471	5.15541e-12
ENSG00000265415	AC099850.3	0.319363	2.53488e-10
ENSG00000163364	LINC01116	0.314297	4.91068e-10
ENSG00000280206	AC026401.3	0.313578	5.42111e-10
ENSG00000253669	GASAL1	0.310983	7.51673e-10
ENSG00000256940	PPP1R14B-AS1	0.303578	1.97019e-09
ENSG00000277476	AC005332.5	-0.3005	2.91491e-09
ENSG00000181097	AC105219.1	-0.301265	2.63514e-09
ENSG00000268471	MIR4453HG	-0.301343	2.61748e-09
ENSG00000256092	SBNO1-AS1	-0.302052	2.38397e-09
ENSG00000247950	SEC24B-AS1	-0.302203	2.34419e-09
ENSG00000253106	AC090198.1	-0.302206	2.34419e-09
ENSG00000176593	AC008969.1	-0.302455	2.28224e-09
ENSG00000224975	INE1	-0.303498	1.98423e-09
ENSG00000270344	POC1B-AS1	-0.304026	1.85917e-09
ENSG00000273373	AL355488.1	-0.304044	1.85917e-09
ENSG00000257671	KRT7-AS	-0.304799	1.68375e-09
ENSG00000215067	ALOX12-AS1	-0.304861	1.67598e-09
ENSG00000271858	CYB561D2	-0.305332	1.57627e-09
ENSG00000278768	BACE1-AS	-0.305365	1.57537e-09
ENSG00000188185	LINC00265	-0.305528	1.54636e-09
ENSG00000267040	AC027097.1	-0.306034	1.44708e-09
ENSG00000215424	MCM3AP-AS1	-0.306469	1.36725e-09
ENSG00000261505	AL031714.1	-0.307449	1.19695e-09
ENSG00000244879	GABPB1-AS1	-0.307577	1.18059e-09
ENSG00000256690	AP001160.1	-0.307759	1.15558e-09
ENSG00000279159	AC003681.1	-0.308135	1.10072e-09
ENSG00000273192	AL671710.1	-0.308505	1.04933e-09
ENSG00000226696	LENG8-AS1	-0.310012	8.51657e-10
ENSG00000259456	ADNP-AS1	-0.31039	8.10658e-10
ENSG00000257354	AC048341.1	-0.310732	7.75637e-10
ENSG00000267342	AC087289.2	-0.311342	7.17288e-10
ENSG00000261474	AC026471.4	-0.311345	7.17288e-10
ENSG00000272455	AL391244.2	-0.311564	7.00999e-10
ENSG00000259250	AC018904.1	-0.311995	6.62128e-10
ENSG00000260400	AL513534.2	-0.312319	6.34943e-10
ENSG00000268575	AL031282.2	-0.312385	6.31793e-10
ENSG00000187013	C17orf82	-0.31244	6.29544e-10
ENSG00000170919	TPT1-AS1	-0.313025	5.81602e-10
ENSG00000270761	AL355353.1	-0.313419	5.52087e-10
ENSG00000224078	SNHG14	-0.314795	4.59097e-10
ENSG00000230163	AL122010.1	-0.315286	4.29673e-10
ENSG00000273723	AL139089.1	-0.315465	4.20597e-10
ENSG00000205890	AC108134.1	-0.31549	4.20597e-10
ENSG00000276007	AC079414.3	-0.315677	4.11651e-10
ENSG00000214783	POLR2J4	-0.316646	3.59367e-10
ENSG00000228956	SATB1-AS1	-0.316787	3.53749e-10
ENSG00000273576	AC009283.1	-0.316871	3.51074e-10
ENSG00000229589	ACVR2B-AS1	-0.317757	3.10062e-10
ENSG00000247373	TMED2-DT	-0.317937	3.03428e-10
ENSG00000273151	AC073957.3	-0.317999	3.02119e-10
ENSG00000238197	PAXBP1-AS1	-0.318189	2.95252e-10
ENSG00000242086	MUC20-OT1	-0.318627	2.78284e-10
ENSG00000258441	LINC00641	-0.318696	2.76788e-10
ENSG00000228393	LINC01004	-0.319003	2.65921e-10
ENSG00000247092	SNHG10	-0.319734	2.41231e-10
ENSG00000274561	AC005332.3	-0.320616	2.12892e-10
ENSG00000233175	AC008105.1	-0.320684	2.11823e-10
ENSG00000272145	NFYC-AS1	-0.320938	2.05049e-10
ENSG00000259959	AC107068.1	-0.32128	1.95919e-10
ENSG00000228274	AL021707.2	-0.321574	1.88519e-10
ENSG00000272777	AC019131.2	-0.322293	1.70331e-10
ENSG00000269318	AC007292.2	-0.322579	1.6409e-10
ENSG00000279207	AC015813.6	-0.3226	1.6409e-10
ENSG00000225032	AL162586.1	-0.32283	1.59698e-10
ENSG00000258057	BCDIN3D-AS1	-0.323655	1.41976e-10
ENSG00000267980	AC007292.1	-0.32395	1.36562e-10
ENSG00000258727	AL135999.1	-0.324065	1.34937e-10
ENSG00000277449	CEBPB-AS1	-0.324745	1.22528e-10
ENSG00000233006	MIR3936HG	-0.324841	1.21416e-10
ENSG00000229152	ANKRD10-IT1	-0.325345	1.13175e-10
ENSG00000273449	AC093788.1	-0.325407	1.12732e-10
ENSG00000270605	AL353622.1	-0.325753	1.07598e-10
ENSG00000267244	AC012615.6	-0.325972	1.04668e-10
ENSG00000267002	AC060780.1	-0.326313	9.99702e-11
ENSG00000259891	AC107375.1	-0.327051	8.99315e-11
ENSG00000273472	AC096733.2	-0.327135	8.92832e-11
ENSG00000260711	AL121839.2	-0.327418	8.60093e-11
ENSG00000272654	AL358472.2	-0.327592	8.42423e-11
ENSG00000280383	Z95331.1	-0.328381	7.51698e-11
ENSG00000259248	USP3-AS1	-0.328454	7.4757e-11
ENSG00000231160	KLF3-AS1	-0.329791	6.13434e-11
ENSG00000270195	AC016773.1	-0.330076	5.90636e-11
ENSG00000260942	CAPN10-DT	-0.330462	5.60019e-11
ENSG00000269982	AC018809.2	-0.33094	5.23495e-11
ENSG00000273437	AC108673.3	-0.331123	5.11904e-11
ENSG00000272752	STAG3L5P-PVRIG2P-PILRB	-0.331678	4.72906e-11
ENSG00000273247	AC097376.3	-0.332347	4.29154e-11
ENSG00000260686	AC008669.1	-0.332362	4.29154e-11
ENSG00000236255	AC009404.1	-0.332876	4.00208e-11
ENSG00000196295	GARS-DT	-0.332924	3.99596e-11
ENSG00000182873	PRKCZ-AS1	-0.333072	3.92888e-11
ENSG00000258301	VASH1-AS1	-0.333165	3.89619e-11
ENSG00000260912	AL158206.1	-0.333714	3.60061e-11
ENSG00000228302	AL512770.1	-0.333794	3.57791e-11
ENSG00000261094	AC007066.2	-0.334026	3.47257e-11
ENSG00000272010	AC100814.1	-0.334566	3.21365e-11
ENSG00000233527	ZNF529-AS1	-0.334594	3.21365e-11
ENSG00000235703	LINC00894	-0.335281	2.91124e-11
ENSG00000260236	AC099778.1	-0.337562	2.05184e-11
ENSG00000259953	AL138756.1	-0.337601	2.05184e-11
ENSG00000275437	AL121832.3	-0.338466	1.80276e-11
ENSG00000279407	AC007191.1	-0.338836	1.71149e-11
ENSG00000260005	AC027601.2	-0.339362	1.58524e-11
ENSG00000215458	AATBC	-0.339621	1.53166e-11
ENSG00000280046	AC104581.4	-0.339747	1.51103e-11
ENSG00000215769	ARHGAP27P1-BPTFP1-KPNA2P3	-0.340057	1.44823e-11
ENSG00000260317	AC009812.4	-0.340491	1.36086e-11
ENSG00000279716	AC006128.1	-0.340959	1.27188e-11
ENSG00000272316	AL021368.2	-0.341354	1.20235e-11
ENSG00000242861	AL591895.1	-0.341914	1.10727e-11
ENSG00000268970	AC022150.2	-0.342459	1.02197e-11
ENSG00000223891	OSER1-DT	-0.342636	1.00029e-11
ENSG00000250903	GMDS-DT	-0.34318	9.2312e-12
ENSG00000272734	ADIRF-AS1	-0.343299	9.11947e-12
ENSG00000227896	AL731569.1	-0.343858	8.39564e-12
ENSG00000279406	AL359183.1	-0.344039	8.21254e-12
ENSG00000271918	AC034236.2	-0.344244	8.00253e-12
ENSG00000240731	AL139287.1	-0.346014	6.0591e-12
ENSG00000261663	AC009065.8	-0.346817	5.35856e-12
ENSG00000270127	AC027020.2	-0.347358	4.97971e-12
ENSG00000269609	RPARP-AS1	-0.347739	4.71472e-12
ENSG00000251432	LINC02615	-0.348655	4.09068e-12
ENSG00000184441	AP001062.1	-0.349166	3.79079e-12
ENSG00000247828	TMEM161B-AS1	-0.349935	3.3673e-12
ENSG00000272054	AC007390.2	-0.350202	3.24757e-12
ENSG00000274712	AC005332.4	-0.350286	3.22699e-12
ENSG00000257815	AC025159.1	-0.350407	3.18736e-12
ENSG00000272807	AC007038.2	-0.35065	3.08636e-12
ENSG00000278784	AL136295.7	-0.351851	2.55196e-12
ENSG00000273271	AP000254.2	-0.353651	1.90917e-12
ENSG00000274422	AC245060.5	-0.353681	1.90917e-12
ENSG00000273329	AC078846.1	-0.354074	1.80771e-12
ENSG00000224934	AL391684.1	-0.354125	1.8068e-12
ENSG00000279059	AC007485.2	-0.355401	1.48416e-12
ENSG00000280211	AC106886.4	-0.356608	1.22249e-12
ENSG00000235954	TTC28-AS1	-0.357208	1.11425e-12
ENSG00000266904	LINC00663	-0.358425	9.153e-13
ENSG00000179818	PCBP1-AS1	-0.35891	8.50321e-13
ENSG00000261324	AC010168.2	-0.358915	8.50321e-13
ENSG00000273058	AL359921.2	-0.358985	8.50321e-13
ENSG00000247137	AP000873.2	-0.359402	8.024e-13
ENSG00000223745	CCDC18-AS1	-0.35941	8.024e-13
ENSG00000281026	N4BP2L2-IT2	-0.359752	7.69322e-13
ENSG00000260276	AC022167.2	-0.359965	7.48546e-13
ENSG00000279759	AC118344.2	-0.361186	6.13515e-13
ENSG00000279738	AL022311.1	-0.362098	5.29669e-13
ENSG00000196951	SCOC-AS1	-0.362642	4.86975e-13
ENSG00000237037	NDUFA6-DT	-0.363782	4.04059e-13
ENSG00000228624	HDAC2-AS2	-0.364822	3.40838e-13
ENSG00000260778	AC009065.4	-0.365498	3.06073e-13
ENSG00000255182	AC084125.2	-0.365896	2.88347e-13
ENSG00000251867	AC009812.1	-0.366683	2.53893e-13
ENSG00000246526	LINC002481	-0.367783	2.11623e-13
ENSG00000227543	SPAG5-AS1	-0.368603	1.85166e-13
ENSG00000272368	AC074032.1	-0.368704	1.83677e-13
ENSG00000237491	LINC01409	-0.369712	1.55427e-13
ENSG00000269352	PTOV1-AS2	-0.369781	1.55072e-13
ENSG00000240288	GHRLOS	-0.370051	1.49376e-13
ENSG00000278133	AC135050.6	-0.370241	1.45911e-13
ENSG00000206573	THUMPD3-AS1	-0.370418	1.42883e-13
ENSG00000145075	CCDC39	-0.370648	1.38639e-13
ENSG00000273142	LINC02604	-0.371027	1.3103e-13
ENSG00000246090	AP002026.1	-0.371282	1.26563e-13
ENSG00000272141	AL390719.2	-0.373171	9.15401e-14
ENSG00000279452	AC006277.1	-0.373207	9.15401e-14
ENSG00000263072	ZNF213-AS1	-0.373428	8.93502e-14
ENSG00000264608	AC005726.3	-0.375097	6.70725e-14
ENSG00000280927	CTBP1-AS	-0.375173	6.68913e-14
ENSG00000272894	AC004982.2	-0.376755	5.09303e-14
ENSG00000262580	AC087741.1	-0.377167	4.7822e-14
ENSG00000276952	AL121772.3	-0.377583	4.48775e-14
ENSG00000263069	RNF213-AS1	-0.37808	4.14966e-14
ENSG00000272356	AL080317.2	-0.378611	3.81415e-14
ENSG00000267152	AC093227.1	-0.378917	3.65147e-14
ENSG00000228315	GUSBP11	-0.378978	3.65147e-14
ENSG00000269867	AC010326.3	-0.379002	3.65147e-14
ENSG00000273226	AL391834.2	-0.379037	3.65147e-14
ENSG00000271976	AC012467.2	-0.379386	3.5209e-14
ENSG00000279789	AC120114.3	-0.380467	2.92906e-14
ENSG00000270012	AC232271.1	-0.38096	2.71178e-14
ENSG00000279861	AC073548.1	-0.381387	2.5405e-14
ENSG00000269918	AF131215.6	-0.38182	2.37792e-14
ENSG00000259673	IQCH-AS1	-0.381876	2.37792e-14
ENSG00000266490	AC127024.5	-0.381964	2.37792e-14
ENSG00000273148	LINC00653	-0.382576	2.15506e-14
ENSG00000198590	C3orf35	-0.384146	1.63673e-14
ENSG00000228242	AC093495.1	-0.384586	1.53025e-14
ENSG00000262877	AC110285.2	-0.386131	1.18251e-14
ENSG00000264577	AC010761.1	-0.386262	1.171e-14
ENSG00000234771	SLC25A25-AS1	-0.38631	1.171e-14
ENSG00000276259	AC009118.3	-0.388876	7.40514e-15
ENSG00000271971	AC120053.1	-0.389709	6.42992e-15
ENSG00000256028	AC026362.1	-0.38993	6.26436e-15
ENSG00000280106	AC008555.7	-0.390538	5.67388e-15
ENSG00000259865	AL390728.6	-0.391259	5.03179e-15
ENSG00000225975	LINC01534	-0.391329	5.03179e-15
ENSG00000257621	PSMA3-AS1	-0.393784	3.21852e-15
ENSG00000260565	ERVK13-1	-0.395769	2.27725e-15
ENSG00000236901	MIR600HG	-0.39747	1.66989e-15
ENSG00000196696	AC009022.1	-0.39809	1.50769e-15
ENSG00000272849	AC084018.1	-0.39997	1.06572e-15
ENSG00000239665	AL157392.3	-0.400466	9.85354e-16
ENSG00000279529	AC008764.8	-0.400488	9.85354e-16
ENSG00000263345	AC006435.2	-0.400697	9.78089e-16
ENSG00000235016	SEMA3F-AS1	-0.401484	8.55012e-16
ENSG00000274383	AC103691.1	-0.402068	7.77864e-16
ENSG00000274925	ZKSCAN2-DT	-0.403391	6.1186e-16
ENSG00000227953	LINC01341	-0.403593	6.0027e-16
ENSG00000236144	TMEM147-AS1	-0.40502	4.62357e-16
ENSG00000279382	AC018665.1	-0.405025	4.62357e-16
ENSG00000280239	AC011498.7	-0.405208	4.62357e-16
ENSG00000273137	AL022328.2	-0.406788	3.47599e-16
ENSG00000247982	LINC00926	-0.409682	1.99214e-16
ENSG00000241769	LINC00893	-0.409916	1.94567e-16
ENSG00000203709	MIR29B2CHG	-0.409978	1.94567e-16
ENSG00000234912	SNHG20	-0.411109	1.60566e-16
ENSG00000157306	ZFHX2-AS1	-0.411432	1.54273e-16
ENSG00000261490	AC005674.2	-0.413192	1.10758e-16
ENSG00000260257	AL035071.1	-0.415589	6.96707e-17
ENSG00000273893	AL133520.1	-0.415832	6.81298e-17
ENSG00000219665	ZNF433-AS1	-0.415899	6.81298e-17
ENSG00000280128	AL662795.2	-0.416562	6.2078e-17
ENSG00000275854	AC084824.4	-0.417012	5.82886e-17
ENSG00000276449	AC004076.2	-0.418796	4.15644e-17
ENSG00000279696	AP001273.1	-0.419788	3.49077e-17
ENSG00000231177	LINC00852	-0.420217	3.29847e-17
ENSG00000276148	AC084824.5	-0.421327	2.70611e-17
ENSG00000232611	AL683813.1	-0.422271	2.29996e-17
ENSG00000271009	AC116667.1	-0.42335	1.90076e-17
ENSG00000267280	TBX2-AS1	-0.423804	1.79385e-17
ENSG00000206417	H1FX-AS1	-0.423918	1.79385e-17
ENSG00000245849	RAD51-AS1	-0.427028	9.80627e-18
ENSG00000272077	AC124045.1	-0.428889	6.87186e-18
ENSG00000269399	AC008764.6	-0.430149	5.47887e-18
ENSG00000260751	AC008870.2	-0.432483	3.46432e-18
ENSG00000272153	AL365330.1	-0.432887	3.33172e-18
ENSG00000273015	AC008124.1	-0.43322	3.26192e-18
ENSG00000280332	AC020917.4	-0.437084	1.47675e-18
ENSG00000249087	ZNF436-AS1	-0.441569	5.77246e-19
ENSG00000261526	AC012615.1	-0.449475	1.02105e-19
ENSG00000271870	AC024060.2	-0.455331	2.80037e-20
ENSG00000261326	LINC01355	-0.458437	1.44391e-20
ENSG00000260296	AC095057.3	-0.461395	7.69752e-21
ENSG00000259972	AC009120.2	-0.468571	1.47079e-21
ENSG00000268189	AC005785.1	-0.475669	2.76899e-22
ENSG00000251615	AC104825.1	-0.476563	2.43415e-22
ENSG00000267481	AC011477.2	-0.481645	8.40021e-23
ENSG00000240291	AL450384.2	-0.484189	4.99916e-23
ENSG00000263272	AC004148.1	-0.488114	2.10853e-23
ENSG00000212694	LINC01089	-0.500579	9.15182e-25
ENSG00000269044	AC024075.2	-0.532323	1.70762e-28
ENSG00000271895	AL109811.2	-0.534187	1.45631e-28
ENSG00000224660	SH3BP5-AS1	-0.552459	9.50929e-31

## Sheet: LGG
Supplementary Ttable 7-3. Table of Glycolytic score associated lncRNA in LGG
Ensemble	Symbol	R	FDR
ENSG00000222041	CYTOR	0.486166	3.7536e-31
ENSG00000257702	LBX2-AS1	0.480428	2.34411e-30
ENSG00000265743	AC138207.5	0.477914	5.1602e-30
ENSG00000233038	AC011899.2	0.462025	6.24656e-28
ENSG00000172965	MIR4435-2HG	0.461204	7.79923e-28
ENSG00000245694	CRNDE	0.459366	1.33882e-27
ENSG00000267317	AC027307.2	0.455487	4.15669e-27
ENSG00000247774	PCED1B-AS1	0.454864	4.98877e-27
ENSG00000274565	AC080038.1	0.451048	1.52232e-26
ENSG00000246985	SOCS2-AS1	0.442902	1.53195e-25
ENSG00000232533	AC093673.1	0.441945	2.00045e-25
ENSG00000233901	LINC01503	0.44004	3.37502e-25
ENSG00000206337	HCP5	0.435477	1.17653e-24
ENSG00000233621	LINC01137	0.42752	9.8361e-24
ENSG00000233695	GAS6-AS1	0.426939	1.13974e-23
ENSG00000245532	NEAT1	0.426703	1.21089e-23
ENSG00000280153	AC133065.3	0.423216	3.06179e-23
ENSG00000264456	AC138207.4	0.422251	3.91322e-23
ENSG00000255737	AGAP2-AS1	0.422077	4.08579e-23
ENSG00000276855	AC015922.3	0.420106	6.8147e-23
ENSG00000226791	LINC02611	0.417339	1.37996e-22
ENSG00000228192	AL512353.1	0.406868	1.94445e-21
ENSG00000280206	AC026401.3	0.398396	1.52649e-20
ENSG00000272760	AC093726.1	0.390034	1.12128e-19
ENSG00000249859	PVT1	0.387797	1.87129e-19
ENSG00000268001	CARD8-AS1	0.387579	1.96632e-19
ENSG00000204261	PSMB8-AS1	0.382684	6.14637e-19
ENSG00000250742	LINC02381	0.380739	9.51302e-19
ENSG00000270055	AC127502.2	0.377582	1.9219e-18
ENSG00000267519	AC020916.1	0.377063	2.14571e-18
ENSG00000272523	LINC01023	0.374102	4.10178e-18
ENSG00000275830	AL390755.1	0.371534	7.25072e-18
ENSG00000232480	TGFB2-AS1	0.369067	1.23791e-17
ENSG00000230896	AL604028.1	0.366388	2.19605e-17
ENSG00000269958	AL049840.5	0.365926	2.41808e-17
ENSG00000188511	C22orf34	0.363717	3.88851e-17
ENSG00000184809	B3GALT5-AS1	0.358854	1.0891e-16
ENSG00000237149	ZNF503-AS2	0.358453	1.18323e-16
ENSG00000227039	ITGB2-AS1	0.357636	1.4007e-16
ENSG00000177337	DLGAP1-AS1	0.357595	1.40713e-16
ENSG00000224307	AL161785.1	0.35744	1.45148e-16
ENSG00000250786	SNHG18	0.351501	4.94206e-16
ENSG00000268713	AC005261.3	0.346259	1.4201e-15
ENSG00000223478	AL441992.1	0.345717	1.58645e-15
ENSG00000264278	ZNF236-DT	0.341957	3.35482e-15
ENSG00000268516	AC020915.2	0.33634	1.01578e-14
ENSG00000253549	CA3-AS1	0.332941	1.95514e-14
ENSG00000255874	LINC00346	0.332585	2.08715e-14
ENSG00000270001	AL121894.2	0.332144	2.25318e-14
ENSG00000226471	Z93930.2	0.331644	2.4827e-14
ENSG00000275457	AL117332.1	0.331177	2.7078e-14
ENSG00000223969	AC002456.1	0.329587	3.68166e-14
ENSG00000232453	LINC02777	0.328394	4.60921e-14
ENSG00000213904	LIPE-AS1	0.325676	7.639e-14
ENSG00000278709	NKILA	0.321694	1.59317e-13
ENSG00000262001	DLGAP1-AS2	0.318393	2.90179e-13
ENSG00000237424	FOXD2-AS1	0.316014	4.43826e-13
ENSG00000257303	AC073896.2	0.314495	5.78464e-13
ENSG00000240875	LINC00886	0.313191	7.32751e-13
ENSG00000270504	AL391422.4	0.311265	1.03104e-12
ENSG00000186594	MIR22HG	0.310634	1.15003e-12
ENSG00000233461	AL445524.1	0.310165	1.24904e-12
ENSG00000228436	AL139260.1	0.309337	1.44328e-12
ENSG00000117242	PINK1-AS	0.307521	1.9846e-12
ENSG00000255198	SNHG9	0.307324	2.05006e-12
ENSG00000273145	BX537318.1	0.306783	2.24678e-12
ENSG00000226067	LINC00623	0.30481	3.17155e-12
ENSG00000238164	TNFRSF14-AS1	0.304281	3.46537e-12
ENSG00000267058	AC006213.2	-0.300725	6.3552e-12
ENSG00000279019	AC009090.4	-0.301301	5.75043e-12
ENSG00000278917	AC006213.6	-0.301383	5.67684e-12
ENSG00000237399	PITRM1-AS1	-0.301463	5.60474e-12
ENSG00000271755	AL031118.1	-0.30151	5.5666e-12
ENSG00000247950	SEC24B-AS1	-0.301813	5.28458e-12
ENSG00000261094	AC007066.2	-0.302135	4.99896e-12
ENSG00000245888	NSMCE1-DT	-0.30217	4.97526e-12
ENSG00000257660	ADCY6-DT	-0.30221	4.94774e-12
ENSG00000225793	AL080250.1	-0.302293	4.88224e-12
ENSG00000275580	AC022306.2	-0.302609	4.62394e-12
ENSG00000280138	AC027290.2	-0.303564	3.90861e-12
ENSG00000261786	AC006058.1	-0.303574	3.90718e-12
ENSG00000266053	NDUFV2-AS1	-0.303585	3.90552e-12
ENSG00000280046	AC104581.4	-0.303803	3.76206e-12
ENSG00000274292	AC084018.2	-0.303941	3.67674e-12
ENSG00000259953	AL138756.1	-0.304289	3.46537e-12
ENSG00000273306	AC018690.1	-0.304372	3.41989e-12
ENSG00000273230	AC102953.2	-0.304644	3.26246e-12
ENSG00000279227	AC009303.4	-0.30547	2.82277e-12
ENSG00000267383	AC011447.3	-0.306244	2.46062e-12
ENSG00000247796	AC008966.1	-0.306493	2.35671e-12
ENSG00000234608	MAPKAPK5-AS1	-0.306719	2.26581e-12
ENSG00000267372	AC005330.1	-0.306734	2.26331e-12
ENSG00000271452	AC005034.5	-0.306826	2.2327e-12
ENSG00000223704	LINC01422	-0.306968	2.1796e-12
ENSG00000261799	AC007406.5	-0.307146	2.11379e-12
ENSG00000272509	AC087752.4	-0.307426	2.01559e-12
ENSG00000259976	AC093010.3	-0.307537	1.98154e-12
ENSG00000257135	ODC1-DT	-0.30758	1.96921e-12
ENSG00000258682	AL132989.1	-0.308184	1.76819e-12
ENSG00000259448	LINC02352	-0.308826	1.5765e-12
ENSG00000272767	JMJD1C-AS1	-0.308947	1.54453e-12
ENSG00000266962	AC067852.2	-0.30897	1.54065e-12
ENSG00000274220	AC009163.7	-0.309581	1.38286e-12
ENSG00000268362	AC092279.1	-0.309653	1.3669e-12
ENSG00000251615	AC104825.1	-0.309743	1.34664e-12
ENSG00000275329	AL138781.1	-0.310398	1.19895e-12
ENSG00000279722	AC007342.7	-0.310717	1.13454e-12
ENSG00000254461	AP001107.4	-0.310927	1.09345e-12
ENSG00000234492	RPL34-AS1	-0.311202	1.04131e-12
ENSG00000227741	AL121987.2	-0.311389	1.00942e-12
ENSG00000272758	AC083798.2	-0.311463	9.97409e-13
ENSG00000265148	TSPOAP1-AS1	-0.311914	9.1956e-13
ENSG00000267707	AC015961.2	-0.312847	7.75881e-13
ENSG00000271976	AC012467.2	-0.312861	7.75059e-13
ENSG00000239407	Z68871.1	-0.313012	7.55031e-13
ENSG00000204860	FAM201A	-0.313156	7.36363e-13
ENSG00000238198	LRIG2-DT	-0.313936	6.39625e-13
ENSG00000181798	LINC00471	-0.314342	5.94192e-13
ENSG00000278768	BACE1-AS	-0.314659	5.62028e-13
ENSG00000258824	AL122035.1	-0.314716	5.56994e-13
ENSG00000272654	AL358472.2	-0.314785	5.5077e-13
ENSG00000272777	AC019131.2	-0.31515	5.15512e-13
ENSG00000225733	FGD5-AS1	-0.315255	5.06392e-13
ENSG00000248866	USP46-AS1	-0.315497	4.84845e-13
ENSG00000232725	U52111.1	-0.315576	4.78485e-13
ENSG00000277151	AL138820.1	-0.315843	4.56022e-13
ENSG00000233230	AC079807.1	-0.315884	4.53271e-13
ENSG00000234741	GAS5	-0.316003	4.44012e-13
ENSG00000225032	AL162586.1	-0.316045	4.41993e-13
ENSG00000278864	AC055811.4	-0.316356	4.17702e-13
ENSG00000272320	AL445309.1	-0.316373	4.17028e-13
ENSG00000248559	AC109454.2	-0.316845	3.82458e-13
ENSG00000268471	MIR4453HG	-0.316985	3.73183e-13
ENSG00000225706	PTPRD-AS1	-0.317092	3.66361e-13
ENSG00000271659	AL161729.4	-0.317545	3.37089e-13
ENSG00000265749	AC135178.4	-0.31793	3.14157e-13
ENSG00000249637	AC008438.1	-0.318057	3.07246e-13
ENSG00000270362	HMGN3-AS1	-0.318269	2.95693e-13
ENSG00000272375	AC026979.3	-0.318333	2.92664e-13
ENSG00000237036	ZEB1-AS1	-0.318387	2.90179e-13
ENSG00000278041	AL133325.3	-0.318556	2.81982e-13
ENSG00000205930	C21orf62-AS1	-0.319023	2.58642e-13
ENSG00000272812	AC004908.2	-0.319069	2.56832e-13
ENSG00000279822	AC016397.2	-0.31919	2.51441e-13
ENSG00000247317	LY6E-DT	-0.319596	2.33303e-13
ENSG00000246379	AC040168.1	-0.319605	2.33284e-13
ENSG00000253200	AC037459.2	-0.319852	2.23024e-13
ENSG00000228506	AL513550.1	-0.320005	2.16984e-13
ENSG00000261586	AC068987.3	-0.320667	1.91761e-13
ENSG00000245975	AC090515.2	-0.320786	1.87778e-13
ENSG00000245573	BDNF-AS	-0.320799	1.87627e-13
ENSG00000248932	AC046134.2	-0.320908	1.84088e-13
ENSG00000242516	LINC00960	-0.321255	1.72609e-13
ENSG00000240449	AC005586.1	-0.321501	1.65022e-13
ENSG00000186615	KTN1-AS1	-0.321813	1.55998e-13
ENSG00000240207	AC080013.1	-0.322369	1.40544e-13
ENSG00000260884	AC009120.3	-0.32245	1.38626e-13
ENSG00000277687	AL139407.1	-0.322558	1.36036e-13
ENSG00000271882	AP001330.4	-0.322558	1.36036e-13
ENSG00000226913	BSN-DT	-0.322689	1.33095e-13
ENSG00000257261	AC008014.1	-0.323278	1.19129e-13
ENSG00000271966	AC021321.1	-0.323698	1.10102e-13
ENSG00000205041	AC118344.1	-0.323733	1.09548e-13
ENSG00000278834	AC073508.3	-0.32396	1.05062e-13
ENSG00000260625	AC026471.2	-0.32411	1.02242e-13
ENSG00000227906	SNAP25-AS1	-0.324387	9.71138e-14
ENSG00000260804	LINC01963	-0.324515	9.4904e-14
ENSG00000223764	LINC02593	-0.324599	9.35384e-14
ENSG00000228343	AC115618.2	-0.325475	7.91494e-14
ENSG00000270012	AC232271.1	-0.325482	7.91494e-14
ENSG00000212694	LINC01089	-0.326351	6.7153e-14
ENSG00000189419	SPATA41	-0.327221	5.68285e-14
ENSG00000231419	LINC00689	-0.32725	5.66026e-14
ENSG00000279117	AP001972.5	-0.327251	5.66026e-14
ENSG00000275620	AL121827.2	-0.327484	5.4273e-14
ENSG00000261101	AC234775.3	-0.327652	5.26228e-14
ENSG00000250091	DNAH10OS	-0.327879	5.0427e-14
ENSG00000206573	THUMPD3-AS1	-0.328078	4.85952e-14
ENSG00000205559	CHKB-DT	-0.328126	4.82272e-14
ENSG00000258768	AL356019.2	-0.328224	4.73933e-14
ENSG00000226180	AC010536.1	-0.328264	4.71071e-14
ENSG00000272405	AL365181.3	-0.328268	4.71071e-14
ENSG00000272836	AL022328.1	-0.328533	4.49376e-14
ENSG00000259407	AC021739.2	-0.328701	4.35627e-14
ENSG00000248671	ALG1L9P	-0.328964	4.14517e-14
ENSG00000258844	AL162511.1	-0.329229	3.94248e-14
ENSG00000260563	AC132872.1	-0.330344	3.17904e-14
ENSG00000279833	AL031846.2	-0.330862	2.87652e-14
ENSG00000260565	ERVK13-1	-0.331192	2.70459e-14
ENSG00000251396	LINC01301	-0.331429	2.58585e-14
ENSG00000259420	AC046168.2	-0.332186	2.23863e-14
ENSG00000245317	AC008393.1	-0.332392	2.15295e-14
ENSG00000254604	AP002336.2	-0.332453	2.13073e-14
ENSG00000260306	AC092375.2	-0.33251	2.11054e-14
ENSG00000278238	AL359513.1	-0.332542	2.10121e-14
ENSG00000228544	CCDC183-AS1	-0.332911	1.95997e-14
ENSG00000273091	AP000255.1	-0.332931	1.95576e-14
ENSG00000234912	SNHG20	-0.333036	1.92229e-14
ENSG00000260630	SNAI3-AS1	-0.333665	1.69942e-14
ENSG00000271780	AL118558.3	-0.333729	1.68116e-14
ENSG00000230555	AL450326.1	-0.333815	1.65544e-14
ENSG00000275854	AC084824.4	-0.334362	1.4874e-14
ENSG00000258548	LINC00645	-0.334666	1.4023e-14
ENSG00000260213	AC092718.2	-0.334924	1.33434e-14
ENSG00000279873	LINC01126	-0.33547	1.19857e-14
ENSG00000237457	LINC01351	-0.335499	1.19374e-14
ENSG00000235298	AL354733.3	-0.335691	1.15075e-14
ENSG00000240291	AL450384.2	-0.33577	1.13479e-14
ENSG00000247708	STX18-AS1	-0.336279	1.02646e-14
ENSG00000273002	AL355388.2	-0.336709	9.45017e-15
ENSG00000228010	AC073343.2	-0.336781	9.33102e-15
ENSG00000250326	AC104596.1	-0.336835	9.24721e-15
ENSG00000270171	AL359881.3	-0.337201	8.60625e-15
ENSG00000272097	AL024498.1	-0.337261	8.51826e-15
ENSG00000247572	CKMT2-AS1	-0.3383	6.9197e-15
ENSG00000233223	AC016876.1	-0.338474	6.69294e-15
ENSG00000273419	AC004877.1	-0.338702	6.40249e-15
ENSG00000262227	AC004771.3	-0.339208	5.78904e-15
ENSG00000278126	AC139768.1	-0.339242	5.76039e-15
ENSG00000228956	SATB1-AS1	-0.339268	5.7402e-15
ENSG00000265511	AC020558.2	-0.34003	4.92622e-15
ENSG00000251602	AL928654.1	-0.340074	4.8915e-15
ENSG00000203684	IBA57-DT	-0.340184	4.79242e-15
ENSG00000279382	AC018665.1	-0.340469	4.53008e-15
ENSG00000204055	AL158151.1	-0.341738	3.50251e-15
ENSG00000250988	SNHG21	-0.342069	3.28526e-15
ENSG00000226091	LINC00937	-0.342496	3.01503e-15
ENSG00000224924	LINC00320	-0.342933	2.76143e-15
ENSG00000267191	AC006213.3	-0.343317	2.55653e-15
ENSG00000277232	GTSE1-DT	-0.34353	2.45132e-15
ENSG00000260874	AC106820.5	-0.343646	2.39812e-15
ENSG00000280435	AC006058.4	-0.344093	2.1908e-15
ENSG00000280088	AC126474.2	-0.344461	2.03443e-15
ENSG00000228906	AL353804.1	-0.344687	1.94497e-15
ENSG00000203497	PDCD4-AS1	-0.344816	1.89757e-15
ENSG00000235026	DPP10-AS1	-0.345077	1.80109e-15
ENSG00000214870	AC004540.1	-0.345336	1.71022e-15
ENSG00000250365	AL139353.2	-0.345611	1.61861e-15
ENSG00000253320	AZIN1-AS1	-0.34628	1.41651e-15
ENSG00000268087	AC008764.2	-0.346376	1.3913e-15
ENSG00000279555	AC091181.1	-0.346425	1.37989e-15
ENSG00000274682	AC015540.1	-0.346547	1.34784e-15
ENSG00000235823	OLMALINC	-0.346574	1.34289e-15
ENSG00000260032	NORAD	-0.346851	1.27012e-15
ENSG00000224086	AC245452.1	-0.347359	1.1447e-15
ENSG00000246982	Z84485.1	-0.348002	1.00247e-15
ENSG00000228274	AL021707.2	-0.348529	8.99472e-16
ENSG00000204758	AC008429.1	-0.348541	8.98877e-16
ENSG00000255121	CCDC84-DT	-0.348684	8.74157e-16
ENSG00000272701	MESTIT1	-0.348923	8.3295e-16
ENSG00000260400	AL513534.2	-0.349422	7.51443e-16
ENSG00000279744	AC132938.5	-0.34952	7.37564e-16
ENSG00000274828	AC068473.5	-0.349685	7.13889e-16
ENSG00000272849	AC084018.1	-0.349699	7.1312e-16
ENSG00000224043	CCNT2-AS1	-0.349708	7.1312e-16
ENSG00000258301	VASH1-AS1	-0.350165	6.49031e-16
ENSG00000261777	AC012184.3	-0.350559	5.98416e-16
ENSG00000272631	AC067750.1	-0.350574	5.97719e-16
ENSG00000271551	AL355297.4	-0.351375	5.05484e-16
ENSG00000277829	AL031651.2	-0.351432	5.00456e-16
ENSG00000273008	AC010864.1	-0.351668	4.77948e-16
ENSG00000268201	AC020915.1	-0.35209	4.37873e-16
ENSG00000227256	MIS18A-AS1	-0.352355	4.14726e-16
ENSG00000246889	AP000487.1	-0.3524	4.11697e-16
ENSG00000225783	MIAT	-0.352525	4.01706e-16
ENSG00000235560	AC002310.1	-0.352553	4.00143e-16
ENSG00000280173	AC104447.1	-0.352617	3.95518e-16
ENSG00000235919	ASH1L-AS1	-0.353053	3.61156e-16
ENSG00000260589	STAM-AS1	-0.354334	2.75218e-16
ENSG00000226950	DANCR	-0.354366	2.73915e-16
ENSG00000272933	AL391121.1	-0.354522	2.65471e-16
ENSG00000273117	AC144652.1	-0.354681	2.57092e-16
ENSG00000260947	AL356489.2	-0.354827	2.4972e-16
ENSG00000267980	AC007292.1	-0.355068	2.37594e-16
ENSG00000251143	AP002490.1	-0.3551	2.36489e-16
ENSG00000267325	LINC01415	-0.355934	1.98068e-16
ENSG00000248668	OXCT1-AS1	-0.356086	1.92092e-16
ENSG00000224078	SNHG14	-0.356161	1.89418e-16
ENSG00000260918	AC107398.3	-0.356379	1.81094e-16
ENSG00000259762	AC021739.5	-0.356668	1.70491e-16
ENSG00000260236	AC099778.1	-0.35719	1.52626e-16
ENSG00000273261	AC092953.2	-0.357432	1.45148e-16
ENSG00000227036	LINC00511	-0.357599	1.40713e-16
ENSG00000273472	AC096733.2	-0.358074	1.27641e-16
ENSG00000259366	AC108449.2	-0.358123	1.26577e-16
ENSG00000279089	AC005839.1	-0.358313	1.21705e-16
ENSG00000253741	LNCOC1	-0.358487	1.17718e-16
ENSG00000231527	FAM27C	-0.359378	9.73699e-17
ENSG00000229520	LINC00404	-0.359614	9.27009e-17
ENSG00000244926	ALKBH3-AS1	-0.359637	9.24274e-17
ENSG00000280187	AC022107.1	-0.359992	8.57143e-17
ENSG00000245149	RNF139-AS1	-0.360051	8.48126e-17
ENSG00000228801	AC064807.1	-0.361046	6.83559e-17
ENSG00000279689	AC022400.7	-0.3613	6.47856e-17
ENSG00000260455	NBAT1	-0.361317	6.46915e-17
ENSG00000280367	AP002364.1	-0.361584	6.11504e-17
ENSG00000277767	AL442128.2	-0.361858	5.77015e-17
ENSG00000261126	RBFADN	-0.361881	5.75327e-17
ENSG00000271086	NAMA	-0.362301	5.25756e-17
ENSG00000183154	AC138356.1	-0.36239	5.16717e-17
ENSG00000272853	AC069544.1	-0.362422	5.14145e-17
ENSG00000230590	FTX	-0.363157	4.3816e-17
ENSG00000245849	RAD51-AS1	-0.36362	3.96418e-17
ENSG00000261534	AL596244.1	-0.36439	3.35696e-17
ENSG00000255052	FAM66D	-0.364436	3.33063e-17
ENSG00000273148	LINC00653	-0.364464	3.31761e-17
ENSG00000250343	STK32A-AS1	-0.365106	2.88315e-17
ENSG00000273674	AC021752.1	-0.365262	2.79129e-17
ENSG00000271967	AL583856.2	-0.36532	2.76146e-17
ENSG00000272682	AC004471.2	-0.366066	2.34931e-17
ENSG00000272163	AF106564.1	-0.366084	2.34542e-17
ENSG00000269427	AC024075.3	-0.366432	2.17989e-17
ENSG00000264575	LINC00526	-0.366831	1.99822e-17
ENSG00000272977	AL008721.2	-0.366961	1.94541e-17
ENSG00000278916	CEP83-DT	-0.366969	1.94541e-17
ENSG00000274425	AC114271.1	-0.367849	1.60153e-17
ENSG00000260920	AL031985.3	-0.367991	1.55501e-17
ENSG00000279375	AC244517.7	-0.36825	1.47042e-17
ENSG00000260448	LCMT1-AS1	-0.368301	1.45707e-17
ENSG00000242808	SOX2-OT	-0.368553	1.38009e-17
ENSG00000249602	AL589765.4	-0.368856	1.29214e-17
ENSG00000230415	LINC01786	-0.368883	1.28727e-17
ENSG00000225138	SLC9A3-AS1	-0.369239	1.1935e-17
ENSG00000258515	AL355075.2	-0.369338	1.17008e-17
ENSG00000206129	AC006305.1	-0.369456	1.14205e-17
ENSG00000260464	AL049796.1	-0.369836	1.05043e-17
ENSG00000267309	AC092295.2	-0.370096	9.92788e-18
ENSG00000228606	AL139011.1	-0.370117	9.90599e-18
ENSG00000179935	LINC00652	-0.370244	9.64713e-18
ENSG00000266490	AC127024.5	-0.370663	8.7949e-18
ENSG00000243176	AC092944.1	-0.371124	7.94005e-18
ENSG00000240057	AC078785.1	-0.371553	7.2372e-18
ENSG00000279569	AC020763.4	-0.371799	6.8601e-18
ENSG00000255310	AF131215.5	-0.37188	6.75117e-18
ENSG00000279519	AC007382.1	-0.372083	6.46231e-18
ENSG00000275367	AC092111.1	-0.372557	5.81343e-18
ENSG00000280310	AC092437.1	-0.372813	5.49748e-18
ENSG00000280294	AC011008.2	-0.37412	4.0945e-18
ENSG00000255545	AP004608.1	-0.374259	3.9759e-18
ENSG00000260000	AL133338.1	-0.374665	3.63087e-18
ENSG00000267248	AC025048.2	-0.374725	3.59028e-18
ENSG00000255455	AP003486.1	-0.374971	3.4008e-18
ENSG00000261168	AL592424.1	-0.375557	2.97847e-18
ENSG00000272994	AC012360.3	-0.376007	2.69112e-18
ENSG00000224243	SOX1-OT	-0.376393	2.46738e-18
ENSG00000280152	AC009078.3	-0.376511	2.40742e-18
ENSG00000236432	AC097662.1	-0.376685	2.31826e-18
ENSG00000260083	MIR762HG	-0.376696	2.31826e-18
ENSG00000267481	AC011477.2	-0.376723	2.30967e-18
ENSG00000188825	LINC00910	-0.376935	2.2044e-18
ENSG00000260249	AC007608.3	-0.377105	2.13021e-18
ENSG00000260196	AC124798.1	-0.377434	1.97895e-18
ENSG00000267731	AC005332.2	-0.377478	1.96387e-18
ENSG00000250198	LINC02199	-0.378272	1.64097e-18
ENSG00000215039	CD27-AS1	-0.378843	1.4402e-18
ENSG00000255559	ZNF252P-AS1	-0.37887	1.4349e-18
ENSG00000260855	AL591848.4	-0.37887	1.4349e-18
ENSG00000262410	AC024361.1	-0.379256	1.31827e-18
ENSG00000267100	ILF3-DT	-0.37954	1.23673e-18
ENSG00000269038	AP001462.1	-0.379856	1.15156e-18
ENSG00000227388	AL133410.1	-0.380048	1.10388e-18
ENSG00000224358	TMCO1-AS1	-0.380149	1.08093e-18
ENSG00000267904	AC024075.1	-0.380189	1.07373e-18
ENSG00000270059	AC121493.1	-0.3802	1.07373e-18
ENSG00000276517	AL133243.3	-0.380654	9.67839e-19
ENSG00000259920	AC007938.1	-0.380925	9.12962e-19
ENSG00000229191	AL358473.1	-0.38137	8.24546e-19
ENSG00000280351	AC127496.7	-0.381941	7.22656e-19
ENSG00000225465	RFPL1S	-0.38209	6.99601e-19
ENSG00000272902	TBC1D8-AS1	-0.382393	6.53037e-19
ENSG00000237126	AC073254.1	-0.382496	6.39086e-19
ENSG00000279407	AC007191.1	-0.3825	6.39086e-19
ENSG00000215481	BCRP3	-0.382895	5.86372e-19
ENSG00000272372	AC009102.2	-0.383579	4.99935e-19
ENSG00000248015	AC005329.1	-0.383964	4.57579e-19
ENSG00000237410	AP001092.1	-0.384313	4.22358e-19
ENSG00000256742	KDM2B-DT	-0.384863	3.71546e-19
ENSG00000196741	LINC01560	-0.385405	3.27371e-19
ENSG00000271265	AL355297.3	-0.385416	3.27371e-19
ENSG00000197815	AC122129.1	-0.386088	2.79604e-19
ENSG00000279135	AL512652.2	-0.387057	2.22279e-19
ENSG00000259416	AC021739.3	-0.387944	1.8113e-19
ENSG00000259623	AC125257.1	-0.388318	1.65989e-19
ENSG00000235954	TTC28-AS1	-0.388437	1.61729e-19
ENSG00000261474	AC026471.4	-0.38844	1.61729e-19
ENSG00000273486	AC096992.2	-0.38863	1.55289e-19
ENSG00000225670	CADM3-AS1	-0.388696	1.53264e-19
ENSG00000273270	AC090114.2	-0.389135	1.38233e-19
ENSG00000205959	AC105345.1	-0.38981	1.17727e-19
ENSG00000267128	RNF157-AS1	-0.390023	1.12128e-19
ENSG00000225484	NUTM2B-AS1	-0.39032	1.04943e-19
ENSG00000271533	Z83843.1	-0.391065	8.78238e-20
ENSG00000251034	AC087854.1	-0.391294	8.33049e-20
ENSG00000242759	LINC00882	-0.391919	7.17335e-20
ENSG00000273001	AL731533.2	-0.392023	7.01522e-20
ENSG00000251141	MRPS30-DT	-0.392853	5.74207e-20
ENSG00000227487	NCAM1-AS1	-0.393159	5.34411e-20
ENSG00000224738	AC099850.1	-0.393433	5.01136e-20
ENSG00000225439	BOLA3-AS1	-0.394097	4.26949e-20
ENSG00000259891	AC107375.1	-0.394439	3.93706e-20
ENSG00000236197	AC002429.2	-0.394581	3.81315e-20
ENSG00000260285	AL133367.1	-0.394643	3.7668e-20
ENSG00000236308	AL138921.2	-0.394824	3.61357e-20
ENSG00000272973	AP000350.5	-0.395256	3.25797e-20
ENSG00000273329	AC078846.1	-0.39609	2.65888e-20
ENSG00000175061	SNHG29	-0.396132	2.63919e-20
ENSG00000273226	AL391834.2	-0.396223	2.58823e-20
ENSG00000274776	AC090241.3	-0.396411	2.47817e-20
ENSG00000272240	AC004908.1	-0.397547	1.87471e-20
ENSG00000267940	AC022762.2	-0.398249	1.57856e-20
ENSG00000258458	AL160314.2	-0.39887	1.36031e-20
ENSG00000223768	LINC00205	-0.399914	1.05073e-20
ENSG00000279453	Z99129.4	-0.400043	1.0205e-20
ENSG00000212719	LINC02693	-0.400556	8.99873e-21
ENSG00000263050	AC090617.5	-0.400765	8.56454e-21
ENSG00000281183	NPTN-IT1	-0.401326	7.46001e-21
ENSG00000228126	FALEC	-0.401434	7.28187e-21
ENSG00000272505	AC104964.4	-0.401644	6.92903e-21
ENSG00000263958	AC091138.1	-0.401725	6.81027e-21
ENSG00000273265	CNNM3-DT	-0.401914	6.51355e-21
ENSG00000274029	AC069209.1	-0.402336	5.87408e-21
ENSG00000228748	AL450306.1	-0.402358	5.85997e-21
ENSG00000277831	AL138960.1	-0.402807	5.24681e-21
ENSG00000281189	GHET1	-0.402821	5.24534e-21
ENSG00000247121	AC009126.1	-0.403421	4.52023e-21
ENSG00000279069	AC015813.5	-0.403538	4.40227e-21
ENSG00000232504	ST3GAL5-AS1	-0.40372	4.21669e-21
ENSG00000234056	LINC00463	-0.404986	3.06458e-21
ENSG00000224934	AL391684.1	-0.405046	3.02806e-21
ENSG00000261008	LINC01572	-0.40508	3.01191e-21
ENSG00000170919	TPT1-AS1	-0.405234	2.90545e-21
ENSG00000253641	AC104964.1	-0.405613	2.64651e-21
ENSG00000261478	AC013391.3	-0.406637	2.04245e-21
ENSG00000279198	AC008894.3	-0.406643	2.04245e-21
ENSG00000253352	TUG1	-0.406835	1.95418e-21
ENSG00000233178	AL161457.2	-0.408227	1.37473e-21
ENSG00000251867	AC009812.1	-0.408279	1.36136e-21
ENSG00000205632	LINC01310	-0.408972	1.14202e-21
ENSG00000277142	LINC00235	-0.409426	1.01875e-21
ENSG00000226530	AL158055.1	-0.409644	9.66211e-22
ENSG00000273702	AC091271.1	-0.409799	9.31211e-22
ENSG00000227540	AC016394.1	-0.410646	7.49939e-22
ENSG00000259985	AC017100.1	-0.410741	7.34126e-22
ENSG00000261451	AC104964.3	-0.411666	5.78949e-22
ENSG00000258957	AL359317.2	-0.412055	5.24769e-22
ENSG00000271147	ARMCX5-GPRASP2	-0.412121	5.17615e-22
ENSG00000227354	RBM26-AS1	-0.412408	4.81945e-22
ENSG00000257703	AC068643.1	-0.412827	4.33387e-22
ENSG00000279488	AC004623.1	-0.413144	4.00175e-22
ENSG00000245146	MALINC1	-0.413179	3.97989e-22
ENSG00000257585	LINC00609	-0.414182	3.06857e-22
ENSG00000233452	STXBP5-AS1	-0.41445	2.86943e-22
ENSG00000245832	MIR4300HG	-0.41461	2.76082e-22
ENSG00000261366	MANEA-DT	-0.414667	2.72952e-22
ENSG00000253106	AC090198.1	-0.414798	2.64665e-22
ENSG00000242797	GLYCTK-AS1	-0.416272	1.7985e-22
ENSG00000234494	SP2-AS1	-0.416575	1.66577e-22
ENSG00000235706	DICER1-AS1	-0.416714	1.61161e-22
ENSG00000224812	TMEM72-AS1	-0.416899	1.54003e-22
ENSG00000235072	AC012074.1	-0.417067	1.47814e-22
ENSG00000257126	FOXG1-AS1	-0.417416	1.35722e-22
ENSG00000247675	LRP4-AS1	-0.417611	1.29324e-22
ENSG00000272447	AL135925.1	-0.417961	1.18274e-22
ENSG00000260233	SSSCA1-AS1	-0.418677	9.80522e-23
ENSG00000272905	AC018648.1	-0.418703	9.77571e-23
ENSG00000213062	Z99572.1	-0.41877	9.63716e-23
ENSG00000263843	AC022211.2	-0.41939	8.1962e-23
ENSG00000260296	AC095057.3	-0.419925	7.12718e-23
ENSG00000262873	AC127496.5	-0.420344	6.41834e-23
ENSG00000260267	AC026471.1	-0.421221	5.08769e-23
ENSG00000263072	ZNF213-AS1	-0.421544	4.68116e-23
ENSG00000230454	U73166.1	-0.42163	4.59193e-23
ENSG00000225472	AL136366.1	-0.422514	3.65938e-23
ENSG00000279894	Z73965.1	-0.423065	3.16442e-23
ENSG00000254837	AP001372.2	-0.423103	3.1445e-23
ENSG00000279536	AC093458.2	-0.424881	1.95375e-23
ENSG00000244733	AL132656.2	-0.42541	1.69758e-23
ENSG00000264515	AC011474.1	-0.425747	1.55469e-23
ENSG00000260329	AC007541.1	-0.425842	1.52068e-23
ENSG00000255717	SNHG1	-0.426136	1.40899e-23
ENSG00000254035	AC104117.3	-0.427128	1.0865e-23
ENSG00000276791	AC092117.1	-0.427326	1.03316e-23
ENSG00000263753	LINC00667	-0.427862	8.98953e-24
ENSG00000280255	AC004947.2	-0.427906	8.91663e-24
ENSG00000226688	ENTPD1-AS1	-0.428094	8.50202e-24
ENSG00000279792	AC015909.5	-0.428277	8.11788e-24
ENSG00000278576	AL162171.3	-0.428598	7.46164e-24
ENSG00000244879	GABPB1-AS1	-0.429281	6.20349e-24
ENSG00000281649	EBLN3P	-0.429852	5.31902e-24
ENSG00000272148	AC013403.2	-0.43011	4.97283e-24
ENSG00000262879	AC005670.3	-0.430235	4.82402e-24
ENSG00000273308	AC024560.3	-0.430563	4.42213e-24
ENSG00000277938	AL035252.3	-0.431808	3.13949e-24
ENSG00000242622	AC092910.3	-0.431865	3.10364e-24
ENSG00000259495	AC016705.2	-0.432039	2.96926e-24
ENSG00000259488	AC023355.1	-0.43332	2.08338e-24
ENSG00000245281	AC124242.1	-0.433681	1.89079e-24
ENSG00000275450	AL845472.1	-0.433917	1.77739e-24
ENSG00000235437	LINC01278	-0.43392	1.77739e-24
ENSG00000227896	AL731569.1	-0.434593	1.48275e-24
ENSG00000230699	AL645608.2	-0.434632	1.47324e-24
ENSG00000177335	C8orf31	-0.434716	1.44525e-24
ENSG00000280193	AC132219.2	-0.43525	1.24873e-24
ENSG00000261167	AC107027.3	-0.435623	1.13406e-24
ENSG00000279278	AC245060.6	-0.43601	1.0213e-24
ENSG00000254064	AC105206.2	-0.436849	8.0877e-25
ENSG00000207955	AL359091.1	-0.436972	7.84702e-25
ENSG00000255389	Z97989.1	-0.437654	6.49282e-25
ENSG00000279192	PWAR5	-0.438233	5.53173e-25
ENSG00000253704	AC023632.2	-0.438273	5.49472e-25
ENSG00000279348	AC012513.3	-0.438966	4.52902e-25
ENSG00000261186	LINC01238	-0.439955	3.42824e-25
ENSG00000245498	AP000866.1	-0.440026	3.37502e-25
ENSG00000259959	AC107068.1	-0.440148	3.29084e-25
ENSG00000245598	DACT3-AS1	-0.44149	2.24746e-25
ENSG00000197291	RAMP2-AS1	-0.441565	2.21042e-25
ENSG00000232611	AL683813.1	-0.441865	2.03666e-25
ENSG00000272562	AL512343.2	-0.442279	1.82534e-25
ENSG00000223546	LINC00630	-0.443351	1.35146e-25
ENSG00000272572	AL138762.1	-0.443406	1.33689e-25
ENSG00000270953	AC007938.3	-0.443863	1.17657e-25
ENSG00000261188	Z95115.1	-0.443915	1.1652e-25
ENSG00000161149	TUBA3FP	-0.443916	1.1652e-25
ENSG00000214432	VPS33B-DT	-0.444992	8.60284e-26
ENSG00000261195	AC027130.1	-0.445625	7.18655e-26
ENSG00000258342	AL133304.3	-0.445632	7.18655e-26
ENSG00000264589	MAPT-AS1	-0.448469	3.14914e-26
ENSG00000260641	AC114811.2	-0.448888	2.79729e-26
ENSG00000248092	NNT-AS1	-0.449288	2.49819e-26
ENSG00000256481	AP006333.2	-0.449769	2.17793e-26
ENSG00000236901	MIR600HG	-0.450578	1.72211e-26
ENSG00000278175	GLIDR	-0.450923	1.56254e-26
ENSG00000269609	RPARP-AS1	-0.450947	1.56009e-26
ENSG00000224165	DNAJC27-AS1	-0.452624	9.56261e-27
ENSG00000224888	AC138028.2	-0.453919	6.52057e-27
ENSG00000234690	EPCAM-DT	-0.45468	5.21445e-27
ENSG00000262155	LINC02175	-0.454695	5.21445e-27
ENSG00000225234	TRAPPC12-AS1	-0.455676	3.94873e-27
ENSG00000267002	AC060780.1	-0.455768	3.8624e-27
ENSG00000180458	AC022148.1	-0.45649	3.1221e-27
ENSG00000247735	AC120114.1	-0.457208	2.52482e-27
ENSG00000270638	AL023806.1	-0.457854	2.08662e-27
ENSG00000267632	AC067852.3	-0.45829	1.83778e-27
ENSG00000273015	AC008124.1	-0.459013	1.48247e-27
ENSG00000278627	AC005962.1	-0.459449	1.31281e-27
ENSG00000261251	Z97055.2	-0.460455	9.70168e-28
ENSG00000230319	AL022476.1	-0.461002	8.24983e-28
ENSG00000235903	CPB2-AS1	-0.461299	7.62084e-28
ENSG00000250790	AC127070.2	-0.461325	7.60674e-28
ENSG00000235381	AL596202.1	-0.461826	6.55864e-28
ENSG00000276417	AC092111.2	-0.461846	6.5584e-28
ENSG00000273729	AC007686.3	-0.462126	6.09327e-28
ENSG00000279879	AC091152.4	-0.462423	5.59356e-28
ENSG00000213963	AC019080.1	-0.462537	5.43431e-28
ENSG00000272791	AC073389.3	-0.462568	5.417e-28
ENSG00000254635	WAC-AS1	-0.463486	4.10237e-28
ENSG00000179523	EIF3J-DT	-0.463773	3.77766e-28
ENSG00000213057	C1orf220	-0.464065	3.47314e-28
ENSG00000227811	INKA2-AS1	-0.464946	2.65718e-28
ENSG00000247400	DNAJC3-DT	-0.465652	2.14608e-28
ENSG00000227908	AC016596.1	-0.465775	2.07917e-28
ENSG00000253854	AC010834.3	-0.466199	1.83271e-28
ENSG00000245526	LINC00461	-0.466222	1.83194e-28
ENSG00000230565	ZNF32-AS2	-0.466591	1.6433e-28
ENSG00000226578	AL132657.1	-0.469114	7.47891e-29
ENSG00000231187	AL356056.2	-0.469359	6.96894e-29
ENSG00000254966	AC103974.1	-0.469573	6.5584e-29
ENSG00000223891	OSER1-DT	-0.469883	5.98622e-29
ENSG00000261420	AL022069.1	-0.470261	5.34835e-29
ENSG00000268798	AC027307.3	-0.470311	5.30131e-29
ENSG00000260966	AP001486.2	-0.47045	5.11013e-29
ENSG00000225978	HAR1A	-0.470631	4.85966e-29
ENSG00000274422	AC245060.5	-0.470818	4.6126e-29
ENSG00000280254	AC233723.2	-0.47095	4.45591e-29
ENSG00000278156	TSC22D1-AS1	-0.471318	3.9924e-29
ENSG00000235597	LINC01102	-0.47146	3.84404e-29
ENSG00000280385	AP000648.4	-0.471658	3.63622e-29
ENSG00000253738	OTUD6B-AS1	-0.473831	1.82864e-29
ENSG00000253553	AC090578.1	-0.47452	1.47621e-29
ENSG00000279685	MAPT-IT1	-0.475219	1.18767e-29
ENSG00000269489	AL589765.6	-0.476062	9.11668e-30
ENSG00000279059	AC007485.2	-0.476955	6.88004e-30
ENSG00000272501	AL662844.4	-0.477399	6.00408e-30
ENSG00000226200	SGMS1-AS1	-0.477754	5.39307e-30
ENSG00000268584	AC073389.1	-0.479305	3.30505e-30
ENSG00000224914	LINC00863	-0.47943	3.1979e-30
ENSG00000280355	AL132656.4	-0.480201	2.50514e-30
ENSG00000204241	LINC02731	-0.480684	2.17355e-30
ENSG00000261227	AC140912.1	-0.480871	2.06122e-30
ENSG00000167912	AC090152.1	-0.480968	2.01366e-30
ENSG00000267470	ZNF571-AS1	-0.482503	1.22437e-30
ENSG00000185065	AC000068.1	-0.483566	8.68898e-31
ENSG00000280870	AC233296.1	-0.48553	4.5608e-31
ENSG00000233723	LINC01122	-0.485687	4.36619e-31
ENSG00000234281	LANCL1-AS1	-0.486301	3.61899e-31
ENSG00000278989	AP001148.1	-0.486401	3.5318e-31
ENSG00000229852	AC019205.1	-0.486406	3.5318e-31
ENSG00000232640	AL354892.2	-0.487171	2.77866e-31
ENSG00000232044	SILC1	-0.489169	1.43151e-31
ENSG00000231889	TRAF3IP2-AS1	-0.489806	1.16502e-31
ENSG00000170161	AL512625.1	-0.490708	8.66353e-32
ENSG00000247556	OIP5-AS1	-0.490717	8.66353e-32
ENSG00000272008	AL139274.2	-0.49106	7.83355e-32
ENSG00000226009	KCNIP2-AS1	-0.491468	6.88599e-32
ENSG00000233718	MYCNOS	-0.491744	6.32939e-32
ENSG00000230091	TMEM254-AS1	-0.492332	5.23125e-32
ENSG00000269707	AC018730.1	-0.493123	4.03292e-32
ENSG00000246308	AC116535.1	-0.493169	4.00934e-32
ENSG00000226711	FAM66C	-0.493458	3.66958e-32
ENSG00000255182	AC084125.2	-0.494398	2.68504e-32
ENSG00000279255	Z97653.2	-0.494953	2.24187e-32
ENSG00000279145	AC011912.1	-0.495611	1.80593e-32
ENSG00000246763	RGMB-AS1	-0.498358	7.04495e-33
ENSG00000254602	AP000662.1	-0.498999	5.69602e-33
ENSG00000272263	AC034198.2	-0.50011	3.90418e-33
ENSG00000215424	MCM3AP-AS1	-0.500826	3.07166e-33
ENSG00000279456	AL353763.1	-0.500974	2.94806e-33
ENSG00000232287	SLC6A1-AS1	-0.500995	2.94806e-33
ENSG00000247970	AL160313.1	-0.502218	1.94665e-33
ENSG00000213888	LINC01521	-0.503304	1.34162e-33
ENSG00000233396	LINC01719	-0.504161	1.00176e-33
ENSG00000225127	LINC00237	-0.505672	5.92179e-34
ENSG00000272918	AC005070.3	-0.506056	5.22459e-34
ENSG00000231074	HCG18	-0.506093	5.21865e-34
ENSG00000258708	SLC25A21-AS1	-0.507493	3.2006e-34
ENSG00000205740	AL359878.1	-0.508393	2.34508e-34
ENSG00000226508	LINC01918	-0.509893	1.38201e-34
ENSG00000260807	AC009041.2	-0.510617	1.07684e-34
ENSG00000260118	AL157700.1	-0.511412	8.1719e-35
ENSG00000229422	AL512625.2	-0.511443	8.1719e-35
ENSG00000258057	BCDIN3D-AS1	-0.513116	4.50741e-35
ENSG00000261839	AL358933.1	-0.513821	3.52842e-35
ENSG00000242242	NECTIN3-AS1	-0.519866	3.81966e-36
ENSG00000274718	AL136964.1	-0.520392	3.18012e-36
ENSG00000157306	ZFHX2-AS1	-0.523192	1.12452e-36
ENSG00000260917	AL158212.3	-0.523352	1.07362e-36
ENSG00000257647	AC124312.2	-0.523878	8.92311e-37
ENSG00000232110	AL353751.1	-0.523974	8.72966e-37
ENSG00000248858	AC104211.1	-0.525553	4.86191e-37
ENSG00000265579	AC023301.1	-0.525673	4.71453e-37
ENSG00000247199	AC011346.1	-0.526095	4.07433e-37
ENSG00000280798	LINC00294	-0.526303	3.82063e-37
ENSG00000230910	AL391807.1	-0.527208	2.74482e-37
ENSG00000229980	TOB1-AS1	-0.529001	1.40031e-37
ENSG00000250616	AC012645.1	-0.529095	1.37221e-37
ENSG00000279675	AC080100.1	-0.530993	6.69765e-38
ENSG00000259218	LINC00928	-0.531232	6.20516e-38
ENSG00000215241	LINC02449	-0.531262	6.20516e-38
ENSG00000262223	AC110285.1	-0.533408	2.7501e-38
ENSG00000203288	TDRKH-AS1	-0.534237	2.02272e-38
ENSG00000260633	AC010207.1	-0.535798	1.11452e-38
ENSG00000280057	AL022069.2	-0.535833	1.11452e-38
ENSG00000229953	AL590666.2	-0.536553	8.58068e-39
ENSG00000239415	AP001469.3	-0.537666	5.6255e-39
ENSG00000231154	MORF4L2-AS1	-0.537685	5.6255e-39
ENSG00000253230	LINC00599	-0.538577	4.07217e-39
ENSG00000259877	AC009113.1	-0.539792	2.55835e-39
ENSG00000273343	AC007663.4	-0.539944	2.45696e-39
ENSG00000260572	AC069224.1	-0.540539	1.97643e-39
ENSG00000272079	AC004233.2	-0.541305	1.485e-39
ENSG00000267565	AC011477.3	-0.542054	1.12291e-39
ENSG00000279161	AC093503.3	-0.542153	1.10269e-39
ENSG00000270589	AL158163.1	-0.543725	5.97969e-40
ENSG00000238058	AL355574.1	-0.54406	5.34165e-40
ENSG00000228624	HDAC2-AS2	-0.548298	9.70086e-41
ENSG00000248587	GDNF-AS1	-0.548487	9.19285e-41
ENSG00000260664	AC004158.1	-0.548747	8.46894e-41
ENSG00000260686	AC008669.1	-0.551404	2.89437e-41
ENSG00000261675	AL022313.4	-0.552942	1.56596e-41
ENSG00000258441	LINC00641	-0.55372	1.16166e-41
ENSG00000256925	ADGRA1-AS1	-0.555765	5.05691e-42
ENSG00000281538	AC254562.3	-0.556022	4.66561e-42
ENSG00000227432	AC053503.1	-0.556191	4.47286e-42
ENSG00000254528	AP000757.1	-0.556344	4.31962e-42
ENSG00000279561	AL845472.2	-0.557958	2.24885e-42
ENSG00000224023	EDRF1-DT	-0.559751	1.08159e-42
ENSG00000259840	Z97653.1	-0.561026	6.47562e-43
ENSG00000224032	EPB41L4A-AS1	-0.561307	5.93767e-43
ENSG00000259994	AL353796.1	-0.56156	5.51483e-43
ENSG00000277200	AC005696.4	-0.566392	7.04359e-44
ENSG00000278867	AC090616.6	-0.572829	4.25445e-45
ENSG00000274698	AC099521.1	-0.574212	2.382e-45
ENSG00000245750	DRAIC	-0.574772	1.92893e-45
ENSG00000278192	AL118505.1	-0.579823	2.03503e-46
ENSG00000271270	TMCC1-AS1	-0.581602	9.40227e-47
ENSG00000279696	AP001273.1	-0.584575	2.48723e-47
ENSG00000229589	ACVR2B-AS1	-0.58971	2.34417e-48
ENSG00000271913	AL035530.2	-0.591493	1.05772e-48
ENSG00000255571	MIR9-3HG	-0.59277	6.06791e-49
ENSG00000254377	MIR124-2HG	-0.595026	2.17193e-49
ENSG00000277182	AC006449.5	-0.59525	2.07166e-49
ENSG00000255366	AC120036.4	-0.595393	2.06254e-49
ENSG00000238197	PAXBP1-AS1	-0.597325	8.66095e-50
ENSG00000224675	AC009227.1	-0.597841	7.2563e-50
ENSG00000250132	AC004803.1	-0.599294	3.86461e-50
ENSG00000237037	NDUFA6-DT	-0.600378	2.4768e-50
ENSG00000203930	LINC00632	-0.604847	2.97383e-51
ENSG00000267750	RUNDC3A-AS1	-0.607497	8.74192e-52
ENSG00000248184	LINC02283	-0.611701	1.1617e-52
ENSG00000239665	AL157392.3	-0.611787	1.1617e-52
ENSG00000261098	AP000766.1	-0.613676	5.61856e-53
ENSG00000273032	DGCR9	-0.616796	1.33789e-53
ENSG00000272983	AL117339.4	-0.628592	3.12599e-56
ENSG00000272316	AL021368.2	-0.635026	1.20701e-57
ENSG00000243902	FP325335.1	-0.637068	5.77905e-58
ENSG00000280128	AL662795.2	-0.662379	3.89884e-64

## Sheet: MESO
Supplementary Ttable 7-4. Table of Glycolytic score associated lncRNA in MESO
Ensemble	Symbol	R	FDR
ENSG00000172965	MIR4435-2HG	0.594964	1.69221e-06
ENSG00000256940	PPP1R14B-AS1	0.571195	6.56135e-06
ENSG00000253414	AC124067.2	0.558176	1.21847e-05
ENSG00000222041	CYTOR	0.548406	1.8772e-05
ENSG00000225383	SFTA1P	0.520728	6.79576e-05
ENSG00000233461	AL445524.1	0.504549	0.000148325
ENSG00000232533	AC093673.1	0.492263	0.000232006
ENSG00000279227	AC009303.4	0.490059	0.000241719
ENSG00000224897	POT1-AS1	0.480649	0.000372916
ENSG00000241990	PRR34-AS1	0.464408	0.000757013
ENSG00000257605	AC073611.1	0.459874	0.000767879
ENSG00000224397	SMIM25	0.458691	0.000767879
ENSG00000231890	DARS-AS1	0.454949	0.000881568
ENSG00000261061	AC092718.4	0.450594	0.00104244
ENSG00000237181	AC147651.4	0.445445	0.00122778
ENSG00000255737	AGAP2-AS1	0.417235	0.00316967
ENSG00000279095	AC243964.4	0.41473	0.00343543
ENSG00000274605	PCCA-DT	0.396456	0.00649813
ENSG00000205559	CHKB-DT	0.393493	0.00682914
ENSG00000273038	AL365203.2	0.392448	0.00696491
ENSG00000251442	LINC01094	0.391098	0.00719365
ENSG00000203711	C6orf99	0.376461	0.0105505
ENSG00000280206	AC026401.3	0.374262	0.0106441
ENSG00000247095	MIR210HG	0.367685	0.0120281
ENSG00000230615	AL139220.2	0.364369	0.012844
ENSG00000278709	NKILA	0.349007	0.0186743
ENSG00000223478	AL441992.1	0.344218	0.0210781
ENSG00000233452	STXBP5-AS1	0.316251	0.0372579
ENSG00000246695	RASSF8-AS1	-0.315406	0.0379644
ENSG00000267244	AC012615.6	-0.321729	0.0336784
ENSG00000212694	LINC01089	-0.330887	0.0284207
ENSG00000260296	AC095057.3	-0.333451	0.0267915
ENSG00000145075	CCDC39	-0.336084	0.0252431
ENSG00000271533	Z83843.1	-0.34024	0.0231296
ENSG00000281005	LINC00921	-0.341466	0.0224203
ENSG00000272918	AC005070.3	-0.342188	0.0221106
ENSG00000269893	SNHG8	-0.344846	0.0208572
ENSG00000235016	SEMA3F-AS1	-0.359275	0.0142808
ENSG00000275854	AC084824.4	-0.359342	0.0142808
ENSG00000272106	AL691432.2	-0.359697	0.0142808
ENSG00000224272	AC131097.2	-0.362685	0.0132941
ENSG00000179818	PCBP1-AS1	-0.363838	0.0129181
ENSG00000272374	Z97832.2	-0.366403	0.0124021
ENSG00000226200	SGMS1-AS1	-0.368454	0.0119752
ENSG00000162913	OBSCN-AS1	-0.36918	0.0119094
ENSG00000281026	N4BP2L2-IT2	-0.374264	0.0106441
ENSG00000224032	EPB41L4A-AS1	-0.375259	0.0106441
ENSG00000235257	ITGA9-AS1	-0.376302	0.0105505
ENSG00000246877	DNM1P35	-0.377572	0.0104215
ENSG00000259972	AC009120.2	-0.383514	0.00843253
ENSG00000237037	NDUFA6-DT	-0.383648	0.00843253
ENSG00000224914	LINC00863	-0.383788	0.00843253
ENSG00000241769	LINC00893	-0.384867	0.00843253
ENSG00000270344	POC1B-AS1	-0.385447	0.00843253
ENSG00000228544	CCDC183-AS1	-0.3855	0.00843253
ENSG00000261485	PAN3-AS1	-0.387921	0.00799235
ENSG00000260565	ERVK13-1	-0.394443	0.00672447
ENSG00000259891	AC107375.1	-0.394967	0.00672447
ENSG00000227946	AC007383.2	-0.399847	0.00579584
ENSG00000248866	USP46-AS1	-0.406046	0.00459187
ENSG00000251034	AC087854.1	-0.406728	0.00457929
ENSG00000263069	RNF213-AS1	-0.411962	0.00376539
ENSG00000180769	WDFY3-AS2	-0.418249	0.00312157
ENSG00000272316	AL021368.2	-0.420063	0.00297051
ENSG00000229589	ACVR2B-AS1	-0.424547	0.00251182
ENSG00000260686	AC008669.1	-0.429163	0.00210754
ENSG00000239665	AL157392.3	-0.42991	0.00210536
ENSG00000273156	AC124016.2	-0.430789	0.0020928
ENSG00000273015	AC008124.1	-0.432777	0.00197971
ENSG00000247950	SEC24B-AS1	-0.434634	0.00188541
ENSG00000205930	C21orf62-AS1	-0.44038	0.00149951
ENSG00000272631	AC067750.1	-0.446103	0.00122778
ENSG00000245849	RAD51-AS1	-0.458986	0.000767879
ENSG00000244879	GABPB1-AS1	-0.459205	0.000767879
ENSG00000231160	KLF3-AS1	-0.462159	0.000767879
ENSG00000262877	AC110285.2	-0.465185	0.000757013
ENSG00000259976	AC093010.3	-0.498291	0.000180952
ENSG00000277449	CEBPB-AS1	-0.503482	0.000148325
ENSG00000241158	ADAMTS9-AS1	-0.520576	6.79576e-05
ENSG00000260966	AP001486.2	-0.533476	4.09355e-05
ENSG00000280339	AP001528.2	-0.598683	1.69221e-06

## Sheet: PAAD
Supplementary Ttable 7-5. Table of Glycolytic score associated lncRNA in PAAD
Ensemble	Symbol	R	FDR
ENSG00000246228	CASC8	0.626176	2.23807e-18
ENSG00000247095	MIR210HG	0.600735	1.1463e-16
ENSG00000256940	PPP1R14B-AS1	0.55508	3.69806e-14
ENSG00000232803	SLCO4A1-AS1	0.551994	5.04878e-14
ENSG00000233818	AP000695.2	0.547891	8.45939e-14
ENSG00000272405	AL365181.3	0.542145	1.73501e-13
ENSG00000185332	AC027601.1	0.540823	2.04111e-13
ENSG00000251179	TMEM92-AS1	0.537695	2.96158e-13
ENSG00000273132	AL355312.4	0.530858	6.49712e-13
ENSG00000229953	AL590666.2	0.527217	9.62003e-13
ENSG00000240541	TM4SF1-AS1	0.526905	9.88571e-13
ENSG00000257702	LBX2-AS1	0.511045	6.18703e-12
ENSG00000261116	AL049555.1	0.507895	8.62158e-12
ENSG00000280693	SH3PXD2A-AS1	0.505569	1.11965e-11
ENSG00000272068	AL365181.2	0.492968	4.4297e-11
ENSG00000257556	LINC02298	0.492374	4.66024e-11
ENSG00000261488	TBILA	0.484987	9.71438e-11
ENSG00000261123	AC009065.5	0.479479	1.71725e-10
ENSG00000274173	AL035661.1	0.477537	2.09682e-10
ENSG00000254615	AC027031.2	0.473578	3.11799e-10
ENSG00000245694	CRNDE	0.471011	3.94678e-10
ENSG00000238279	BX470102.1	0.469291	4.65256e-10
ENSG00000272620	AFAP1-AS1	0.46866	4.91169e-10
ENSG00000257671	KRT7-AS	0.468481	4.9733e-10
ENSG00000224259	LINC01133	0.463679	7.91386e-10
ENSG00000180861	LINC01559	0.4634	8.09849e-10
ENSG00000269906	AL606834.1	0.461561	9.55642e-10
ENSG00000278709	NKILA	0.460885	1.00357e-09
ENSG00000259933	AC009065.2	0.459588	1.13173e-09
ENSG00000235884	LINC00941	0.459329	1.15246e-09
ENSG00000280206	AC026401.3	0.448696	3.15571e-09
ENSG00000280734	LINC01232	0.448387	3.2377e-09
ENSG00000230479	AP000695.1	0.443716	4.94128e-09
ENSG00000227053	AC105446.1	0.443594	4.97527e-09
ENSG00000255874	LINC00346	0.44021	6.7844e-09
ENSG00000260552	AC023043.1	0.43539	1.04246e-08
ENSG00000272666	U62317.1	0.433536	1.20476e-08
ENSG00000204876	AC021218.1	0.433484	1.20476e-08
ENSG00000233621	LINC01137	0.431827	1.39142e-08
ENSG00000260401	AP002761.4	0.427889	1.92125e-08
ENSG00000246582	AC100861.1	0.427666	1.95323e-08
ENSG00000257086	AP001453.2	0.427309	2.00217e-08
ENSG00000267801	AC087289.5	0.426594	2.12245e-08
ENSG00000276850	AC245041.2	0.421743	3.1525e-08
ENSG00000237523	LINC00857	0.42099	3.34426e-08
ENSG00000229656	ITGB1-DT	0.420754	3.39708e-08
ENSG00000185168	LINC00482	0.420083	3.58379e-08
ENSG00000227036	LINC00511	0.414597	5.73486e-08
ENSG00000244459	AC147067.1	0.414101	5.94995e-08
ENSG00000261068	AL512274.1	0.411843	7.17115e-08
ENSG00000225285	LINC01770	0.406285	1.12871e-07
ENSG00000265415	AC099850.3	0.393806	2.9707e-07
ENSG00000253930	TNFRSF10A-AS1	0.393784	2.9707e-07
ENSG00000214049	UCA1	0.393648	2.99487e-07
ENSG00000227695	DNMBP-AS1	0.392729	3.21358e-07
ENSG00000177337	DLGAP1-AS1	0.392541	3.25385e-07
ENSG00000237424	FOXD2-AS1	0.392337	3.29917e-07
ENSG00000228288	PCAT6	0.384878	5.81419e-07
ENSG00000266835	GAPLINC	0.383275	6.51365e-07
ENSG00000232533	AC093673.1	0.380307	8.17622e-07
ENSG00000232093	DCST1-AS1	0.379866	8.42027e-07
ENSG00000274414	AL121772.1	0.376173	1.09746e-06
ENSG00000234869	AL021392.1	0.370459	1.65937e-06
ENSG00000269680	AC008760.1	0.369615	1.76273e-06
ENSG00000172965	MIR4435-2HG	0.365766	2.29392e-06
ENSG00000249007	AL691482.3	0.365659	2.2984e-06
ENSG00000233461	AL445524.1	0.365103	2.38746e-06
ENSG00000261553	AL137782.1	0.363143	2.74176e-06
ENSG00000248810	LINC02432	0.361324	3.121e-06
ENSG00000259353	AC090515.4	0.358978	3.66407e-06
ENSG00000234678	ELF3-AS1	0.356163	4.43541e-06
ENSG00000261175	LINC02188	0.351735	6.03741e-06
ENSG00000175147	TMEM51-AS1	0.351731	6.03741e-06
ENSG00000269899	AC025857.2	0.34961	6.90581e-06
ENSG00000234380	LINC01426	0.347764	7.8321e-06
ENSG00000262001	DLGAP1-AS2	0.344256	9.94282e-06
ENSG00000260604	AL590004.3	0.337869	1.48149e-05
ENSG00000223813	AC007255.1	0.337852	1.48149e-05
ENSG00000249859	PVT1	0.333738	1.91551e-05
ENSG00000205890	AC108134.1	0.333156	1.98451e-05
ENSG00000259498	TPM1-AS	0.332771	2.01526e-05
ENSG00000235978	AC018816.1	0.331625	2.16949e-05
ENSG00000278192	AL118505.1	0.331452	2.1903e-05
ENSG00000254614	AP003068.2	0.329057	2.54262e-05
ENSG00000223552	CCR5AS	0.326338	3.02529e-05
ENSG00000187951	AC091057.1	0.320855	4.17166e-05
ENSG00000236039	AC019117.1	0.319264	4.58915e-05
ENSG00000242861	AL591895.1	0.312538	6.81163e-05
ENSG00000262188	LINC01978	0.311252	7.33327e-05
ENSG00000267288	AC138150.2	0.310574	7.59579e-05
ENSG00000235027	AC068580.3	0.310465	7.63337e-05
ENSG00000261061	AC092718.4	0.308325	8.68212e-05
ENSG00000224397	SMIM25	0.30774	8.98367e-05
ENSG00000254109	RBPMS-AS1	0.304549	0.000107542
ENSG00000259354	AC025580.2	0.302919	0.000118226
ENSG00000231890	DARS-AS1	0.30162	0.000127542
ENSG00000270210	AC104695.3	0.30024	0.000137457
ENSG00000261324	AC010168.2	-0.300306	0.000137156
ENSG00000240731	AL139287.1	-0.301068	0.000131369
ENSG00000260000	AL133338.1	-0.3012	0.000130612
ENSG00000230513	THAP7-AS1	-0.30206	0.000124385
ENSG00000272732	AC004982.1	-0.303063	0.000117402
ENSG00000254343	AC091563.1	-0.30439	0.000108398
ENSG00000178977	LINC00324	-0.305729	0.000100341
ENSG00000233230	AC079807.1	-0.30633	9.68489e-05
ENSG00000247287	AL359220.1	-0.306512	9.59434e-05
ENSG00000260526	AC109347.1	-0.306754	9.4683e-05
ENSG00000255198	SNHG9	-0.307145	9.25837e-05
ENSG00000249348	UGDH-AS1	-0.307192	9.2483e-05
ENSG00000279207	AC015813.6	-0.307217	9.2483e-05
ENSG00000218510	LINC00339	-0.309333	8.18127e-05
ENSG00000279696	AP001273.1	-0.310617	7.58938e-05
ENSG00000229127	AC007038.1	-0.310632	7.58938e-05
ENSG00000279118	AC093535.2	-0.311141	7.37047e-05
ENSG00000233038	AC011899.2	-0.311646	7.16656e-05
ENSG00000196295	GARS-DT	-0.312184	6.93962e-05
ENSG00000273576	AC009283.1	-0.312421	6.84932e-05
ENSG00000225791	TRAM2-AS1	-0.312938	6.65328e-05
ENSG00000260806	AL163051.1	-0.313329	6.50246e-05
ENSG00000240875	LINC00886	-0.313362	6.50145e-05
ENSG00000197180	AC244090.1	-0.314535	6.0442e-05
ENSG00000273486	AC096992.2	-0.314703	5.99126e-05
ENSG00000167912	AC090152.1	-0.314787	5.97059e-05
ENSG00000246763	RGMB-AS1	-0.315242	5.81039e-05
ENSG00000242759	LINC00882	-0.316461	5.38309e-05
ENSG00000272040	AC010245.2	-0.316749	5.29454e-05
ENSG00000263072	ZNF213-AS1	-0.316826	5.27874e-05
ENSG00000245552	AP000787.1	-0.316917	5.25812e-05
ENSG00000228242	AC093495.1	-0.31713	5.19688e-05
ENSG00000258056	AC009779.2	-0.317437	5.10472e-05
ENSG00000232973	CYP1B1-AS1	-0.318338	4.82514e-05
ENSG00000269352	PTOV1-AS2	-0.318526	4.77611e-05
ENSG00000273033	LINC02035	-0.318691	4.73456e-05
ENSG00000271327	AC010201.2	-0.319142	4.60702e-05
ENSG00000267871	ZNF460-AS1	-0.319149	4.60702e-05
ENSG00000198468	FLVCR1-DT	-0.319468	4.53765e-05
ENSG00000224699	LAMTOR5-AS1	-0.320278	4.31282e-05
ENSG00000233006	MIR3936HG	-0.320573	4.23912e-05
ENSG00000232995	AL592435.1	-0.320849	4.17166e-05
ENSG00000280046	AC104581.4	-0.320983	4.15203e-05
ENSG00000235016	SEMA3F-AS1	-0.321509	4.01961e-05
ENSG00000257815	AC025159.1	-0.321659	3.98832e-05
ENSG00000236144	TMEM147-AS1	-0.321928	3.92668e-05
ENSG00000184441	AP001062.1	-0.322028	3.90872e-05
ENSG00000271335	AL117336.2	-0.322676	3.75351e-05
ENSG00000239523	MYLK-AS1	-0.322734	3.74678e-05
ENSG00000260063	AL512408.1	-0.322832	3.73048e-05
ENSG00000228801	AC064807.1	-0.323295	3.62569e-05
ENSG00000245146	MALINC1	-0.323384	3.61185e-05
ENSG00000236432	AC097662.1	-0.323559	3.57774e-05
ENSG00000233527	ZNF529-AS1	-0.323792	3.53046e-05
ENSG00000232640	AL354892.2	-0.3244	3.39837e-05
ENSG00000280739	EIF1B-AS1	-0.324517	3.37916e-05
ENSG00000265458	AC132938.3	-0.32541	3.19123e-05
ENSG00000279759	AC118344.2	-0.325838	3.10812e-05
ENSG00000279722	AC007342.7	-0.325854	3.10812e-05
ENSG00000231663	COA6-AS1	-0.326	3.08773e-05
ENSG00000253200	AC037459.2	-0.327327	2.8378e-05
ENSG00000267107	PCAT19	-0.327356	2.8378e-05
ENSG00000229980	TOB1-AS1	-0.328068	2.71168e-05
ENSG00000272777	AC019131.2	-0.329283	2.50964e-05
ENSG00000231789	PIK3CD-AS2	-0.329413	2.49297e-05
ENSG00000224934	AL391684.1	-0.33048	2.3245e-05
ENSG00000186615	KTN1-AS1	-0.330792	2.2808e-05
ENSG00000245498	AP000866.1	-0.331253	2.2154e-05
ENSG00000224086	AC245452.1	-0.332357	2.06845e-05
ENSG00000278385	AC121338.2	-0.332834	2.01101e-05
ENSG00000261351	AC116913.1	-0.332893	2.0072e-05
ENSG00000278156	TSC22D1-AS1	-0.332897	2.0072e-05
ENSG00000238058	AL355574.1	-0.332928	2.0072e-05
ENSG00000263004	AC007114.1	-0.333248	1.97636e-05
ENSG00000260077	AC104794.3	-0.333765	1.91551e-05
ENSG00000279204	AC134043.3	-0.333993	1.89055e-05
ENSG00000275854	AC084824.4	-0.335131	1.75235e-05
ENSG00000247950	SEC24B-AS1	-0.335329	1.73248e-05
ENSG00000260317	AC009812.4	-0.335689	1.69384e-05
ENSG00000271553	AC018638.7	-0.335831	1.68107e-05
ENSG00000271780	AL118558.3	-0.33625	1.63682e-05
ENSG00000230555	AL450326.1	-0.336729	1.58709e-05
ENSG00000236540	AC006547.1	-0.336952	1.56623e-05
ENSG00000265778	AC018413.1	-0.337267	1.5359e-05
ENSG00000229214	LINC00242	-0.337727	1.49096e-05
ENSG00000260400	AL513534.2	-0.337919	1.48131e-05
ENSG00000280332	AC020917.4	-0.33795	1.48131e-05
ENSG00000272630	AL731563.3	-0.338942	1.38574e-05
ENSG00000270964	AC016355.1	-0.339039	1.37962e-05
ENSG00000236199	AL359076.1	-0.339215	1.3659e-05
ENSG00000250988	SNHG21	-0.3398	1.31418e-05
ENSG00000226688	ENTPD1-AS1	-0.340106	1.28936e-05
ENSG00000253738	OTUD6B-AS1	-0.340149	1.28843e-05
ENSG00000224914	LINC00863	-0.340427	1.26645e-05
ENSG00000216895	AC009403.1	-0.34065	1.24976e-05
ENSG00000265743	AC138207.5	-0.340721	1.2464e-05
ENSG00000145075	CCDC39	-0.340768	1.24523e-05
ENSG00000259802	AC012640.2	-0.341401	1.19388e-05
ENSG00000223960	CHROMR	-0.341837	1.16045e-05
ENSG00000279369	AC046185.3	-0.341979	1.1516e-05
ENSG00000263272	AC004148.1	-0.342347	1.12481e-05
ENSG00000279088	AC022400.6	-0.343371	1.04869e-05
ENSG00000197536	C5orf56	-0.343409	1.04839e-05
ENSG00000267249	AP005482.3	-0.343591	1.03741e-05
ENSG00000270127	AC027020.2	-0.34422	9.94454e-06
ENSG00000281103	TRG-AS1	-0.344581	9.73953e-06
ENSG00000267309	AC092295.2	-0.344812	9.60329e-06
ENSG00000259959	AC107068.1	-0.344893	9.57154e-06
ENSG00000265206	AC004687.1	-0.345686	9.06713e-06
ENSG00000272831	AC027644.3	-0.348429	7.48415e-06
ENSG00000266053	NDUFV2-AS1	-0.348907	7.24798e-06
ENSG00000277142	LINC00235	-0.350744	6.37647e-06
ENSG00000273456	AC064836.3	-0.350755	6.37647e-06
ENSG00000271147	ARMCX5-GPRASP2	-0.350912	6.32961e-06
ENSG00000258634	AL160006.1	-0.351054	6.28e-06
ENSG00000233175	AC008105.1	-0.351558	6.06875e-06
ENSG00000245573	BDNF-AS	-0.351613	6.05944e-06
ENSG00000224043	CCNT2-AS1	-0.351633	6.05944e-06
ENSG00000257557	PPP1R12A-AS1	-0.353066	5.50398e-06
ENSG00000260669	AL096870.2	-0.35316	5.47984e-06
ENSG00000227630	LINC01132	-0.35449	4.98261e-06
ENSG00000263345	AC006435.2	-0.355188	4.74478e-06
ENSG00000278175	GLIDR	-0.356135	4.43541e-06
ENSG00000276791	AC092117.1	-0.356485	4.34382e-06
ENSG00000245849	RAD51-AS1	-0.356678	4.29291e-06
ENSG00000232442	MHENCR	-0.357566	4.02919e-06
ENSG00000253982	AC100810.1	-0.357632	4.01963e-06
ENSG00000272335	AC093297.2	-0.358545	3.76515e-06
ENSG00000271646	AC099343.3	-0.358899	3.67638e-06
ENSG00000273270	AC090114.2	-0.35907	3.64836e-06
ENSG00000276698	AL136295.6	-0.359095	3.64836e-06
ENSG00000249898	MCPH1-AS1	-0.359899	3.44673e-06
ENSG00000272604	AC073073.2	-0.360082	3.40862e-06
ENSG00000246263	UBR5-AS1	-0.360733	3.25436e-06
ENSG00000241388	HNF1A-AS1	-0.361381	3.11569e-06
ENSG00000245060	LINC00847	-0.361859	3.01337e-06
ENSG00000262061	AC129507.1	-0.363193	2.73867e-06
ENSG00000240291	AL450384.2	-0.363709	2.64059e-06
ENSG00000276148	AC084824.5	-0.36483	2.43114e-06
ENSG00000267002	AC060780.1	-0.365636	2.2984e-06
ENSG00000234390	USP27X-AS1	-0.365681	2.2984e-06
ENSG00000237989	LINC01679	-0.366411	2.18936e-06
ENSG00000236088	COX10-AS1	-0.366703	2.14667e-06
ENSG00000235706	DICER1-AS1	-0.367356	2.04726e-06
ENSG00000272631	AC067750.1	-0.367469	2.03495e-06
ENSG00000261526	AC012615.1	-0.367581	2.02299e-06
ENSG00000268001	CARD8-AS1	-0.36789	1.98086e-06
ENSG00000272173	U47924.2	-0.368217	1.93684e-06
ENSG00000247828	TMEM161B-AS1	-0.36844	1.90914e-06
ENSG00000240889	NDUFB2-AS1	-0.368554	1.89753e-06
ENSG00000263843	AC022211.2	-0.368675	1.88506e-06
ENSG00000273055	AC005046.1	-0.368879	1.86076e-06
ENSG00000248092	NNT-AS1	-0.37043	1.65937e-06
ENSG00000272323	AC026801.2	-0.371381	1.54965e-06
ENSG00000278784	AL136295.7	-0.371497	1.54003e-06
ENSG00000240401	AC012358.3	-0.371554	1.53749e-06
ENSG00000261572	AC097639.1	-0.371923	1.49814e-06
ENSG00000233452	STXBP5-AS1	-0.372309	1.45771e-06
ENSG00000256092	SBNO1-AS1	-0.37235	1.4572e-06
ENSG00000273188	AL022328.3	-0.372753	1.41597e-06
ENSG00000273437	AC108673.3	-0.373691	1.31937e-06
ENSG00000170161	AL512625.1	-0.37488	1.20499e-06
ENSG00000273226	AL391834.2	-0.375725	1.13048e-06
ENSG00000247400	DNAJC3-DT	-0.37574	1.13048e-06
ENSG00000272990	AC084036.1	-0.376188	1.09746e-06
ENSG00000205913	SRRM2-AS1	-0.376451	1.07977e-06
ENSG00000203865	ATP1A1-AS1	-0.3767	1.06171e-06
ENSG00000274425	AC114271.1	-0.376992	1.0404e-06
ENSG00000280187	AC022107.1	-0.378736	9.08218e-07
ENSG00000229852	AC019205.1	-0.378932	8.9676e-07
ENSG00000250222	AC008443.5	-0.379318	8.72012e-07
ENSG00000280194	AD000864.1	-0.379641	8.52303e-07
ENSG00000234912	SNHG20	-0.379801	8.43915e-07
ENSG00000262879	AC005670.3	-0.380159	8.2492e-07
ENSG00000247796	AC008966.1	-0.381216	7.62275e-07
ENSG00000268362	AC092279.1	-0.381645	7.38588e-07
ENSG00000263731	AC145207.5	-0.382653	6.82944e-07
ENSG00000231770	TMEM44-AS1	-0.383287	6.51365e-07
ENSG00000278126	AC139768.1	-0.383801	6.27932e-07
ENSG00000267532	MIR497HG	-0.384356	6.02081e-07
ENSG00000250132	AC004803.1	-0.384814	5.81801e-07
ENSG00000228956	SATB1-AS1	-0.38486	5.81419e-07
ENSG00000254363	AC011379.2	-0.385382	5.6059e-07
ENSG00000233016	SNHG7	-0.385573	5.53625e-07
ENSG00000281912	LINC01144	-0.386112	5.31398e-07
ENSG00000232160	RAP2C-AS1	-0.386441	5.18903e-07
ENSG00000261188	Z95115.1	-0.386581	5.14574e-07
ENSG00000244879	GABPB1-AS1	-0.388304	4.48033e-07
ENSG00000261167	AC107027.3	-0.388314	4.48033e-07
ENSG00000234028	EIF2AK3-DT	-0.388979	4.26442e-07
ENSG00000272145	NFYC-AS1	-0.390284	3.83993e-07
ENSG00000272447	AL135925.1	-0.390373	3.82372e-07
ENSG00000203739	AL645568.1	-0.39093	3.66231e-07
ENSG00000261126	RBFADN	-0.391631	3.46592e-07
ENSG00000278867	AC090616.6	-0.391638	3.46592e-07
ENSG00000269918	AF131215.6	-0.391644	3.46592e-07
ENSG00000225439	BOLA3-AS1	-0.393142	3.11439e-07
ENSG00000224424	PRKAR2A-AS1	-0.394566	2.80005e-07
ENSG00000281468	AC006504.7	-0.394677	2.78319e-07
ENSG00000273247	AC097376.3	-0.394894	2.7418e-07
ENSG00000281005	LINC00921	-0.395131	2.69661e-07
ENSG00000179818	PCBP1-AS1	-0.395976	2.51937e-07
ENSG00000259994	AL353796.1	-0.396527	2.41264e-07
ENSG00000271976	AC012467.2	-0.39692	2.34147e-07
ENSG00000228544	CCDC183-AS1	-0.397779	2.184e-07
ENSG00000213904	LIPE-AS1	-0.398236	2.10776e-07
ENSG00000272010	AC100814.1	-0.398725	2.02867e-07
ENSG00000267169	AC022098.1	-0.399161	1.96112e-07
ENSG00000255310	AF131215.5	-0.400042	1.82493e-07
ENSG00000262049	AC139530.1	-0.400841	1.70992e-07
ENSG00000236618	PITPNA-AS1	-0.401219	1.66097e-07
ENSG00000279865	AC006511.3	-0.401675	1.6026e-07
ENSG00000237310	AC008267.5	-0.401728	1.60082e-07
ENSG00000272983	AL117339.4	-0.401901	1.58265e-07
ENSG00000267080	ASB16-AS1	-0.402071	1.56508e-07
ENSG00000273058	AL359921.2	-0.402107	1.56508e-07
ENSG00000234636	MED14OS	-0.402262	1.55034e-07
ENSG00000263753	LINC00667	-0.40289	1.47357e-07
ENSG00000277715	AC079174.2	-0.403578	1.39329e-07
ENSG00000269176	AP001160.3	-0.404048	1.34236e-07
ENSG00000259877	AC009113.1	-0.40435	1.31228e-07
ENSG00000259642	ST20-AS1	-0.404382	1.31228e-07
ENSG00000227199	ST7-AS1	-0.405348	1.21175e-07
ENSG00000276007	AC079414.3	-0.405349	1.21175e-07
ENSG00000278970	HEIH	-0.405769	1.17646e-07
ENSG00000279059	AC007485.2	-0.406755	1.08712e-07
ENSG00000272994	AC012360.3	-0.407412	1.03002e-07
ENSG00000256546	AC156455.1	-0.407574	1.01927e-07
ENSG00000279833	AL031846.2	-0.408324	9.57719e-08
ENSG00000264575	LINC00526	-0.408553	9.42079e-08
ENSG00000271918	AC034236.2	-0.409233	8.90458e-08
ENSG00000263069	RNF213-AS1	-0.409719	8.56249e-08
ENSG00000260236	AC099778.1	-0.411204	7.53386e-08
ENSG00000239665	AL157392.3	-0.411235	7.53386e-08
ENSG00000278834	AC073508.3	-0.412756	6.63508e-08
ENSG00000258824	AL122035.1	-0.412776	6.63508e-08
ENSG00000272356	AL080317.2	-0.413479	6.26717e-08
ENSG00000236778	INTS6-AS1	-0.414396	5.81666e-08
ENSG00000260630	SNAI3-AS1	-0.415918	5.11121e-08
ENSG00000227953	LINC01341	-0.41632	4.94823e-08
ENSG00000278989	AP001148.1	-0.417855	4.32223e-08
ENSG00000228506	AL513550.1	-0.418154	4.2228e-08
ENSG00000272374	Z97832.2	-0.41871	4.03035e-08
ENSG00000267980	AC007292.1	-0.419573	3.73976e-08
ENSG00000268996	MAN1B1-DT	-0.420324	3.51926e-08
ENSG00000261098	AP000766.1	-0.420968	3.34426e-08
ENSG00000232453	LINC02777	-0.421483	3.21553e-08
ENSG00000237499	WAKMAR2	-0.422171	3.04283e-08
ENSG00000215014	AL645728.1	-0.422404	2.99037e-08
ENSG00000274422	AC245060.5	-0.422746	2.90958e-08
ENSG00000261490	AC005674.2	-0.423403	2.74953e-08
ENSG00000247121	AC009126.1	-0.424342	2.5307e-08
ENSG00000228452	AC098484.1	-0.424393	2.52934e-08
ENSG00000245164	LINC00861	-0.424732	2.46134e-08
ENSG00000236859	NIFK-AS1	-0.425287	2.34721e-08
ENSG00000231177	LINC00852	-0.425336	2.34651e-08
ENSG00000277969	AC006449.6	-0.425447	2.33224e-08
ENSG00000273382	AL356488.3	-0.425488	2.33224e-08
ENSG00000272849	AC084018.1	-0.42617	2.19883e-08
ENSG00000257621	PSMA3-AS1	-0.426977	2.05666e-08
ENSG00000261338	AC021016.2	-0.427496	1.97609e-08
ENSG00000272462	U91328.1	-0.428163	1.88068e-08
ENSG00000228172	AL020996.1	-0.42851	1.82827e-08
ENSG00000234456	MAGI2-AS3	-0.42861	1.81918e-08
ENSG00000224660	SH3BP5-AS1	-0.428729	1.80708e-08
ENSG00000273329	AC078846.1	-0.429238	1.73017e-08
ENSG00000255135	AP002360.1	-0.430436	1.55205e-08
ENSG00000255121	CCDC84-DT	-0.430647	1.52818e-08
ENSG00000272918	AC005070.3	-0.430806	1.5121e-08
ENSG00000245556	SCAMP1-AS1	-0.430965	1.49629e-08
ENSG00000223764	LINC02593	-0.431643	1.40953e-08
ENSG00000272463	AL357054.4	-0.432764	1.27854e-08
ENSG00000260855	AL591848.4	-0.432952	1.26169e-08
ENSG00000270039	AC025165.5	-0.433499	1.20476e-08
ENSG00000267904	AC024075.1	-0.434095	1.15255e-08
ENSG00000267321	SNHG30	-0.434481	1.116e-08
ENSG00000271869	AC026979.2	-0.43467	1.10119e-08
ENSG00000279278	AC245060.6	-0.434902	1.08206e-08
ENSG00000261485	PAN3-AS1	-0.43521	1.05557e-08
ENSG00000280088	AC126474.2	-0.436271	9.6232e-09
ENSG00000273271	AP000254.2	-0.437003	9.01072e-09
ENSG00000278376	AP004609.3	-0.43845	7.87016e-09
ENSG00000259291	ZNF710-AS1	-0.439139	7.39638e-09
ENSG00000267254	ZNF790-AS1	-0.43946	7.20422e-09
ENSG00000247708	STX18-AS1	-0.439683	7.08492e-09
ENSG00000267390	AC036176.1	-0.440178	6.7844e-09
ENSG00000278600	AC015871.4	-0.440581	6.58857e-09
ENSG00000270021	AC026691.1	-0.441361	6.1354e-09
ENSG00000277159	AL139384.2	-0.442681	5.41654e-09
ENSG00000254473	AL354920.1	-0.443776	4.93764e-09
ENSG00000179743	AL450998.2	-0.445697	4.10264e-09
ENSG00000259943	AL050341.2	-0.447052	3.60319e-09
ENSG00000267128	RNF157-AS1	-0.447482	3.46998e-09
ENSG00000235033	AL590999.1	-0.447754	3.3947e-09
ENSG00000237943	PRKCQ-AS1	-0.447815	3.39192e-09
ENSG00000272758	AC083798.2	-0.448314	3.24391e-09
ENSG00000274561	AC005332.3	-0.448961	3.08975e-09
ENSG00000228395	AL356481.1	-0.449652	2.89798e-09
ENSG00000277283	AC004812.2	-0.449717	2.89499e-09
ENSG00000267100	ILF3-DT	-0.44996	2.84065e-09
ENSG00000245105	A2M-AS1	-0.45034	2.74891e-09
ENSG00000275367	AC092111.1	-0.450481	2.72535e-09
ENSG00000267152	AC093227.1	-0.452882	2.14854e-09
ENSG00000206417	H1FX-AS1	-0.453062	2.12146e-09
ENSG00000260274	AC068338.2	-0.454259	1.88824e-09
ENSG00000268471	MIR4453HG	-0.457422	1.37194e-09
ENSG00000280339	AP001528.2	-0.457609	1.3535e-09
ENSG00000214783	POLR2J4	-0.457639	1.3535e-09
ENSG00000248275	TRIM52-AS1	-0.458539	1.2437e-09
ENSG00000248441	LINC01197	-0.45956	1.13173e-09
ENSG00000246695	RASSF8-AS1	-0.459752	1.12269e-09
ENSG00000254876	SUGT1P4-STRA6LP	-0.461288	9.67971e-10
ENSG00000245025	AC107959.1	-0.461469	9.55642e-10
ENSG00000272156	AC008280.3	-0.461526	9.55642e-10
ENSG00000261799	AC007406.5	-0.462633	8.61564e-10
ENSG00000276728	AC142472.1	-0.462773	8.54262e-10
ENSG00000226200	SGMS1-AS1	-0.463168	8.24683e-10
ENSG00000271913	AL035530.2	-0.464214	7.52745e-10
ENSG00000281501	SEPSECS-AS1	-0.465639	6.5154e-10
ENSG00000273148	LINC00653	-0.467032	5.65513e-10
ENSG00000279117	AP001972.5	-0.467081	5.65513e-10
ENSG00000205930	C21orf62-AS1	-0.467848	5.25164e-10
ENSG00000277449	CEBPB-AS1	-0.468384	4.99201e-10
ENSG00000259891	AC107375.1	-0.469127	4.70328e-10
ENSG00000230163	AL122010.1	-0.470237	4.23135e-10
ENSG00000255857	PXN-AS1	-0.470898	3.9678e-10
ENSG00000260948	AL390195.2	-0.47105	3.94678e-10
ENSG00000258768	AL356019.2	-0.471967	3.60948e-10
ENSG00000274828	AC068473.5	-0.472092	3.58603e-10
ENSG00000272654	AL358472.2	-0.472346	3.5138e-10
ENSG00000267040	AC027097.1	-0.473057	3.27615e-10
ENSG00000212694	LINC01089	-0.473614	3.11799e-10
ENSG00000270820	AC016727.1	-0.47465	2.81477e-10
ENSG00000227398	KIF9-AS1	-0.474898	2.75993e-10
ENSG00000247572	CKMT2-AS1	-0.477083	2.18775e-10
ENSG00000267248	AC025048.2	-0.477825	2.04647e-10
ENSG00000225756	DBH-AS1	-0.480122	1.61115e-10
ENSG00000261269	AC093278.2	-0.481407	1.40718e-10
ENSG00000259495	AC016705.2	-0.481432	1.40718e-10
ENSG00000280047	AC091825.3	-0.482798	1.22322e-10
ENSG00000280128	AL662795.2	-0.484065	1.0693e-10
ENSG00000272077	AC124045.1	-0.486018	8.71519e-11
ENSG00000259826	AC072061.1	-0.486105	8.69908e-11
ENSG00000274220	AC009163.7	-0.486352	8.52866e-11
ENSG00000180539	C9orf139	-0.486421	8.52866e-11
ENSG00000253948	VPS13B-DT	-0.486874	8.17174e-11
ENSG00000260257	AL035071.1	-0.488018	7.23412e-11
ENSG00000231999	LRRC8C-DT	-0.488388	6.99392e-11
ENSG00000267787	AC027097.2	-0.489176	6.44601e-11
ENSG00000264278	ZNF236-DT	-0.489199	6.44601e-11
ENSG00000271851	AC087501.4	-0.490401	5.69794e-11
ENSG00000235652	AL356599.1	-0.490532	5.66203e-11
ENSG00000212719	LINC02693	-0.491446	5.14146e-11
ENSG00000238113	LINC01410	-0.492381	4.66024e-11
ENSG00000273702	AC091271.1	-0.494255	3.84945e-11
ENSG00000272316	AL021368.2	-0.494823	3.63618e-11
ENSG00000221990	EXOC3-AS1	-0.495044	3.57701e-11
ENSG00000269609	RPARP-AS1	-0.496262	3.13134e-11
ENSG00000269293	ZSCAN16-AS1	-0.497997	2.5783e-11
ENSG00000225975	LINC01534	-0.49967	2.13616e-11
ENSG00000260917	AL158212.3	-0.501249	1.7881e-11
ENSG00000248508	SRP14-AS1	-0.502215	1.60922e-11
ENSG00000266947	AC022916.1	-0.503774	1.34841e-11
ENSG00000276259	AC009118.3	-0.503871	1.34618e-11
ENSG00000268087	AC008764.2	-0.505135	1.16792e-11
ENSG00000246100	LINC00900	-0.506006	1.07291e-11
ENSG00000205791	LOH12CR2	-0.508367	8.22513e-12
ENSG00000215067	ALOX12-AS1	-0.509026	7.67099e-12
ENSG00000273893	AL133520.1	-0.510362	6.58342e-12
ENSG00000228878	SEPTIN7-AS1	-0.510762	6.33683e-12
ENSG00000251867	AC009812.1	-0.511614	5.83332e-12
ENSG00000257698	GIHCG	-0.511922	5.67914e-12
ENSG00000273015	AC008124.1	-0.512331	5.46072e-12
ENSG00000245904	AC025164.1	-0.513536	4.75891e-12
ENSG00000259663	AC010478.1	-0.513987	4.55204e-12
ENSG00000235381	AL596202.1	-0.514548	4.2956e-12
ENSG00000226711	FAM66C	-0.514649	4.29248e-12
ENSG00000259623	AC125257.1	-0.515171	4.07096e-12
ENSG00000257242	LINC01619	-0.51567	3.8719e-12
ENSG00000259319	AF111167.2	-0.520006	2.27314e-12
ENSG00000272106	AL691432.2	-0.52246	1.68478e-12
ENSG00000176593	AC008969.1	-0.522665	1.662e-12
ENSG00000270175	AC023509.3	-0.52453	1.32564e-12
ENSG00000249249	AC010226.1	-0.52763	9.23975e-13
ENSG00000259834	AL365361.1	-0.529119	7.71549e-13
ENSG00000267454	ZNF582-AS1	-0.529736	7.21549e-13
ENSG00000267481	AC011477.2	-0.529982	7.08463e-13
ENSG00000272368	AC074032.1	-0.530287	6.90262e-13
ENSG00000230844	ZNF674-AS1	-0.531034	6.44028e-13
ENSG00000266490	AC127024.5	-0.531465	6.17526e-13
ENSG00000231113	AL035587.1	-0.534572	4.15779e-13
ENSG00000224078	SNHG14	-0.535458	3.75139e-13
ENSG00000271895	AL109811.2	-0.53551	3.75139e-13
ENSG00000234160	AL513165.1	-0.536063	3.56892e-13
ENSG00000274712	AC005332.4	-0.537515	2.98565e-13
ENSG00000180769	WDFY3-AS2	-0.539565	2.34038e-13
ENSG00000224165	DNAJC27-AS1	-0.540133	2.20366e-13
ENSG00000261094	AC007066.2	-0.544686	1.24719e-13
ENSG00000270091	AC015726.1	-0.546972	9.26491e-14
ENSG00000266904	LINC00663	-0.5475	8.76753e-14
ENSG00000235314	LINC00957	-0.5486	7.81014e-14
ENSG00000230091	TMEM254-AS1	-0.549089	7.4361e-14
ENSG00000272143	FGF14-AS2	-0.552025	5.04878e-14
ENSG00000268895	A1BG-AS1	-0.552336	5.00735e-14
ENSG00000231856	AL162377.1	-0.553417	4.38867e-14
ENSG00000255455	AP003486.1	-0.553628	4.35048e-14
ENSG00000237037	NDUFA6-DT	-0.553777	4.35048e-14
ENSG00000175611	LINC00476	-0.555939	3.34726e-14
ENSG00000279348	AC012513.3	-0.557294	2.8219e-14
ENSG00000258441	LINC00641	-0.557544	2.78764e-14
ENSG00000228794	LINC01128	-0.558023	2.66608e-14
ENSG00000280254	AC233723.2	-0.558733	2.46743e-14
ENSG00000234327	AC012146.1	-0.55984	2.15768e-14
ENSG00000264247	LINC00909	-0.562615	1.48034e-14
ENSG00000266916	ZNF793-AS1	-0.563542	1.32798e-14
ENSG00000203497	PDCD4-AS1	-0.56447	1.19138e-14
ENSG00000260572	AC069224.1	-0.565332	1.07963e-14
ENSG00000166770	ZNF667-AS1	-0.565662	1.05878e-14
ENSG00000261879	AC087500.1	-0.565723	1.05878e-14
ENSG00000244968	LIFR-AS1	-0.566188	1.04093e-14
ENSG00000224281	SLC25A5-AS1	-0.569338	6.73483e-15
ENSG00000227354	RBM26-AS1	-0.574414	3.24325e-15
ENSG00000267414	AC120049.1	-0.574777	3.17508e-15
ENSG00000260329	AC007541.1	-0.577427	2.19493e-15
ENSG00000258301	VASH1-AS1	-0.577558	2.19493e-15
ENSG00000260804	LINC01963	-0.577717	2.19493e-15
ENSG00000234684	SDCBP2-AS1	-0.578092	2.19493e-15
ENSG00000251615	AC104825.1	-0.580519	1.5902e-15
ENSG00000272501	AL662844.4	-0.583711	1.00937e-15
ENSG00000250802	ZBED3-AS1	-0.584032	1.00341e-15
ENSG00000261534	AL596244.1	-0.584567	9.66544e-16
ENSG00000230487	PSMG3-AS1	-0.585906	8.22091e-16
ENSG00000280120	AC073857.1	-0.586275	8.1636e-16
ENSG00000255389	Z97989.1	-0.59037	4.49123e-16
ENSG00000268912	AC012313.5	-0.59124	4.13599e-16
ENSG00000263050	AC090617.5	-0.599015	1.23848e-16
ENSG00000231889	TRAF3IP2-AS1	-0.599374	1.23848e-16
ENSG00000258057	BCDIN3D-AS1	-0.600164	1.1702e-16
ENSG00000269044	AC024075.2	-0.6034	7.96073e-17
ENSG00000273729	AC007686.3	-0.603675	7.96073e-17
ENSG00000260296	AC095057.3	-0.611494	2.41144e-17
ENSG00000204934	ATP6V0E2-AS1	-0.622306	4.00153e-18
ENSG00000238197	PAXBP1-AS1	-0.627944	1.85278e-18
ENSG00000236901	MIR600HG	-0.62991	1.50652e-18
ENSG00000260966	AP001486.2	-0.630187	1.50652e-18
ENSG00000271614	ATP2B1-AS1	-0.630881	1.50652e-18
ENSG00000246985	SOCS2-AS1	-0.640176	4.38368e-19
ENSG00000260686	AC008669.1	-0.670194	1.5046e-21
ENSG00000251034	AC087854.1	-0.686965	7.31835e-23

## Sheet: UVM
Supplementary Table 7. Table of Glycolytic score associated lncRNA in UVM
Ensemble	Symbol	R	FDR
ENSG00000172965	MIR4435-2HG	0.568483	1.96846e-06
ENSG00000261253	AC137932.2	0.550312	4.43718e-06
ENSG00000267475	AC008736.1	0.496328	5.37467e-05
ENSG00000272172	AC138696.2	0.486018	8.04972e-05
ENSG00000260231	KDM7A-DT	0.483916	8.55914e-05
ENSG00000259038	AL121820.2	0.469595	0.000156294
ENSG00000273145	BX537318.1	0.459739	0.000218011
ENSG00000279117	AP001972.5	0.454019	0.000267362
ENSG00000232533	AC093673.1	0.44108	0.000418365
ENSG00000278910	BANCR	0.440862	0.000418481
ENSG00000255224	AC109322.1	0.43816	0.000457732
ENSG00000212978	AC016747.1	0.435539	0.000489564
ENSG00000272449	AL139246.5	0.434931	0.000497314
ENSG00000260317	AC009812.4	0.433854	0.000512511
ENSG00000176912	TYMSOS	0.431432	0.000548998
ENSG00000206337	HCP5	0.418027	0.000820259
ENSG00000224397	SMIM25	0.414998	0.000910309
ENSG00000272173	U47924.2	0.398303	0.00157769
ENSG00000225106	AL162457.2	0.390416	0.00194223
ENSG00000204054	LINC00963	0.387316	0.00209392
ENSG00000249859	PVT1	0.386543	0.0021337
ENSG00000267174	AC011472.2	0.378549	0.00275948
ENSG00000277496	AL357033.4	0.373995	0.00310469
ENSG00000260219	CD2BP2-DT	0.364545	0.00411711
ENSG00000255874	LINC00346	0.34481	0.00700153
ENSG00000261505	AL031714.1	-0.328569	0.0104592
ENSG00000245105	A2M-AS1	-0.340601	0.00768832
ENSG00000262877	AC110285.2	-0.343395	0.00719509
ENSG00000223745	CCDC18-AS1	-0.343705	0.0071769
ENSG00000234072	AC074117.1	-0.358881	0.00472016
ENSG00000278126	AC139768.1	-0.360511	0.0045182
ENSG00000270580	AC139256.2	-0.362931	0.00426162
ENSG00000188004	SNHG28	-0.36329	0.00422686
ENSG00000249042	AC008771.1	-0.36398	0.00416239
ENSG00000244953	AC087521.1	-0.364587	0.00411711
ENSG00000231817	LINC01198	-0.364613	0.00411711
ENSG00000247400	DNAJC3-DT	-0.365287	0.00408385
ENSG00000268895	A1BG-AS1	-0.367499	0.00379389
ENSG00000272457	AC113194.1	-0.368978	0.00361594
ENSG00000267100	ILF3-DT	-0.369022	0.00361594
ENSG00000251432	LINC02615	-0.37046	0.00347724
ENSG00000224424	PRKAR2A-AS1	-0.3709	0.00345432
ENSG00000261512	AC092368.3	-0.374632	0.00304816
ENSG00000250222	AC008443.5	-0.375681	0.00296216
ENSG00000247934	AC022364.1	-0.375689	0.00296216
ENSG00000235381	AL596202.1	-0.377095	0.00285414
ENSG00000272523	LINC01023	-0.377216	0.00285414
ENSG00000261167	AC107027.3	-0.377956	0.00280641
ENSG00000276791	AC092117.1	-0.380956	0.00256301
ENSG00000277938	AL035252.3	-0.382742	0.00242283
ENSG00000266947	AC022916.1	-0.383443	0.00237236
ENSG00000262049	AC139530.1	-0.385975	0.00216866
ENSG00000260285	AL133367.1	-0.386571	0.0021337
ENSG00000259969	AL049838.1	-0.38755	0.00208635
ENSG00000269982	AC018809.2	-0.389135	0.00197498
ENSG00000268836	Z69706.1	-0.389372	0.00196761
ENSG00000279419	AC004925.1	-0.389491	0.00196761
ENSG00000269918	AF131215.6	-0.389814	0.00195548
ENSG00000247708	STX18-AS1	-0.389998	0.00195225
ENSG00000235513	AL035681.1	-0.390029	0.00195225
ENSG00000263004	AC007114.1	-0.391524	0.00187186
ENSG00000245468	LINC02447	-0.392973	0.00179012
ENSG00000225733	FGD5-AS1	-0.393198	0.00178458
ENSG00000274712	AC005332.4	-0.394541	0.00171348
ENSG00000272168	CASC15	-0.394601	0.00171348
ENSG00000258325	ITFG2-AS1	-0.394616	0.00171348
ENSG00000264107	AC138207.2	-0.395039	0.00170956
ENSG00000279088	AC022400.6	-0.395154	0.00170956
ENSG00000255737	AGAP2-AS1	-0.395581	0.00169337
ENSG00000274272	AC069281.2	-0.395798	0.00168896
ENSG00000250132	AC004803.1	-0.397021	0.00162944
ENSG00000269834	ZNF528-AS1	-0.397701	0.00159616
ENSG00000268996	MAN1B1-DT	-0.398666	0.00156481
ENSG00000238197	PAXBP1-AS1	-0.400794	0.0014568
ENSG00000231889	TRAF3IP2-AS1	-0.401217	0.00144151
ENSG00000279943	AC110771.1	-0.401642	0.00143509
ENSG00000272153	AL365330.1	-0.404578	0.00128509
ENSG00000235033	AL590999.1	-0.405602	0.00124127
ENSG00000271869	AC026979.2	-0.407105	0.00117605
ENSG00000182873	PRKCZ-AS1	-0.40836	0.00112514
ENSG00000272009	AL121944.1	-0.409113	0.00109841
ENSG00000262691	AC040160.1	-0.40936	0.00109447
ENSG00000242086	MUC20-OT1	-0.40968	0.00108737
ENSG00000251359	WWC2-AS2	-0.409969	0.00108174
ENSG00000250397	AP006623.1	-0.4102	0.00107868
ENSG00000253200	AC037459.2	-0.412538	0.000987103
ENSG00000267152	AC093227.1	-0.413286	0.000963684
ENSG00000258701	LINC00638	-0.414318	0.000929877
ENSG00000235706	DICER1-AS1	-0.416732	0.000853075
ENSG00000226754	AL606760.1	-0.416941	0.000851511
ENSG00000231663	COA6-AS1	-0.418006	0.000820259
ENSG00000270021	AC026691.1	-0.419777	0.000772461
ENSG00000232656	IDI2-AS1	-0.41979	0.000772461
ENSG00000203875	SNHG5	-0.420934	0.000751645
ENSG00000177410	ZFAS1	-0.420948	0.000751645
ENSG00000227199	ST7-AS1	-0.421665	0.000739463
ENSG00000277232	GTSE1-DT	-0.422084	0.000731834
ENSG00000228506	AL513550.1	-0.423356	0.000704258
ENSG00000260260	SNHG19	-0.424243	0.000688019
ENSG00000206573	THUMPD3-AS1	-0.424549	0.000684292
ENSG00000280187	AC022107.1	-0.424762	0.000683301
ENSG00000278948	AL031587.5	-0.426023	0.000652543
ENSG00000267454	ZNF582-AS1	-0.427307	0.000622467
ENSG00000242282	AC108488.1	-0.427413	0.000622467
ENSG00000246089	AC016065.1	-0.429018	0.000587438
ENSG00000251615	AC104825.1	-0.430053	0.000566241
ENSG00000263072	ZNF213-AS1	-0.430352	0.000563429
ENSG00000261879	AC087500.1	-0.431136	0.000548998
ENSG00000255517	AP002748.4	-0.43128	0.000548998
ENSG00000250786	SNHG18	-0.431773	0.000547265
ENSG00000233850	AC103563.7	-0.43235	0.000538149
ENSG00000255717	SNHG1	-0.433504	0.000516026
ENSG00000225032	AL162586.1	-0.43414	0.000510461
ENSG00000255362	LINC02761	-0.435485	0.000489564
ENSG00000276449	AC004076.2	-0.436679	0.000472707
ENSG00000257027	AC010186.3	-0.436917	0.000471955
ENSG00000279329	AC020910.6	-0.437698	0.000460025
ENSG00000272269	AL138724.1	-0.438015	0.000457732
ENSG00000279865	AC006511.3	-0.439628	0.00043803
ENSG00000203644	AC083799.1	-0.441822	0.000408567
ENSG00000224738	AC099850.1	-0.44258	0.000398738
ENSG00000235257	ITGA9-AS1	-0.443975	0.000378117
ENSG00000245614	DDX11-AS1	-0.445744	0.000352468
ENSG00000280161	AC022413.1	-0.44734	0.000331045
ENSG00000268894	PLCE1-AS1	-0.447822	0.000327116
ENSG00000248932	AC046134.2	-0.448081	0.000326565
ENSG00000272143	FGF14-AS2	-0.448265	0.000326565
ENSG00000235531	MSC-AS1	-0.450074	0.000304241
ENSG00000234771	SLC25A25-AS1	-0.451214	0.000291702
ENSG00000280422	AC115284.2	-0.451798	0.000286947
ENSG00000260276	AC022167.2	-0.452433	0.000281632
ENSG00000267169	AC022098.1	-0.452574	0.000281632
ENSG00000231419	LINC00689	-0.454027	0.000267362
ENSG00000204282	TNRC6C-AS1	-0.454919	0.000262127
ENSG00000256628	ZBTB11-AS1	-0.456038	0.00025158
ENSG00000260563	AC132872.1	-0.457301	0.000239816
ENSG00000206417	H1FX-AS1	-0.459564	0.000218011
ENSG00000228106	AL392172.1	-0.46098	0.000208672
ENSG00000254932	AP001007.1	-0.46114	0.000208672
ENSG00000186615	KTN1-AS1	-0.461595	0.000207592
ENSG00000232229	LINC00865	-0.46254	0.000200872
ENSG00000163597	SNHG16	-0.46365	0.000192848
ENSG00000237943	PRKCQ-AS1	-0.465222	0.000181061
ENSG00000270504	AL391422.4	-0.467094	0.000167496
ENSG00000236144	TMEM147-AS1	-0.468341	0.000159688
ENSG00000271270	TMCC1-AS1	-0.468598	0.000159688
ENSG00000260051	AL031600.1	-0.468706	0.000159688
ENSG00000231856	AL162377.1	-0.470019	0.000155183
ENSG00000267280	TBX2-AS1	-0.470813	0.000151327
ENSG00000243701	DUBR	-0.47098	0.000151327
ENSG00000259673	IQCH-AS1	-0.473544	0.000136034
ENSG00000221953	C1orf229	-0.474721	0.000130176
ENSG00000266904	LINC00663	-0.480089	0.000100925
ENSG00000267082	AC011472.1	-0.48147	9.55085e-05
ENSG00000182648	LINC01006	-0.48405	8.55914e-05
ENSG00000234741	GAS5	-0.485251	8.24257e-05
ENSG00000246731	AC100786.1	-0.48726	7.67173e-05
ENSG00000228022	HCG20	-0.487359	7.67173e-05
ENSG00000239445	ST3GAL6-AS1	-0.488525	7.42445e-05
ENSG00000261971	MMP25-AS1	-0.490693	6.74403e-05
ENSG00000176593	AC008969.1	-0.492608	6.20499e-05
ENSG00000259976	AC093010.3	-0.492831	6.20499e-05
ENSG00000232803	SLCO4A1-AS1	-0.494372	5.85577e-05
ENSG00000267254	ZNF790-AS1	-0.497144	5.24105e-05
ENSG00000224660	SH3BP5-AS1	-0.497336	5.24105e-05
ENSG00000270194	AC097359.2	-0.501804	4.23696e-05
ENSG00000260588	AC027702.1	-0.512345	2.41815e-05
ENSG00000255135	AP002360.1	-0.516059	2.001e-05
ENSG00000267372	AC005330.1	-0.516636	1.9761e-05
ENSG00000232640	AL354892.2	-0.518017	1.86492e-05
ENSG00000219665	ZNF433-AS1	-0.518906	1.8103e-05
ENSG00000231711	LINC00899	-0.525156	1.28938e-05
ENSG00000261534	AL596244.1	-0.525241	1.28938e-05
ENSG00000224032	EPB41L4A-AS1	-0.525435	1.28938e-05
ENSG00000245904	AC025164.1	-0.525536	1.28938e-05
ENSG00000272902	TBC1D8-AS1	-0.526456	1.28938e-05
ENSG00000267002	AC060780.1	-0.526907	1.28938e-05
ENSG00000225439	BOLA3-AS1	-0.528458	1.22186e-05
ENSG00000274922	AL139384.1	-0.529606	1.17106e-05
ENSG00000244479	OR2A1-AS1	-0.531907	1.04836e-05
ENSG00000120664	SPART-AS1	-0.532694	1.02729e-05
ENSG00000170919	TPT1-AS1	-0.534372	9.54908e-06
ENSG00000235437	LINC01278	-0.537117	8.32258e-06
ENSG00000267106	ZNF561-AS1	-0.537476	8.32258e-06
ENSG00000281005	LINC00921	-0.543799	5.86187e-06
ENSG00000262089	AC040977.1	-0.54457	5.76284e-06
ENSG00000203497	PDCD4-AS1	-0.545598	5.58016e-06
ENSG00000261183	SPINT1-AS1	-0.548269	4.87888e-06
ENSG00000223797	ENTPD3-AS1	-0.550556	4.43718e-06
ENSG00000272758	AC083798.2	-0.552793	4.07105e-06
ENSG00000248309	MEF2C-AS1	-0.553391	4.06923e-06
ENSG00000233006	MIR3936HG	-0.554125	4.0379e-06
ENSG00000260077	AC104794.3	-0.554193	4.0379e-06
ENSG00000228775	WEE2-AS1	-0.555632	3.98432e-06
ENSG00000231770	TMEM44-AS1	-0.558369	3.4898e-06
ENSG00000228274	AL021707.2	-0.565548	2.28091e-06
ENSG00000180769	WDFY3-AS2	-0.56977	1.90006e-06
ENSG00000261959	AC015909.3	-0.576319	1.28333e-06
ENSG00000226674	TEX41	-0.576892	1.28333e-06
ENSG00000183674	LINC00518	-0.58164	9.97163e-07
ENSG00000206567	AC022007.1	-0.584563	8.65563e-07
ENSG00000280099	AL603750.1	-0.585515	8.65563e-07
ENSG00000204387	SNHG32	-0.591176	6.21754e-07
ENSG00000229589	ACVR2B-AS1	-0.59163	6.21754e-07
ENSG00000223923	AC010136.1	-0.593503	6.20363e-07
ENSG00000254966	AC103974.1	-0.603494	3.24818e-07
ENSG00000241288	LINC02614	-0.616489	1.32131e-07
ENSG00000229950	TFAP2A-AS1	-0.62088	1.04749e-07
ENSG00000232160	RAP2C-AS1	-0.621969	1.04749e-07
ENSG00000235501	AC105942.1	-0.632384	5.43823e-08
ENSG00000267296	CEBPA-DT	-0.633443	5.43823e-08
ENSG00000230798	FOXD3-AS1	-0.656008	1.03491e-08
ENSG00000166770	ZNF667-AS1	-0.672061	3.04666e-09
ENSG00000233016	SNHG7	-0.707567	1.13145e-10
ENSG00000260423	LINC02367	-0.719335	5.86782e-11
